# Supplementary material
Source: publisher figshare collection journal article supplement (https://plos.figshare.com/articles/dataset/_/1614226)
Supplement: Supplementary file 1 [file 1]

Archive with 12 entries (12 files):
- S1_Appendix.docx
- S2_Appendix.pdf
- S3_Appendix.docx
- S1_Dataset.txt
- S1_PRISMA_Checklist.doc
- S1_STROBE_Checklist.docx
- S1_Table.docx
- S2_Table.docx
- S3_Table.docx
- S4_Table.docx
- S5_Table.docx
- S6_Table.docx
