# Supplementary material
Source: publisher figshare collection journal article supplement (https://plos.figshare.com/articles/dataset/_/1614226)
Supplement: Supplementary file 1 [file 1 › S1_Dataset.txt]

id	id_school	no	no2	nox	o3	ox	pm10	pm10exh	pm10nonex	pm25	pm25exh	pm25nonexh	pmcoarse	fvc	fev1	fef25	fef50	fef75	month	trunk	ethnic	observer	sex	age	temp_room	cotinine	imd	nssec	sum_skf	fmi	pet
1	1	22.59	37.12	59.71	38.74	75.87	24.14	.72	2.15	15.65	.64	.65	8.49	2.12	1.9	2.94	2.75	1.11	October	3.51	2	3	1	3	-1.22	.2	20.65	Intermediate occupations	44	1.28	1
2	1	24.13	37.98	62.11	38.41	76.4	24.44	.74	2.32	15.84	.66	.7	8.6	1.98	1.8	3.5	2.8	1.14	October	3.21	3	3	1	1	-1.07	.2	22.15	Routine & manual occupations	36.4	1.35	0
3	1	20.94	36	56.93	39.41	75.41	23.91	.66	1.97	15.56	.59	.59	8.35	2.22	2.05	3.8	2.92	1.41	October	1.71	3	3	0	3	-1.11	1.5	12.67	Managerial & professional occupations	79.6	3.3	0
4	1	13.05	28.59	41.64	44.97	73.56	22.43	.4	1.19	14.68	.36	.35	7.74	1.82	1.67	2.53	2.15	1.32	October	-7.19	2	3	1	1	-.97	.4	57.81	Intermediate occupations	24.4	1.64	1
5	1	21.83	36.66	58.5	39	75.67	24.04	.68	2.04	15.64	.61	.61	8.4	1.83	1.5	3.59	2.41	.64	October	1.11	3	3	0	1	-1.18	.05	15.18	Routine & manual occupations	59.2	2.89	0
6	1	22.81	37.15	59.95	38.76	75.91	24.22	.71	2.13	15.75	.63	.64	8.47	1.53	1.53	3.32	2.95	1.45	October	-2.19	2	3	1	1	-.97	.05	21.63	Managerial & professional occupations	21.6	1.05	0
7	1	25.5	38.76	64.26	38.08	76.84	24.63	.79	2.46	15.93	.71	.74	8.71	1.68	1.52	3.21	2.35	1.04	October	-6.49	4	3	0	2	-1.11	.05	22.15	Routine & manual occupations	34.2	2.09	0
8	1	14.85	30.29	45.14	43.58	73.87	22.69	.45	1.35	14.85	.4	.4	7.84	1.94	1.83	3.86	3.08	1.6	October	1.61	1	3	1	1	-1.07	4.2	37.15	Intermediate occupations	44.2	1.99	1
9	1	22.32	36.78	59.1	38.94	75.72	24.15	.7	2.1	15.71	.62	.64	8.44	1.95	1.63	2.53	1.72	.83	October	-3.49	2	3	0	1	-.97	.05	15.18	Intermediate occupations	30.6	1.2	1
10	1	22.31	36.97	59.28	38.79	75.76	24.12	.69	2.06	15.7	.62	.62	8.42	1.94	1.94	3.69	3.08	2.18	October	-1.29	1	3	0	2	-1.07	.05	16.23	Managerial & professional occupations	34.8	1.89	1
11	1	21.7	36.53	58.23	39.07	75.6	24.02	.68	2.02	15.63	.6	.61	8.39	1.29	1.04	1.75	1.17	.53	October	-7.39	2	3	1	2	-1.11	.05	15.18	missing	29.6	2.31	0
12	1	23.2	37.43	60.63	38.57	76	24.25	.72	2.14	15.77	.64	.64	8.48	1.8	1.74	3.68	2.71	1.45	October	-6.99	1	3	0	1	-.97	.05	16.23	Managerial & professional occupations	24.6	1.51	1
13	1	23.87	37.86	61.73	38.46	76.32	24.37	.75	2.25	15.81	.67	.68	8.56	2.14	2.05	3.9	2.61	1.75	October	3.11	1	3	1	2	-1.07	.05	23.86	Managerial & professional occupations	35	1.01	0
14	1	21.7	36.57	58.28	39.06	75.63	24.02	.68	2.03	15.62	.6	.61	8.39	1.89	1.72	4.02	2.16	1.09	October	-2.39	5	3	1	1	-1	.05	12.38	Managerial & professional occupations	35.6	2.06	1
15	1	26.31	38.66	64.97	37.97	76.63	24.82	.85	2.64	16.03	.76	.84	8.79	2.31	2.04	3.77	2.83	1.07	October	-1.39	1	3	1	1	-1		15.18	Intermediate occupations	29.2	1.33	1
16	1	21.98	36.72	58.7	39.02	75.74	24.05	.69	2.08	15.63	.61	.62	8.42	2.67	2.35	3.52	2.65	1.62	October	3.61	1	3	0	2	-1.07	.1	12.38	Intermediate occupations	48.8	2.57	1
17	2	21.89	36.62	58.52	39.02	75.64	23.99	.66	2	15.62	.59	.6	8.38	2.93	2.49	4.36	3.02	1.21	October	4.61	2	1	0	1	-1	.1	45.13	Intermediate occupations	56.2	2.68
18	2	21.58	36.54	58.12	39.04	75.58	23.98	.67	2	15.61	.6	.6	8.37	1.9	1.42	1.9	1.01	.78	October	-1.19	5	2	0	2	-1.58	.05	45.13	Intermediate occupations	28.8	1.66
19	2	23.59	37.64	61.24	38.49	76.13	24.33	.73	2.3	15.74	.65	.7	8.58	1.94	1.78	2.82	2.28	1.41	October	-2.09	5	2	0	2	-1	.05	45.13	Routine & manual occupations	76.4	3.5	0
20	2	21.95	36.7	58.65	38.96	75.67	24.01	.67	2.01	15.63	.6	.6	8.38	2.02	1.9	3.39	2.73	1.35	October	.81	1	2	1	2	-.97	2.4	45.13	Intermediate occupations	61.8	1.77	0
21	2	23.59	37.64	61.24	38.49	76.13	24.33	.73	2.3	15.74	.65	.7	8.58	2.47	1.63	2.47	1.14	.56	October	1.71	5	1	0	2	-1.11	.05	45.13	Routine & manual occupations	38.8	1.03	0
22	2	30.91	41.19	72.1	36.77	77.96	25.69	.98	3.42	16.32	.87	1.06	9.37	1.78	1.52	2.81	2.26	.93	October	.91	3	2	1	1	-.97	.05	18.11	Intermediate occupations	99.6	2.25	0
23	2	21.59	36.47	58.06	39.11	75.58	23.99	.67	2.01	15.61	.59	.6	8.38	1.92	1.76	2.93	2.31	1.31	October	4.31	5	2	1	1	-.86	1.8	45.13	Inactive	64.4	3.18	1
24	2	23.31	37.48	60.8	38.52	76	24.27	.73	2.24	15.73	.65	.68	8.54	1.54	1.25	2.27	1.61	.74	October	-5.89	1	2	1	1	-1.44	6.1	45.13	Routine & manual occupations	72.4	3.8	1
25	2	21.58	36.53	58.1	39.05	75.57	23.97	.67	2	15.6	.6	.6	8.37	1.84	1.41	2.44	1.3	.58	October	-1.99	2	1	1	1	-1.07	.05	45.13	Intermediate occupations	66.4	2.8	1
26	2	26.03	38.72	64.75	38.23	76.95	24.75	.83	2.57	15.97	.74	.78	8.78	1.95	1.45	1.89	1.44	.67	October	-1.29	2	2	0	3	-1.51	.2	16.63	Routine & manual occupations	20	1.17
27	2	26.09	39.08	65.18	37.75	76.83	24.71	.82	2.52	15.95	.73	.76	8.76	1.51	1.45	2.51	2.15	1.08	October	-5.09	1	2	0	1	-1.04	.4	16.23	Managerial & professional occupations	28.8	.83	1
28	2	26.47	39.08	65.54	37.75	76.83	24.86	.83	2.74	15.97	.74	.84	8.89	2.31	1.86	3.49	2.23	.74	October	1.11	1	1	0	1	-1.11	.05	45.13	Routine & manual occupations	49.6	1.98	1
29	2	23.19	37.48	60.66	38.68	76.16	24.24	.7	2.2	15.71	.62	.65	8.53	2.77	2.33	4.14	2.92	1.24	October	3.41	1	1	0	2	-1.22	.05	23.86	Managerial & professional occupations	22	1.11	1
30	2	22.64	37.16	59.8	38.84	76	24.17	.69	2.16	15.67	.61	.64	8.5	2.11	2	4.59	3.13	1.45	October	.81	2	2	0	2	-.89	.05	12.65	Managerial & professional occupations	23.6	.04	0
31	2	21.93	36.68	58.61	39.01	75.69	24.06	.68	2.07	15.64	.61	.63	8.42	2.53	1.93	2.9	1.67	.95	October	9.71	5	2	1	3	-1.11	.9	45.13	Managerial & professional occupations	31.6	.35	1
32	2	21.71	36.48	58.2	39.13	75.61	24.04	.67	2.04	15.64	.6	.62	8.4	3.09	2.67	4.52	3.86	1.55	October	13.31	1	1	1	1	-1.04	.2	32.53	Intermediate occupations	122.4	4.32	1
33	2	22.27	36.81	59.08	38.91	75.72	24.13	.69	2.07	15.7	.62	.63	8.43	1.57	1.35	2.16	1.87	.83	October	-7.29	1	1	0	2	-1.18	2	21.63	Intermediate occupations	44.6	2.04	0
34	2	22.32	36.75	59.06	38.99	75.74	24.15	.7	2.12	15.7	.62	.64	8.45	2.01	1.66	3.35	1.9	.77	October	1.41	2	1	1	1	-1.15	.05	32.53	Managerial & professional occupations	54.6	2.57	0
35	2	23.74	37.9	61.64	38.53	76.43	24.39	.72	2.33	15.77	.65	.69	8.62	2	1.75	4.15	3.56	1.05	October	-1.29	2	1	1	2	-1.29	.05	23.86	Inactive	25	.76	1
36	2	22.5	36.34	58.84	39.31	75.65	24.19	.68	2.13	15.76	.61	.64	8.44	3.13	2.05	3.09	1.57	.63	October	.31	2	1	1	1	-.93	3.3	46.25	Intermediate occupations	37.8	1.36	1
37	2	22.42	36.88	59.3	38.9	75.78	24.1	.7	2.12	15.64	.63	.64	8.46	1.81	1.6	3.27	2.2	1.05	October	-2.39	2	2	1	1	-1	.1	19.69	Unclassified [in work,occ unknown]	88.4	2.43	0
38	2	21.7	36.47	58.17	39.14	75.61	24.04	.67	2.03	15.64	.6	.61	8.4	1.97	1.67	2.98	2.1	.86	October	-.29	1	2	1	2	-1.07	2.5	32.53	Routine & manual occupations	77.2	2.87	1
39	2	21.62	36.56	58.18	39.03	75.59	23.99	.67	2	15.61	.6	.6	8.38	2.06	1.96	3.5	2.31	1.45	October	-.59	1	1	0	1	-1	.2	45.13	Intermediate occupations	22	1.09	1
40	2	21.28	36.25	57.53	39.25	75.5	23.96	.67	1.99	15.6	.6	.6	8.36	1.98	1.47	1.83	1.32	.79	October	-.59	3	2	0	3	-1.29	.4	15.18	Intermediate occupations	46.4	1.91	1
41	2	22.49	37.04	59.53	38.77	75.81	24.12	.7	2.13	15.66	.62	.64	8.47	2.4	1.88	3.38	1.85	.71	October	-.69	1	1	0	1	-1	.5	45.13	Intermediate occupations	29	1.56	0
42	2	21.64	36.51	58.15	39.09	75.6	24	.67	2.02	15.61	.6	.61	8.39	1.79	1.42	2.7	1.54	.52	October	-2.29	3	2	0	1	-.93	.05	45.13	Inactive	72.4	2.49	0
43	3	34.49	42.16	76.65	36.58	78.74	26.32	1.11	3.72	16.74	.99	1.15	9.57	4.02	2.94	3.79	2.7	1.24	October	7.61	1	2	0	1	.95	.6	17.71	Routine & manual occupations	94.2	2.29	1
44	3	22.51	36.64	59.15	39.19	75.83	24.22	.69	2.14	15.76	.62	.64	8.47	1.96	1.75	2.49	2.24	1.21	October	-2.39	3	2	0	3	1.53	.05	19.63	Routine & manual occupations	49.8	1.71	0
45	3	22.26	36.7	58.95	39.04	75.74	24.14	.69	2.09	15.7	.62	.63	8.44	2.39	1.27	1.43	1.11	.5	October	-3.49	2	2	0	2	.81	.05	32.53	Intermediate occupations	55.8	2.25	0
46	3	27.14	38.55	65.69	38.02	76.58	24.85	.86	2.64	16.03	.77	.8	8.83	2.45	2.23	3.3	2.73	1.51	October	.61	1	2	0	1	.52	.1	16.56	Managerial & professional occupations	62.8	1.5	0
47	3	24.2	36.8	61	38.72	75.53	24.03	.66	2.01	15.67	.59	.6	8.36	1.75	1.75	4.22	3.56	2.11	October	.91	2	2	1	1	1.02	.05	19.63	Intermediate occupations	51.4	1.7	0
48	3	23.22	36.45	59.66	38.96	75.4	23.95	.65	1.96	15.62	.58	.59	8.33	1.74	1.62	2.61	2.23	1.33	October	-5.89	3	2	0	1	1.17	.05	16.56	Intermediate occupations	75.8	2.63	0
49	3	25.69	38.27	63.96	38.4	76.68	24.76	.81	2.57	15.98	.72	.78	8.77	1.57	1.41	2.5	1.67	.97	October	-3.59	3	2	1	3	.08	.05	19.63	Routine & manual occupations	78.6	2.37	0
50	3	27.39	38.2	65.58	38.03	76.22	24.56	.75	2.39	15.93	.67	.73	8.63	2.37	2.06	3.61	3.02	1.35	October	4.01	2	2	1	2	.23	.05	13.77	Unclassified [in work,occ unknown]	28.2	1.27	0
51	3	25.89	38.11	64	38.28	76.39	24.75	.85	2.59	15.96	.76	.78	8.79	2.47	2.11	3.38	2.49	1.21	October	-2.59	3	3	0	1	1.38	.05	16.56	Managerial & professional occupations	66.6	1.73	0
52	3	20.52	35.03	55.55	40.02	75.05	24.08	.61	1.85	15.86	.54	.55	8.23	2.2	1.86	2.88	2.35	.8	October	2.11	2	2	0	2	.99	.3	28.67	Routine & manual occupations	21.6	1.38	1
53	3	24.7	37.15	61.85	38.58	75.73	24.16	.69	2.11	15.72	.62	.63	8.44	1.4	1.39	3.41	2.27	1.3	October	-6.39	3	2	1	1	.15	.05	16.56	Routine & manual occupations	42.4	1.96	0
54	3	21.1	35.99	57.09	39.45	75.45	24.09	.66	1.99	15.73	.59	.6	8.36	2.63	2.17	2.67	2.51	1.38	October	4.31	2	2	1	1	.34	.05	17.42	Intermediate occupations	91.4	2.47	0
55	3	22.63	36.85	59.48	39.03	75.88	24.2	.71	2.17	15.71	.63	.65	8.49	2.24	1.9	3.05	1.65	1.25	October	2.31	2	2	0	3	.44	.3	16.63	Routine & manual occupations	127.9	3.32	0
56	3	26.9	38.08	64.98	38.24	76.31	24.71	.78	2.42	16.06	.69	.73	8.65	1.72	1.58	3.19	2.23	.97	October	.61	3	2	1	2	.41	.2	17.71	Managerial & professional occupations	103	2.69	0
57	3	28.11	38.74	66.85	37.77	76.51	24.82	.85	2.61	16.01	.76	.79	8.81	2.01	1.34	1.82	1	.33	October	-.69	5	2	0	1	.48	.05	16.56	Unclassified [in work,occ unknown]	46.4	1.96	1
58	3	22.61	36.68	59.29	39.09	75.77	24.18	.7	2.14	15.72	.63	.64	8.46	2.04	1.57	4.54	3.22	1.47	October	4.71	2	2	1	3	1.35	.05	16.56	Intermediate occupations	94.2	2.53	0
59	3	22.39	36.81	59.2	39	75.81	24.14	.7	2.13	15.67	.62	.64	8.47	1.92	1.59	2.45	1.73	.84	October	-.89	2	2	1	1	.55	.4	16.32	Inactive	55.6	1.08	0
60	3	23.15	37.06	60.21	39.05	76.11	24.4	.71	2.26	15.86	.64	.69	8.54	2.39	1.98	3.94	2.39	.98	October	.31	2	2	1	1	1.42	.05	27.25	Managerial & professional occupations	24.4	.86	0
61	3	26.21	38.72	64.93	38.26	76.99	24.82	.83	2.62	16.01	.74	.79	8.81	1.44	1.43	4.24	2.62	1.32	October	-6.19	3	2	1	2	1.53	.05	19.63	Intermediate occupations	77.4	2.97	0
62	4	21.6	36.31	57.91	39.35	75.66	24.11	.67	2.04	15.71	.6	.61	8.4	1.98	1.76	3.16	2.28	1.09	January	1.11	3	1	1	3	.23	.05	16.52	Routine & manual occupations	44.8	2.16	0
63	4	22.97	36.41	59.38	39	75.41	23.96	.65	1.97	15.62	.58	.59	8.34	2.25	2.06	3.73	2.99	1.42	January	1.61	3	1	1	3	.62	.05	16.56	Intermediate occupations	52.8	1.8	1
64	4	21.08	36.05	57.12	39.35	75.4	23.92	.65	1.94	15.58	.58	.58	8.34	1.96	1.86	4.25	3.4	1.6	January	-5.29	2	1	1	1	.52	.6	12.37	Intermediate occupations	22.4	1.69	1
65	4	21.64	36.24	57.88	39.31	75.55	24.05	.68	2.05	15.64	.61	.62	8.4	2.07	1.58	2.68	1.55	.53	January	.91	5	1	1	3	.59	.05	13.1	Managerial & professional occupations	73.6	3.13	0
66	4	22.52	36.54	59.06	39.09	75.63	24.1	.68	2.07	15.68	.61	.62	8.42	1.69	1.44	2.21	1.83	.87	January	-4.29	2	2	1	1	-.5	.2	13.1	Managerial & professional occupations	26.8	1.54	0
67	4	21.24	36.21	57.45	39.3	75.51	23.97	.67	2.01	15.6	.59	.6	8.38	2.16	1.98	3.52	2.67	1.8	January	4.01	5	2	1	2	-.5	.1	12.67	Routine & manual occupations	30	1.31	1
68	4	21.45	36.26	57.71	39.25	75.51	23.98	.66	2	15.6	.59	.6	8.38	1.53	1.46	4.04	2.48	1.18	January	-4.99	4	2	1	2	-.57	.1	16.75	Inactive	29.6	1.88	1
69	4	21.95	36.66	58.61	39.05	75.71	24.1	.69	2.09	15.66	.61	.63	8.44	1.66	1.07	1.13	.87	.39	January	-7.99	3	2	1	4	-.42	.05	12.65	Intermediate occupations	35	2.49	0
70	4	22.06	36.62	58.68	39.09	75.7	24.09	.68	2.1	15.65	.61	.64	8.44	2.45	1.67	3.38	1.49	.17	January	-.39	2	2	1	3	-.5	.1	14.19	Intermediate occupations	92.39999	3.89	0
71	4	21.41	36.22	57.63	39.32	75.54	24	.67	2.05	15.6	.6	.62	8.4	1.68	1.55	2.92	2.1	1	January	-.09	3	2	1	1	-.86	.4	11.66	Routine & manual occupations	52.6	2.26	0
72	4	21.86	36.34	58.2	39.26	75.6	24.09	.69	2.09	15.66	.62	.63	8.43	2.4	2.03	2.5	1.82	1.51	January	3.41	1	2	1	4	-.42	.05	13.1	Managerial & professional occupations	48.8	2.3	0
73	4	22.49	36.9	59.39	38.89	75.79	24.12	.7	2.12	15.66	.63	.64	8.46	2.53	2.06	4.28	2.19	.65	January	6.91	2	1	1	4	.59		24.7	missing	29.4	.42	1
74	4	24.71	37.43	62.15	38.48	75.92	24.2	.72	2.22	15.69	.65	.67	8.51	2.53	1.95	3.23	1.75	.76	January	4.71	2	1	1	3	.55	.05	11.89	Routine & manual occupations	41	1.33	1
75	4	21.79	36.44	58.23	39.21	75.65	24.07	.69	2.1	15.63	.61	.63	8.44	1.73	1.73	4.31	3.29	1.6	January	.21	3	2	1	2	-.46	.05	11.66	Intermediate occupations	39.6	1.74	0
76	4	25.62	38.48	64.1	38.3	76.78	24.7	.81	2.56	15.93	.73	.78	8.78	2.89	2.71	5.18	4.23	2.24	January	4.61	4	1	1	4	.52	.05	16.63	Inactive	22	1.44	0
77	4	21.6	36.52	58.13	39.1	75.63	24.03	.68	2.03	15.63	.6	.61	8.4	1.87	1.73	3.34	2.26	.83	January	.91	1	2	1	4	-.5	3.4	12.65	Inactive	87.8	2.73	1
78	4	22.71	36.92	59.64	38.99	75.91	24.21	.71	2.19	15.7	.64	.66	8.51	1.9	1.62	1.44	2.29	.85	January	-3.89	3	1	1	1	.66	.4	11.66	Inactive	51	2.54	0
79	4	21.63	36.24	57.87	39.31	75.55	24.05	.68	2.05	15.64	.61	.62	8.41	2.14	1.74	3.43	1.8	.79	January	-3.39	5	1	1	2	.44	.05	13.1	Intermediate occupations	21.8	1.71	0
80	4	24.34	37.83	62.18	38.57	76.4	24.47	.77	2.39	15.82	.69	.72	8.66	2.47	1.98	2.81	1.75	1.19	January	2.31	2	2	1	4	-.46	.3	16.32	Unclassified [in work,occ unknown]	64.4	2.21	0
81	4	24.03	37.62	61.65	38.8	76.41	24.46	.75	2.33	15.85	.67	.7	8.61	2.42	1.88	2.21	1.76	.99	January	5.01	2	2	1	2	-.42	.05	19.63	Managerial & professional occupations	25	1.33	1
82	4	21.19	36.12	57.32	39.31	75.43	23.93	.65	1.96	15.58	.58	.59	8.35	1.71	1.53	2.74	2.46	.96	January	-6.09	3	1	1	1	.3	.05	16.75	Managerial & professional occupations	30.6		0
83	4	23.92	37.53	61.45	38.82	76.35	24.45	.74	2.32	15.85	.66	.7	8.6	1.8	1.59	2.75	1.43	.98	January	2.01	2	2	1	2	-.46	.05	19.63	Managerial & professional occupations	35.4	1.47	1
84	4	21.17	36.09	57.26	39.32	75.42	23.93	.65	1.95	15.59	.58	.59	8.35	2.39	1.98	3.51	2.38	.94	January	1.21	1	1	1	3	.48	.05	12.37	Intermediate occupations	83.2	3.45	1
85	4	22.26	36.66	58.91	39.14	75.8	24.22	.69	2.13	15.75	.62	.64	8.46	2.62	2.3	2.21	2.42	1.62	January	7.61	2	1	1	4	.66	.3	16.52	Routine & manual occupations	64.4	2.6	0
86	4	21.15	36.04	57.2	39.37	75.41	23.96	.65	1.95	15.62	.58	.59	8.34	2.09	2.04	3.48	2.54	1.9	January	2.71	2	2	1	3	-.53	.3	17.37	Intermediate occupations	89.6	2.98	0
87	4	21.7	36.38	58.08	39.25	75.63	24.09	.67	2.03	15.69	.6	.61	8.4	1.92	1.78	4.2	2.77	1.34	January	-1.09	1	1	1	2	.48	2.5	21.13	Inactive	32.6	.46	1
88	4	21.56	36.24	57.8	39.31	75.56	24.03	.67	2.04	15.63	.6	.61	8.4	4.25	2.1	2.99	.48	2.72	January	3.61	3	1	1	3	.52	.05	13.1	Intermediate occupations	51.4	2.04	0
89	4	22.74	36.93	59.67	38.98	75.91	24.21	.71	2.18	15.71	.63	.66	8.5	1.91	1.68	2.79	2.33	.89	January	1.01	3	2	1	2	-.6	.2	16.32	Intermediate occupations	44	1.52	0
90	4	22.07	36.55	58.61	39.18	75.72	24.12	.68	2.07	15.69	.61	.62	8.43	2.1	1.79	3.6	1.98	.94	January	-.59	2	1	1	1	.62	.05	15.1	Managerial & professional occupations	81.6	4.7	0
91	4	23.87	37.19	61.06	38.77	75.96	24.39	.76	2.31	15.8	.68	.7	8.59	1.37	.96	1.47	.63	.42	January	-8.39	3	2	1	1	-.5	.05	13.1	Inactive	39.8	2.35	0
92	4	21.53	36.24	57.77	39.32	75.56	24.03	.68	2.05	15.63	.6	.62	8.4	2.09	1.91	2.86	2.58	1.43	January	.61	5	2	1	3	-.42	1	13.1	Managerial & professional occupations	30	1.56	1
93	4	26.51	38.75	65.26	38.1	76.85	24.99	.85	2.85	16.01	.76	.86	8.98	1.96	1.52	2.61	1.71	.55	January	-.49	3	2	1	2	-.39	.1	11.66	Managerial & professional occupations	38.2	1.75	0
94	4	22.62	36.98	59.6	38.85	75.84	24.16	.71	2.15	15.68	.63	.65	8.48	1.84	1.14	1.31	1.08	.39	January	1.91	3	2	1	3	-.42	.05	24.7	Intermediate occupations	38.6	1.34	0
95	4	47.07	49.11	96.18	33.83	82.94	27.93	1.57	5.06	17.35	1.4	1.55	10.59	1.69	1.29	2.06	1.08	.83	January	1.01	3	2	1	3	-.57	.8	11.66	Managerial & professional occupations	102	4.61	0
96	5	20.54	35.16	55.69	39.94	75.1	24.02	.62	1.87	15.78	.55	.56	8.24	1.52	1.52	2.82	2.36	1.56	January	-5.39	3	3	1	3	-1.73		28.67	Intermediate occupations	37	1.61	0
97	5	23.87	37.81	61.68	38.88	76.69	24.46	.73	2.32	15.86	.65	.69	8.61	1.92	1.67	2.69	2.4	.93	January	-2.39	3	3	1	1	-1.29	.6	31.36	Intermediate occupations	27	1.42	1
98	5	32.89	41	73.9	37.09	78.1	26.12	1.07	3.72	16.55	.95	1.13	9.58	2.67	2.36	4.51	3.37	1.37	January	6.01	3	3	0	3	-1.4	.1	20.34	Routine & manual occupations	71.4	1.77	0
99	5	26.7	37.87	64.57	38.31	76.19	24.73	.77	2.46	16.05	.68	.74	8.67	2.39	1.65	3.37	1.45	.23	January	.61	2	2	1	4	-2.23	.3	28.24	Intermediate occupations	44.8	1.74	0
100	5	33.5	41.51	75.01	36.66	78.18	26	1.02	3.58	16.52	.91	1.1	9.47	2.6	1.25	1.12	.9	.65	January	6.61	2	2	1	2	-2.09	.05	19.63	missing	42.4	1.57	0
101	5	23.38	36.7	60.08	39.06	75.76	24.34	.7	2.16	15.87	.62	.65	8.47	1.92	1.83	3.73	2.82	1.29	January	-2.99	1	3	1	1	-1.47	.05	17.71	Routine & manual occupations	32.4	1.11	1
102	5	23.38	36.43	59.8	39.07	75.49	24.15	.67	2.05	15.77	.59	.62	8.38	2.83	2.6	4.62	3.6	1.87	January	-.49	1	3	0	2	-1.33	.1	28.24	Routine & manual occupations	73	2.49	0
103	5	22.68	36.82	59.5	39.14	75.96	24.26	.7	2.17	15.77	.62	.65	8.49	1.88	1.72	2.97	2.42	1.2	January	2.11	3	2	1	3	-2.45	.3	19.63	Managerial & professional occupations	60	2.23	0
104	5	26.54	38.04	64.58	38.36	76.4	24.89	.8	2.58	16.13	.71	.78	8.76	2.23	1.77	2.66	1.81	.85	January	1.21	3	2	0	2	-1.94	.3	17.71	Intermediate occupations	60.2	2.81	0
105	5	22.67	35.96	58.63	39.37	75.33	24.24	.64	1.96	15.93	.57	.59	8.31	1.82	1.5	3.32	1.77	.59	January	.61	3	3	0	3	-1.94	.05	28.67	Managerial & professional occupations	38.6	1.67	0
106	5	22.94	36.24	59.18	39.27	75.51	24.28	.67	2.08	15.89	.6	.62	8.39	2.45	2.17	2.45	2.44	1.79	January	4.01	1	3	1	4	-1.33	.05	20.34	Managerial & professional occupations	27.6	.32	1
107	5	23.21	36.58	59.79	39.09	75.67	24.22	.67	2.07	15.81	.6	.62	8.41	1.07	1.02	1.98	1.47	.89	January	-4.99	3	2	0	1	-2.05	.05	18.94	Managerial & professional occupations	16.8	1.58	0
108	5	21.87	36.19	58.06	39.45	75.64	24.11	.66	2.03	15.73	.59	.61	8.38	2.36	1.92	2.78	2.23	.94	January	3.71	1	2	0	1	-2.38	1.3	32.1	Inactive	49.8	2.61	0
109	5	22.3	36.68	58.97	39.13	75.81	24.22	.69	2.13	15.76	.62	.64	8.47	2.48	1.84	3.52	1.68	.69	January	4.71	2	2	0	4	-1.94	.05	16.52	Intermediate occupations	34.2	2.04	0
110	5	24.76	36.94	61.7	38.72	75.66	24.28	.68	2.12	15.85	.61	.64	8.43	2.78	2.09	3.44	2.19	.72	January	4.11	2	2	0	4	-2.34	.05	28.24	missing	31.8	1.75	0
111	5	38.56	42.52	81.08	35.66	78.18	25.92	1	3.42	16.57	.89	1.05	9.36	2.16	1.87	3.06	2.5	1.01	January	-.59	3	3	0	4	-1.4	.05	13.77	Routine & manual occupations	34.6	1.55	0
112	5	23.21	36.58	59.79	39.09	75.67	24.22	.67	2.07	15.81	.6	.62	8.41	1.64	1.44	2.55	1.78	.85	January	-5.49	3	2	0	1	-1.98	.05	18.94	Managerial & professional occupations	21.6	1.63	0
113	5	21.63	36.14	57.77	39.45	75.59	24.14	.67	2.04	15.75	.59	.61	8.39	2.19	1.9	3.02	2.42	1.05	January	.51	3	3	0	1	-1.58	.05	13.77	Intermediate occupations	58.2	2.29
114	5	39.03	42.66	81.69	35.56	78.21	25.93	1	3.42	16.57	.89	1.05	9.36	2.23	1.76	2.9	1.71	.75	January	-2.49	1	3	0	2	-1.69	4.3	13.77	Inactive	24.4	.97	0
115	5	22.48	36.87	59.35	39.15	76.02	24.25	.69	2.15	15.76	.62	.64	8.48	2.44	2.1	3.6	2.57	1.24	January	1.11	5	2	0	3	-2.01	.2	23.08	Intermediate occupations	56.2	2.79	0
116	5	25.89	37.6	63.49	38.38	75.98	24.4	.72	2.26	15.86	.64	.68	8.54	1.5	1.49	3.34	2.27	1.39	January	-4.99	2	3	0	1	-1.22	.7	13.77	Managerial & professional occupations	16.6	.81	0
117	5	25.54	37.29	62.83	38.53	75.82	24.37	.7	2.19	15.89	.63	.66	8.49	2.39	2.03	3.88	3	1.01	January	1.71	2	3	1	4	-1.76	.05	28.24	Unclassified [in work,occ unknown]	45	1.26	0
118	5	23.43	36.54	59.97	39.14	75.68	24.39	.7	2.18	15.92	.62	.66	8.47	2.16	1.62	1.94	1.52	1.06	January	1.31	1	2	1	2	-2.27	1.9	20.34	Managerial & professional occupations	24.8	1.44	1
119	5	28.01	38.9	66.92	38.05	76.95	25.38	.89	2.97	16.34	.79	.9	9.04	2.06	1.53	1.92	1.54	.8	January	-4.79	3	2	1	2	-2.56	.05	20.34	Managerial & professional occupations	34.4	1.98	0
120	5	26.74	38.27	65	38.27	76.54	24.85	.8	2.55	16.1	.72	.78	8.74	2.08	1.76	3	2.15	.93	January	-1.09	1	2	1	1	-1.94	.5	17.71	Inactive	22.8	1.63	0
121	5	29.15	39.4	68.55	37.79	77.19	25.5	.92	3.09	16.37	.82	.94	9.13	2.1	1.78	1.93	2.66	1.05	January	.81	5	2	0	3	-2.12	.05	20.34	Routine & manual occupations	31.4	1.62	0
122	5	22.22	36.29	58.51	39.33	75.62	24.22	.68	2.09	15.8	.61	.63	8.42	2.12	1.8	3.69	2.28	.88	January	1.51	3	3	1	4	-1.47	.05	17.71	Intermediate occupations	58.2	2.01	0
123	6	23.04	37.29	60.34	38.86	76.15	24.28	.7	2.22	15.74	.62	.66	8.54	2.69	2.13	3.45	2.62	.8	June	12.71	2	3	1	4	.52	.1	21.13	Managerial & professional occupations	140.4	5.12	1
124	6	25.46	38.52	63.97	38.52	77.04	24.7	.79	2.49	15.99	.7	.75	8.71	2.92	2.26	4.08	2.43	.98	June	10.41	1	3	0	3	-.17	1.6	33.13	Managerial & professional occupations	36.4	1.02	1
125	6	23.07	37.25	60.32	38.9	76.15	24.32	.7	2.23	15.77	.63	.66	8.55	3.15	2.26	3.63	2	.97	June	7.21	5	3	0	3	.26	.05	21.13	Managerial & professional occupations	86	2.65	0
126	6	24.61	37.04	61.65	38.61	75.65	24.05	.66	2.01	15.68	.59	.61	8.37	2.33	2	3.1	2.68	1.18	June	.91	2	3	1	4	.08	.7	23.81	Inactive	26.4	.88	0
127	6	29.29	41.29	70.57	37.49	78.77	25.03	.89	2.79	16.06	.79	.81	8.97	1.83	1.54	2.63	1.75	.82	June	1.51	2	1	0	4	.23	.05	20.18	Managerial & professional occupations	25.6	1.29	0
128	6	24.18	37.65	61.83	38.72	76.37	24.48	.74	2.32	15.89	.66	.71	8.59	1.37	1.2	2.22	1.96	.74	June	-9.09	2	3	0	4	.73	1.1	28.2	Intermediate occupations	50	3.19	0
129	6	26.42	39.93	66.35	38.21	78.15	24.64	.78	2.56	15.83	.7	.73	8.81	2.15	1.71	3.44	1.95	.71	June	.91	2	3	0	4	.77	.05	15.2	Intermediate occupations	47	2.13	0
130	6	27.34	39.55	66.89	37.95	77.5	24.92	.86	2.68	16.07	.76	.82	8.85	2.63	2.02	3.24	1.79	.76	June	3.51	2	1	0	2	.01	.05	20.25	Managerial & professional occupations	20.4	1.06	0
131	6	23.48	37.3	60.77	38.73	76.03	24.33	.74	2.23	15.8	.66	.68	8.53	1.62	1.52	3.72	2.41	1.01	June	.51	3	3	1	3	.34	.05	24.73	Managerial & professional occupations	19.6	.5	0
132	6	24.76	37.26	62.03	38.68	75.94	24.23	.68	2.09	15.81	.61	.63	8.43	1.99	1.8	2	2.59	.81	June	-2.19	4	1	1	4	-.32	.1	20.33	Inactive	21.6	1	0
133	6	25.5	37.72	63.21	38.69	76.41	24.29	.75	2.29	15.74	.67	.69	8.54	2.28	1.94	3.63	2.45	1.04	June	2.71	5	3	0	2	.7	.05	14.46	Routine & manual occupations	30.4	1.14	1
134	6	55.16	52.39	107.55	32.45	84.84	30.16	1.7	7.08	18.24	1.51	2.24	11.92	2.46	2.11	3.98	2.49	1.15	June	4.21	1	3	1	3	.12	6.9	21.67	Routine & manual occupations	65	1.87	0
135	6	25.26	38.31	63.57	38.47	76.78	24.75	.79	2.53	16.01	.7	.78	8.74	1.87	1.49	2.44	1.46	.7	June	-4.29	2	3	0	2	.34	.05	28.2	Unclassified [in work,occ unknown]	16	.62	1
136	6	22.76	36.95	59.72	39	75.95	24.24	.7	2.15	15.76	.63	.65	8.48	2.3	2.05	3.74	2.62	1.31	June	-2.19	3	1	0	4	-.28	.8	21.67	Unclassified [in work,occ unknown]	21.4	1.23	0
137	6	22.54	35.11	57.66	40.52	75.63	23.82	.62	2.07	15.46	.56	.62	8.36	2.38	2.1	4.21	2.59	1.14	June	2.41	2	1	0	4	.05	.05	14.83	Intermediate occupations	21.8	1.13	0
138	6	26.56	39.36	65.92	38.19	77.55	24.81	.83	2.66	15.95	.74	.79	8.86	2.14	1.8	3.35	1.45	1.09	June	3.21	1	3	0	4	.37	1.1	21.67	Routine & manual occupations	30	1.04	1
139	6	28.22	40.07	68.29	37.74	77.81	25	.88	2.73	16.11	.79	.84	8.89	1.27	1.12	2.4	1.38	.64	June	-6.89	4	3	1	4	.23	.8	20.25	Intermediate occupations	24.8	1.38	0
140	6	21.58	35.84	57.42	39.89	75.74	23.98	.71	2.06	15.6	.63	.64	8.39	1.84	1.72	4.82	2.9	1.25	June	-.89	2	3	1	4	.81	.05	16.64	Managerial & professional occupations	28	1.2	1
141	6	21.52	36.42	57.94	39.37	75.79	24.04	.67	2.06	15.63	.6	.62	8.41	1.87	1.68	4.06	2.06	.99	June	.61	4	3	0	4	.77	.05	21.67	Unclassified [in work,occ unknown]	82.4	2.51
142	6	24.88	38.16	63.04	38.49	76.65	24.54	.77	2.37	15.9	.69	.72	8.64	1.97	1.42	2.63	1.28	.45	June	3.11	2	3	1	4	.37	.05	21.67	Managerial & professional occupations	96	3.05	0
143	6	22.67	36.9	59.56	39.09	75.99	24.23	.7	2.15	15.75	.63	.65	8.47	2.69	1.71	2.43	1.88	.4	June	8.51	2	3	1	4	-.06		20.25	Unclassified [in work,occ unknown]	50	2.01	0
144	6	28.65	39.78	68.43	37.64	77.42	24.98	.82	2.63	16.16	.73	.81	8.82	3.47	2.94	4.8	4.02	1.4	June	10.11	1	1	0	4	-.17	.7	28.2	Intermediate occupations	104.6	3.81	0
145	6	38.7	45.46	84.16	35.63	81.08	26.57	1.23	3.9	16.84	1.1	1.2	9.73	2.26	1.92	3.56	2.34	.9	June	4.71	2	1	1	2	.3	.05	18.31	Unclassified [in work,occ unknown]	111	4.81
146	6	24.4	37.89	62.29	38.61	76.5	24.45	.75	2.28	15.88	.67	.69	8.57	2.45	2.17	5.01	3.09	1.62	June	.61	3	1	0	3	-.06	.05	21.67	Routine & manual occupations	69.4	3.35	0
147	6	21.89	36.46	58.35	39.15	75.61	24.07	.67	2.03	15.68	.6	.62	8.4	1.97	1.68	2.59	2.44	.94	June	-3.79	5	1	0	4	-.35	.2	17.15	Intermediate occupations	20.4	1	1
148	6	28.66	40.14	68.8	37.74	77.89	25.3	.9	2.98	16.24	.81	.91	9.06	1.8	1.62	4.97	2.48	.93	June	-3.49	5	1	0	4	-.24	.3	18.31	Intermediate occupations	31.2	2.02	0
149	6	20.98	35.91	56.88	39.54	75.45	23.92	.65	1.97	15.59	.58	.59	8.34	1.8	1.71	3.22	2.46	1.72	June	-2.79	2	3	1	2	-.1	.05	20.25	Intermediate occupations	63.8	2.97	0
150	6	30.44	40.81	71.26	37.28	78.1	25.55	.99	3.19	16.33	.88	.98	9.22	1.1	.68	.95	.49	.17	June	-2.59	3	3	0	2	.05	.8	19.63	Inactive	24	1.19	0
151	6	22.58	36.76	59.34	39.06	75.82	24.29	.71	2.14	15.82	.63	.65	8.47	2.28	1.97	3.32	2.23	1.23	June	-3.29	1	1	0	3	-.1	.05	21.01	Intermediate occupations	22.4	1.3	0
152	6	23.4	37.21	60.61	38.88	76.1	24.45	.74	2.27	15.89	.66	.69	8.56	2.03	1.7	3.91	1.92	.82	June	.41	5	3	0	2	.77	.1	21.01	Intermediate occupations	29.4	1.13	0
153	6	21.59	35.52	57.12	39.67	75.19	24.15	.63	1.9	15.89	.56	.57	8.26	2	1.71	3.23	2.19	1.8	June	3.51	1	1	1	4	.08	.3	28.67	Intermediate occupations	78.4	2.77	1
154	6	23.04	37.04	60.08	39.07	76.11	24.39	.72	2.23	15.86	.64	.67	8.52	2.08	1.73	2.58	2.27	.89	June	-.09	5	1	1	3	-.42	1.4	33.13	Intermediate occupations	42	2.12	1
155	6	26.46	39.12	65.58	38.15	77.28	24.94	.82	2.74	16.03	.73	.82	8.91	2.64	1.87	3.61	1.69	.3	June	-3.59	3	1	0	4	-.64	.05	23.08	Managerial & professional occupations	25.8	1.63	0
156	6	23.08	37.08	60.16	38.93	76.01	24.28	.7	2.12	15.82	.63	.64	8.46	2.78	2.51	5.44	1.79	1.57	June	4.71	4	1	0	4	-.5	.9	37.6	Unclassified [in work,occ unknown]	35.4	1.31	0
157	6	28.73	39.54	68.27	37.61	77.15	25.3	.96	2.92	16.29	.86	.91	9.01	2.48	2.3	3.37	2.57	1.8	June	5.41	3	1	1	4	-.03	.1	17.42	Intermediate occupations	25.8	.9	0
158	6	22.06	36.77	58.83	38.9	75.68	24.02	.68	2.06	15.61	.61	.62	8.41	3.32	2.67	3.74	2.81	1.77	June	7.11	1	1	0	4	.12	.05	13.73	Managerial & professional occupations	16.4	.81	1
159	6	24.27	38.01	62.28	38.73	76.73	24.52	.74	2.38	15.87	.66	.71	8.65	2.17	1.7	3.17	1.73	.7	June	-1.09	3	3	0	4	.37	.05	23.08	Managerial & professional occupations	70.4	2.23	1
160	6	21.28	36.26	57.54	39.42	75.68	24.02	.67	2.03	15.62	.59	.61	8.39	2.39	1.87	3.5	1.87	.72	June	.31	1	3	1	3	.81	.05	21.67	Managerial & professional occupations	80	2.81	0
161	6	30.56	41.55	72.11	37.2	78.76	25.35	.95	3.03	16.22	.85	.91	9.13	1.72	1.53	2.88	1.99	.91	June	-3.99	3	3	0	2	-.24	.05	21.67	Managerial & professional occupations	53	1.79	1
162	6	24.67	37.11	61.78	38.69	75.8	24.14	.67	2.09	15.72	.6	.63	8.42	2.05	1.62	3.91	1.92	.45	June	1.71	2	3	0	4	.62	.5	24.51	Routine & manual occupations	33.6	1.12	0
163	6	27.86	39.94	67.8	36.86	76.8	25	.82	2.33	16.33	.73	.68	8.67	2.83	2.49	3.67	2.56	1.93	June	8.71	1	3	0	4	.84	6.3	42.11	Intermediate occupations	96.6	2.37	1
164	6	21.35	36.18	57.53	39.4	75.57	24.15	.66	2.02	15.77	.59	.61	8.38	1.9	1.88	3.05	2.7	1.71	June	-3.59	2	1	1	3	-.53	.2	28.2	Routine & manual occupations	25	1.37	0
165	6	25.74	38.59	64.34	38.36	76.95	24.85	.81	2.6	16.06	.72	.8	8.79	2.27	1.75	3.45	1.79	.69	June	-1.59	3	1	1	3	.08	.05	18.31	Inactive	53.2	2.37	1
166	7	20.1	35.3	55.4	39.95	75.25	23.76	.63	1.89	15.48	.56	.57	8.28	3.25	2.86	4.22	3.25	2.02	June	1.61	1	1	0	3	.23		23.41	Routine & manual occupations	20	1.03	0
167	7	19.74	35.09	54.83	40.08	75.17	23.73	.62	1.86	15.47	.55	.56	8.25	2.04	1.81	3.7	2.31	.99	June	-2.29	1	2	1	3	-.28	1.7	23.41	Intermediate occupations	58.8	2.48	1
168	7	20.54	35.47	56.01	39.89	75.36	23.87	.65	1.96	15.54	.58	.59	8.32	2.44	2.28	4.92	3.58	1.95	June	5.51	2	2	1	4	.81	.05	24.24	Intermediate occupations	62.6	1.62	0
169	7	20.91	34.96	55.87	40.1	75.06	23.6	.6	1.83	15.38	.54	.56	8.22	2.13	1.95	3.22	2.71	1.4	June	.21	1	2	0	2	-.35	.05	38.34	Unclassified [in work,occ unknown]	42.2	1.95	0
170	7	21.53	36.36	57.88	39.32	75.68	24.06	.67	2.06	15.65	.6	.62	8.41	2.76	2.22	3.93	3.15	.66	June	7.51	1	1	1	4	-.13	.3	21.67	Intermediate occupations	85.2	2.56	1
171	7	21.16	36.15	57.31	39.43	75.58	23.98	.66	2.01	15.61	.59	.61	8.38	2.68	2.26	4.46	2.72	1.17	June	3.91	1	1	0	4	.26	.05	11.82	missing	26.4	1.4
172	7	22.69	36.95	59.64	39.02	75.97	24.26	.7	2.18	15.76	.62	.66	8.5	1.49	1.32	3.32	1.93	.85	June	-4.79	2	2	0	3	-.21	.1	17.37	Intermediate occupations	58	3.26	0
173	7	21.53	35.68	57.21	39.63	75.31	23.82	.62	1.9	15.53	.55	.58	8.28	2.92	1.72	2.2	1.38	.65	June	5.01	1	2	1	4	.3	1.4	15.21	Intermediate occupations	101.2	2.7	0
174	7	20.04	35.09	55.13	40.05	75.14	23.72	.61	1.85	15.47	.55	.56	8.25	2.57	2.03	3.67	2.14	.79	June	2.41	2	1	0	4	.15	.05	35.04	Intermediate occupations	58.6	3.3	0
175	7	26.07	38.07	64.13	38.44	76.51	24.86	.81	2.67	16.04	.72	.82	8.82	1.92	1.5	2.49	.95	.72	June	-2.89	2	1	0	3	.26	.4	46.25	Unclassified [in work,occ unknown]	17	.87	0
176	7	21.65	36.3	57.95	39.29	75.58	24.04	.68	2.05	15.64	.6	.62	8.4	2.41	2.02	4.18	2.39	.93	June	5.71	5	1	1	4	-.28	.05	13.1	Intermediate occupations	63.2	1.69	0
177	7	28.45	39.67	68.12	38.14	77.8	25.3	.91	3.12	16.16	.81	.97	9.14	2.34	2.01	2.46	2.94	1.37	June	1.01	1	1	0	4	-.5	.2	24.24	Routine & manual occupations	71.4	4.07	1
178	7	21.3	36.23	57.53	39.38	75.61	24.01	.66	2.03	15.62	.59	.61	8.39	2.67	2.35	4.42	3.38	1.35	June	6.11	2	1	0	4	-.21	.05	11.82	Intermediate occupations	22.6	1.05	0
179	7	21.21	36.02	57.23	39.65	75.66	23.99	.67	2.04	15.6	.6	.62	8.39	2.6	1.91	2.67	1.62	.53	June	5.51	1	2	1	4	.05	2.6	41.35	Managerial & professional occupations	111.8	3.55
180	7	20.74	35.71	56.45	39.8	75.5	23.91	.65	1.98	15.57	.58	.6	8.34	1.82	1.57	2.94	1.89	.85	June	-1.79	1	2	1	3	1.06	2.7	41.35	Intermediate occupations	32.6	1.44	1
181	7	21.2	35.93	57.13	39.71	75.64	23.99	.67	2.05	15.6	.59	.62	8.39	2.42	2.19	5.47	3.96	1.56	June	1.91	2	1	1	3	.08	.7	25.11	Intermediate occupations	73.6	3.59	0
182	7	17.7	33.2	50.9	41.39	74.59	23.24	.55	1.65	15.17	.49	.5	8.07	2.43	1.95	3.43	1.9	.82	June	3.21	5	2	0	4	.73	.05	12.37	Managerial & professional occupations	88	2.6	1
183	7	19.96	35.16	55.12	40.08	75.24	23.79	.63	1.9	15.5	.56	.58	8.29	2.31	2.05	3.57	3.08	1.58	June	-1.49	3	1	0	2	-.03	.2	23.72	Managerial & professional occupations	41	2.55	0
184	7	21.21	35.76	56.97	39.96	75.72	23.97	.68	2.09	15.56	.61	.64	8.41	2.89	2.41	4.16	3.01	1.31	June	3.21	1	2	0	4	1.02	.1	18.8	Managerial & professional occupations	99.4	2.62	1
185	7	22.43	36.59	59.02	39.45	76.03	24.21	.71	2.23	15.69	.63	.68	8.52	1.74	1.12	1.44	.84	.35	June	-1.19	2	2	0	4	-.46	1.3	25.11	Routine & manual occupations	25.2	1.27	1
186	7	18.84	33.25	52.09	41.24	74.49	23.16	.53	1.6	15.14	.47	.48	8.02	2.03	1.53	2.25	1.43	.59	June	-1.19	5	2	1	3	-.64	.5	6.82	Intermediate occupations	47.2	2.4	1
187	7	21.13	36.05	57.18	39.5	75.55	23.94	.66	2	15.57	.59	.6	8.37	2.57	2.17	3.81	3.04	1.07	June	1.81	5	1	0	4	.3	.05	32.78	Intermediate occupations	54.8	2.84	1
188	7	23.16	36.96	60.11	39.38	76.33	24.35	.74	2.37	15.74	.66	.73	8.61	1.95	1.51	2.66	1.67	.57	June	-.79	2	2	1	4	.44	.05	13.82	Managerial & professional occupations	33.6	1.75	0
189	7	23.87	37.53	61.41	38.98	76.52	24.39	.76	2.34	15.78	.68	.71	8.6	2.05	1.54	1.77	1.47	.79	June	4.41	1	2	1	4	-.79	.1	41.35	Routine & manual occupations	81.2	3.21	1
190	7	22.32	36.67	58.99	39.35	76.02	24.17	.71	2.19	15.67	.63	.66	8.5	2.04	1.73	3.69	2.97	.97	June	3.31	2	2	1	4	.95	1.4	41.35	Managerial & professional occupations	44.4	1.68	0
191	7	19.64	34.99	54.63	40.23	75.22	23.76	.62	1.89	15.48	.56	.57	8.28	2.77	2.23	4.23	2.6	.94	June	7.21	2	2	1	4	.55	.05	23.72	Intermediate occupations	74.8	1.88	0
192	7	33.84	42.5	76.34	36.86	79.36	26.08	1.07	3.74	16.5	.96	1.17	9.58	1.44	1.14	2.04	1.39	.42	June	-4.19	5	2	1	4	-.1	2.4	23.41	Intermediate occupations	51	1.92	0
193	7	22.39	36.06	58.45	39.36	75.41	23.89	.64	1.96	15.57	.57	.59	8.33	2.29	2.01	3.44	2.51	1.38	June	-3.09	2	2	1	4	-.5	.05	23.72	Managerial & professional occupations	26.4	1.58	1
194	7	19.39	34.87	54.26	40.2	75.07	23.65	.61	1.82	15.43	.54	.55	8.22	1.91	1.74	4.34	2.83	1.05	June	-.99	2	1	0	2	.3	.05	21.34	Routine & manual occupations	21.6	1.89	0
195	7	20.96	35.59	56.55	39.77	75.37	23.85	.63	1.95	15.53	.57	.59	8.32	2.65	2.09	3.07	2.32	.97	June	2.21	1	2	0	4	1.06	.05	35.04	Inactive	30.6	1.3
196	7	19.96	35.16	55.12	40.08	75.24	23.79	.63	1.9	15.5	.56	.58	8.29	2.45	1.66	2.35	1.19	.69	June	1.81	3	2	0	4	-.17	.3	23.72	Routine & manual occupations	28.2	1.16	0
197	7	22.29	36.31	58.6	39.2	75.5	23.89	.65	1.98	15.54	.58	.6	8.35	1.74	1.35	2.58	1.37	.45	June	-.89	1	2	1	4	.84	.6	23.15	Inactive	83.8	2.48	0
198	8	27.29	39.84	67.13	37.08	76.91	24.95	.85	2.59	16.13	.76	.78	8.83	2.26	1.86	4.07	2.19	.75	November	-.79	2	4	0	2	1.17	.05	24.5	Managerial & professional occupations	50.4	2.97	1
199	8	21.67	36.24	57.92	39.41	75.65	24.17	.67	2.06	15.77	.6	.62	8.4	1.65	1.65	4.37	3.84	2.01	November	-3.39	3	2	0	1	-.24	.05	38.46	Routine & manual occupations	22.4	1.26	0
200	8	24.69	37.16	61.86	38.68	75.85	24.12	.66	2.04	15.73	.59	.62	8.39	1.59	1.46	3.57	2.02	.9	November	-.39	2	4	0	3	1.56	.1	24.51	Managerial & professional occupations	19.2	.91	0
201	8	54.05	52.28	106.33	33.3	85.59	28.37	1.71	5.23	17.68	1.52	1.62	10.68	2.22	1.96	3.57	2.71	1.23	November	-.19	5	4	0	1	1.31	.3	18.31	Inactive	41.8	2.25	1
202	8	22.07	36.66	58.73	39.01	75.67	24.07	.69	2.07	15.64	.61	.63	8.42	1.89	1.82	4.59	2.64	1.8	November	.41	2	4	0	3	.7	.05	24.7	Intermediate occupations	28	1.59	0
203	8	25.88	38.69	64.57	38.48	77.17	24.79	.82	2.56	16.03	.73	.78	8.76	2.48	1.9	2.77	1.71	1.05	November	2.81	3	2	0	2	1.09	.5	29.49	Routine & manual occupations	54	2.5	0
204	8	25.14	38.21	63.35	38.56	76.77	24.72	.79	2.49	16.01	.71	.75	8.71	1.71	1.33	1.55	1.5	.68	November	-7.59	3	2	0	1	.81	.05	33.13	Managerial & professional occupations	18	1.23	0
205	8	34.18	42.04	76.22	36.66	78.7	26.4	1.13	3.84	16.69	1	1.15	9.7	2.9	2.23	3.17	2.51	.96	November	5.61	5	2	0	2	1.06	1.3	32.1	Inactive	72.8	2.23	1
206	8	23.68	36.9	60.58	39	75.9	24.37	.72	2.24	15.84	.64	.68	8.52	1.41	1.2	1.98	1.36	.66	November	-4.49	2	2	1	3	.99	.2	46.25	Routine & manual occupations	29.8	1.42	0
207	8	17.72	31.96	49.67	42.22	74.17	22.91	.49	1.48	14.99	.44	.44	7.93	2.11	1.68	3.3	1.87	.71	November	-3.19	5	4	0	1	.84	1.1	41.71	Unclassified [in work,occ unknown]	20	1.56	0
208	8	26.65	38.62	65.26	38.23	76.84	24.81	.82	2.62	16.03	.73	.81	8.79	2.5	2	3.45	2.09	.93	November	2.01	5	2	0	1	1.09	2.6	24.51	Inactive	90.8	4.14	1
209	8	22.13	36.44	58.57	39.35	75.79	24.19	.68	2.11	15.76	.61	.64	8.43	2.25	1.91	3.86	2.14	.93	November	5.21	3	4	0	4	1.46	.05	33.13	Managerial & professional occupations	53.2	1.64	0
210	8	24.36	36.99	61.35	38.67	75.67	24.06	.66	2.01	15.69	.59	.61	8.37	2.35	2.04	3.3	2.56	1.23	November	-.09	5	4	1	1	1.53	.05	23.81	Managerial & professional occupations	54.2	2.01	0
211	8	21.29	36.14	57.43	39.44	75.58	24.15	.66	2.01	15.77	.59	.61	8.37	2.01	1.85	4.3	2.39	1.14	November	1.31	1	4	1	1	1.53		18.31	Managerial & professional occupations	60.6	2.64	0
212	8	22.32	36.69	59.01	39.22	75.91	24.28	.69	2.13	15.82	.62	.64	8.45	2.33	2.03	3.59	3.04	1.15	November	4.71	5	2	1	3	.41	.05	38.46	Routine & manual occupations	107	3.2	0
213	8	27.9	39.53	67.43	37.96	77.49	25.25	.89	2.93	16.23	.8	.89	9.02	2.52	1.77	2.45	1.48	.64	November	1.61	1	2	1	3	-.06	.2	33.13	Routine & manual occupations	29.2	1.49	1
214	8	22.16	36.44	58.6	39.36	75.8	24.21	.69	2.13	15.76	.61	.64	8.45	1.81	1.13	1.56	.87	.3	November	-1.29	3	2	0	1	-.68	.05	33.13	Managerial & professional occupations	17.6	.94	1
215	8	24.85	37.22	62.07	38.73	75.95	24.38	.72	2.27	15.84	.64	.69	8.54	2.06	1.97	4.24	3	1.73	November	6.31	1	4	1	2	1.49	2.6	46.25	Intermediate occupations	47.2	1.61
216	8	22.56	36.71	59.27	39.23	75.94	24.25	.7	2.15	15.79	.62	.65	8.47	2.61	2.36	3.81	3.33	1.91	November	7.51	2	2	1	3	.62	.4	33.13	Inactive	50.6	1.96	1
217	8	25.1	38.3	63.39	38.45	76.75	24.53	.78	2.34	15.91	.69	.71	8.61	1.4	1.32	1.74	1.83	1.2	November	-7.39	3	4	1	1	.99	.1	21.67	Managerial & professional occupations	49.6	2.89	0
218	8	24.03	36.73	60.75	38.89	75.62	24.08	.66	2.04	15.7	.59	.62	8.38	2.74	2.12	3.28	2.15	1.01	November	-1.39	1	4	0	1	1.42	.3	24.51	Unclassified [in work,occ unknown]	65.8	3.31	1
219	8	24.69	36.91	61.61	38.7	75.61	24.06	.66	2.02	15.7	.59	.61	8.37	2.29	1.49	1.44	1.36	.56	November	-3.89	1	2	0	2	-.35	2.2	24.51	Intermediate occupations	21.2	1.14	1
220	8	19.45	34.69	54.14	40.42	75.11	23.71	.61	1.86	15.47	.54	.56	8.24	2.85	2.51	3.96	2.87	1.66	November	8.71	4	4	0	2	1.42	.05	9.16	Intermediate occupations	94.2	3.39	0
221	9	21.97	36.59	58.56	39.09	75.68	24.05	.68	2.08	15.62	.6	.63	8.43	2	1.68	3.43	1.93	.8	November	-2.89	1	1	0	1	-1.11	2.9	14.19	Routine & manual occupations	56	2.79	1
222	9	24.24	38.08	62.33	38.12	76.2	24.28	.74	2.24	15.73	.66	.67	8.55	2.03	1.7	4.11	2.11	.97	November	-2.29	2	1	1	2	-.97	.2	13.54	Intermediate occupations	24.6	.95	0
223	9	24.67	37.94	62.61	38.41	76.35	24.53	.79	2.4	15.88	.7	.74	8.65	1.24	1.12	2.57	1.51	.72	November	-5.79	1	1	1	1	-1.18	.5	32.53	Intermediate occupations	39.4	2.66	0
224	9	21.88	36.61	58.49	39.03	75.64	23.99	.66	2	15.62	.59	.6	8.38	2.08	1.58	2.38	1.45	.64	November	.61	1	1	1	4	-.86	.4	45.13	Intermediate occupations	22.4	.56	0
225	9	21.85	36.44	58.3	39.15	75.6	24.07	.67	2.03	15.67	.6	.61	8.39	1.51	1.5	3.33	2.15	1.26	November	-3.29	5	1	0	2	-.93	.05	20.18	Inactive	28	1.71	0
226	9	21.77	36.51	58.28	39.11	75.62	24.05	.68	2.05	15.65	.6	.62	8.41	1.98	1.72	2.96	2.03	.98	November	-2.49	3	1	1	2	-1.15	.2	32.53	Routine & manual occupations	28.2	1.45	0
227	9	21.85	36.52	58.38	39.11	75.63	24.07	.68	2.05	15.66	.6	.62	8.41	2.1	1.78	2.98	2.49	.94	November	-2.99	1	1	1	2	-1.11	2.8	32.53	Intermediate occupations	40.8	2.72	1
228	9	24.14	37.65	61.79	38.55	76.2	24.43	.76	2.32	15.83	.68	.71	8.59	2.54	2.21	3.42	3.25	1.3	November	3.61	2	1	0	3	-.82	.1	24.73	Routine & manual occupations	40	1.7	0
229	9	21.88	36.52	58.4	39.08	75.6	24.04	.68	2.04	15.64	.6	.62	8.4	2.16	1.76	3.47	1.86	.8	November	4.71	4	1	0	2	-.93	.05	19.69	Managerial & professional occupations	86.8	2.9	0
230	9	23.48	37.32	60.8	38.86	76.18	24.36	.72	2.21	15.84	.64	.67	8.52	.92	.86	1.3	1.05	.55	November	-6.79	2	1	1	1	-1.07	.2	37.6	Routine & manual occupations	24	1.28	0
231	9	21.87	36.41	58.28	39.24	75.65	24.18	.68	2.06	15.76	.61	.62	8.42	1.9	1.71	3.99	2.57	1.07	November	3.11	2	1	0	2	-.93	.05	18.6	Managerial & professional occupations	99.8	5.08	0
232	9	22.43	36.78	59.21	39	75.78	24.17	.7	2.11	15.72	.62	.64	8.45	2.37	1.79	3.1	1.67	.66	November	-1.39	5	1	0	4	-.79	2.8	32.53	Managerial & professional occupations	25.2	.92	0
233	9	21.65	36.33	57.98	39.21	75.54	24.03	.66	2.01	15.65	.59	.61	8.38	2.13	1.84	3.71	2.28	.92	November	4.21	2	1	0	4	-.89	.5	17.15	Routine & manual occupations	37.6	1.41	1
234	9	22.79	37.01	59.8	38.94	75.95	24.27	.71	2.23	15.74	.63	.68	8.53	1.86	1.53	2.9	1.6	.71	November	.51	1	1	1	2	-.82	.1	20.18	Managerial & professional occupations	27.2	1.18
235	9	21.7	36.36	58.06	39.19	75.55	24.04	.67	2.01	15.65	.59	.61	8.38	1.85	1.64	3.52	1.87	.8	November	-1.79	2	1	1	2	-.93	.7	17.15	Intermediate occupations	31.6	1.95	0
236	9	21.65	36.57	58.22	39.01	75.57	23.95	.67	2	15.57	.6	.6	8.37	2.29	2.22	4.27	3.2	1.52	November	3.71	5	1	0	2	-1.07	.05	13.73	Intermediate occupations	21.2	.82	0
237	9	21.63	36.41	58.05	39.13	75.54	23.98	.67	2	15.6	.6	.6	8.38	2.51	2.08	3.91	2.14	1.05	November	-1.09	1	1	0	3	-1.11	.05	19.69	Managerial & professional occupations	41.4	2.11	0
238	9	21.81	36.44	58.25	39.18	75.62	24.07	.67	2.05	15.66	.6	.62	8.41	2.13	1.97	4.61	3.43	1.39	November	6.71	2	1	1	1	-.82	.5	20.18	Routine & manual occupations	77.2	2.45	1
239	9	22.72	36.91	59.63	39	75.92	24.23	.7	2.13	15.76	.62	.65	8.46	1.94	1.68	3.41	1.95	.8	November	-.59	5	1	0	3	-1.07	.1	21.67	Managerial & professional occupations	25.2	1.93	1
240	9	21.73	36.51	58.24	39.11	75.62	23.98	.67	2.03	15.58	.6	.61	8.39	2.4	1.99	3.01	2	1.07	November	3.21	5	1	0	1	-1.04	.05	19.69	Inactive	68.4	2.95	0
241	10	26.16	37.47	63.63	38.33	75.8	24.3	.69	2.14	15.85	.62	.65	8.46	1.75	1.65	2.96	2.27	1.35	January	-2.49	3	1	1	3	-1.62	.05	13.77	Intermediate occupations	29.8	1.79	0
242	10	25.2	37.53	62.72	38.51	76.04	24.24	.71	2.22	15.72	.63	.67	8.52	2.33	1.87	4.64	2.39	.6	January	-1.79	2	1	1	2	-2.01	.05	30.94	Intermediate occupations	34.8	1.44	0
243	10	18.63	34	52.63	40.9	74.9	23.51	.58	1.79	15.34	.52	.54	8.17	2.06	1.58	3.59	2.18	.52	January	-4.59	3	1	0	4	-1.83	.05	10.43	Managerial & professional occupations	23	1.5	0
244	10	24.12	37.43	61.54	39.11	76.54	24.61	.76	2.56	15.86	.68	.77	8.75	3	2.16	3.19	1.87	.73	January	3.31	1	1	1	3	-1.83	.3	22.2	Routine & manual occupations	106.2	5.7
245	10	20.89	35.83	56.72	39.59	75.42	24.05	.65	1.96	15.72	.58	.59	8.33	1.81	1.58	3.46	1.87	.85	January	.91	2	1	0	3	-1.83	.05	38.46	Managerial & professional occupations	27.6	1.63	0
246	10	24.19	37.03	61.23	38.85	75.89	24.25	.7	2.11	15.81	.62	.64	8.44	2.36	2.11	3.62	3.02	1.5	January	-1.09	4	1	1	2	-2.01	.7	25.15	Routine & manual occupations	43.8	2.1	0
247	10	23.22	37.36	60.59	38.67	76.03	24.28	.73	2.19	15.77	.65	.66	8.51	2.13	2.01	4.32	3.36	1.52	January	-2.19	3	1	0	2	-1.8	.1	21.63	Routine & manual occupations	27	1.63	0
248	10	26.24	38.17	64.41	38.38	76.56	24.82	.81	2.6	16.04	.72	.8	8.78	2.12	1.94	4.58	3.65	1.44	January	-3.49	1	1	0	3	-1.73	.05	46.25	Unclassified [in work,occ unknown]	33.6	1.79	0
249	10	20.81	35.14	55.95	39.94	75.08	24.12	.61	1.86	15.89	.55	.56	8.23	2.11	1.85	3.66	2.38	1.04	January	1.21	3	1	0	1	-1.69		28.67	Intermediate occupations	60.6	3.11	0
250	10	19.13	34.01	53.14	41.07	75.08	23.65	.6	1.87	15.43	.54	.57	8.22	2	1.94	3.23	2.81	2.05	January	6.71	5	1	1	4	-2.01	.05	18.68	Managerial & professional occupations	39.2	1.13	0
251	10	23.79	36.78	60.56	38.95	75.73	24.27	.68	2.1	15.84	.61	.63	8.43	2.11	1.96	4.26	2.85	1.45	January	1.91	1	1	1	2	-1.58	1.2	18.94	Managerial & professional occupations	45.6	1.79	1
252	10	19.14	31.43	50.57	42.76	74.19	22.8	.45	1.43	14.89	.4	.42	7.91	1.96	1.86	3.63	3.02	1.69	January	-4.89	5	1	1	1	-2.05	.05	48.34	Inactive	33.6	1.96	0
253	10	40.44	45.67	86.11	35.53	81.2	27.15	1.27	4.43	17.07	1.13	1.39	10.07	1.97	1.79	4	2.91	1.19	January	-4.19	4	1	1	4	-2.01	.05	18.31	Routine & manual occupations	48.6	2.48	0
254	10	46.84	49.12	95.96	34.23	83.35	27.49	1.36	4.78	17.11	1.21	1.42	10.37	1.94	1.8	4.21	3.29	1.47	January	-2.49	4	1	0	2	-1.65	.05	19.33	Managerial & professional occupations	38.8	1.55	0
255	10	25.87	37.72	63.59	38.67	76.39	24.33	.75	2.34	15.75	.67	.7	8.58	2.12	1.87	3.56	2.48	1.19	January	-2.79	1	1	1	4	-1.58	2.2	14.46	Managerial & professional occupations	29.2	.93	1
256	10	21.59	35.62	57.21	39.85	75.46	23.84	.65	2	15.51	.58	.61	8.33	1.84	1.61	4.77	2.21	.81	January	.61	2	1	0	3	-1.76	.05	16.17	Managerial & professional occupations	54.8	2.1
257	11	22.09	36.59	58.68	39.13	75.72	24.12	.68	2.08	15.69	.61	.63	8.43	2.25	1.8	3.51	1.92	.66	January	1.81	2	4	1	3	.48	.05	20.18	Managerial & professional occupations	54.8	2.44	1
258	11	21.1	36.16	57.25	39.34	75.49	23.88	.66	1.97	15.54	.59	.59	8.34	2.12	1.75	3.15	1.95	.87	January	-1.59	5	2	1	4	1.31	.05	20.56	Intermediate occupations	45.4	1.9	0
259	11	21.6	36.31	57.91	39.4	75.71	24.03	.68	2.07	15.61	.6	.63	8.41	2.34	2.18	4.23	3.67	1.7	January	5.71	3	4	1	3	.66	.05	32.78	Inactive	53	1.46	0
260	11	22.26	36.69	58.95	39.21	75.9	24.14	.7	2.18	15.65	.62	.66	8.49	2.11	1.86	2.46	2.06	1.23	January	2.91	3	4	1	4	.73	.05	14.38	Inactive	51.8	1.83	0
261	11	22.45	36.96	59.4	38.99	75.95	24.14	.7	2.19	15.64	.63	.66	8.5	1.8	1.74	3.6	2.75	1.31	January	4.51	1	2	1	3	1.24	.05	20.56	Managerial & professional occupations	65.8	2.34	1
262	11	22.47	37.05	59.52	38.87	75.92	24.15	.71	2.16	15.67	.63	.65	8.48	1.89	1.58	2.63	1.95	.87	January	-8.09	2	2	0	1	.37	.05	25.87	Intermediate occupations	45.8	3.52	0
263	11	21.69	36.51	58.2	39.17	75.67	23.99	.68	2.05	15.58	.6	.62	8.4	2.03	1.56	2.23	1.53	.79	January	-3.19	1	2	0	1	.7	.05	20.56	Routine & manual occupations	30	2.16	0
264	11	24.79	38	62.79	38.66	76.67	24.63	.77	2.45	15.96	.69	.74	8.68	2.93	2.57	3.11	2.38	1.86	January	1.91	1	2	0	2	.19	2.4	24.51	Unclassified [in work,occ unknown]	25.4	1.12	0
265	11	21.98	36.62	58.6	39.14	75.77	24.12	.69	2.15	15.65	.62	.65	8.47	2.22	1.74	3.16	1.56	.63	January	1.91	1	4	0	4	.73	.05	14.19	Inactive	40	1.43	0
266	11	21.83	36.43	58.26	39.17	75.6	24.06	.67	2.03	15.67	.6	.61	8.39	2.04	1.87	3.57	2.74	1.38	January	.81	1	2	0	1	.19	.4	20.18	Routine & manual occupations	46.8	1.88	1
267	11	21.85	36.47	58.31	39.33	75.79	24.06	.68	2.13	15.61	.61	.64	8.46	1.66	1.49	4.08	2.21	.75	January	-5.29	2	2	0	1	1.06	.05	14.38	Managerial & professional occupations	22.2	1.57	1
268	11	17.39	32.77	50.16	41.72	74.49	23.16	.53	1.61	15.13	.47	.49	8.03	1.67	1.32	1.93	1.66	.51	January	-6.29	1	2	1	3	.81	1.2	7.21	Managerial & professional occupations	35.2	2.64	1
269	11	23.49	37.53	61.02	38.84	76.37	24.32	.74	2.32	15.72	.66	.7	8.59	2.18	1.89	3.89	2.31	1.01	January	4.91	5	4	0	1	.66	.05	14.38	Managerial & professional occupations	56.6	1.92	1
270	11	21.23	36.19	57.41	39.4	75.59	24	.66	2.02	15.61	.59	.61	8.38	2.26	1.88	3.4	2.16	.96	January	2.91	1	2	0	4	1.35	.05	11.82	Managerial & professional occupations	20.6	1.33	0
271	11	22.08	36.72	58.8	39.17	75.89	24.11	.69	2.18	15.62	.62	.65	8.49	2.22	2.03	5	4.15	1.44	January	4.41	3	4	0	2	-.03	.2	17.22	Managerial & professional occupations	76.4	3.56	0
272	11	23.03	37.47	60.49	38.52	75.98	24.21	.73	2.2	15.69	.65	.66	8.52	2.28	1.93	3.38	2.12	1.07	January	2.51	5	2	0	2	-.1	.05	25.46	Routine & manual occupations	44.2	2.22	0
273	11	25.94	39.15	65.1	38.28	77.43	24.64	.79	2.49	15.9	.71	.74	8.75	2.46	1.92	3.85	2.51	.45	January	-3.09	1	4	0	1	.37	.05	21.67	Managerial & professional occupations	24	1.08	1
274	11	21.66	36.41	58.06	39.35	75.75	24.04	.68	2.11	15.59	.6	.63	8.45	2.12	1.65	2.93	1.84	.52	January	-1.09	5	4	0	2	.34	1.8	23.15	Routine & manual occupations	51.4	2.03	0
275	11	24.04	37.78	61.82	38.59	76.37	24.42	.75	2.41	15.76	.67	.73	8.65	1.98	1.71	3.13	2.12	.96	January	-.39	1	4	0	1	.7	.1	14.19	Inactive	73.6	3.61	0
276	11	31.06	42.33	73.39	36.78	79.11	25.34	.99	3.05	16.21	.88	.92	9.13	1.91	1.5	2.43	1.67	.54	January	-3.19	1	2	1	1	.84	3.9	18.94	Inactive	74.2	3.05	1
277	11	21.71	36.51	58.22	39.15	75.67	23.98	.68	2.04	15.59	.6	.61	8.4	1.95	1.63	2.41	2.13	.86	January	-.39	2	4	0	1	.41	.05	20.56	Managerial & professional occupations	22.4	1	0
278	11	16.9	31.02	47.92	42.93	73.95	22.75	.46	1.38	14.89	.41	.41	7.86	1.76	1.63	3.14	2.71	1.33	January	-1.49	1	2	1	1	1.09	.2	35.14	Inactive	101.6	3.49	0
279	11	22.88	37.05	59.93	39.13	76.18	24.29	.72	2.3	15.7	.64	.69	8.59	1.6	1.46	2.44	1.86	.96	January	-1.39	2	2	1	2	1.09	.05	23.15	Inactive	18.6	1.35	1
280	11	23.01	37.04	60.06	38.95	76	24.27	.7	2.12	15.81	.63	.64	8.46	2.25	1.93	3.64	2.62	.98	January	-1.89	5	4	0	2	.15	1	37.6	Routine & manual occupations	22.6	1.09	1
281	11	22.85	37.03	59.89	38.96	75.99	24.28	.71	2.21	15.76	.63	.67	8.52	1.7	1.33	3.18	1.58	.74	January	-5.39	2	4	0	3	.26	.4	20.18	Managerial & professional occupations	20.2	1.6	1
282	11	19.87	35.15	55.02	40.03	75.18	23.71	.62	1.86	15.46	.55	.56	8.25	1.89	1.65	3.23	2.15	1.01	January	1.71	2	4	1	3	.7	.1	23.41	Inactive	70.8	2.69	0
283	11	21.68	36.48	58.17	39.26	75.74	24.02	.68	2.09	15.59	.61	.63	8.43	1.81	1.64	2.61	1.91	1.17	January	3.31	1	2	1	1	1.64	.5	17.22	Intermediate occupations	39.2	1.26	1
284	11	34.41	42.74	77.15	36.78	79.52	26.16	1.09	3.81	16.53	.97	1.19	9.63	1.85	1.68	3.25	2.44	1.21	January	.71	5	2	1	2	1.24	.05	23.41	Inactive	39	1.63	1
285	12	22.11	36.5	58.62	39.24	75.74	24.11	.68	2.06	15.7	.6	.62	8.41	1.91	1.5	2.36	1.35	.56	October	-.99	5	2	0	1	-.68	.1	20.25	Intermediate occupations	26.2	1.82	1
286	12	24.21	36.93	61.13	38.7	75.63	24.03	.66	2	15.67	.59	.61	8.36	2.09	1.54	2.35	1.41	.65	October	-3.19	1	2	0	2	-1.4	.05	23.81	Managerial & professional occupations	46.4	3.09	1
287	12	22.41	36.56	58.98	39.2	75.76	24.1	.68	2.11	15.66	.61	.64	8.44	1.28	1.2	2.2	1.5	.78	October	-4.99	2	2	0	1	-.03	.2	30.94	Inactive	19.2	1.76	1
288	12	32.75	42.24	74.99	36.65	78.89	26.13	1.03	3.77	16.52	.91	1.18	9.61	1.7	1.64	2.76	2.18	1.39	October	-2.49	1	2	0	1	-.46	.05	11.82	Intermediate occupations	14.8	.83	1
289	12	21.28	36.08	57.36	39.47	75.55	23.96	.67	2.01	15.59	.59	.61	8.37	1.98	1.3	1.5	1.11	.61	October	-.39	5	2	1	3	.05	.05	32.78	Managerial & professional occupations	65.9	2.58	1
290	12	23.41	36.63	60.04	38.97	75.6	23.98	.66	2.03	15.61	.59	.61	8.38	1.32	1.16	1.87	1.83	.72	October	-5.59	1	4	1	1	.12	1.6	30.94	Routine & manual occupations	48.2	2.76	1
291	12	25.5	38.16	63.66	38.47	76.63	24.62	.77	2.54	15.88	.69	.77	8.74	1.66	1.3	2.04	1.39	.54	October	-3.99	5	4	1	1	-.03	.7	23.81	Managerial & professional occupations	36.4	2.02	1
292	12	21.49	36.13	57.62	39.41	75.54	23.98	.66	1.99	15.62	.59	.6	8.36	1.92	1.45	2.6	1.46	.48	October	-2.09	2	4	0	1	.05	.4	23.81	Intermediate occupations	24.4	1.74	1
293	12	21.43	36.02	57.45	39.68	75.7	24.03	.68	2.09	15.61	.6	.64	8.42	1.86	1.32	1.98	1.13	.51	October	-4.89	5	2	0	2	-1.18	3.5	24.24	Intermediate occupations	15.2	1.44	0
294	12	22.41	36.31	58.72	39.22	75.53	23.86	.65	1.98	15.52	.58	.6	8.34	1.52	1.36	1.88	1.69	.9	October	-2.59	2	4	1	1	.19	.05	43.01	Managerial & professional occupations	25.6	.92	0
295	12	23.52	36.61	60.13	39.1	75.7	24.03	.66	2.09	15.62	.59	.63	8.41	1.86	1.44	2.39	1.49	.58	October	-4.49	1	4	0	1	.05	3.7	35.04	Intermediate occupations	28.2	1.85	1
296	12	25.35	37.44	62.79	38.5	75.94	24.23	.69	2.15	15.77	.61	.65	8.46	1.63	1.37	2.58	1.47	.74	October	1.01	2	4	1	2	.19	.05	23.81	Routine & manual occupations	70	2.71	0
297	12	20.91	35.83	56.75	39.72	75.56	23.93	.66	2	15.57	.59	.61	8.36	1.82	1.72	2.79	2.09	1.42	October	-.39	5	2	1	2	-.53	.2	41.35	Intermediate occupations	41	2.72	0
298	12	26.89	38.42	65.31	38.34	76.76	24.73	.9	2.57	15.97	.8	.79	8.77	1.73	1.3	2.12	1.34	.53	October	-1.29	2	4	0	1	.12	.05	23.72	Unclassified [in work,occ unknown]	55.6	2.65	0
299	12	22.33	36.75	59.08	39.18	75.93	24.17	.7	2.2	15.66	.62	.66	8.5	1.34	1.12	2.37	1.29	.52	October	-1.19	2	4	0	2	.12	.05	15.2	Intermediate occupations	20.6	1.34	0
300	12	21.63	36.23	57.85	39.39	75.62	24.02	.67	2.05	15.62	.6	.62	8.4	1.74	1.39	2.29	1.36	.71	October	-.99	2	4	1	1	.19	.05	20.25	Intermediate occupations	53.2	2.42	0
301	12	24.24	36.92	61.16	38.7	75.63	24.03	.66	2.01	15.66	.59	.61	8.37	1.9	1.42	2.3	1.3	.55	October	-.09	1	2	1	2	-.89	.05	30.94	Managerial & professional occupations	40.2	2.01	1
302	12	22.68	36.57	59.25	39.09	75.66	24.07	.67	2.03	15.69	.59	.61	8.38	1.74	1.39	1.85	1.51	.73	October	-1.79	5	4	0	1	.12	.1	23.81	Intermediate occupations	34.6	1.87	0
303	12	23.28	37.32	60.6	38.69	76	24.31	.73	2.27	15.75	.65	.69	8.56	1.87	1.57	2.57	1.88	.79	October	2.71	2	4	0	2	.05	.05	24.7	Routine & manual occupations	22.2	1.5	0
304	12	22.15	36.67	58.81	39.14	75.8	24.17	.68	2.09	15.72	.61	.63	8.44	2.19	1.63	2.01	1.97	.63	October	3.21	5	4	0	3	.12	.05	21.13	Managerial & professional occupations	38.6	1.35	1
305	12	26.03	38.65	64.68	38.38	77.02	24.88	.81	2.66	16.05	.73	.81	8.83	1.77	1.6	3.8	2.29	.99	October	-1.59	2	2	0	1	-.1	.8	24.51	Managerial & professional occupations	22	1.53	1
306	12	21.65	36.24	57.9	39.37	75.62	24.03	.68	2.06	15.63	.61	.62	8.4	1.99	1.52	1.9	1.36	.56	October	-2.29	2	4	1	2	.19	.05	20.25	Intermediate occupations	33.2	2.03	0
307	12	21.49	36.13	57.62	39.41	75.54	23.98	.66	1.99	15.62	.59	.6	8.36	2.2	1.71	2.94	1.67	.61	October	1.31	2	4	0	1	.05	.6	23.81	Routine & manual occupations	34.2	2.01	0
308	12	25.75	38.97	64.72	38.32	77.29	24.63	.79	2.48	15.9	.7	.74	8.73	1.74	1.54	2.2	1.85	1.25	October	1.41	2	2	1	1	-.03	.05	21.67	Routine & manual occupations	30.8	1.62	0
309	12	23.25	36.73	59.98	38.96	75.7	24.09	.66	2.02	15.71	.59	.61	8.38	1.55	1.19	1.48	.69	.56	October	-5.99	3	4	1	3	.19	.1	23.81	Intermediate occupations	22	1.67	0
310	12	15.68	31.02	46.7	43.01	74.03	22.83	.47	1.43	14.94	.42	.43	7.88	1.91	1.63	2.4	2	.95	October	-1.79	2	2	0	2	.05	.05	37.66	Managerial & professional occupations	17	1.34	1
311	12	25.35	37.44	62.79	38.5	75.94	24.23	.69	2.15	15.77	.61	.65	8.46	1.34	1.18	2.23	1.39	.68	October	1.91	2	2	1	2	-.82	.05	23.81	Inactive	60.8	2.34	0
312	12	42.17	47.4	89.56	34.77	82.16	26.51	1.33	3.79	16.85	1.18	1.18	9.66	1.99	1.63	3.02	1.64	.61	October	2.01	2	4	0	1	.05	.05	21.67	Intermediate occupations	24	1.25	1
313	12	22.61	36.68	59.29	39.12	75.79	24.15	.67	2.06	15.74	.6	.62	8.4	1.47	1.45	2.18	2.04	1.27	October	3.41	5	2	1	1	-.24	.7	23.81	Inactive	42.8	1.74	0
314	12	20.74	35.71	56.45	39.75	75.47	23.88	.65	1.98	15.54	.58	.6	8.34	2.45	1.79	2.05	1.61	.85	October	2.81	2	2	0	3	-.39	4.6	23.41	Routine & manual occupations	64.9	2.6	1
315	12	21.71	36.24	57.95	39.37	75.61	24.01	.67	2.04	15.62	.59	.62	8.39	1.26	.98	1.59	1.22	.24	October	-4.09	2	4	1	1	.12		30.94	Intermediate occupations	31.8	1.94	0
316	12	21.27	36.25	57.52	39.42	75.66	24	.66	2.03	15.61	.59	.61	8.39	1.72	1.36	1.41	1.26	.82	October	-1.49	1	4	0	2	.05	2.9	11.82	Routine & manual occupations	40.4	1.77	1
317	12	26.03	38.65	64.68	38.38	77.02	24.88	.81	2.66	16.05	.73	.81	8.83	1.6	1.58	2.92	2.34	1.35	October	-2.09	1	2	1	2	-.32	1.4	24.51	Intermediate occupations	45.4	2.14	1
318	13	24.23	38.29	62.53	37.97	76.26	24.29	.74	2.27	15.74	.66	.68	8.55	1.54	1.44	3.44	2.08	1.09	November	-4.89	3	3	0	1	-1.36	.05	21.43	Intermediate occupations	83.4	3.01	1
319	13	20.37	35.58	55.96	39.8	75.38	23.65	.6	1.89	15.4	.54	.57	8.25	1.84	1.83	3.63	2.4	1.4	November	2.51	3	2	1	3	-1.04	.05	34.5	Intermediate occupations	61.6	1.92	0
320	13	22.74	36.16	58.91	39.22	75.39	23.67	.61	1.91	15.41	.54	.58	8.27	1.62	1.53	2.76	2.64	1.14	November	-1.19	3	2	1	1	-1.15	.05	17.9	Managerial & professional occupations	28.4		0
321	13	23.35	36.58	59.93	38.99	75.58	23.72	.6	1.87	15.48	.54	.56	8.24	1.68	1.53	2.76	1.98	1.09	November	-3.49	3	3	0	3	-1.29	.05	16.48	Routine & manual occupations	96.6	4.23	0
322	13	22.72	36.13	58.86	39.34	75.48	23.59	.58	1.82	15.39	.52	.55	8.2	1.99	1.88	4.4	2.76	1.32	November	4.81	3	3	1	3	-1.4	.05	17.58	Intermediate occupations	110.8	2.81	0
323	13	19.62	35.01	54.62	40.08	75.09	23.46	.57	1.75	15.31	.51	.53	8.15	1.87	1.66	3.05	1.99	1.1	November	-.39	1	2	0	1	-1.04	.05	15.76	Routine & manual occupations	46.4	2.44	1
324	13	68.14	59.78	127.93	29.04	88.83	30.06	2.04	6.45	18.37	1.82	1.88	11.69	1.85	1.74	3.86	2.48	1.14	November	-.09	3	3	0	1	-1.22	.05	49.84	Routine & manual occupations	39.2	1.19	0
325	13	21.77	35.45	57.23	39.61	75.06	23.4	.56	1.72	15.28	.5	.52	8.12	2.4	2.13	3.9	2.83	1.03	November	.41	5	3	0	3	-1.18	.05	17.58	Managerial & professional occupations	71.6	1.8	0
326	13	22.03	35.51	57.54	39.54	75.05	23.39	.55	1.7	15.28	.49	.51	8.11	2.2	2.12	4.61	3.64	1.82	November	4.11	5	2	1	1	-1	.2	15.76	Managerial & professional occupations	74	2.4	0
327	13	22.52	35.68	58.2	39.47	75.15	23.39	.55	1.69	15.29	.49	.51	8.1	1.99	1.74	3.92	2.11	.95	November	-3.89	3	2	0	1	-1.15	.05	13.85	Managerial & professional occupations	50.6		0
328	13	25.94	37.98	63.92	38.63	76.61	24.42	.74	2.58	15.71	.66	.82	8.71	1.96	1.42	1.8	1.46	.46	November	.31	4	2	1	2	-1.07	.05	18.29	Managerial & professional occupations	91.2	3.31	0
329	13	21.76	35.64	57.39	39.59	75.23	23.49	.57	1.77	15.33	.51	.53	8.16	1.62	1.52	2.95	1.96	1.04	November	-8.29	3	3	0	2	-1.36	.05	17.58	Intermediate occupations	90	2.53	0
330	13	22.51	36.07	58.57	39.3	75.36	23.65	.6	1.9	15.4	.54	.57	8.25	1.66	1.47	3.31	2.04	.85	November	-1.49	3	2	1	2	-1.04	.05	17.9	Managerial & professional occupations	71.6	3.18	0
331	13	23.01	36.37	59.39	39.23	75.6	23.76	.63	1.98	15.45	.56	.6	8.31	1.89	1.51	1.89	1.58	.89	November	-7.59	3	2	0	1	-1.18	.1	17.58	Intermediate occupations	38.4	.35	0
332	13	25.41	38.34	63.75	37.93	76.28	24.31	.72	2.24	15.78	.65	.67	8.53	2.28	1.93	4.45	2.48	.93	November	1.81	2	2	0	2	-1.18	.1	27.12	Managerial & professional occupations	23.6		0
333	13	23.71	36.26	59.98	39.12	75.38	23.52	.57	1.76	15.36	.51	.53	8.16	2.46	2	3.63	2.15	.9	November	4.01	3	2	0	2	-1.04	.05	17.58	Managerial & professional occupations	57.6	2.15	0
334	13	25.39	37.81	63.2	38.76	76.57	24.39	.74	2.55	15.7	.66	.8	8.69	2.04	1.74	3.99	2.66	.59	November	2.01	1	2	1	3	-1.26	.3	18.29	Managerial & professional occupations	48.4	.97	1
335	13	20.1	35.38	55.48	39.9	75.28	23.57	.59	1.83	15.36	.53	.55	8.21	2.08	1.87	3.81	2.64	1.2	November	1.81	5	3	1	3	-1.33	.05	26.43	Intermediate occupations	111.4	3.03	1
336	13	30.68	40.26	70.94	37.4	77.67	25.49	.93	3.4	16.17	.83	1.04	9.32	2.03	1.83	3.94	2.63	1.19	November	.51	3	2	0	1	-1.15	.05	16.48	Routine & manual occupations	100.6		1
337	13	21.59	35.38	56.97	39.73	75.1	23.38	.55	1.7	15.27	.49	.51	8.11	1.82	1.51	3.51	1.89	.58	November	-2.79	3	2	1	1	-1.18	.05	13.85	Managerial & professional occupations	50	1.28	0
338	13	32.96	40.93	73.9	36.93	77.87	25.64	.96	3.52	16.23	.85	1.08	9.41	2.25	2.09	4.52	2.87	1.44	November	5.91	2	3	0	2	-1.18	.05	17.9	Routine & manual occupations	74.6	4.97	0
339	13	21.13	35.28	56.41	39.86	75.14	23.54	.59	1.87	15.31	.53	.57	8.23	2.05	2.05	3.22	3.5	2.73	November	6.11	3	3	0	3	-1.51	.05	20.91	Routine & manual occupations	56	1.67	0
340	13	23.47	36.24	59.71	39.08	75.32	23.6	.59	1.85	15.38	.53	.56	8.22	2.06	1.92	3.39	2.48	1.37	November	3.01	3	2	0	3	-1	.05	17.58	Managerial & professional occupations	78.6	2.69	0
341	13	21.55	35.58	57.13	39.59	75.17	23.5	.58	1.79	15.33	.52	.54	8.18	1.96	1.56	2.87	1.47	.72	November	-1.89	5	2	1	1	-1.22	.05	17.58	Routine & manual occupations	34.4	1.22	0
342	13	22.68	36.17	58.85	39.24	75.41	23.7	.61	1.93	15.42	.54	.58	8.28	2	1.86	3.8	3.04	1.59	November	1.21	3	2	0	2	-1	.05	17.9	Managerial & professional occupations	32.2	1.33	0
343	13	24	36.35	60.35	39.06	75.41	23.49	.55	1.7	15.37	.49	.51	8.12	2.81	2.3	3.34	2.4	1.27	November	-3.69	2	2	0	3	-1.22	.05	15.76	Routine & manual occupations	39.2	2.13
344	13	22.72	36.13	58.86	39.34	75.48	23.59	.58	1.82	15.39	.52	.55	8.2	2.4	2.07	3.21	2.58	1.49	November	3.71	2	3	1	1	-1.98	.05	17.58	Routine & manual occupations	64.8	2.09	1
345	13	22.95	35.93	58.87	39.42	75.34	23.58	.6	1.87	15.35	.54	.57	8.23	1.59	1.5	2.21	2.21	1.32	November	-3.39	2	2	1	1	-1.18	.05	22.28	Unclassified [in work,occ unknown]	29		0
346	13	23.49	38.07	61.56	38.43	76.5	24.21	.73	2.26	15.67	.65	.68	8.54	1.52	1.5	3.18	3.04	1.4	November	-8.99	3	2	1	3	-1.18	.05	20.91	Intermediate occupations	36.6	.31	0
347	13	25.53	37.89	63.42	38.72	76.61	24.42	.74	2.58	15.71	.66	.82	8.71	1.78	1.77	2.82	2.67	1.39	November	-.29	3	3	0	3	-1.26	.05	18.29	Managerial & professional occupations	53.6	1.48	0
348	13	21.25	35.55	56.8	39.6	75.15	23.5	.58	1.77	15.34	.51	.53	8.16	1.68	1.56	3.05	2.48	1.15	November	-1.99	3	3	1	1	-1.36	.05	18.29	Managerial & professional occupations	52.2	1.56	0
349	13	22.61	35.72	58.33	39.42	75.14	23.4	.55	1.7	15.3	.49	.51	8.11	1.72	1.53	4.09	2.04	.83	November	-.49	2	2	0	2	-1.18	.05	13.85	Managerial & professional occupations	75.2		0
350	13	21.23	35.46	56.69	39.66	75.12	23.48	.58	1.78	15.31	.52	.54	8.17	2.01	1.72	3.79	1.93	.9	November	-2.19	3	3	0	1	-1.22	.1	13.66	Managerial & professional occupations	69.8	2.15	1
351	13	21.8	35.45	57.25	39.7	75.15	23.38	.55	1.69	15.29	.49	.51	8.1	2.64	2.22	3.63	2.35	1.15	November	1.11	2	3	0	1	-1.33	.05	13.85	Managerial & professional occupations	119.2	5.03	0
352	13	23.21	36.12	59.32	39.25	75.37	23.51	.57	1.76	15.36	.51	.53	8.16	1.35	1.21	1.27	1.3	.91	November	-3.79	5	3	1	1	-1.44	.05	17.58	Inactive	26	.98	0
353	13	19.62	35.01	54.64	40.08	75.09	23.46	.57	1.76	15.31	.51	.53	8.15	1.43	1.35	2.05	1.49	1.12	November	-4.59	2	3	1	1	-1.26	.05	15.76	Managerial & professional occupations	59.4	2.91	0
354	14	24.95	37.49	62.44	38.82	76.31	24.01	.71	2.18	15.55	.64	.66	8.46	2.07	1.75	3.18	2.12	.92	November	-1.09	4	3	0	1	-.57	.05	22.47	Managerial & professional occupations	112.8	3.92	0
355	14	22.32	36.47	58.79	39.06	75.53	23.78	.64	1.96	15.47	.57	.59	8.31	1.66	1.46	2.69	1.91	.79	November	-1.49	3	1	1	3	-.17	.05	17.89	Managerial & professional occupations	43.4	1.68	0
356	14	26.23	38.67	64.9	38.2	76.87	24.5	.78	2.57	15.77	.69	.78	8.73	2.17	1.85	3.99	2.19	1.06	November	.41	2	3	0	3	-.71	.05	16.89	Intermediate occupations	32.6	.75	0
357	14	22.83	36.26	59.09	39.16	75.42	23.68	.62	1.91	15.42	.56	.57	8.27	2.24	1.9	3.23	2.12	.91	November	-1.19	3	1	0	1	-.17	.05	17.93	Managerial & professional occupations	20.8	.78	0
358	14	29.21	40.06	69.27	37.34	77.39	24.99	.86	2.82	16.08	.77	.87	8.91	1.94	1.47	2.18	1.57	.64	November	-4.09	1	1	1	2	-.46	.2	13.25	Managerial & professional occupations	30.4	1.6	1
359	14	29.96	40.34	70.29	37.44	77.78	24.77	.84	2.69	15.94	.75	.82	8.83	1.4	.85	.78	.58	.45	November	-5.89	2	1	0	3	-.5	.3	19.18	Managerial & professional occupations	30		1
360	14	23.46	36.95	60.41	38.93	75.88	23.93	.68	2.1	15.53	.6	.63	8.4	1.54	1.24	3.7	1.59	1.21	November	-6.09	2	1	0	2	-.1	.05	16.89	Managerial & professional occupations	26	1.17	1
361	14	21.74	35.56	57.3	39.9	75.46	23.58	.61	1.89	15.33	.54	.57	8.25	1.2	1.14	1.65	1.5	.85	November	-5.29	3	2	1	2	.34	.05	18.52	Routine & manual occupations	37		1
362	14	22.33	36.44	58.77	39.07	75.5	23.75	.64	1.94	15.46	.57	.58	8.3	1.92	1.6	2.95	1.7	.84	November	-2.29	2	3	1	1	-.6	.05	17.89	Managerial & professional occupations	57.4	1.73	1
363	14	23.13	36.41	59.54	39.07	75.49	23.72	.63	1.93	15.44	.56	.58	8.28	1.64	1.33	2.38	1.47	.61	November	-8.09	3	1	0	2	-.53	.05	16.89	Managerial & professional occupations	23.6		0
364	14	17.8	32.64	50.44	41.82	74.46	23	.48	1.5	15.06	.43	.45	7.94	1.76	1.51	3.06	1.7	.79	November	2.21	2	3	0	3	-.79	.2	22.53	Inactive	128.4	4.93	0
365	14	24.41	37.05	61.45	38.88	75.93	23.93	.67	2.13	15.52	.6	.65	8.41	1.67	1.42	3.08	2.01	.7	November	-6.49	3	1	1	1	-.13	.05	26.04	Intermediate occupations	37.2	.73	1
366	14	24.08	36.58	60.66	38.93	75.51	23.72	.63	1.94	15.44	.56	.59	8.29	2.59	1.95	3.4	1.85	.68	November	-.29	3	1	0	3	-.06	.4	21.75	Inactive	40.4	1.91	1
367	14	22.6	35.29	57.88	39.69	74.97	23.36	.53	1.64	15.31	.47	.49	8.05	1.41	1.34	2.69	2.14	1.17	November	-8.09	3	3	1	1	-.24	1	11.71	Intermediate occupations	99.2	3.83	0
368	14	22.49	36.46	58.95	39.03	75.49	23.74	.63	1.94	15.45	.57	.58	8.29	1.11	.97	2.38	1.51	.49	November	-11.09	3	1	0	1	-.39	.05	17.89	Managerial & professional occupations	36.2	3.16	0
369	14	25.22	37.09	62.3	38.62	75.71	23.85	.66	2.04	15.5	.59	.62	8.36	1.01	.95	1.85	1.24	.66	November	-1.49	1	1	0	2	1.38	.9	17.93	Managerial & professional occupations	37.8	1.72	1
370	14	23.44	36.4	59.84	39.02	75.42	23.68	.62	1.91	15.42	.56	.57	8.26	1.65	1.58	2.57	2.63	1.53	November	-3.69	1	2	1	1	.37	1	21.75	Routine & manual occupations	59.8		0
371	14	23.06	36.49	59.55	39.1	75.58	23.77	.64	1.97	15.46	.57	.59	8.31	2.22	1.52	2.47	1.24	.21	November	3.71	3	1	0	2	-.42	.05	21.75	Intermediate occupations	72.6	3.12	1
372	14	23.17	36.3	59.47	39.13	75.43	23.68	.62	1.91	15.42	.56	.58	8.27	1.36	1.3	2	1.84	1.13	November	-7.79	3	3	1	2	-.32	.3	21.75	Intermediate occupations	20.6	.94	0
373	14	23.28	36.59	59.88	39.09	75.68	23.85	.65	2.05	15.49	.58	.62	8.36	1.04	.92	1.79	1.11	.57	November	-13.99	3	3	0	1	-.21	.05	20.01	Managerial & professional occupations	18	1.94	0
374	14	24.04	36.78	60.82	39.04	75.82	23.8	.66	2.01	15.46	.59	.61	8.34	1.79	1.65	3	3.02	2.11	November	1.81	5	1	1	1	-.42	.05	22.47	Intermediate occupations	32.2		0
375	14	25.35	37.1	62.46	38.64	75.75	23.82	.65	2.02	15.48	.58	.61	8.34	2.42	2.03	3.42	2.38	1.16	November	-3.89	1	2	0	1	.15	.3	17.93	Intermediate occupations	26.2	1.36	1
376	14	26.83	37.91	64.73	37.81	75.72	23.89	.66	2.01	15.54	.59	.6	8.34	1.68	1.08	1.62	.78	.23	November	-5.89	5	1	1	1	-.39	.3	17.98	Intermediate occupations	29.6	1.1	1
377	14	23.34	36.48	59.83	39.07	75.56	23.76	.64	1.98	15.45	.57	.6	8.31	2.36	2.05	2.76	2.52	1.45	November	1.31	1	3	0	1	-.39	1.9	17.93	Managerial & professional occupations	54.4	1.82	0
378	14	23	36.4	59.39	39.1	75.5	23.73	.63	1.95	15.44	.56	.59	8.29	2.16	1.82	3.08	2.26	.88	November	.41	1	3	1	1	-.28	.2	17.93	Intermediate occupations	50.2	1.98	1
379	14	23.49	36.75	60.24	39.1	75.85	23.96	.68	2.15	15.52	.6	.65	8.43	2.73	2.12	3.45	2.5	.67	November	3.61	1	1	0	2	.12	.1	21.75	Intermediate occupations	56	2.31
380	14	23	36.45	59.45	39.09	75.54	23.76	.64	1.97	15.45	.57	.59	8.31	1.6	1.42	2.59	1.76	.83	November	-7.79	3	1	1	1	-.06	.05	17.93	Intermediate occupations	67.6	3.13	0
381	14	22.95	36.73	59.68	39.03	75.76	23.88	.65	2.06	15.5	.58	.61	8.38	1.9	1.59	2.93	1.93	.77	November	-2.89	2	1	1	3	-.64	.05	17.89	Managerial & professional occupations	30	1.56	0
382	14	14.75	30.48	45.23	43.55	74.03	22.61	.45	1.33	14.82	.4	.38	7.79	2.19	1.83	3.21	2.05	.89	November	.31	1	3	1	2	-.42	.05	8.56	Managerial & professional occupations	31.8	1.22	0
383	14	23.93	36.25	60.18	39.13	75.38	23.58	.6	1.85	15.36	.54	.56	8.22	1.98	1.73	2.61	2.17	1.06	November	3.11	3	3	1	2	-.06	.05	22.28	Managerial & professional occupations	83.2	2.37	1
384	14	12.85	28.64	41.49	44.77	73.41	22.26	.37	1.15	14.63	.33	.34	7.64	2.35	1.89	3.26	1.93	.98	November	4.91	1	3	0	3	-.39	.05	17.74	Intermediate occupations	94.8	2.69
385	14	23.17	36.3	59.47	39.13	75.43	23.68	.62	1.91	15.42	.56	.58	8.27	1.61	1.54	3.08	2.37	1.21	November	-8.19	3	3	1	2	-.35	.4	21.75	Intermediate occupations	33	1.78	0
386	14	28.93	39.15	68.08	37.72	76.87	24.39	.73	2.49	15.69	.65	.73	8.7	1.09	.94	1.45	1.25	.55	November	-10.09	4	3	0	1	-.53	.05	20.01	Routine & manual occupations	45.2	3.12	0
387	14	25.13	37.55	62.68	38.8	76.35	24.01	.71	2.18	15.55	.64	.66	8.46	1.95	1.19	1.7	.66	.08	November	-3.39	2	1	0	1	.41	.05	22.47	Intermediate occupations	19.8		0
388	14	22.92	36.56	59.48	39.06	75.62	23.81	.65	2.01	15.47	.58	.61	8.34	1.9	1.58	2.39	1.37	1.14	November	.71	3	1	1	1	-.17	.05	16.89	Managerial & professional occupations	66.2	3.48
389	14	23.49	36.64	60.12	38.92	75.55	23.76	.64	1.96	15.46	.57	.59	8.3	1.65	1.31	1.41	1.47	.82	November	.71	3	3	1	1	.01	.05	16.89	Intermediate occupations	114		0
390	14	23.87	37.23	61.1	38.62	75.85	24.03	.67	2.13	15.6	.6	.63	8.44	1.76	1.49	2.46	2.24	.78	November	-2.59	3	1	0	2	-.39	.8	17.16	Intermediate occupations	64.8	2.5	0
391	14	22.51	36.25	58.77	39.22	75.47	23.72	.63	1.93	15.43	.56	.58	8.28	1.55	1.45	3.06	2.33	1.31	November	-1.59	3	3	1	1	-.6	.05	16.89	Managerial & professional occupations	50	1.52	0
392	14	25.32	37.32	62.64	38.66	75.98	24.1	.72	2.24	15.6	.64	.69	8.5	1.42	.92	1.06	.61	.39	November	-7.79	4	3	0	2	-.39	.05	17.93	Routine & manual occupations	60.6	2.57	0
393	14	23.36	36.6	59.96	38.98	75.58	23.77	.64	1.97	15.46	.57	.59	8.31	1.78	1.51	3.28	1.66	.8	November	-5.99	4	1	1	3	-.17	.05	16.89	Inactive	42.4	1.63	0
394	14	21.95	36.23	58.17	39.24	75.46	23.72	.63	1.93	15.43	.56	.58	8.28	1.79	1.29	2.08	1	.31	November	-11.89	3	1	0	1	-.39	.05	20.01	Managerial & professional occupations	26	1.75	0
395	14	23.75	36.62	60.38	39.1	75.72	23.76	.65	1.99	15.44	.58	.6	8.32	2.25	1.87	2.36	2.11	1.23	November	6.01	5	3	1	2	-.71	.05	22.47	Managerial & professional occupations	98.2	2.41	0
396	14	30.23	41.01	71.24	36.44	77.45	25.15	.87	2.84	16.15	.78	.82	9	2.09	1.59	3.18	1.64	.43	November	-3.39	5	1	1	1	-1.04		18.95	Managerial & professional occupations	82.4	4.17	1
397	14	30.66	40.04	70.7	37.21	77.24	25.31	.95	3.17	16.18	.84	1.01	9.13	2.04	1.73	2.86	2	.84	November	-4.09	5	3	0	1	-.39	.1	13.25	Routine & manual occupations	40.6	1.76	0
398	14	22.73	36.45	59.18	39.11	75.56	23.77	.64	1.97	15.45	.57	.59	8.31	1.55	1.32	2.33	1.6	.71	November	-3.19	1	3	0	1	-.32	.05	16.89	Routine & manual occupations	20.4	.87	0
399	15	50.27	49.55	99.81	32.25	81.8	28.19	1.63	5.19	17.49	1.45	1.55	10.7	1.95	1.81	3.19	2	1.04	January	-1.89	2	3	0	1	-.57	.05	41.23	Routine & manual occupations	24.4	1.27	0
400	15	32.03	41.79	73.82	35.71	77.51	24.94	.85	2.61	16.11	.76	.78	8.83	1.8	1.59	3	2.36	.89	January	-.59	5	3	1	1	-.06	1.7	41.5	Routine & manual occupations	50.6	2.2	1
401	15	29.69	40.79	70.49	36.44	77.23	25.22	.9	2.8	16.27	.8	.83	8.96	2.34	2	3.71	2.46	1.06	January	4.41	1	3	1	3	-.64	.05	30.22	Managerial & professional occupations	33.8	1.49	1
402	15	28.06	40.23	68.29	36.75	76.97	24.78	.83	2.53	16.02	.74	.75	8.76	1.91	1.67	2.95	2.38	1.2	January	-2.49	3	3	0	1	-.03	.9	54.56	Unclassified [in work,occ unknown]	37.6	1.41	1
403	15	28.92	40.46	69.38	36.51	76.96	24.76	.82	2.48	16.02	.73	.74	8.73	2.28	1.89	2.45	1.79	1.18	January	4.41	2	3	1	2	-.06	.1	47.92	Unclassified [in work,occ unknown]	57.2	1.65	0
404	15	34.52	42.66	77.18	35.3	77.96	25.86	1	3.21	16.61	.9	.96	9.25	2.09	1.77	3.1	2.12	.94	January	1.31	1	3	1	4	-.42	.05	30.22	Intermediate occupations	39	1.6	0
405	15	26.67	38.98	65.65	37.36	76.34	24.58	.74	2.26	16.03	.66	.68	8.55	1.88	1.67	3.79	2.28	1.06	January	-1.49	2	3	0	1	.01	.1	42.28	Inactive	25	1.38	0
406	15	31.18	41.4	72.58	36.09	77.49	25.42	.94	2.95	16.35	.84	.88	9.07	1.61	1.37	2.57	1.77	.92	January	-3.49	2	3	1	3	-.6	.4	30.22	Unclassified [in work,occ unknown]	22	1.08	0
407	15	30.9	40.85	71.75	36	76.84	24.69	.78	2.37	16.02	.7	.71	8.67	1.77	1.77	3.87	3.61	1.97	January	-.69	3	3	1	2	-.28	.1	41.5	Routine & manual occupations	71.8	2.41	0
408	15	29.87	40.69	70.56	36.29	76.97	25.2	.83	2.58	16.24	.74	.77	8.96	2.7	2.37	4.7	3.45	1.27	January	7.51	1	3	1	3	-.13	2.1	47.4	Managerial & professional occupations	68.6	2.13	1
409	15	30.87	41.13	72	36.01	77.14	24.79	.81	2.46	16.06	.72	.73	8.72	1.69	1.62	3.74	2.49	1.19	January	12.51	3	3	1	2	-.24	.05	50.07	Intermediate occupations		2.12	0
410	15	32.72	42.12	74.84	35.75	77.87	25.76	1.01	3.2	16.51	.9	.95	9.25	1.4	1.31	2.85	1.91	.98	January	-6.89	2	3	1	2	-.17	.05	30.22	Routine & manual occupations	19.2	1.13
411	15	30.87	41.26	72.12	35.99	77.25	24.91	.83	2.54	16.11	.74	.76	8.8	2.08	1.65	2.73	1.47	.76	January	-.19	2	3	0	2	-.03	.7	41.5	Routine & manual occupations	15.4	.81	0
412	15	29.33	40.44	69.77	36.43	76.87	25.07	.82	2.53	16.19	.73	.76	8.87	1.34	1.13	2.31	1.3	.54	January	-3.49	2	3	1	2	-.1	2.3	47.4	Routine & manual occupations	55.4	2.3	0
413	16	22.42	36.3	58.73	39.26	75.56	23.81	.65	2.01	15.47	.58	.61	8.34	1.87	1.16	1.31	.99	.64	January	-1.29	3	2	0	4	.37	4.3	20.01	Inactive	38.6	2.07	0
414	16	24.49	38	62.49	38.26	76.26	24.24	.71	2.22	15.73	.64	.67	8.5	1.8	1.78	4.57	3.23	1.71	January	1.91	3	2	1	4	.84	.05	18.48	Managerial & professional occupations	68.2	2.45	0
415	16	26.13	38.49	64.61	38.2	76.68	24.42	.76	2.47	15.72	.68	.73	8.69	1.86	1.26	1.93	1.12	.39	January	-1.79	5	1	1	1	.15	.5	17.16	Managerial & professional occupations		2.08	1
416	16	21.09	34.94	56.02	40.02	74.96	23.37	.57	1.74	15.23	.5	.53	8.14	2.34	1.89	2.46	1.82	1.27	January	2.71	2	2	1	3	.66	.05	20.75	Intermediate occupations	105.2	4.62	0
417	16	29.1	39.29	68.39	38.07	77.36	24.84	.87	2.88	15.89	.77	.89	8.95	2.2	1.57	2.26	1.27	.68	January	-6.09	5	1	0	1	-.1	.05	20.27	Managerial & professional occupations	21.4	2.16	0
418	16	21.95	35.65	57.6	39.68	75.32	23.58	.6	1.88	15.34	.54	.57	8.23	2	1.73	2.13	1.97	1.28	January	3.01	2	2	1	3	.52	.05	22.28	Routine & manual occupations	102.4		1
419	16	18.72	34.29	53.01	40.77	75.06	23.36	.57	1.75	15.22	.51	.52	8.15	2.07	1.42	2.45	1.31	2.13	January	-10.89	1	1	1	2	.26	.3	16.67	Intermediate occupations	26.4	2.54	1
420	16	23.37	37.12	60.48	38.98	76.1	24.01	.67	2.13	15.59	.6	.64	8.43	2.26	1.75	3.1	1.76	.69	January	5.81	5	1	1	1	-.28	.05	34.5	Intermediate occupations	92.7	5.06	0
421	16	23.13	35.93	59.07	39.27	75.2	23.56	.59	1.85	15.35	.53	.56	8.21	2.4	2.13	4.15	2.59	1.22	January	.91	3	2	0	4	.73	.05	31.94	Intermediate occupations	124	3.99	0
422	16	23.55	37.03	60.58	38.71	75.74	23.95	.67	2.09	15.54	.6	.62	8.4	2.03	1.2	1.33	.97	.92	January	-2.59	3	2	0	2	.55	.05	17.89	Inactive	28.6	1.44	0
423	16	31.91	41.71	73.61	35.67	77.38	24.69	.76	2.27	16.09	.68	.68	8.6	1.94	1.08	1.08	.99	.75	January	6.11	3	2	1	2	.73	.05	19.79	Routine & manual occupations	42.6	1.27	0
424	16	23.35	36.35	59.69	39.22	75.57	23.68	.62	1.92	15.4	.56	.58	8.27	1.93	1.64	3.3	1.89	.81	January	-7.79	3	2	0	1	.84	.05	22.28	Intermediate occupations	32.4	2.16	0
425	16	21.23	35.56	56.79	39.79	75.35	23.62	.61	1.9	15.37	.54	.58	8.25	2.38	2.04	4.09	2.42	1.22	January	1.41	1	2	0	1	.59	.1	26.04	Unclassified [in work,occ unknown]	41	1.78	1
426	16	22.7	35.89	58.58	39.47	75.36	23.59	.6	1.89	15.35	.54	.57	8.24	2.09	1.74	3.46	2	.9	January	2.11	3	1	0	2	-.13	.05	22.28	Routine & manual occupations	41.8	1.81	0
427	16	21.51	35.51	57.02	39.65	75.16	23.54	.59	1.82	15.35	.53	.55	8.19	2.19	1.83	3.44	2.01	.89	January	4.21	5	2	1	2	.84	.05	14.49	Inactive		2.42	1
428	16	40.44	44.72	85.16	35.74	80.46	25.69	1.15	3.42	16.36	1.03	1.08	9.32	2.13	1.74	3.91	1.99	.6	January	2.41	2	1	1	3	-.1	.05	20.27	Inactive	28.8	1.19	0
429	16	23.73	36.17	59.9	39.15	75.32	23.61	.6	1.86	15.38	.54	.57	8.22	1.74	1.73	2.75	2.81	1.53	January	.01	3	2	1	3	.62	.05	14.49	Intermediate occupations	50	1.69	0
430	16	24.79	37.58	62.38	38.41	75.99	24.14	.66	2.12	15.72	.59	.64	8.42	2.41	2.01	3.51	2.37	1.01	January	2.01	2	2	0	3	.62	.05	20.35	Inactive	29	1.83	0
431	16	24.27	36.81	61.08	38.93	75.74	23.85	.66	2.06	15.48	.58	.62	8.37	1.92	1.81	3.78	2.32	1.42	January	1.51	3	2	1	1	.62	.2	22.28	Intermediate occupations	90	3.35	0
432	16	21.08	35.82	56.9	39.69	75.51	23.72	.63	1.95	15.43	.56	.59	8.29	2.03	1.81	3.88	2.8	1.09	January	-2.49	4	2	1	1	.77	.2	28.92	Routine & manual occupations	45.8	2.7	0
433	16	19.69	34.97	54.66	40.13	75.09	23.49	.58	1.81	15.3	.52	.55	8.19	2.5	1.54	3.55	1.01	.3	January	1.21	2	1	1	3	-.13	.05	31.94	Managerial & professional occupations	37.2	1.48	1
434	16	22.82	36.47	59.29	39.14	75.61	23.79	.64	2	15.46	.57	.6	8.33	2.13	1.28	2.99	1.99	1.01	January	2.61	2	1	0	3	.52	.4	20.01	Unclassified [in work,occ unknown]	32.8	1.33	0
435	16	29.91	39.72	69.63	37.82	77.54	24.7	.87	2.73	15.87	.77	.86	8.83	2.7	2.23	3.62	2.59	1.12	January	3.71	1	1	0	2	-.28	.05	20.27	Managerial & professional occupations	52.8	2.49	0
436	16	22.17	35.96	58.13	39.63	75.59	23.74	.63	2.02	15.41	.56	.62	8.33	2.23	1.8	2.34	1.88	.7	January	-1.79	1	1	1	3	-.13	.3	22.28	Intermediate occupations	44.2	2.47	0
437	16	21.65	35.3	56.95	40.03	75.33	23.48	.6	1.84	15.28	.53	.55	8.21	2.16	1.88	4.02	2.26	1	January	-1.19	5	1	1	2	-.13	.2	29.35	Managerial & professional occupations	27	1.35	1
438	16	26.75	39.43	66.18	37.07	76.5	24.52	.77	2.37	15.88	.69	.71	8.64	2.56	2.25	3.55	2.86	1.37	January	1.51	1	2	0	1	.84	.05	30.55	Routine & manual occupations	78.2	2.74	1
439	16	20.91	35.4	56.31	39.82	75.21	23.5	.6	1.8	15.31	.54	.54	8.19	2.59	2.19	3.82	2.66	1.19	January	3.51	3	1	1	3	.05	.2	23.36	Managerial & professional occupations	72.8	2.57	0
440	16	23.45	36.43	59.89	39.11	75.55	23.73	.64	1.96	15.43	.57	.59	8.3	2.04	1.83	4.23	2.56	1.07	January	-3.29	3	1	0	2	-.24	.05	22.47	Routine & manual occupations	47.8	3.36	0
441	16	25.12	37.98	63.09	38.28	76.25	24.27	.7	2.26	15.74	.63	.68	8.53	2.21	1.98	3.98	2.88	1.25	January	-1.19	3	2	0	4	.55	.05	13.25	Managerial & professional occupations	55.2	1.71	0
442	16	25.78	38.02	63.8	38.21	76.23	24.36	.75	2.42	15.71	.67	.72	8.65	2.42	1.92	3.37	2.01	.73	January	5.71	3	1	1	3	-.13	.05	17.89	Intermediate occupations	32.6	.79	0
443	16	28.64	40.31	68.95	37.43	77.74	24.4	.73	2.31	15.82	.65	.68	8.59	1.86	1.59	3.94	1.99	.93	January	-4.19	2	1	0	2	.41	1.3	38.93	Managerial & professional occupations	17.8	1.69	0
444	17	39.89	45.87	85.76	33.21	79.08	25.76	1.01	3.01	16.6	.9	.91	9.16	2.13	1.52	1.8	1.12	.6	January	3.41	1	3	0	2	.01	.05	22.08	Inactive	30.2		0
445	17	26.85	38.24	65.08	37.82	76.06	24.09	.71	2.21	15.6	.63	.65	8.49	1.94	1.68	2.96	1.89	.7	January	-4.19	3	3	0	1	-.1	.05	20.67	Inactive	33.4		0
446	17	25.68	38.83	64.5	38.04	76.86	24.7	.79	2.73	15.86	.71	.85	8.84	2.2	1.9	2.63	2.54	1.21	January	.21	5	3	1	1	-.35	.1	18.74	Managerial & professional occupations	69		1
447	17	36.81	43.71	80.52	34.6	78.31	25.75	1.08	3.18	16.49	.96	.94	9.26	1.57	1.47	2.93	2.32	1.18	January	-2.89	5	3	1	1	-.13	.3	31.8	Routine & manual occupations	81.1		0
448	17	22.25	35.81	58.06	39.51	75.33	23.61	.6	1.9	15.36	.53	.58	8.24	2.06	1.68	3.23	1.78	.77	January	1.01	1	3	1	4	-.17	3.2	26.76	Managerial & professional occupations	66		0
449	17	22.24	35.63	57.87	39.46	75.09	23.42	.56	1.71	15.3	.5	.52	8.12	2.34	2	3.93	2.19	.9	January	3.11	1	3	1	2	-.06	4.3	15.76	Intermediate occupations	33.8		1
450	17	24.02	36.89	60.92	38.77	75.67	23.73	.59	1.83	15.51	.53	.55	8.22	1.92	1.78	4.51	3.01	1.43	January	-3.39	2	3	0	3	.12	.05	27.16	Managerial & professional occupations	22		0
451	17	21.94	35.65	57.59	39.67	75.32	23.57	.6	1.87	15.34	.54	.57	8.23	2.89	2.63	4.48	3.68	1.7	January	4.01	1	3	0	3	-.24	.9	22.28	Intermediate occupations	28.6		1
452	17	29.65	39.83	69.48	37.26	77.09	24.33	.65	2.04	15.93	.58	.61	8.4	1.88	1.66	2.97	2.21	1.05	January	-2.19	1	3	0	1	.05	.1	28.81	Managerial & professional occupations	44.6		1
453	17	20.28	35.45	55.73	39.85	75.3	23.57	.59	1.83	15.36	.53	.55	8.21	2.56	2.23	3.48	2.91	1.34	January	-.69	1	3	0	4	.05	1	26.43	Managerial & professional occupations	27		1
454	17	27.44	39.11	66.55	37.46	76.57	24.39	.68	2.11	15.95	.61	.63	8.44	1.8	1.63	3.96	2.25	1.04	January	-5.19	1	3	1	1	.08	.05	26.29	Managerial & professional occupations	28		1
455	17	27.3	39.09	66.4	37.54	76.63	24.43	.72	2.26	15.89	.65	.68	8.54	1.7	1.65	3.79	2.97	1.4	January	-1.69	1	3	1	1	-.46	1.3	25.8	Intermediate occupations	59.4
456	17	19.45	34.76	54.21	40.2	74.96	23.37	.55	1.71	15.26	.49	.51	8.11	1.98	1.7	4.13	2.37	1.2	January	3.01	1	3	0	1	-.06	.1	12.37	Intermediate occupations	32.7		0
457	17	25.96	38.02	63.98	38.27	76.28	24.22	.69	2.28	15.69	.62	.69	8.53	2.13	1.86	3.75	2.27	1.05	January	1.21	1	3	1	2	.15	.05	21.85	Intermediate occupations	65.6		0
458	17	24.11	37.26	61.37	38.63	75.9	24.09	.65	2.07	15.71	.58	.62	8.39	1.77	1.64	3.97	2.34	1	January	-5.39	2	3	0	1	.12	.05	19.18	Inactive	18.8		0
459	17	24.13	36.82	60.96	38.7	75.53	23.7	.59	1.81	15.5	.52	.54	8.2	2.06	1.37	1.61	1.16	.72	January	2.61	2	3	1	3	.12	.05	27.16	Managerial & professional occupations	64.2		0
460	17	20.99	35.11	56.1	39.92	75.03	23.41	.57	1.76	15.26	.51	.53	8.15	2.5	2.14	3.29	2.55	1.22	January	-1.09	1	3	0	4	.01		12.83	Routine & manual occupations	23.6		0
461	17	24.39	37.44	61.83	38.53	75.96	24.16	.67	2.13	15.72	.6	.64	8.43	2.29	2.09	4.63	3.36	1.53	January	-.29	1	3	1	2	-.17	.5	20.35	Intermediate occupations	29.4		0
462	17	33.96	42.79	76.75	35.51	78.29	25.66	1.04	3.24	16.38	.93	.97	9.28	1.57	1.48	3.03	1.74	.96	January	.61	1	3	0	2	.05	1.1	41.23	Inactive	24		0
463	18	31.61	41.76	73.37	36.04	77.79	25.3	.96	2.97	16.22	.86	.89	9.07	1.87	1.66	2.58	1.93	1.06	September	-3.59	3	2	1	2	1.53	.6	41.23	Routine & manual occupations	44.2	1.83	0
464	18	41.2	46.96	88.16	33.68	80.64	26.44	1.18	3.78	16.77	1.06	1.14	9.68	2.35	2.05	2.79	2.47	1.44	September	.11	5	2	0	1	.34	.2	41.5	Inactive	46.2	1.4	1
465	18	30.11	40.96	71.07	36.37	77.33	25.18	.92	2.87	16.17	.82	.85	9.01	2.6	2.28	2.51	2.77	1.95	September	5.71	1	2	1	1	1.49	.8	40.54	Routine & manual occupations	102.8	5.24	0
466	18	31.78	42.78	74.56	35.05	77.83	25.24	.92	2.63	16.33	.82	.79	8.91	3	2.64	3.61	2.87	1.61	September	-2.09	2	2	0	1	.88	.05	20.95	Routine & manual occupations	47.2	1.46	0
467	18	46.83	48.2	95.03	32.86	81.06	28.14	1.58	5.05	17.48	1.41	1.46	10.65	2.39	1.96	3.49	2.91	.7	September	-2.69	5	2	1	1	.84	3.3	40.54	Intermediate occupations	37	1.1	1
468	18	54.58	51.25	105.83	31.43	82.68	29.53	1.85	6.1	18.12	1.66	1.78	11.41	3.21	2.92	4.69	2	2.36	September	5.21	3	2	0	3	1.02	.05	40.54	Managerial & professional occupations	98	2.74	0
469	18	39.15	44.93	84.08	34.37	79.3	26.87	1.26	4.11	16.97	1.12	1.23	9.91	1.88	1.66	2.65	2.08	1.13	September	-2.99	2	2	1	1	.99	.05	40.54	Inactive	62	3.06
470	18	38.31	45.06	83.38	34.27	79.33	26.29	1.18	3.6	16.72	1.05	1.06	9.57	1.67	1.57	2.71	1.8	1.32	September	-.19	1	2	0	1	.44	4	57.59	Intermediate occupations	53	2.47
471	18	37.89	45.14	83.04	34.71	79.85	26.56	1.16	4.01	16.75	1.03	1.21	9.82	1.82	1.69	2.69	1.94	1.21	September	-2.59	5	2	0	1	.59	.05	44.95	Inactive	38.6	1.66
472	18	33.63	42.66	76.29	35.58	78.24	25.64	1.04	3.23	16.37	.93	.96	9.27	2.08	1.95	3.1	2.46	1.42	September	-3.49	3	2	1	3	.81	.05	41.23	Intermediate occupations	43.4	1.08	0
473	18	29.75	39.92	69.67	36.6	76.52	24.73	.75	2.31	16.15	.67	.69	8.58	2.27	1.89	2.91	1.87	1.07	September	-1.29	2	2	0	2	1.46	.1	42.28	Routine & manual occupations	23.8	1.02	0
474	18	30.02	40.89	70.91	36.36	77.24	25.26	.9	2.81	16.3	.8	.84	8.96	2	1.71	2.59	2.19	.92	September	-4.19	3	2	0	2	1.31	.05	30.22	Routine & manual occupations	21.8	1.45	0
475	18	29.36	40.83	70.19	36.34	77.16	24.74	.79	2.4	16.07	.71	.71	8.67	1.8	1.2	1.56	1.08	.55	September	-1.79	2	2	0	2	.26	.05	44.03	Routine & manual occupations	15.8	1.35	0
476	18	27.46	39.79	67.25	36.97	76.76	24.68	.81	2.48	15.96	.72	.74	8.73	2.44	2.24	4.36	3.42	1.44	September	2.51	2	2	0	3	1.02	.1	40.54	Intermediate occupations	23.8	1.23	0
477	18	29.3	40.49	69.79	36.55	77.04	24.89	.86	2.65	16.05	.76	.79	8.84	2.27	1.59	1.5	1.1	.64	September	1.61	2	2	0	2	.62	.05	41.23	Unclassified [in work,occ unknown]	27.8	1.28	0
478	18	29.46	40.53	69.99	36.62	77.15	25.02	.88	2.73	16.12	.78	.82	8.9	2.22	1.79	2.45	1.21	1.12	September	3.01	2	2	0	2	.3	.1	46.39	Routine & manual occupations	56.6	1.46	0
479	18	28.26	39.62	67.88	36.94	76.56	24.76	.77	2.38	16.12	.69	.71	8.64	1.56	1.37	2.23	1.35	.89	September	-5.49	4	2	1	1	.73	.05	42.28	Routine & manual occupations	23	.01	0
480	18	27.91	39.91	67.83	36.83	76.75	24.65	.8	2.45	15.95	.71	.73	8.7	2.28	1.88	2.88	2.15	1.01	September	5.31	2	2	1	2	1.35	.05	44.95	Routine & manual occupations	101.4	3.1	0
481	18	27.97	40.04	68.01	36.87	76.9	24.79	.83	2.57	16	.74	.77	8.79	2.44	2.23	4.73	3.24	1.46	September	2.71	5	2	0	2	.88	.05	41.23	Routine & manual occupations	28	.75	0
482	18	29.35	40.63	69.98	36.55	77.17	25.04	.89	2.77	16.11	.79	.82	8.93	2.19	2.11	3.46	2.94	2.06	September	3.11	2	2	1	1	.73	.3	40.54	Routine & manual occupations	115.8	3.4	0
483	19	32.01	41.74	73.75	35.69	77.43	25.03	.83	2.53	16.24	.74	.76	8.8	1.94	1.68	2.81	1.75	1.04	September	-.29	1	2	0	1	-.28	.1	21.62	Intermediate occupations	76.4	2.54	0
484	19	22.96	37.14	60.11	38.7	75.85	24.11	.66	2.04	15.74	.59	.61	8.38	1.87	1.64	2.93	2.26	.94	September	-7.29	2	2	1	1	-.46	.4	58	Managerial & professional occupations	25.6	.47	1
485	19	35.95	45.07	81.02	34.74	79.81	25.73	1.09	3.12	16.52	.98	.94	9.21	2.02	1.81	2.67	2.28	1.31	September	-1.79	3	2	0	1	-.57	.05	31.3	Inactive	25.4	.17	1
486	19	24.47	38.21	62.68	38.11	76.32	24.38	.77	2.4	15.75	.68	.72	8.64	1.95	1.9	3.56	2.81	1.65	September	-1.29	2	2	0	1	-.35		18.47	Inactive	75.6	3.04	0
487	19	26.84	39.01	65.84	37.34	76.34	24.41	.74	2.25	15.87	.66	.67	8.54	2.27	2.03	4.22	2.3	1	September	3.71	2	2	0	4	-.53	.2	16.96	Intermediate occupations	39.4	1.84	1
488	19	36.81	44.21	81.03	34.57	78.78	25.51	.98	2.97	16.42	.88	.89	9.1	2.24	2.03	4.68	3.24	1.82	September	-1.29	2	2	0	1	-.24	.1	49.84	Inactive	55.4	1.59	0
489	19	34.76	44.79	79.55	33.98	78.78	25.59	.97	2.79	16.52	.87	.81	9.07	2.17	1.9	4.14	3.04	1.07	September	1.31	2	2	0	2	-.5	.05	39.23	Managerial & professional occupations	33.2	.8	0
490	19	27.63	39.83	67.46	36.79	76.61	24.44	.76	2.25	15.87	.68	.67	8.57	1.51	1.4	3.13	2.04	.95	September	-2.19	3	2	1	1	-.5	.05	26.45	Routine & manual occupations	26.2	.96	0
491	19	31.84	41.68	73.52	35.69	77.37	24.69	.82	2.39	16.01	.73	.72	8.69	2.11	1.83	2.88	1.99	1.24	September	1.21	1	2	1	1	-.89	1.4	18.86	Inactive	63.6	2.47	0
492	19	31.19	41.29	72.48	35.85	77.14	24.84	.83	2.5	16.08	.74	.75	8.76	1.74	1.2	1.27	.93	.59	September	-2.99	3	2	0	2	-.86	.05	39.08	Routine & manual occupations	30.4	.61	0
493	19	31.62	41.5	73.12	35.63	77.13	24.77	.81	2.38	16.1	.72	.71	8.67	2.26	2.01	4.05	2.81	1.24	September	-1.59	5	2	0	2	-.42	1.7	39.95	Routine & manual occupations	34.6	.57	0
494	19	32.2	41.95	74.15	35.54	77.49	24.95	.84	2.49	16.19	.75	.74	8.75	2.29	2.07	4.73	3.33	1.24	September	.51	3	2	0	2	-.5	.3	33.12	Intermediate occupations	33.2	.81	0
495	19	30.21	42.02	72.23	35.99	78.01	24.96	.88	2.59	16.12	.79	.77	8.84	2.31	1.84	3.07	2.11	.87	September	1.91	2	2	0	2	-.32	1.5	26.54	Intermediate occupations	23	.91	0
496	19	30.62	42.11	72.73	35.48	77.59	24.94	.85	2.44	16.19	.76	.73	8.75	1.8	1.42	2.99	1.45	.52	September	-3.39	2	2	0	2	-.64	.1	21.64	Routine & manual occupations	46.6	1.32	0
497	19	30.67	39.57	70.24	37.74	77.3	24.87	.84	2.93	15.91	.75	.92	8.96	1.76	1.58	2.81	1.81	.84	September	-.49	3	2	0	1	-.32	.1	17.38	Intermediate occupations	47	.76	0
498	19	32.26	42.5	74.76	35.6	78.09	25.25	.91	2.78	16.26	.81	.83	8.99	1.7	1.63	3.43	3.03	1.3	September	-5.09	5	2	1	1	-.24	.05	31.3	Intermediate occupations	55.8	2.43	1
499	19	24.49	37.72	62.21	38.42	76.13	24.15	.65	2.02	15.79	.58	.61	8.36	2.12	1.89	4.07	3.78	1.32	September	.41	2	2	0	2	-.39	.05	20.19	Managerial & professional occupations	86.4	3.75	1
500	19	37.77	44.07	81.84	34.87	78.93	26.48	1.2	3.97	16.68	1.07	1.17	9.8	2.08	1.82	3.51	1.71	1.02	September	1.71	3	2	0	1	-.53	.05	22.51	Inactive	20.4		0
501	19	28.55	40.83	69.38	36.46	77.29	24.71	.81	2.41	16.01	.72	.72	8.7	2.06	1.69	3.12	1.84	.84	September	-1.29	5	2	0	2	-.42	2.4	38.27	Intermediate occupations	38.6	1.67	1
502	19	29.32	41.04	70.36	36.3	77.33	24.75	.82	2.41	16.05	.73	.72	8.69	2.06	1.72	1.83	1.97	1.43	September	-1.49	3	2	0	1	-.71	.05	31.3	Managerial & professional occupations	41.4	2.06	0
503	19	33.45	43.4	76.85	35.33	78.73	25.71	1.04	3.2	16.43	.93	.96	9.27	2.98	2.69	5.14	3.89	1.5	September	1.61	2	2	0	2	-.79	.05	53.16	Routine & manual occupations	42.6	2.67	1
504	19	29.47	41.55	71.02	36.24	77.79	24.92	.87	2.57	16.11	.78	.77	8.82	2.13	1.97	4.42	2.63	1.26	September	-4.49	3	2	0	1	-.46	.05	38.27	Managerial & professional occupations	22.8	.24	0
505	19	36.76	45.54	82.3	34.58	80.13	25.83	1.12	3.2	16.56	1	.96	9.27	1.98	1.73	2.74	2.25	.93	September	-2.59	5	2	0	1	-.6	.05	31.3	Managerial & professional occupations	23	.08	0
506	19	30.16	41.25	71.41	35.89	77.15	24.73	.81	2.4	16.04	.72	.71	8.69	1.92	1.75	3.69	2.25	1.17	September	-4.49	1	2	0	1	-.68	7.4	39.95	Inactive	36.6	2.08	1
507	20	22.83	37.27	60.1	38.67	75.95	24.12	.71	2.14	15.64	.64	.64	8.48	2.02	1.65	3.5	1.76	.73	September	.21	1	1	0	1	1.06	11.3	29.72	Routine & manual occupations	51	2.07	1
508	20	32.08	41.62	73.7	35.61	77.23	24.85	.81	2.43	16.15	.73	.72	8.7	1.24	1.21	2.48	1.48	.96	September	-7.59	1	1	0	2	.95	2.2	33.12	Managerial & professional occupations	34.8	1.44	1
509	20	31.34	41.25	72.59	35.78	77.03	24.77	.8	2.37	16.1	.71	.71	8.66	1.53	1.31	2.26	1.75	.72	September	-3.79	2	4	1	1	.81	.1	33.12	Routine & manual occupations	20.2	1.13	0
510	20	20.32	35.56	55.88	39.81	75.37	23.64	.6	1.88	15.4	.54	.57	8.25	1.35	1.34	4.03	2.63	1.22	September	-3.49	2	4	1	1	.88	.7	34.5	Routine & manual occupations	25.8	.82	0
511	20	33.22	43.64	76.86	34.51	78.16	25.28	.92	2.59	16.39	.82	.77	8.89	2.37	2.13	4.81	3.03	1.24	September	1.31	2	4	0	1	.23	.05	52.52	Unclassified [in work,occ unknown]	68.8	2.79	0
512	20	34.44	42.94	77.38	35.15	78.09	25.26	.91	2.84	16.26	.81	.85	9	1.87	1.46	2.13	1.42	.58	September	.21	1	1	1	1	.99	.05	41.5	Routine & manual occupations	110.6	4.19	1
513	20	28.87	40.39	69.26	36.4	76.79	24.66	.78	2.34	16.03	.7	.7	8.64	2.29	2.14	3.83	3.81	1.81	September	.91	2	4	1	3	.59	.05	29.38	Routine & manual occupations	28.8	1.4	0
514	20	38.66	45.68	84.34	34.22	79.89	26.08	1.1	3.51	16.6	.98	1.05	9.48	2.23	1.87	2.78	2	1.02	September	-.79	1	1	0	1	2.32	6.4	41.5	Routine & manual occupations	18.4	1.27	0
515	20	41.62	47.2	88.83	33.58	80.79	26.66	1.21	3.94	16.87	1.08	1.18	9.79	1.81	1.6	3.27	1.93	.86	September	-2.79	5	4	0	1	.84	.7	49.84	Inactive	20	.95	0
516	20	27.42	38.63	66.05	37.73	76.36	24.29	.75	2.38	15.67	.67	.7	8.63	1.85	1.78	3.38	2.8	1.46	September	-2.99	2	1	0	1	.95	.7	17.09	Intermediate occupations	34	1.67	1
517	20	25.97	38.53	64.49	37.6	76.12	24.43	.69	2.12	15.99	.62	.63	8.44	2.29	2	2.52	2.44	1.81	September	.71	2	4	0	1	.88	.05	19.07	Routine & manual occupations	17.4	.99	1
518	20	39.47	44.83	84.3	34.07	78.9	26.28	1.22	3.56	16.74	1.09	1.05	9.54	2.61	2.37	3.84	3.37	1.83	September	6.21	2	1	0	2	1.02	.05	31.8	Routine & manual occupations	59.4	1.8	0
519	20	32.97	41.9	74.86	35.44	77.34	24.96	.86	2.59	16.14	.77	.77	8.82	1.85	1.57	3.71	2.09	.69	September	-6.79	2	1	1	2	1.96	.05	31.8	Managerial & professional occupations	18.6	1.31	0
520	20	30.5	40.11	70.61	37.32	77.43	24.41	.72	2.37	15.8	.64	.71	8.62	1.39	1.37	4.36	3.29	1.53	September	-1.79	2	1	1	3	.99	.1	30.56	Routine & manual occupations	30.6	.9	1
521	20	26.28	37.79	64.06	38.3	76.09	23.87	.62	1.96	15.56	.56	.59	8.32	1.84	1.82	3.88	3.26	1.75	September	-1.69	2	1	0	2	.95	.05	30.56	Managerial & professional occupations	27	1.25	0
522	20	35.08	43.14	78.22	34.8	77.94	25.07	.82	2.42	16.36	.73	.72	8.71	2.24	2.02	3.44	3.39	1.4	September	.91	2	1	0	3	.95	.05	32.49	Unclassified [in work,occ unknown]	30.2	.99	0
523	20	41.11	47.76	88.86	33.54	81.3	26.18	1.11	3.35	16.77	1	.97	9.41	1.5	1.44	2.93	2.18	1.04	September	-4.79	1	1	0	1	1.42	3.5	32.49	Intermediate occupations	24.2	1.67	0
524	20	30.03	41.3	71.33	36.36	77.66	25.08	.88	2.76	16.15	.79	.83	8.93	1.87	1.53	2.4	1.63	1.05	September	-1.29	1	4	0	2	.52	.5	44.95	Inactive	28.6	1.45	1
525	20	33.62	42.7	76.32	35.26	77.96	25.16	.89	2.66	16.28	.79	.79	8.88	1.61	1.49	3.14	2.31	1.07	September	.11	2	1	1	1	1.06	.5	33.12	Intermediate occupations	85.8	3.2	0
526	20	30.06	40.85	70.91	36.34	77.19	25.21	.89	2.77	16.28	.79	.83	8.94	2.63	2.21	4.85	2.79	1.04	September	1.01	1	4	0	1	.01	3.2	30.22	Managerial & professional occupations	26	.79	1
527	20	56.36	51.6	107.96	30.38	81.98	26.44	.95	2.86	17.31	.85	.86	9.13	2.27	1.88	4.25	2.15	.86	September	1.91	2	1	1	1	1.6	.05	34.97	Intermediate occupations	67.4	2.65	1
528	20	38.66	45.68	84.34	34.22	79.89	26.08	1.1	3.51	16.6	.98	1.05	9.48	1.8	1.78	3.94	3.74	2.27	September	-3.59	1	4	1	1	.77	4.4	41.5	Inactive	37.8	2.11	1
529	20	31.85	41.57	73.42	35.69	77.26	24.94	.86	2.58	16.12	.77	.77	8.82	2.04	1.89	4.42	2.38	1.18	September	4.71	1	1	1	3	1.13	2.1	39.08	Intermediate occupations	64.4	1.93	0
530	20	58.74	55.68	114.42	30.29	85.97	28.01	1.7	4.58	17.71	1.51	1.39	10.3	2.46	2.23	4.63	3.53	1.75	September	-.29	4	4	0	3	.08	.05	48.27	Intermediate occupations	25.4	.62	0
531	20	29.51	40.63	70.14	36.33	76.97	24.72	.8	2.43	16.02	.71	.73	8.7	1.62	1.46	4.23	2.13	.89	September	-6.09	2	4	1	3	.44	.05	41.5	Routine & manual occupations	75.6	3.32	1
532	20	43.5	48.08	91.58	33.15	81.23	26.93	1.29	4.01	17.04	1.15	1.18	9.88	1.4	1.33	1.88	1.75	.96	September	-5.69	1	4	1	1	.62	.05	41.11	Intermediate occupations	17.8	1.12	1
533	20	35.09	43.14	78.24	34.92	78.06	25.63	1.05	3.08	16.44	.94	.91	9.19	2.12	1.95	3.54	2.67	1.25	September	-1.99	1	1	1	2	1.09	.2	31.8	Managerial & professional occupations	50.4	2.43	1
534	20	26.36	37.59	63.95	38.69	76.28	24.23	.72	2.42	15.62	.64	.75	8.6	1.64	1.5	3.53	1.93	.93	September	-.49	1	4	1	1	.95	1.7	16.59	Routine & manual occupations	23.6	.95	1
535	20	33.49	42.83	76.32	35.36	78.19	25.46	.98	2.99	16.36	.88	.88	9.1	1.65	1.4	2.33	1.4	.78	September	-3.79	2	1	1	1	1.38	.05	44.03	Routine & manual occupations	29.6	1.48	0
536	20	32.29	41.42	73.72	35.54	76.96	24.72	.79	2.34	16.09	.7	.7	8.64	2.86	2.51	4.86	3.36	1.1	September	7.91	5	1	1	2	.95	.5	29.38	Managerial & professional occupations	64	2.27	1
537	20	29.78	41.03	70.8	36.23	77.26	26.05	.85	2.67	16.29	.76	.8	9.76	1.83	1.81	3.65	2.86	1.6	September	-3.49	2	4	0	2	.37	.05	39.08	Intermediate occupations	23	1	0
538	20	39.88	45.01	84.89	34.26	79.27	26.85	1.21	3.97	17.05	1.08	1.18	9.81	2.03	1.95	3.66	2.97	1.76	September	4.21	2	4	1	1	.91	.05	42.28	Managerial & professional occupations	79.2	3.19	0
539	20	36.95	44.53	81.48	34.53	79.06	25.57	1.01	3	16.45	.9	.89	9.12	2.13	1.78	2.48	1.81	1.37	September	-1.89	1	4	0	1	.55	.8	49.84	Intermediate occupations	19.4	1.18	0
540	20	33.07	42.49	75.56	35.44	77.93	25.19	.9	2.76	16.25	.81	.82	8.94	1.73	1.34	2.8	1.33	.45	September	-1.99	4	4	0	2	-.17	.05	50.07	Intermediate occupations	51.8	2.5	0
541	20	39.47	44.83	84.3	34.07	78.9	26.28	1.22	3.56	16.74	1.09	1.05	9.54	2	1.87	4.51	3.69	1.42	September	.41	2	4	1	2	.19	.05	31.8	Inactive	40.2	1.99	0
542	20	30.54	42.08	72.62	35.5	77.58	24.99	.86	2.49	16.21	.77	.74	8.79	1.43	1.41	3.77	2.14	1.09	September	-5.69	2	4	1	1	.88	.05	23.62	Managerial & professional occupations	62	3.04	0
543	20	31.89	41.57	73.46	35.88	77.45	25.5	.92	2.9	16.42	.82	.87	9.08	2.23	1.71	3.47	1.6	.43	September	.21	2	4	0	2	.05	.05	47.4	Intermediate occupations	44	2.15	0
544	21	28.15	40.81	68.96	36.22	77.04	24.61	.79	2.3	15.97	.7	.68	8.63	2.16	1.76	3.28	1.92	.85	March	.21	5	2	0	3	-1.33	4.6	15.57	Managerial & professional occupations	90.8	3.82	0
545	21	28.49	41.14	69.63	36.26	77.4	24.77	.82	2.46	16.02	.73	.73	8.74	2.24	1.83	2.67	1.87	.95	March	-2.39	1	2	1	2	-.93	.05	15.57	Intermediate occupations	33.4	1.87	1
546	21	35.63	43.45	79.08	34.34	77.79	24.94	.86	2.43	16.21	.77	.73	8.73	1.98	1.39	1.42	1.17	.57	March	2.01	5	2	1	1	-.64	.1	25.62	Managerial & professional occupations	21.2	.82	0
547	21	28.9	41.23	70.13	36.31	77.54	24.79	.84	2.47	16.05	.75	.73	8.74	1.94	1.72	3.17	2.28	.9	March	-2.49	5	2	0	3	-1.15	.2	26.54	Unclassified [in work,occ unknown]	25	1.22	0
548	21	34.79	43.14	77.93	34.6	77.74	24.97	.88	2.51	16.2	.78	.75	8.78	2.17	1.46	1.72	1.39	.86	March	-2.59	5	2	0	2	-1.54	.3	15.66	Inactive	21.6	2.08	1
549	21	26.84	39.97	66.81	36.77	76.74	24.51	.77	2.26	15.92	.69	.67	8.59	1.44	1.33	3.47	2.21	.87	March	-3.59	4	2	1	2	-1.69	1.5	26.08	Routine & manual occupations	36.8	1.82	1
550	21	29.95	41.7	71.65	36.06	77.76	25.08	.89	2.72	16.15	.8	.8	8.93	1.97	1.53	1.84	1.57	.52	March	2.41	3	2	0	3	-.89	.1	26.54	Intermediate occupations	77.6	2.72	0
551	21	27.07	40.12	67.2	36.73	76.86	24.59	.79	2.32	15.95	.7	.69	8.63	1.82	1.53	2.31	1.72	.81	March	-1.59	4	2	1	2	-1.58	.05	53.16	Managerial & professional occupations	79.4	2.87	0
552	21	36.38	44.98	81.35	34.56	79.54	25.69	1.03	2.99	16.56	.92	.87	9.14	2.39	2.07	2.98	2.63	1.45	March	-5.39	2	2	0	2	-.82	.8	41.11	Routine & manual occupations	27.4	2.08	0
553	21	32.08	41.97	74.04	35.53	77.49	24.89	.84	2.45	16.17	.75	.73	8.72	2.69	2.22	3.48	2.51	1.54	March	6.81	5	2	1	3	-.68	.05	39.95	Managerial & professional occupations	36.6	1.12	0
554	21	28.36	40.83	69.2	36.43	77.26	24.84	.84	2.52	16.06	.75	.75	8.78	1.97	1.07	1.15	.95	.73	March	-5.59	4	2	1	1	-1.04	.2	53.16	Routine & manual occupations	54.6	2.81	1
555	21	31.23	41.69	72.92	35.5	77.19	24.82	.83	2.46	16.07	.74	.73	8.74	1.8	1.53	2.71	1.69	.86	March	-.79	4	2	1	1	-.64	.05	14.93	Routine & manual occupations	25.4	1.37	1
556	21	27.11	40.17	67.28	36.62	76.8	24.51	.77	2.25	15.93	.69	.67	8.59	1.86	1.57	1.76	2.04	1.07	March	.11	4	2	1	2	-1.22	.05	26.08	Inactive	98.60001	6.17	1
557	21	37.43	43.89	81.31	34.11	78	25.19	.91	2.69	16.29	.81	.8	8.9	1.7	1.39	1.87	1.94	.83	March	-1.29	4	2	1	4	-1.8	.05	21.19	Managerial & professional occupations	46.4	2.93	1
558	21	27	40.11	67.1	36.77	76.87	24.58	.79	2.31	15.95	.7	.69	8.63	2.38	2.13	4.71	3.31	1.33	March	4.51	1	2	1	3	-.68	.05	26.54	Managerial & professional occupations	81.6	2.44	1
559	21	32.52	41.81	74.33	35.35	77.16	24.74	.81	2.4	16.05	.72	.71	8.69	2.23	1.97	4.17	2.54	1.11	March	6.31	2	2	0	4	-.71	.05	53.16	Intermediate occupations	57.6	2.32	1
560	21	27.36	40.14	67.5	36.61	76.75	24.51	.77	2.25	15.93	.69	.67	8.59	1.67	1.52	1.92	1.62	1.28	March	3.41	2	2	0	4	-.79	.1	26.08	Inactive	62.4	1.74	0
561	21	26.81	40.05	66.86	36.76	76.81	24.52	.77	2.27	15.93	.69	.68	8.6	2.58	1.91	2.13	2.07	.95	March	6.21	3	2	0	4	-.89	.05	26.08	Intermediate occupations	89	3.3	1
562	22	33.95	44.17	78.12	34.14	78.3	25.42	.96	2.59	16.51	.85	.76	8.92	2.13	2.04	3.09	2.65	1.96	March	-2.89	5	4	0	3	-.03	.3	5.04	Unclassified [in work,occ unknown]	25.8	1.51	0
563	22	28.02	40.79	68.81	36.2	76.98	24.62	.79	2.27	16.01	.71	.68	8.61	2.08	1.71	2.79	2.07	.65	March	2.51	1	1	0	1	1.2	.7	23.01	Intermediate occupations	82.4	3.14	1
564	22	33.34	43.39	76.73	34.74	78.13	25.03	.88	2.51	16.23	.78	.75	8.81	2.48	2.27	4.16	3.09	1.58	March	.01	1	4	0	4	-.21	.05	27.75	Managerial & professional occupations	25	1.43	1
565	22	37.8	45.18	82.98	34.35	79.53	25.74	1.05	3.12	16.53	.94	.92	9.21	2.34	1.99	3.57	2.22	1.05	March	3.31	5	1	1	2	-.32	.5	49.84	Inactive	49.2	2.41	1
566	22	27.81	40.66	68.47	36.27	76.93	24.6	.79	2.26	15.99	.7	.67	8.61	2.27	2.08	4.82	3.44	1.45	March	-.09	5	1	1	1	.84	1.6	23.01	Unclassified [in work,occ unknown]	27.4	1.28
567	22	32.63	43.44	76.06	34.87	78.3	25.17	.91	2.59	16.3	.81	.77	8.88	2.25	2.09	4.41	3.12	1.52	March	-.59	5	1	0	2	.01	.2	21.98	Managerial & professional occupations	20.8	1.27	0
568	22	34.35	43.81	78.16	35.29	79.1	26.08	1.06	3.62	16.54	.94	1.09	9.54	1.77	1.64	3.8	2.2	1.05	March	-2.39	2	4	1	4	.01	.05	44.95	Inactive	60.4	2.64	1
569	22	32.84	43.4	76.24	34.81	78.21	25.1	.89	2.55	16.26	.79	.76	8.84	3.4	2.64	3.75	2.64	1.34	March	8.81	1	1	0	3	.3	.05	13.09	Managerial & professional occupations	61.4	1.84	1
570	22	59.53	58.56	118.09	29.28	87.85	28.46	1.71	4.95	17.74	1.52	1.39	10.72	1.95	1.58	2.92	1.66	.69	March	-3.29	4	1	1	3	.44	.05	44.67	Inactive	22.6	1.71	0
571	22	50.15	51.62	101.76	30.52	82.13	27.33	1.62	3.75	17.54	1.45	1.13	9.79	2.19	2.09	4.19	3.43	1.88	March	4.41	4	4	1	2	-.32	1.8	30.58	Unclassified [in work,occ unknown]	70.2	2.97	0
572	22	30.23	41.99	72.21	35.46	77.45	24.9	.85	2.41	16.17	.75	.72	8.73	2.59	2.06	3.46	2.22	.88	March	2.51	1	1	0	2	-.03	.05	23.62	Managerial & professional occupations	33.2	2.01	1
573	22	33.09	43.54	76.63	34.76	78.3	25.12	.9	2.57	16.27	.8	.76	8.86	2.05	1.58	1.47	1.26	.69	March	5.11	5	1	1	3	-.06	.05	13.09	Intermediate occupations	35.2	1.24	1
574	22	31.35	42.65	74	35.26	77.91	24.94	.85	2.47	16.17	.76	.74	8.77	2.15	2.12	5.42	3.43	1.77	March	1.91	1	4	0	4	-.06	.05	17.66	Managerial & professional occupations	52.2	2.01	1
575	22	30.46	42.12	72.58	35.39	77.51	24.92	.85	2.4	16.19	.76	.71	8.73	2.47	2.2	3.62	2.95	1.55	March	-2.09	1	4	1	2	-.06	.05	21.98	Managerial & professional occupations	40.6	2.47	1
576	22	32.13	42.97	75.1	34.97	77.94	25.03	.87	2.49	16.23	.78	.74	8.8	1.92	1.49	2.54	1.34	.71	March	-.19	1	1	1	3	1.46	.05	13.09	Managerial & professional occupations	40.6	2.02	0
577	22	33.02	43.68	76.7	34.77	78.45	25.24	.92	2.64	16.32	.82	.78	8.91	2.21	1.88	2.86	2.44	1.03	March	-2.49	1	1	0	4	1.31	.6	21.98	Routine & manual occupations	53	2.63	1
578	22	34.39	44.49	78.88	34.11	78.6	25.54	.97	2.76	16.51	.86	.82	9.03	2.13	1.9	3.4	2.51	1.28	March	2.51	5	1	1	2	.26	2	39.93	Intermediate occupations	46.6	1.53	0
579	22	29.55	41.61	71.15	35.68	77.29	24.81	.83	2.36	16.12	.74	.7	8.69	2.88	2.39	3.51	2.33	1.24	March	2.91	1	1	0	4	.05	.05	23.62	Intermediate occupations	63.6	2.25	1
580	22	40.6	45.37	85.97	33.55	78.92	26.25	1.11	3.56	16.71	.99	1.05	9.54	1.66	1.65	3.28	2.18	1.33	March	.81	2	1	1	2	.19	.2	39.95	Routine & manual occupations	22.2	.93	1
581	22	41.09	47.83	88.92	32.68	80.51	26.34	1.15	3.36	16.87	1.02	.98	9.48	2.11	1.85	3.17	2.18	1.09	March	.21	5	1	0	2	.08	.05	41.45	Intermediate occupations	20	1.65	0
582	22	56.69	57.24	113.93	29.55	86.8	27.64	1.63	4.2	17.49	1.45	1.2	10.15	1.91	1.77	3.97	3.34	1.26	March	-.09	5	1	1	2	.41	.1	41.45	Inactive	58.2	2.18	0
583	22	56.69	57.24	113.93	29.55	86.8	27.64	1.63	4.2	17.49	1.45	1.2	10.15	1.76	1.65	4.58	3.2	1.33	March	-2.89	5	4	0	2	.15	.05	41.45	Inactive	20.6	1.47	0
584	22	37.82	45.65	83.47	33.54	79.2	26.04	1.12	3.2	16.71	1	.95	9.33	1.77	1.68	3.61	2.4	1.35	March	.51	5	4	0	2	.23	.1	22.26	Managerial & professional occupations	22.4	1.09	0
585	22	30.89	42.24	73.13	35.41	77.64	25.06	.88	2.54	16.23	.78	.76	8.82	2.12	1.55	1.9	1.47	.52	March	3.91	1	1	0	3	-2.12	.05	23.62	Managerial & professional occupations	62.8	2.31	1
586	22	31.33	42.52	73.85	35.12	77.64	25.01	.87	2.44	16.24	.78	.73	8.77	2.61	2.18	4.11	2.34	1.02	March	2.91	5	1	1	4	.48	.05	22.26	Managerial & professional occupations	64.2	2.6	1
587	22	29.58	41.6	71.17	35.73	77.33	24.77	.82	2.34	16.1	.73	.7	8.67	2.16	1.76	2.91	1.75	.8	March	2.11	1	1	1	3	.08	.05	23.01	Managerial & professional occupations	28.4	1.5	0
588	22	35.18	45.04	80.22	33.89	78.93	25.69	.99	2.88	16.57	.88	.84	9.12	2.24	1.97	3.61	2.27	1.19	March	3.81	5	1	0	2	1.49	.2	39.93	Intermediate occupations	48.8	1.84	1
589	22	40.65	47.73	88.38	32.33	80.07	26.7	1.22	3.08	17.39	1.09	.91	9.32	1.64	1.51	3.75	2.09	1.03	March	-4.29	2	4	1	3	-.03	.05	40.69	Inactive	16	.92	0
590	22	35.45	44.94	80.39	34.34	79.28	25.85	1.01	3.19	16.55	.9	.95	9.3	2.08	1.81	3.15	2.17	1.08	March	.91	5	1	1	4	.15	.2	21.64	Managerial & professional occupations	35.6	1.38	0
591	22	31.63	42.61	74.24	35.25	77.86	25.1	.89	2.55	16.27	.79	.76	8.83	2.17	2	3.83	3.23	1.49	March	3.11	5	1	1	2	1.06	.6	23.62	Managerial & professional occupations	86.8	3.19	0
592	22	35.7	44.25	79.95	34.37	78.62	25.52	.98	2.9	16.46	.88	.88	9.06	1.76	1.55	1.3	2.72	.95	March	-3.69	5	4	1	2	-.13	1.1	27.14	Intermediate occupations	41.8	2.89	0
593	22	31.66	42.57	74.23	35.57	78.14	25.2	.91	2.75	16.25	.81	.83	8.95	2.05	1.88	4.27	3.69	1.45	March	2.21	1	4	1	2	.19	3.1	21.09	Inactive	59.2	2.37	0
594	22	37.27	45.24	82.51	33.59	78.83	25.49	.93	2.61	16.56	.83	.78	8.92	1.9	1.52	2.66	1.47	.72	March	-2.09	5	1	1	1	.01	.05	22.26	Inactive	38.8	1.82	0
595	22	26.65	39.33	65.98	37.09	76.42	24.42	.75	2.28	15.84	.67	.68	8.58	2.04	1.83	3.83	2.89	1.12	March	4.91	2	4	1	2	.12	.05	30.55	Managerial & professional occupations	38.2	1.71	1
596	22	35.43	45.07	80.5	34.27	79.34	25.81	1.01	3.15	16.54	.9	.94	9.28	2.12	1.85	3.28	2.32	1.13	March	-.59	1	4	0	2	-.03	.2	21.64	Routine & manual occupations	79.2	3.09	1
597	22	32.07	42.95	75.01	34.91	77.86	25.11	.9	2.51	16.29	.8	.75	8.82	2.08	1.65	2.84	1.72	.71	March	.91	1	1	1	1	.23	.05	22.26	Managerial & professional occupations	63.8	2.25	1
598	22	38.03	46.78	84.82	33.21	79.99	26.18	1.07	3.29	16.74	.96	.95	9.43	2.51	2.18	4.01	2.92	1.24	March	4.21	2	1	0	3	.55	.05	39.93	Inactive	93.4	3.18	1
599	22	30.21	42	72.21	35.45	77.45	24.88	.84	2.39	16.17	.75	.71	8.72	2.08	1.85	4.27	3.12	1.19	March	.71	2	1	0	3	.23	1.4	23.62	Managerial & professional occupations	67.6	3.53	0
600	23	30.98	42.26	73.24	35.72	77.98	25.11	.88	2.69	16.2	.79	.81	8.91	1.99	1.76	2.28	2.23	1.4	July	5.21	2	1	1	3	.23	.05	21.09	Managerial & professional occupations	93.8	3.11	0
601	23	37.31	46.35	83.66	33.47	79.82	25.85	1.04	3.02	16.62	.93	.88	9.23	2.03	1.9	4.02	2.78	1.4	July	1.11	2	1	1	4	-.03	.05	44.67	Managerial & professional occupations	73.6	2.16	0
602	23	32	42.26	74.26	35.44	77.7	24.84	.79	2.31	16.18	.7	.69	8.66	2.42	2.25	6.13	3.35	1.59	July	.51	4	1	1	4	.23	.1	21.09	Intermediate occupations	40.2	1.53	1
603	23	31.47	42.65	74.12	35.1	77.75	25.01	.87	2.44	16.24	.78	.72	8.77	2.48	1.91	3.18	1.42	.81	July	8.11	1	1	1	4	.3	1	22.26	Inactive	143	4.4	1
604	23	21.35	35.01	56.36	39.97	74.97	23.38	.57	1.75	15.23	.51	.53	8.14	2.48	2.17	4.94	2.54	1.21	July	5.21	2	1	0	4	.26	.05	20.75	Managerial & professional occupations	20.4	.7	0
605	23	30.8	42.17	72.97	35.46	77.63	24.96	.85	2.45	16.2	.76	.73	8.76	2.25	1.85	3.76	1.79	.87	July	-.59	1	1	1	4	.05	.05	21.64	Managerial & professional occupations	42.4	1.66	1
606	23	38	45.33	83.33	34.3	79.63	25.58	1.04	2.98	16.47	.93	.88	9.11	2.37	2.22	5.55	3.76	1.68	July	.51	2	1	0	4	.12	.05	49.84	Intermediate occupations	23.2	1.6	1
607	23	38.02	44.34	82.36	34.05	78.39	25.17	.92	2.61	16.32	.82	.77	8.85	1.78	1.73	3.78	2.73	1.41	July	-3.69	1	1	0	4	-.1	.05	24.22	Managerial & professional occupations	17	1.04	1
608	23	32.18	43.17	75.35	35	78.16	25.18	.9	2.62	16.29	.8	.78	8.89	3.12	2.17	3.1	1.77	.78	July	6.41	4	1	0	4	.08	.05	21.98	Managerial & professional occupations	59.2	1.68	0
609	23	28.24	40.7	68.93	36.39	77.09	24.64	.79	2.33	15.99	.71	.69	8.65	1.93	1.46	2.46	1.24	.61	July	-.79	5	1	1	4	-.13	.05	22.66	Managerial & professional occupations	26.4	1.54	1
610	23	35.45	42.93	78.38	34.86	77.79	24.9	.8	2.38	16.22	.71	.71	8.68	1.6	1.51	3.47	2.74	1.25	July	-2.99	1	1	1	4	-.1	.05	32.03	Managerial & professional occupations	42.6	2.32	1
611	23	33.56	42.17	75.73	35.25	77.42	24.93	.83	2.48	16.19	.74	.74	8.74	2	1.75	5.1	2.76	.92	July	-1.79	5	1	1	4	.12	.2	33.12	Managerial & professional occupations	71.6	3	1
612	23	32.43	43.32	75.75	34.97	78.29	25.12	.9	2.55	16.27	.8	.75	8.85	2.02	1.67	3.54	1.72	.6	July	1.61	2	1	0	4	.05	.05	29.52	Intermediate occupations	21.8	1.24	0
613	23	35.74	44.07	79.82	35.22	79.3	26.16	1.09	3.74	16.47	.97	1.05	9.69	2.8	2.57	4.41	3.58	1.86	July	4.41	5	1	0	4	.3	.05	24.97	Managerial & professional occupations	38.6	1.41	0
614	23	40.75	46.55	87.3	33.27	79.82	26.41	1.18	3.63	16.84	1.05	1.11	9.57	1.69	1.69	4.41	2.29	1.38	July	-3.79	2	1	0	3	.23	.05	15.66	Intermediate occupations	20.2	1.34	0
615	23	31.07	42.2	73.27	35.56	77.76	25.12	.89	2.63	16.26	.8	.8	8.86	2.35	2.08	3.71	2.78	1.28	July	2.21	5	1	1	3	.19	1	31.98	Managerial & professional occupations	30.2	.85	1
616	23	36.16	45.53	81.69	33.84	79.37	25.6	1.02	2.82	16.53	.91	.83	9.07	2	1.89	3.83	2.44	1.31	July	-1.59	1	1	1	3	.26	.05	41.45	Managerial & professional occupations	32.4	.81	0
617	24	34.98	43.06	78.04	34.64	77.7	24.99	.87	2.55	16.19	.78	.76	8.8	2.04	1.68	3.12	1.6	.85	July	.51	2	2	0	4	.48	.05	21.19	Managerial & professional occupations	33.6	1.5	0
618	24	33.16	43.72	76.89	34.56	78.29	25.21	.91	2.57	16.32	.81	.76	8.89	2.28	1.87	2.02	1.83	1.19	July	2.11	5	2	1	2	.52	.05	53.95	Intermediate occupations	27.8	1.28	0
619	24	33.24	43.49	76.73	34.83	78.31	25.09	.88	2.55	16.25	.79	.76	8.83	1.66	1.6	3.81	2.47	1.3	July	-2.49	2	2	1	4	.34	.6	15.54	Inactive	31.6	1.77	0
620	24	34.89	44.59	79.48	34.12	78.71	25.53	.97	2.8	16.49	.87	.84	9.04	1.9	1.88	5.14	3.79	2.02	July	3.91	5	2	1	4	.7	2.1	52.52	Routine & manual occupations	25	1.15	0
621	24	39.68	46.82	86.51	32.83	79.65	25.77	1.06	2.73	16.72	.94	.81	9.05	2.35	2.06	3.23	2.79	1.53	July	3.71	2	2	1	4	.73	.3	42.15	Inactive	44.4	1.26	0
622	24	37.96	45.14	83.1	33.64	78.79	25.46	.98	2.77	16.46	.87	.83	9	2.64	2.39	4.76	3.61	1.49	July	5.61	5	2	0	4	.55	.05	22.08	Routine & manual occupations	68	1.54	0
623	24	38.58	45.61	84.19	33.42	79.03	25.42	.97	2.76	16.43	.87	.82	9	1.93	1.65	3.04	2.57	1.16	July	-4.49	4	2	0	4	.62	.05	27.75	Routine & manual occupations	57.4	2.97	0
624	24	31.95	42.88	74.82	35	77.88	25.03	.87	2.48	16.24	.78	.74	8.79	1.24	1.08	1.45	1.23	.73	July	-4.49	4	2	0	4	.3	.1	13.09	Managerial & professional occupations	21.8	1.43	0
625	24	23.13	36.83	59.96	39.09	75.92	23.83	.62	1.94	15.53	.55	.58	8.3	1.65	1.55	2.97	2.58	1.17	July	-6.19	2	2	0	3	.55	.05	26.02	Intermediate occupations	22.2	1.5	0
626	24	32.03	42.91	74.95	34.99	77.9	25.03	.87	2.48	16.23	.78	.74	8.79	1.67	1.57	4.65	2.79	1.12	July	-.99	5	2	1	4	.19	.05	13.09	Inactive	38.8	2.35	0
627	24	33.85	43.8	77.65	34.68	78.48	25.15	.89	2.59	16.29	.8	.77	8.86	2.01	1.69	2.69	1.47	1.17	July	1.51	2	2	0	4	.7	.7	15.54	Routine & manual occupations	84.8	2.98
628	24	29.68	40.84	70.52	36.48	77.32	25.09	.9	2.81	16.13	.81	.84	8.96	2.01	1.26	2.23	1.49	.8	July	.31	5	2	0	4	.59	.1	41.23	Routine & manual occupations	23.4	1.3	0
629	24	33.89	44.01	77.89	34.36	78.37	25.38	.94	2.68	16.43	.84	.8	8.95	2.31	1.77	3.4	2.12	.32	July	1.71	5	2	0	4	.73	1.7	52.52	Unclassified [in work,occ unknown]	29.8	1.14	1
630	24	34.2	43.27	77.47	34.6	77.87	24.98	.87	2.46	16.22	.78	.73	8.76	3.02	2.3	2.53	2.24	1.26	July	17.01	5	2	0	4	.81	5	19.97	Inactive	38	1.45	0
631	24	60.88	58.7	119.58	29.95	88.65	29.03	1.85	5.7	17.87	1.65	1.66	11.15	2.37	2.19	3.88	3.18	1.49	July	.61	5	2	0	4	.66	.05	38.27	Intermediate occupations	43.4	1.95	0
632	24	39.45	46.28	85.73	33.14	79.42	25.94	1.05	3.03	16.73	.93	.91	9.22	2.13	1.69	2.67	1.67	.63	July	-.19	2	2	0	4	.77	.8	22.27	Inactive	24.8	1.25	0
633	24	33.24	43.71	76.95	34.48	78.19	25.31	.92	2.61	16.4	.82	.77	8.91	2.24	1.82	3.1	2.12	.83	July	3.01	5	2	1	4	.73	1	52.52	Routine & manual occupations	49.4	2.21	1
634	24	43.74	46.8	90.53	32.83	79.62	25.53	1.02	2.82	16.52	.91	.83	9.01	2.54	2.09	2.5	2.2	1.33	July	3.41	1	2	0	4	.77	.5	24.22	Unclassified [in work,occ unknown]	64.4	2.76	0
635	24	39.72	45.77	85.49	33.16	78.93	25.38	.96	2.71	16.41	.85	.8	8.96	2.2	1.9	3.6	2.7	.9	July	-1.19	2	2	0	4	.77	.7	27.75	Unclassified [in work,occ unknown]	38.2	2.27	0
636	24	33.92	42.73	76.65	35.08	77.81	24.99	.87	2.51	16.22	.77	.74	8.77	2.38	2.29	6.1	4.43	2.05	July	3.81	2	2	1	4	.44	.3	39.95	Intermediate occupations	56	2.27	0
637	25	28.32	40.83	69.15	36.18	77.02	24.6	.79	2.29	15.98	.7	.68	8.63	2.27	2	4.4	2.89	1.04	July	.01	1	4	1	4	2.11	.05	14.93	Intermediate occupations	59	2.57	1
638	25	34.18	44.29	78.48	34.16	78.46	25.48	.96	2.72	16.48	.86	.8	9	2.62	2.29	4.03	2.44	1.07	July	3.01	2	4	1	4	2.58	.05	39.23	Routine & manual occupations	95.6	3.36	0
639	25	33.53	43.89	77.42	34.4	78.29	25.36	.93	2.65	16.42	.83	.79	8.94	2.72	2.2	4.22	2.46	.9	July	5.61	1	4	0	3	2.4	.5	52.52	Managerial & professional occupations	47.4	1.79	1
640	25	33.55	43.74	77.3	34.45	78.19	25.28	.92	2.58	16.39	.82	.77	8.89	1.95	1.82	3.31	2.65	1.35	July	-.39	4	4	1	3	2.69	.05	52.52	Intermediate occupations	80.2	3.26	0
641	25	32.74	43.41	76.15	34.7	78.11	25.13	.9	2.53	16.28	.8	.75	8.85	2.08	1.89	4.44	2.79	1.17	July	2.51	2	4	1	2	1.71	1.5	35.59	Intermediate occupations	27.6	.93	1
642	25	33.75	44.07	77.81	34.37	78.44	25.41	.95	2.68	16.44	.85	.79	8.97	1.85	1.59	3.47	2.72	.63	July	-1.99	2	4	0	4	2.47	.1	37.4	Intermediate occupations	40.8	2.27	0
643	25	38.93	46.19	85.11	33.23	79.41	25.6	.95	2.65	16.63	.85	.78	8.97	1.94	1.59	3.4	2.65	.46	July	-3.89	1	4	0	4	2.14	6.1	44.67	Intermediate occupations	36.2	1.78	1
644	25	35.48	45.19	80.67	33.79	78.98	25.65	.99	2.81	16.56	.89	.82	9.09	2.39	1.93	3.09	1.04	1.11	July	-2.49	5	4	0	2	2.79	.3	39.23	Routine & manual occupations	21	.98	1
645	25	38.25	46.56	84.81	33.36	79.92	26.06	1.11	3.19	16.72	.99	.94	9.34	1.93	1.65	3.33	1.79	.9	July	-1.69	5	4	0	3	2.14	.5	37.09	Routine & manual occupations	20.4	.59	1
646	25	40.54	47.96	88.49	32.63	80.58	26.55	1.18	3.55	16.92	1.05	1.03	9.63	2.15	1.73	2.63	1.99	.81	July	-1.09	1	4	1	4	2.69	1.3	44.67	Managerial & professional occupations	88	3.68	1
647	25	35.36	45.07	80.43	33.87	78.95	25.71	1	2.9	16.58	.89	.86	9.13	2.19	1.85	3.18	2.28	1.3	July	1.91	1	4	1	4	2.18	2.4	39.93	Intermediate occupations	53.8	1.63	1
648	25	38.88	47.15	86.03	32.89	80.04	26.2	1.14	3.2	16.83	1.02	.95	9.37	2.28	1.86	3.17	1.83	.91	July	1.51	2	4	0	3	2.87	.3	19.13	Inactive	54.4	2.48	0
649	25	43.71	48.15	91.86	32.31	80.46	26.15	1.07	3.11	16.86	.96	.93	9.29	2.11	1.75	3.48	2.23	.69	July	-1.39	2	4	0	2	2.32	.1	27.75	Intermediate occupations	47.4	2.3	0
650	25	27.83	39.84	67.68	36.81	76.65	24.63	.78	2.37	15.97	.7	.7	8.66	2.4	2.12	3.94	3.22	1.33	July	2.91	4	4	0	4	2.61	.05	47.4	Routine & manual occupations	55.6	1.9	0
651	25	33.42	43.77	77.19	34.46	78.23	25.32	.93	2.63	16.4	.83	.78	8.92	2.09	1.65	3.58	1.61	.67	July	-1.49	2	4	1	4	2.5	.4	52.52	Managerial & professional occupations	26.8	1.29	1
652	25	39.62	45.54	85.16	33.6	79.14	25.6	1	2.85	16.57	.9	.86	9.03	2.29	2.04	3.06	2.47	1.37	July	3.61	2	4	0	4	2.4	.05	24.22	Managerial & professional occupations	116.4	4.75	1
653	25	31.23	42.46	73.69	35.54	78	25.02	.86	2.55	16.19	.77	.76	8.83	3.33	2.66	5.14	2.64	1.15	July	7.41	5	4	0	4	2.79	.05	22.52	Managerial & professional occupations	95.2	3.13	0
654	25	34.52	44.53	79.04	34.1	78.62	25.55	.97	2.78	16.51	.87	.83	9.04	2.79	2.47	3.08	2.6	2.01	July	8.61	4	4	1	4	1.93	.2	39.93	Routine & manual occupations	67.4	2.18	1
655	26	23.31	36.5	59.81	39.08	75.58	23.78	.62	1.99	15.47	.55	.6	8.32	2.6	2.3	3.56	2.86	1.63	November	1.91	1	1	0	2	.15	.05	13.75	Managerial & professional occupations	26.2		0
656	26	22.86	36.22	59.08	39.22	75.44	23.7	.63	1.97	15.4	.56	.59	8.3	2.38	1.66	2.24	1.42	.51	November	.11	1	1	0	3	-.28	.2	9.45	Managerial & professional occupations	89.60001	5.03	1
657	26	26.91	38.48	65.39	38.49	76.97	24.74	.82	2.83	15.84	.73	.88	8.9	2.46	2.09	3.4	2.51	1.16	November	1.71	5	1	1	3	.66	.05	9.42	Unclassified [in work,occ unknown]	18.8		0
658	26	23.96	36.56	60.52	39.04	75.59	23.76	.63	1.97	15.46	.56	.6	8.3	1.56	1.32	2.29	1.41	.72	November	-4.99	3	1	1	1	-.32	.05	14.44	Routine & manual occupations	39	2.35	0
659	26	23.03	36.21	59.24	39.26	75.47	23.69	.61	1.91	15.43	.54	.58	8.26	2.38	2.15	3.55	2.88	1.37	November	1.51	2	1	1	2	-.17	.05	14.44	Inactive	78.6	3.01	0
660	26	26.97	38.1	65.07	38.28	76.38	24.42	.76	2.49	15.75	.68	.77	8.67	1.71	1.46	2.25	1.69	.92	November	-.99	2	1	1	3	.77	.1	13.75	Unclassified [in work,occ unknown]	20.2		0
661	26	23.67	36.51	60.18	39.01	75.52	23.76	.63	1.99	15.45	.56	.6	8.31	2.49	2.06	3.62	2.39	1.02	November	3.41	4	1	1	1	-.28	.05	14.44	Inactive	37.2	1.78	0
662	26	24.86	36.97	61.83	39.01	75.98	24.1	.69	2.33	15.55	.61	.71	8.54	2.22	1.44	2.09	.75	.78	November	-1.99	3	1	1	3	.77	.6	14.12	Routine & manual occupations	66.8		0
663	26	23.07	36.14	59.2	39.28	75.42	23.63	.59	1.84	15.41	.53	.55	8.21	2.18	1.43	3.31	1.22	1.84	November	3.11	2	1	1	3	.77	2.4	13.75	Intermediate occupations	72.4		1
664	26	22.3	35.73	58.03	39.39	75.11	23.46	.58	1.77	15.3	.51	.52	8.16	1.81	1.57	4.15	2.41	.8	November	-.99	4	1	0	2	-.17	.05	22.42	Intermediate occupations	63	2.8	0
665	26	22.3	35.95	58.24	39.52	75.47	23.65	.6	1.88	15.41	.54	.57	8.24	2.06	1.34	1.58	1.24	.25	November	-2.19	2	1	1	1	-.24	.05	12.23	Routine & manual occupations	31.6	1.33	0
666	26	22.95	36.17	59.12	39.33	75.51	23.65	.62	1.98	15.34	.55	.59	8.31	2.01	1.76	3.9	2.65	.97	November	.01	2	1	1	2	.77	.1	26.55	Intermediate occupations	59.4		0
667	26	23.61	35.72	59.32	39.4	75.12	23.5	.56	1.78	15.35	.5	.54	8.14	2.49	2.06	3.74	2.32	1.07	November	-3.69	3	1	0	1	-.21	.05	11.71	Managerial & professional occupations	31	1.6	0
668	26	27.23	38.26	65.49	38.29	76.55	24.4	.75	2.52	15.72	.67	.78	8.68	2.56	2.1	4.22	2.51	.93	November	-2.49	2	1	0	3	.48	1.3	12.23	Unclassified [in work,occ unknown]	24.2
669	26	24.4	36.95	61.35	38.84	75.8	23.95	.66	2.14	15.53	.59	.65	8.42	2.24	1.98	3.91	3.1	1.12	November	.81	2	1	1	2	.01	.05	14.44	Intermediate occupations	17.5		0
670	26	22.32	35.85	58.16	39.5	75.35	23.63	.61	1.93	15.36	.54	.58	8.27	2.32	1.85	3.18	1.85	.78	November	1.61	5	1	1	3	.66	.05	9.42	Managerial & professional occupations	54.8		1
671	26	21.95	35.49	57.44	39.66	75.15	23.51	.58	1.84	15.3	.52	.55	8.2	2.21	1.65	2.77	1.6	.6	November	2.21	5	1	0	3	-.5	.05	13.24	Managerial & professional occupations	52.4	1.7	1
672	26	26.37	37.42	63.79	38.55	75.96	23.76	.59	1.83	15.54	.52	.55	8.22	2.52	1.87	2.86	1.61	.61	November	1.11	3	1	0	2	-.24	.05	22.45	Routine & manual occupations	36.4	1.46	0
673	26	23.98	36.57	60.54	38.92	75.49	23.74	.63	1.97	15.44	.56	.59	8.3	2.38	1.76	2	1.68	1.03	November	4.51	3	2	0	1	-.28	.05	14.44	Intermediate occupations	53.8	1.79	0
674	26	25.57	37.44	63.01	38.6	76.04	24.03	.73	2.17	15.58	.65	.66	8.45	2.27	2.01	2.44	2.49	1.49	November	-.89	3	1	0	2	-.32	.05	14.44	Inactive	35.8	1.37	0
675	26	13.57	29.02	42.58	44.48	73.49	22.27	.38	1.16	14.63	.34	.34	7.65	1.72	1.51	3.37	2.51	.82	November	-7.79	3	1	0	1	-.6	.05	8.83	Managerial & professional occupations	22.2	1.6	0
676	26	26.6	38.26	64.87	38.49	76.76	24.47	.76	2.59	15.75	.68	.8	8.72	1.11	.96	1.74	1.16	.53	November	-9.09	3	1	1	1	.77	.3	12.23	Intermediate occupations	22		0
677	26	29.94	39.93	69.87	37.61	77.54	25.46	.93	3.45	16.09	.83	1.03	9.37	1.52	1.27	2.23	1.56	.88	November	-8.09	5	1	0	2	-.28	.2	9.45	Managerial & professional occupations	26.2		0
678	26	23.89	36.79	60.68	38.94	75.73	23.89	.64	2.09	15.51	.57	.64	8.38	1.77	1.48	1.97	1.72	.98	November	-4.59	3	1	1	1	-.57	.05	13.75	Managerial & professional occupations	37	1.83	0
679	26	27.34	38.61	65.95	37.96	76.58	24.48	.74	2.59	15.75	.66	.8	8.73	1.29	1.27	3.17	2.03	1.17	November	-5.69	3	1	0	2	.59	.6	13.91	Managerial & professional occupations	30.4		0
680	26	34.68	41.01	75.69	36.64	77.65	25.79	1.05	3.62	16.31	.93	1.1	9.49	1.83	1.59	3.48	2.47	.83	November	-4.89	5	1	0	3	-.28	.05	14.44	Unclassified [in work,occ unknown]	27	1.57	0
681	26	25.47	37.42	62.89	38.61	76.02	24.13	.69	2.26	15.62	.62	.69	8.51	3.14	2.39	4.03	2.32	1.21	November	1.21	1	1	0	1	.62	.1	13.75	Managerial & professional occupations	48.4		0
682	26	24.99	36.67	61.66	38.85	75.52	23.74	.62	2.01	15.42	.55	.6	8.32	1.74	1.49	1.7	1.87	1.03	November	-2.19	4	1	0	2	-.32	.2	9.42	Routine & manual occupations	73	2.66	0
683	27	20.23	34.68	54.9	40.36	75.04	23.35	.57	1.75	15.2	.51	.51	8.15	1.46	1.23	2.06	1.5	.63	November	-4.29	2	2	1	1	.3	.05	29.13	Unclassified [in work,occ unknown]	93.39999	5.07	0
684	27	20.02	34.55	54.57	40.41	74.96	23.31	.56	1.72	15.19	.5	.5	8.12	1.98	1.97	4.49	3.59	1.82	November	-3.59	4	2	1	2	.48	1.7	34.91	Routine & manual occupations	34.8	2.7	0
685	27	19.03	34.23	53.26	40.47	74.7	23.18	.52	1.58	15.16	.46	.46	8.03	1.79	1.63	3.44	2.5	1.08	November	-7.89	5	2	0	1	.59	.3	16.18	Managerial & professional occupations	20	1.39	1
686	27	22.84	36.31	59.15	39.6	75.9	23.93	.69	2.21	15.45	.61	.66	8.48	2.49	2.18	3.51	2.95	1.28	November	-.09	1	2	0	3	.26	1.2	45.02	Routine & manual occupations	33.2	1.74	1
687	27	19.79	34.39	54.18	40.44	74.83	23.24	.54	1.66	15.16	.48	.49	8.08	1.98	1.95	3.94	3.24	1.67	November	.41	3	2	0	3	.55	.05	34.91	Intermediate occupations	61.6	2.46	0
688	27	19.05	34.22	53.27	40.61	74.83	23.26	.55	1.67	15.17	.49	.49	8.09	2.65	1.98	2.82	1.93	.75	November	1.51	1	2	0	3	.59	4.6	34.91	Inactive	91.4	3.39	1
689	27	18.18	33.6	51.78	41.05	74.65	23.1	.53	1.61	15.07	.47	.47	8.03	1.95	1.81	3.04	1.83	1.42	November	-1.89	5	2	1	3	-.1	.1	21.52	Routine & manual occupations	46.8	1.54	0
690	27	21.26	35.3	56.56	40.05	75.35	23.57	.62	1.92	15.3	.55	.57	8.27	2.55	2.18	3.77	2.73	1.23	November	3.01	5	2	1	1	.44	.5	34.91	Routine & manual occupations	92.8	3.16	0
691	27	19.76	34.47	54.23	40.47	74.94	23.3	.56	1.71	15.18	.5	.5	8.12	1.81	1.8	3.95	3.04	2.06	November	-.49	4	2	1	2	.62	.05	29.13	Managerial & professional occupations	53.6	2.11	1
692	27	23.15	36.21	59.36	39.57	75.78	23.71	.65	2.04	15.36	.58	.6	8.35	1.96	1.88	4.16	2.37	1.34	November	-1.89	4	2	0	2	.7	.05	45.02	Routine & manual occupations	49.8	1.8	0
693	27	28.17	39.17	67.35	38.43	77.6	24.63	.82	2.79	15.74	.73	.83	8.89	2.39	1.58	2.38	1.18	.37	November	-5.99	1	2	0	3	.62	21.3	36	Inactive	33.2	1.49	0
694	28	22.71	36.21	58.92	39.56	75.77	23.93	.69	2.19	15.48	.61	.66	8.45	2.16	1.83	2.4	2.14	1.18	November	2.11	1	1	1	1	-.75	1.7	17.99	Unclassified [in work,occ unknown]	75	4.01	1
695	28	20.1	34.54	54.64	40.43	74.97	23.32	.58	1.73	15.19	.51	.5	8.13	2.27	2.04	3.62	2.52	1.35	November	-2.49	3	1	0	2	-.68	.05	26.83	Managerial & professional occupations	16.8	.86	0
696	28	20.8	34.94	55.74	40.12	75.06	23.44	.57	1.78	15.28	.51	.53	8.16	1.91	1.61	3.47	1.85	.77	November	-3.09	1	1	1	1	-.68	3.1	35.04	Intermediate occupations	50.2	2.36	1
697	28	22.04	35.54	57.59	40.03	75.58	23.66	.67	2	15.32	.6	.57	8.34	1.97	1.72	3.35	2.42	1.05	November	-2.09	1	1	1	3	-.79	.3	48.55	Routine & manual occupations	27.6	1.17	0
698	28	23.19	36.36	59.55	39.47	75.83	23.84	.69	2.12	15.42	.61	.62	8.43	2.62	1.6	2.63	1.07	.43	November	-3.29	1	1	0	2	-.64	.6	18.67	Inactive	32.2	1.49	1
699	28	18.95	34.05	53	40.74	74.79	23.22	.55	1.65	15.15	.49	.48	8.07	1.84	1.51	2.57	1.92	.69	November	-3.29	2	1	1	1	-.79	.4	26.83	Routine & manual occupations	45.2	2.25	0
700	28	19.86	34.45	54.31	40.43	74.88	23.3	.55	1.69	15.21	.49	.5	8.1	2.34	1.9	2.99	2.43	.83	November	-.59	1	1	1	2	-.75	2.7	28.6	Intermediate occupations	34	.37	1
701	28	20.29	34.3	54.59	40.52	74.82	23.19	.52	1.59	15.16	.47	.47	8.02	2.03	1.86	2.58	2.61	1.74	November	5.61	2	1	1	2	-.82	.5	48.55	Inactive	70.8	2.5	0
702	28	20.07	34.52	54.59	40.62	75.14	23.46	.6	1.91	15.22	.53	.56	8.24	2.51	2.02	3.36	2.3	.89	November	-.89	1	1	1	1	-.89	1.2	29.13	Routine & manual occupations	48	2.37	1
703	28	20.14	34.49	54.63	40.41	74.9	23.28	.56	1.7	15.18	.5	.5	8.1	2.49	2.24	4.48	3.78	1.08	November	-1.09	1	1	1	2	-.64	3	26.83	Routine & manual occupations	45.6	1.92	1
704	28	19.6	34.24	53.84	40.59	74.83	23.23	.55	1.67	15.16	.49	.49	8.08	2.49	2.05	3.46	2.26	1.05	November	.71	5	1	0	3	-.86	.05	48.55	Managerial & professional occupations	70.8	2.5	1
705	28	24.68	37.77	62.45	38.02	75.8	23.77	.62	1.91	15.48	.55	.56	8.29	2.8	1.98	2.32	2.25	.79	November	4.81	5	1	0	1	-.68	.05	26.46	Routine & manual occupations	39.2	1.79	0
706	28	19.37	34.11	53.48	40.68	74.79	23.21	.53	1.62	15.16	.47	.48	8.05	1.95	1.11	1.74	.57	.84	November	-3.09	3	1	0	1	-.79	2	28.6	Routine & manual occupations	21.8	.72	0
707	28	21.22	34.85	56.07	40.13	74.98	23.33	.54	1.66	15.25	.48	.49	8.08	3.08	2.33	.47	.86	1.68	November	.11	2	1	0	2	-.68	.05	35.04	Routine & manual occupations	19.2	.97	0
708	28	19.79	34.39	54.18	40.44	74.83	23.24	.54	1.66	15.16	.48	.49	8.08	2.45	2.03	3.63	2.58	1.22	November	2.71	1	1	0	1	-.71	.4	34.91	Intermediate occupations	45	1.61	1
709	28	20.33	34.86	55.19	40.23	75.08	23.4	.58	1.77	15.25	.51	.52	8.16	1.95	1.64	3.06	2.32	.68	November	-1.79	4	1	0	1	-.86	.05	18.67	Routine & manual occupations	70.4	2.24	0
710	29	23.17	36.51	59.67	38.93	75.43	23.59	.6	1.86	15.35	.53	.54	8.25	1.85	1.72	3.32	2.65	1.22	November	5.71	3	2	1	2	-1.18	.05	21.55	Managerial & professional occupations	107.8	3.85	0
711	29	19.59	34.5	54.09	40.26	74.76	23.22	.53	1.6	15.18	.47	.47	8.04	2.32	2.08	4.02	3.01	1.33	November	4.61	3	3	0	2	-1.36	.5	16.18	Inactive	100.6	4	1
712	29	40.96	43.84	84.79	34.29	78.13	25.08	.87	2.83	16.17	.77	.9	8.9	2.34	1.93	3.03	2.07	1.06	November	2.21	3	2	1	2	-1.07	1.4	48.55	Inactive	56.2	2.29	0
713	29	23.12	36.58	59.7	38.87	75.45	23.61	.6	1.85	15.36	.53	.54	8.25	2.06	1.96	3.7	2.97	1.51	November	5.21	3	2	1	1	-1.22	.2	18.84	Inactive	49	1.83	0
714	29	48.25	49.09	97.34	33.22	82.31	26.93	1.11	4.25	16.92	.99	1.27	10.01	2.11	2	3.57	2.95	1.54	November	-4.89	3	2	0	3	-1.15	.05	29.79	Intermediate occupations	23.4	1.24	1
715	29	21.47	35.57	57.04	39.76	75.33	23.68	.62	1.99	15.36	.55	.59	8.32	1.62	1.51	2.67	1.92	1.09	November	-6.49	3	3	1	1	-1.69	.05	30.29	Routine & manual occupations	106.8	6.34	0
716	29	34.46	42.9	77.36	35.9	78.79	25.73	.95	3.56	16.28	.85	1.08	9.45	1.42	1.26	2.63	1.55	.71	November	-3.29	4	2	1	1	-1	.05	49.42	Routine & manual occupations	32.2	2.27	0
717	29	26.17	38	64.17	37.77	75.77	23.76	.62	1.9	15.48	.55	.56	8.28	2.34	1.88	3.69	2.12	.74	November	6.11	4	3	0	3	-1.54	.05	49.42	Unclassified [in work,occ unknown]	75.6	2.11	0
718	29	25.46	38.07	63.54	37.98	76.05	23.86	.64	1.98	15.51	.57	.58	8.34	2.08	1.76	3.31	1.64	1.08	November	-2.89	3	2	0	1	-.97	.05	21.21	Managerial & professional occupations		3.25	0
719	29	27.37	38.12	65.49	37.95	76.07	23.94	.67	2.1	15.52	.6	.61	8.42	2.63	2.33	4.37	3.71	1.42	November	7.91	3	3	1	2	-1.47	.1	34.21	Managerial & professional occupations	72	1.88	0
720	29	23.11	36.49	59.6	38.95	75.44	23.63	.61	1.89	15.36	.54	.55	8.27	1.53	1.46	3.49	2.45	1.02	November	-2.79	3	2	0	3	-.97	.1	21.7	Routine & manual occupations	69.8	1.99	0
721	29	27.51	38.47	65.98	37.44	75.91	23.84	.63	1.96	15.52	.56	.58	8.32	1.92	1.75	2.33	2.3	1.53	November	-2.39	3	3	1	1	-1.47	.05	49.42	Inactive	45	2.18	0
722	29	24.72	37.57	62.29	38.16	75.73	23.75	.62	1.91	15.47	.55	.57	8.28	2.31	1.79	1.73	1.84	1.06	November	4.81	2	2	1	3	-.97	.7	49.42	Inactive	105.8	4.12	0
723	29	25.13	37.68	62.8	38.05	75.73	23.74	.61	1.9	15.47	.55	.56	8.27	1.72	1.55	2.77	2.25	1.09	November	-2.29	3	2	1	3	-1.18	1.6	42.99	Inactive	46.8	2.01	1
724	29	25.36	38.04	63.4	37.89	75.93	23.83	.63	1.94	15.51	.56	.58	8.32	1.99	1.79	2.05	2.35	1.06	November	3.21	2	3	1	3	-1.15	.2	41	Unclassified [in work,occ unknown]	55	1.63	0
725	29	27.23	38.78	66.01	37.53	76.31	24.11	.68	2.2	15.62	.6	.66	8.49	2.13	1.74	3.02	1.83	.88	November	2.71	3	3	0	3	-1.33	1.2	34.98	Intermediate occupations	49	1.73	0
726	29	24.52	37.48	62	38.26	75.74	23.74	.62	1.9	15.46	.55	.56	8.29	1.72	1.71	3.49	3.38	1.83	November	-3.49	3	2	0	2	-.93	.2	42.99	Routine & manual occupations	47.8	2.07	0
727	29	24.81	37.6	62.41	38.25	75.85	23.81	.64	1.97	15.48	.57	.58	8.34	1.27	1.13	2.03	1.33	.76	November	-3.49	2	2	0	3	-.97	.05	42.99	Managerial & professional occupations	55.6	2.78	0
728	29	25.13	37.68	62.8	38.05	75.73	23.74	.61	1.9	15.47	.55	.56	8.27	1.41	1.39	3.68	2.56	1.36	November	-2.09	3	2	1	3	-.97	1.3	42.99	Inactive	38.4	2.16	1
729	29	32.4	42.77	75.17	35.19	77.96	25.03	.89	2.66	16.15	.79	.79	8.88	1.83	1.61	2.41	1.71	1.07	November	-.79	2	3	1	1	-1.22	.05	38	Unclassified [in work,occ unknown]	47.2	2.9	0
730	29	24.86	37.72	62.58	38.1	75.82	23.8	.62	1.94	15.49	.56	.58	8.31	1.8	1.67	3.08	2.86	1.2	November	-2.49	2	3	1	3	-1.58	.05	49.42	Inactive	26.4	1.49	0
731	29	26.19	38.44	64.64	37.76	76.2	24.04	.66	2.14	15.59	.59	.64	8.45	1.55	1.37	2.39	1.8	.88	November	-4.29	3	2	1	1	-1.04	.1	49.42	Intermediate occupations	24	.81	0
732	29	25.33	37.77	63.1	38.01	75.78	23.78	.62	1.93	15.48	.55	.57	8.3	2.37	2.2	5.69	3.48	1.52	November	-.69	1	2	0	1	-.89	.05	49.42	Managerial & professional occupations	86	3.18	1
733	29	37.16	43	80.16	35.12	78.12	24.62	.74	2.35	16	.66	.71	8.62	1.68	1.61	3.77	3.13	1.28	November	2.01	2	2	1	1	-1.07	5.1	36.63	Inactive	77.8	2	0
734	30	24.21	37.34	61.56	38.77	76.11	23.81	.63	2.06	15.41	.56	.59	8.4	2.31	2.18	5.44	3.8	1.68	April	2.21	1	1	1	4	-1.33	14.2	18.4	Routine & manual occupations	47.4	1.78	1
735	30	22.01	36.02	58.03	39.48	75.51	23.66	.62	1.97	15.35	.56	.58	8.32	1.76	1.59	3.35	2.44	.97	April	2.51	3	3	1	4	-.75	.2	28.05	Intermediate occupations	28	.75	0
736	30	27.71	38.55	66.26	37.4	75.95	23.87	.63	1.99	15.53	.57	.59	8.34	1.79	1.21	1.66	1.06	.55	April	3.71	4	3	1	4	-.75	.2	34.98	Intermediate occupations	108.4	5.25	0
737	30	29.07	40.62	69.68	36.92	77.53	24.78	.79	2.74	15.88	.71	.8	8.9	1.96	1.87	3.01	2.53	1.53	April	1.01	1	3	0	4	-.64	5.1	20.69	Routine & manual occupations	28	.76	1
738	30	23.66	37.02	60.69	38.63	75.65	23.71	.62	1.9	15.42	.55	.56	8.29	1.83	1.65	3.36	2.61	1.07	April	1.81	4	1	0	3	-.89	.1	16.49	Routine & manual occupations		3.76	0
739	30	35.17	43.05	78.22	36.04	79.1	25.62	1.08	3.37	16.26	.96	1	9.37	2.7	2.28	3.7	2.91	1.17	April	7.11	3	1	0	3	-1.36	.05	23.9	Managerial & professional occupations	34.8	1.64	0
740	30	24.15	37.28	61.43	38.51	75.79	23.76	.63	1.94	15.44	.56	.57	8.32	1.42	1.39	2.9	2.52	1.26	April	-7.49	4	1	1	4	-.6	.1	16.49	Inactive	25	1.47	0
741	30	26.04	38.82	64.86	38.19	77.01	24.36	.72	2.49	15.63	.64	.7	8.73	2.12	1.84	3.19	2.29	1.07	April	3.21	3	1	0	3	-.35	.5	14.94	Intermediate occupations	119	4.42	0
742	30	19.58	34.78	54.36	40.71	75.49	23.27	.52	1.71	15.14	.46	.48	8.13	1.87	1.54	2.64	1.51	.87	April	.61	3	1	1	2	-.35	.5	13.86	Managerial & professional occupations	84.2	3.28	0
743	30	24.52	37.05	61.58	38.62	75.67	23.67	.61	1.91	15.38	.54	.56	8.29	1.55	1.37	3.3	1.7	.77	April	1.91	3	3	0	3	-.97		18.4	Intermediate occupations	93.6	3.42	0
744	30	23.44	37.03	60.47	38.71	75.74	23.78	.63	1.97	15.45	.56	.58	8.33	2.25	1.88	3.06	2.76	.99	April	4.71	3	3	0	4	-.86	.05	14.94	Intermediate occupations	99.8	3.91	0
745	30	44.12	46.75	90.87	34.68	81.43	27.01	1.4	4.44	16.86	1.25	1.31	10.16	2.11	1.85	4.45	2.33	1.09	April	8.91	3	3	0	3	-.68	.1	23.9	Routine & manual occupations	93.6	3.15	0
746	30	22.3	35.95	58.24	39.52	75.47	23.65	.6	1.88	15.41	.54	.57	8.24	1.67	1.56	2.78	1.96	1.08	April	-5.09	2	3	0	4	-.64	.1	12.23	Routine & manual occupations	31	1.9	0
747	30	20.64	35.04	55.67	40.07	75.11	23.46	.58	1.81	15.27	.52	.54	8.2	2.74	2.27	3.94	2.93	.94	April	3.71	3	1	1	4	-.82	.05	26.76	Managerial & professional occupations	98.4	2.62	1
748	30	23.67	36.79	60.47	38.79	75.58	23.66	.61	1.9	15.37	.54	.55	8.28	2.23	1.87	3.73	2.12	1.02	April	1.11	4	1	0	2	-.82	.05	18.99	Inactive	65.6	2.12	0
749	30	24.81	37.6	62.41	38.25	75.85	23.81	.64	1.97	15.48	.57	.58	8.34	2.03	1.9	3.81	3	1.37	April	4.01	3	1	0	2	-1.26	.2	42.99	Managerial & professional occupations	114	6.86	0
750	30	24.53	37.3	61.83	38.51	75.81	23.85	.64	2.05	15.47	.57	.61	8.38	1.44	1.34	2.62	2.44	1.09	April	2.21	3	1	1	2	-1.18	1	21.7	Managerial & professional occupations	122	5.56	0
751	30	28.65	39.74	68.39	36.89	76.63	24.05	.63	1.94	15.7	.57	.58	8.35	1.89	1.7	3.75	2.68	1.03	April	-3.89	3	3	0	4	-.71	.4	39.61	Unclassified [in work,occ unknown]	18.4	1.39	0
752	30	20.73	35.49	56.22	39.66	75.15	23.43	.57	1.76	15.26	.51	.52	8.16	2.46	1.88	3.25	1.77	.56	April	-1.09	2	1	1	2	-1.22	.6	35.77	Routine & manual occupations	91.8	3.97	0
753	30	25.75	37.86	63.61	37.91	75.77	23.78	.62	1.92	15.48	.55	.57	8.3	2.1	1.62	2.72	1.64	.7	April	-2.49	2	3	0	4	-.75	1.8	49.42	Inactive	18.2	.8	0
754	30	24.11	37.05	61.16	38.66	75.71	23.72	.61	1.95	15.4	.55	.57	8.32	2.17	1.64	3.04	1.61	.53	April	2.81	3	1	0	2	-.82	.1	18.99	Routine & manual occupations	118.8	3.26	0
755	30	23.29	36.57	59.86	38.87	75.43	23.6	.6	1.86	15.35	.53	.54	8.25	1.84	1.48	2.59	1.78	.65	April	4.21	1	3	1	4	-.71	.4	18.84	Intermediate occupations	49.6	1.36	1
756	30	24.83	37.7	62.53	38.18	75.88	23.88	.64	2.02	15.51	.57	.6	8.37	1.17	1.17	2.49	1.61	.99	April	-2.49	3	3	0	4	-.71	.2	34.98	Managerial & professional occupations	19.8	1.1	0
757	30	22.48	36.65	59.13	38.97	75.62	23.72	.62	1.92	15.42	.55	.57	8.3	1.62	1.37	3.21	1.63	.62	April	-5.69	2	1	1	2	-1.18	1.5	14.94	Managerial & professional occupations	56.6	3	0
758	30	25.16	37.71	62.86	38.21	75.92	23.89	.65	2.04	15.5	.58	.6	8.38	1.85	1.68	3.48	2.61	1.4	April	-.69	3	1	0	4	-1	.05	16.49	Routine & manual occupations	83.6	3.04	0
759	30	23.32	36.75	60.07	38.94	75.69	23.72	.62	1.97	15.38	.55	.57	8.34	2.54	2.29	4	3.21	1.56	April	6.21	3	3	1	4	-.68	.05	18.99	Inactive	38.8	1.52	0
760	30	24.49	37.48	61.97	38.21	75.69	23.72	.61	1.88	15.45	.55	.56	8.26	2.28	1.88	3.59	2.62	.92	April	.01	2	1	0	4	-.46	.1	42.99	Managerial & professional occupations	115.2	3.17	0
761	30	23.1	36.8	59.89	38.92	75.71	23.68	.61	1.91	15.39	.54	.56	8.29	2.52	2.12	4.2	2.41	1.08	April	1.71	3	1	0	4	-1.18	.2	18.4	Intermediate occupations	32.6	1.16	0
762	30	24.15	37.28	61.43	38.51	75.79	23.76	.63	1.94	15.44	.56	.57	8.32	1.18	1.02	1.45	1.04	.71	April	-8.79	4	1	0	4	-.46	.2	16.49	Unclassified [in work,occ unknown]	21.2	2.22	0
763	30	25.62	38.26	63.88	38.48	76.75	24.04	.66	2.26	15.47	.59	.64	8.56	1.4	1.32	2.51	2.31	1.15	April	-5.89	3	1	1	4	-1.29	.2	16.74	Intermediate occupations	56.8	2.65	0
764	30	27.5	38.62	66.11	37.83	76.45	24.33	.75	2.38	15.7	.67	.7	8.62	2.12	1.85	1.97	1.98	1.46	April	-3.39	2	3	0	4	-.57	.3	28.71	Inactive	15	.43	0
765	30	19.28	34.09	53.37	40.76	74.85	23.24	.56	1.72	15.13	.5	.5	8.11	1.93	1.62	2.88	1.6	1.04	April	1.51	3	3	1	4	-.57	.05	29.13	Routine & manual occupations	54.2	2.83	1
766	30	27.18	38.9	66.08	37.95	76.85	24.31	.7	2.45	15.6	.63	.69	8.71	2.16	1.69	3.43	1.56	.72	April	-1.19	2	3	0	2	-.57	.05	18.99	Managerial & professional occupations	16.8	.78	0
767	30	25.51	37.95	63.46	38.13	76.08	23.92	.67	2.05	15.52	.6	.6	8.39	1.79	1.57	3.23	2.33	1.04	April	-3.39	3	1	0	4	-1.44	.2	24.71	Intermediate occupations	30.8	1.73	0
768	30	19.95	34.64	54.58	40.26	74.9	23.32	.55	1.7	15.2	.49	.5	8.11	1.65	1.37	3.5	2.13	.57	April	-2.89	3	1	1	2	-.71	.3	34.6	Routine & manual occupations	47.6	2.18	0
769	30	23.31	37.03	60.34	38.75	75.78	23.75	.62	1.93	15.45	.56	.57	8.3	1.89	1.69	3.51	2.57	1.1	April	-.49	4	1	1	2	-1.26	.05	14.94	Routine & manual occupations	84.8	3.48	0
770	30	22.9	36.59	59.49	38.94	75.53	23.63	.6	1.87	15.37	.54	.55	8.26	2.44	1.81	2.98	1.68	.59	April	4.71	5	1	1	4	-1.07	3.1	18.99	Routine & manual occupations	76.8	2.97	1
771	31	29.37	40.58	69.95	36.7	77.28	24.43	.72	2.3	15.84	.64	.68	8.59	1.71	1.55	2.07	1.83	1.16	April	-3.19	5	2	1	3	-1.83	.05	31.65	Intermediate occupations	23.8	1.87	0
772	31	23.74	38	61.74	38.02	76.02	24.1	.67	2.03	15.71	.6	.61	8.39	3.76	3.65	6.31	4.99	2.74	April	-.79	5	2	0	3	-1.07	.05	6.86	Managerial & professional occupations	22	1.41	0
773	31	24.26	38.15	62.41	37.91	76.07	24.03	.66	2.02	15.65	.59	.6	8.38	2.12	1.62	2.06	1.34	.79	April	4.01	3	2	1	4	-1	.1	12.91	Managerial & professional occupations	75.6	2.58	0
774	31	29.55	39.72	69.28	36.62	76.34	24.12	.68	2.09	15.71	.6	.63	8.42	2.1	1.88	3.61	2.39	1.13	April	-1.29	1	2	0	3	-1.04	.05	17.72	Routine & manual occupations	21.4	.91	0
775	31	25.42	38.47	63.89	37.62	76.08	24.03	.66	2.02	15.65	.59	.61	8.38	2.19	1.96	3.2	2.36	1.36	April	2.21	1	2	1	3	-.86	.05	12.91	Managerial & professional occupations	40.2	1.67	1
776	31	25.19	38.74	63.92	37.72	76.46	24.4	.72	2.3	15.84	.65	.7	8.56	2.4	2.1	3.9	2.7	1.19	April	-.99	1	2	1	2	-.97	.05	5.85	Managerial & professional occupations	23.6	1.12	1
777	31	27.24	38.72	65.95	37.32	76.04	23.99	.67	2.07	15.59	.6	.62	8.4	1.73	1.41	1.26	2.01	.79	April	-1.39	5	2	1	3	-1.51	.05	9.01	Managerial & professional occupations	38.8	2.06	1
778	31	40.28	44.34	84.62	34.38	78.72	24.82	.72	2.21	16.25	.64	.66	8.57	2.51	2.07	3.3	2.21	1.3	April	2.61	1	2	0	4	-.79	.3	14.22	Managerial & professional occupations	18.6	.94	1
779	31	37.72	44.32	82.04	34.91	79.22	25.76	.98	3.44	16.37	.87	1.04	9.39	2.28	1.97	4.15	2.73	1.08	April	3.81	1	2	1	2	-1.87	2.6	20.95	Intermediate occupations	46.4	1.69	1
780	31	30.63	41.36	71.99	35.77	77.13	24.6	.8	2.37	15.94	.72	.71	8.65	2.21	2.08	4.8	3.21	1.68	April	4.61	4	2	0	2	-1	.05	45.25	Intermediate occupations	45.4	1.82	0
781	31	29.95	39.53	69.49	36.56	76.09	23.97	.65	1.97	15.64	.58	.59	8.33	1.73	1.6	3.77	2.35	1	April	-2.19	1	2	1	2	-1	.1	16.18	Intermediate occupations	72	3.81	0
782	31	26.72	39.39	66.11	37.25	76.63	24.61	.78	2.45	15.92	.7	.75	8.69	2.99	2.32	4.01	2.39	1.05	April	7.61	1	2	1	1	-2.34	3.8	5.85	Intermediate occupations	88.6	2.91	0
783	31	26.97	38.68	65.65	37.29	75.97	23.88	.64	1.95	15.57	.57	.58	8.31	1.97	1.84	3.45	2.39	1.19	April	-4.69	1	2	1	2	-1.33	3.4	17.72	Routine & manual occupations	26.8	1.28	1
784	31	24.54	38.35	62.89	37.84	76.19	24.16	.69	2.13	15.71	.62	.64	8.45	2.43	2.01	3.15	1.92	1.31	April	.91	1	2	1	2	-.97	.05	5.85	Managerial & professional occupations	54.2	2.49	1
785	32	21.96	36.3	58.26	39.2	75.5	23.71	.63	1.95	15.41	.56	.58	8.3	1.08	1.01	2.34	1.53	.69	March	-5.49	2	1	0	3	-.5	1.1	13.56	Intermediate occupations	37.6	2.11	0
786	32	36.09	42.06	78.15	35.73	77.8	25.25	.95	3.1	16.08	.85	.9	9.17	1.73	1.4	3.69	1.26	.2	March	-1.79	2	1	0	2	-.24	.7	38.21	Routine & manual occupations	34.6	.42	0
787	32	25.22	37.65	62.88	38.24	75.89	23.99	.69	2.14	15.55	.61	.63	8.44	1.35	1.31	3.94	2.69	1.05	March	-6.59	3	1	1	1	-.46	.05	20.67	Routine & manual occupations	40.8	2.07	0
788	32	27.16	38.76	65.91	37.81	76.57	24.47	.79	2.53	15.73	.7	.74	8.74	1.99	1.74	3.52	2.39	1	March	2.61	1	1	1	2	-.42	.05	13.56	Managerial & professional occupations	46.4	2.26	1
789	32	23.48	37.01	60.49	38.67	75.68	23.9	.67	2.08	15.52	.59	.62	8.39	2.32	1.84	2.92	2.03	.83	March	1.21	1	1	0	1	-.1	1.3	20.67	Unclassified [in work,occ unknown]	97.4	4.15	1
790	32	45.82	46.87	92.68	33.95	80.82	27.7	1.45	5.09	17.06	1.3	1.47	10.64	1.87	1.85	3.74	2.98	1.41	March	1.71	2	1	0	4	-.32	.05	13.56	Intermediate occupations	67.4	3.04	0
791	32	27.61	39.03	66.64	37.53	76.56	24.46	.78	2.49	15.75	.7	.73	8.7	1.54	1.45	2.42	1.57	1.05	March	.81	5	1	1	3	-.06	.05	14.87	Intermediate occupations	37.8	1.6	1
792	32	22.46	36.59	59.04	38.96	75.54	23.79	.64	2	15.46	.58	.59	8.33	2.42	2.33	4.39	3.36	1.92	March	.11	1	1	0	3	-.82	.2	20.67	Intermediate occupations	26.8	.81	1
793	32	24.24	38.3	62.54	37.88	76.18	24.11	.67	2.05	15.7	.6	.61	8.41	1.77	1.53	3.42	1.75	.81	March	-3.39	3	1	1	4	-.21	.05	13.03	Managerial & professional occupations	37.8	.54	0
794	32	28.74	39.34	68.08	37.3	76.64	24.37	.76	2.41	15.73	.68	.71	8.64	1.96	1.93	3.94	3.09	1.73	March	-4.09	2	1	1	2	-.21	.05	13.75	Inactive	53.2	.82	0
795	32	31.1	42.02	73.13	36.75	78.78	24.98	.84	2.96	15.92	.75	.85	9.07	2.14	1.74	3.37	1.82	.73	March	-1.29	1	1	0	4	-.82	.7	41	Unclassified [in work,occ unknown]	24.8	1.32	1
796	32	23.75	37.07	60.82	38.64	75.72	23.88	.66	2.07	15.49	.59	.61	8.39	2.26	1.88	3.52	1.96	.92	March	.21	3	1	0	4	-.82	.4	20.67	Intermediate occupations	29.6	1.23	0
797	32	21.64	36.13	57.77	39.26	75.39	23.64	.61	1.9	15.38	.55	.56	8.26	1.66	1.52	3.49	2.39	1.02	March	-5.29	5	1	1	4	-.53	.8	13.56	Managerial & professional occupations	21.8	1.3	1
798	32	24.32	37.41	61.73	38.51	75.92	24	.69	2.17	15.54	.62	.64	8.47	1.94	1.83	3.81	2.73	1.2	March	-3.79	1	1	1	2	-.28	2.9	13.56	Routine & manual occupations	68.4	3.03	0
799	32	26.04	38.22	64.26	38.07	76.29	24.26	.75	2.37	15.65	.66	.7	8.61	1.6	1.56	4	3.11	1.44	March	-4.09	2	1	0	4	-.82	2.5	17.09	Routine & manual occupations	15.8	1.3	1
800	32	26.15	38.5	64.65	37.82	76.31	24.02	.67	2.15	15.57	.6	.63	8.46	2.34	1.83	3.62	1.6	.86	March	4.81	4	1	1	2	-.82	.6	41	Unclassified [in work,occ unknown]	44	2.8	0
801	32	27.49	38.78	66.27	37.59	76.37	24.35	.76	2.4	15.71	.68	.71	8.63	1.78	1.75	3.17	2.86	1.46	March	-2.29	3	1	1	3	-.82	.05	20.67	Intermediate occupations	26	.99	0
802	32	21.83	36.26	58.09	39.23	75.49	23.7	.63	1.95	15.4	.56	.58	8.3	1.84	1.74	3.42	2.83	1.46	March	-2.19	2	1	0	2	-.13	.05	13.56	Unclassified [in work,occ unknown]	42.6	1.52	0
803	32	35.17	41.58	76.75	35.96	77.55	25.06	.9	2.94	16.01	.8	.86	9.05	2.07	1.74	3.3	2.09	.82	March	2.41	5	1	1	4	-.82	.05	38.21	Unclassified [in work,occ unknown]	58.4	2.27	0
804	32	28.69	39.15	67.85	37.38	76.53	24.36	.76	2.41	15.71	.68	.71	8.65	1.5	1.41	3.88	2.36	1.04	March	-2.79	2	1	0	1	-.1	.3	38.21	Unclassified [in work,occ unknown]	23	1.36	0
805	32	22.72	36.67	59.39	39	75.67	23.81	.65	2.03	15.45	.58	.6	8.36	1.96	1.62	3.42	1.85	.68	March	-.59	2	1	1	2	-.82	1.7	13.56	Intermediate occupations	69.6	2.97	0
806	32	26.83	38.46	65.29	37.82	76.28	24.24	.74	2.34	15.66	.66	.69	8.59	2.25	1.93	3.87	2.49	1.1	March	2.91	3	1	0	3	-.13	.3	17.09	Managerial & professional occupations	49.8	1.74
807	32	36.66	42.03	78.7	35.64	77.67	25.17	.93	3.04	16.06	.82	.88	9.12	2.13	1.93	3.95	3.03	1.41	March	9.11	2	1	1	4	-.97	3.7	38.21	Routine & manual occupations	119.6	3.25	0
808	33	21.01	35.36	56.37	39.72	75.08	23.46	.58	1.77	15.29	.51	.52	8.16	1.86	1.64	3.03	2.17	1.08	March	-1.69	2	4	1	1	.05	.2	22.42	Inactive	54	2.21	0
809	33	21.81	35.96	57.78	39.45	75.41	23.7	.63	1.95	15.4	.56	.57	8.3	1.98	1.81	3.55	2.48	1.13	March	.81	3	4	0	3	.44	.05	13.25	Intermediate occupations	64.4	2.78	0
810	33	29.6	39.8	69.4	37.51	77.31	25.13	.9	3.1	15.99	.8	.92	9.14	2.39	1.77	2.69	1.5	.73	March	.71	1	4	1	2	.3	.2	13.25	Intermediate occupations	42	1.39	0
811	33	21.86	35.6	57.46	39.71	75.31	23.57	.61	1.91	15.31	.54	.56	8.27	2.09	1.81	3.54	2.26	.91	March	4.81	3	4	1	4	-.28	.3	45.02	Intermediate occupations	58.4	2.28	0
812	33	21.21	35.39	56.61	39.68	75.07	23.45	.57	1.76	15.29	.51	.52	8.16	2.14	1.89	3.05	2.37	1.54	March	2.61	3	4	1	4	.34	.05	22.42	Unclassified [in work,occ unknown]	70.8	3.33	0
813	33	24.38	37.1	61.47	38.82	75.91	23.81	.63	1.98	15.49	.56	.6	8.32	1.9	1.84	3.01	3.43	.94	March	4.31	1	4	1	4	-.24	.2	23.46	Managerial & professional occupations	34.4	1.47	0
814	33	25.56	37.34	62.9	38.63	75.97	24.04	.71	2.23	15.53	.64	.65	8.51	2.77	2.3	4.19	2.58	1.11	March	3.71	1	4	0	4	.48	.05	22.42	Intermediate occupations	88	3.69	1
815	33	26.97	38.33	65.3	38.18	76.51	24.67	.82	2.72	15.79	.73	.78	8.88	2.92	2.49	4.79	2.75	1.18	March	7.41	1	4	0	3	-.06	.05	13.25	Intermediate occupations	51.8	2.09	0
816	33	21.12	35.17	56.29	40.17	75.34	23.5	.62	1.9	15.25	.55	.55	8.25	1.7	1.42	2.37	1.37	.83	March	-.89	5	4	1	2	.41	.6	38.26	Routine & manual occupations	29.8	1.17	1
817	33	24.94	36.47	61.41	38.95	75.43	23.68	.61	1.96	15.39	.54	.59	8.29	2.1	1.91	4.06	2.52	1.47	March	-5.29	1	4	0	2	-.35	.05	17.33	Managerial & professional occupations	24.2	1.61	1
818	33	23.89	36.58	60.47	39.04	75.62	23.8	.66	2.05	15.43	.59	.6	8.38	2.27	2.06	4.24	2.65	1.25	March	2.01	5	4	0	4	.19	1.5	22.42	Managerial & professional occupations	18	1.09	0
819	33	21.07	35.38	56.45	39.71	75.08	23.45	.58	1.77	15.29	.51	.52	8.16	2.42	2.17	4.03	3.47	1.35	March	2.01	1	4	1	3	.12	.05	22.42	Routine & manual occupations	52.8	2.06	0
820	33	25.07	37.61	62.68	38.36	75.98	23.98	.67	2.1	15.57	.6	.62	8.41	2.13	2.06	3.82	3.18	1.73	March	4.41	3	4	0	3	.3	.05	21.76	Routine & manual occupations	65.4	2.68	0
821	33	21.49	35.41	56.9	39.69	75.1	23.49	.58	1.82	15.3	.52	.54	8.19	2.17	1.98	3.45	2.7	1.34	March	-1.89	4	4	0	2	.23	.5	17.33	Routine & manual occupations	20	.98	0
822	33	22.82	36.45	59.27	39.21	75.66	23.88	.67	2.08	15.48	.6	.61	8.4	2.07	1.91	4.54	2.72	1.2	March	-2.29	5	4	1	4	.34	.05	28.71	Routine & manual occupations	21.2	1.18	1
823	33	21.51	35.79	57.3	39.53	75.32	23.64	.61	1.9	15.37	.55	.56	8.26	1.51	1.46	3.34	2.59	1.26	March	-.99	3	4	1	2	-.24	1.3	13.25	Intermediate occupations	78.4	4.03	0
824	33	24.88	37.45	62.33	38.67	76.12	24.25	.77	2.35	15.64	.68	.68	8.6	2.45	2.14	3.79	2.48	1.25	March	1.01	1	4	0	1	.52	2	13.25	Intermediate occupations	28.8	1.21	0
825	33	26.65	38.24	64.9	38.24	76.48	24.6	.81	2.65	15.77	.73	.76	8.83	2.09	1.87	2.72	2.07	1.57	March	.31	1	4	1	3	.44	.05	13.25	Managerial & professional occupations	22.8	1.08	0
826	33	24.12	37.2	61.32	38.48	75.68	23.72	.62	1.91	15.43	.55	.56	8.29	2.41	2.08	3.52	2.77	1.14	March	-1.19	1	4	1	4	.34	.05	16.49	Managerial & professional occupations	17.2	.88	0
827	33	22.39	36.3	58.69	39.33	75.63	23.86	.66	2.07	15.46	.59	.6	8.39	2.15	1.73	3.41	1.83	.71	March	4.01	5	4	1	3	-.28	1.6	28.71	Unclassified [in work,occ unknown]	21.4	.78	0
828	33	26.38	38.39	64.77	38.19	76.57	24.48	.79	2.55	15.73	.71	.75	8.75	2.28	1.97	2.92	2.44	1.39	March	-.99	2	4	0	3	.34	.05	14.97	Managerial & professional occupations	20	1.69	1
829	33	21.31	35.64	56.95	39.63	75.28	23.6	.61	1.88	15.35	.54	.55	8.25	2.46	2.26	4.49	2.91	1.47	March	4.91	1	4	1	4	.12	.05	22.42	Intermediate occupations	79.8	2.75	0
830	33	21.17	35.47	56.64	39.7	75.17	23.51	.59	1.82	15.31	.53	.54	8.2	2.93	2.74	5.49	3.64	1.87	March	6.91	3	4	1	4	.48	.05	22.42	Intermediate occupations	43.4	2.2	0
831	34	46.08	46.45	92.53	33.35	79.8	25.01	.69	2.14	16.46	.61	.64	8.54	1.86	1.76	3.31	2.64	1.48	March	-.79	2	1	1	4	-.53	.1	36.63	Managerial & professional occupations	70	3.42	0
832	34	36.17	42.8	78.97	35.17	77.98	24.51	.65	2	16.09	.58	.6	8.42	1.81	1.38	2.74	1.29	.54	March	-.49	4	1	1	2	-.39	.7	12.12	Unclassified [in work,occ unknown]	42.2	1.72	0
833	34	30.41	41.65	72.06	36.4	78.04	24.65	.74	2.36	15.99	.66	.7	8.66	1.81	1.47	3.33	1.57	.61	March	-1.09	4	1	1	2	-.68	.05	45.5	Managerial & professional occupations	60	3.36	0
834	34	51.28	48.63	99.91	32.21	80.84	25.34	.65	1.99	16.83	.58	.59	8.5	1.72	1.55	3.08	2.2	1.05	March	-3.19	1	1	0	2	-.53	.05	31.65	Managerial & professional occupations	15.4	.83	0
835	34	34.1	43.36	77.46	35.42	78.78	24.99	.82	2.51	16.22	.73	.75	8.77	2.4	2.07	3.25	2.76	1.2	March	.51	1	1	1	2	-.5	.05	23.5	Intermediate occupations	18.2	.37	0
836	34	28.46	39.9	68.36	36.76	76.67	24.32	.71	2.22	15.8	.63	.67	8.52	2.08	2.05	4	3.66	1.7	March	3.91	1	1	1	4	-.35	.05	10.54	Routine & manual occupations	49.6	1.67	0
837	34	26.14	39.14	65.28	37.79	76.93	24.14	.72	2.12	15.68	.64	.63	8.46	1	.93	2.58	1.54	.74	March	-6.09	2	1	0	1	-.46	1.6	26.61	Routine & manual occupations	19	1.17
838	34	29.71	40.65	70.36	36.59	77.24	24.35	.66	2.05	15.92	.59	.61	8.43	2.79	2.41	4.38	3.54	1.32	March	3.91	5	1	0	4	-.93	.05	45.5	Routine & manual occupations	29	1.53	0
839	34	36.65	43.98	80.62	34.8	78.77	25.04	.78	2.54	16.25	.7	.75	8.79	2	1.72	3.55	2.24	.92	March	1.71	1	1	0	3	-.42	6	23.5	Routine & manual occupations	49	2.33	1
840	34	41.77	47.63	89.4	33.57	81.2	25.68	.91	2.92	16.59	.81	.86	9.09	2.55	2.06	3.53	2.09	.94	March	9.71	2	1	1	2	-.5	.1	19.69	Inactive	44.6	2.01	0
841	34	28.43	40.44	68.87	36.73	77.17	24.5	.73	2.25	15.94	.65	.67	8.56	1.8	1.62	3.61	2.5	1.06	March	-1.09	4	1	0	4	-.46	.05	15.01	Inactive	23.6	1.47	0
842	34	28.69	40.35	69.04	36.84	77.18	24.35	.68	2.11	15.88	.6	.63	8.47	1.68	1.48	2.99	2.19	.85	March	-2.19	2	1	0	1	-1.22	.05	45.5	Unclassified [in work,occ unknown]	33.6	1.24	0
843	34	29.1	40.44	69.54	36.74	77.18	24.34	.67	2.07	15.89	.6	.62	8.45	1.95	1.63	3.42	1.87	.75	March	-.49	3	1	0	4	-.82	.05	45.5	Inactive	29.8	1.54	0
844	34	31.55	41.48	73.03	36.12	77.59	24.48	.68	2.08	16.02	.6	.62	8.47	2.23	1.93	2.73	2.11	1.37	March	-2.49	1	1	0	2	-.32	.8	45.5	Routine & manual occupations	29	1.52	0
845	34	36.31	44.8	81.1	34.98	79.78	25.27	.92	2.75	16.33	.82	.83	8.94	2.23	1.93	2.73	2.11	1.37	March	-.09	1	1	0	1	-.28	2.4	45.5	Inactive	23	1.71	1
846	34	31.55	41.48	73.03	36.12	77.59	24.48	.68	2.08	16.02	.6	.62	8.47	1.86	1.83	4.17	2.87	1.57	March	3.71	2	1	1	1	-.6	.05	45.5	Routine & manual occupations	38.2	1.1
847	34	29.32	40.37	69.69	36.25	76.62	24.39	.75	2.27	15.83	.67	.69	8.55	2.77	2.37	3.81	2.82	1.37	March	3.51	1	1	1	3	-.46	19.2	19.86	Intermediate occupations	53.8	2.43	0
848	34	36.17	42.8	78.97	35.17	77.98	24.51	.65	2	16.09	.58	.6	8.42	2.1	1.65	3.45	1.6	.45	March	1.91	4	1	0	2	-.53	1.1	12.12	Routine & manual occupations	24.2	1.02	0
849	35	34	41.85	75.85	35.67	77.52	24.31	.63	1.94	15.93	.57	.58	8.37	1.41	1.37	2.3	2.59	1.27	March	-3.79	5	2	1	2	-1.69	.2	39.61	Routine & manual occupations	40	2.07	0
850	35	21.97	35.67	57.64	39.66	75.32	23.55	.61	1.91	15.29	.55	.56	8.26	1.99	1.91	3.63	2.9	1.2	March	.91	2	2	0	3	-1.65	.05	33.79	Managerial & professional occupations	45.8	2	0
851	35	25.25	37.88	63.13	38.02	75.9	23.84	.64	1.99	15.49	.57	.59	8.35	2.02	1.83	2	2.22	1.74	March	-4.09	1	2	1	2	-1.83	.05	31.69	Managerial & professional occupations	25.6	1.8	0
852	35	21.53	35.63	57.16	39.7	75.33	23.53	.6	1.89	15.28	.54	.55	8.25	2.02	1.8	3.23	2.39	1.34	March	-1.49	2	2	1	1	-1.47	.05	46.41	Routine & manual occupations	23	1.36	1
853	35	24.07	36.73	60.8	38.89	75.61	23.8	.65	2.02	15.43	.58	.59	8.36	2.18	1.69	1.75	1.76	.93	March	-5.69	3	2	0	4	-1.58	1	26.84	Intermediate occupations	20.2	1.92	0
854	35	33.47	41.62	75.09	36.64	78.26	25.78	1.1	3.54	16.27	.98	1.01	9.51	2.84	2.17	2.39	2.22	1.51	March	6.91	1	2	1	4	-1.44	4.3	13.25	Intermediate occupations	34	1.04	1
855	35	28.46	39.28	67.73	37.61	76.89	24.68	.84	2.68	15.83	.75	.78	8.85	1.77	1.64	2.53	1.67	1.54	March	4.81	2	2	1	4	-1.51	.2	38.21	Managerial & professional occupations	34.4	1.3	1
856	35	22.24	35.64	57.89	39.59	75.23	23.55	.59	1.87	15.32	.53	.56	8.23	1.99	1.85	3.1	2.19	1.42	March	-1.09	3	2	0	2	-1.47	.05	14.12	Intermediate occupations	36.4	1.75	0
857	35	22.81	36.16	58.97	39.14	75.31	23.57	.6	1.84	15.34	.53	.54	8.23	1.8	1.66	3.17	2.17	1.15	March	.01	1	2	1	4	-1.44		26.84	Intermediate occupations	23.8	1.28	1
858	36	20.89	35.49	56.37	40.14	75.62	23.94	.72	2.17	15.48	.64	.64	8.46	2.24	2.17	4.5	3.58	2.2	November	-.09	2	3	1	3	.44	.05	11.48	Managerial & professional occupations	53.4	2.18	0
859	36	24.51	36.73	61.24	38.98	75.71	23.99	.72	2.15	15.52	.65	.62	8.46	2.13	1.92	4.32	2.54	1.26	November	1.71	3	3	1	2	.44	.05	10.84	Managerial & professional occupations	56	2	0
860	36	21.34	35.91	57.25	39.81	75.73	24.07	.73	2.25	15.54	.66	.66	8.53	1.52	1.48	2.67	2.26	1.2	November	-3.99	3	3	1	2	.05	1.1	14.67	Managerial & professional occupations	21	.95	0
861	36	20.3	35.37	55.67	40.11	75.48	23.87	.7	2.09	15.45	.62	.61	8.42	1.53	1.43	2.16	1.57	1.22	November	-2.59	3	3	1	3	.55	.05	10.84	Managerial & professional occupations	21.6	1.07	1
862	36	23.79	37.08	60.87	39.34	76.42	24.49	.82	2.62	15.71	.73	.78	8.78	2.39	2.21	4.88	3.49	1.41	November	-.39	3	3	0	3	.26	.05	16.93	Managerial & professional occupations	73.8	1.13	1
863	36	26.01	37.34	63.34	38.59	75.93	24.13	.76	2.25	15.59	.68	.64	8.54	1.52	1.26	2.19	1.48	.65	November	-1.59	3	3	1	1	-.1	.05	9.85	Intermediate occupations	42	1.44	0
864	36	26.4	38.24	64.64	38.44	76.68	24.36	.76	2.32	15.77	.68	.67	8.6	1.84	1.5	2.33	1.48	.76	November	2.21	5	3	0	1	.44	.2	42.47	Routine & manual occupations	92.4	3.23
865	36	26.44	38.18	64.62	38.61	76.79	25.07	.92	3.06	15.99	.82	.93	9.09	1.78	1.47	3.08	1.54	.68	November	-1.29	3	3	0	2	-.24	.05	14.67	Managerial & professional occupations	49.8	2.14	0
866	36	28.55	39.2	67.74	38.03	77.23	25.23	.99	3.13	16.07	.88	.94	9.16	1.85	1.63	2.93	2.16	.93	November	1.91	3	3	1	1	.26	.05	13.63	Managerial & professional occupations	84.6	1.4	0
867	36	22.37	36.39	58.77	39.6	75.99	24.29	.78	2.43	15.64	.7	.72	8.65	2.25	1.75	2.95	1.76	.7	November	1.21	3	3	0	3	.52	.05	18.43	Routine & manual occupations	58.6	2.83	0
868	36	19.95	35.16	55.11	40.23	75.39	23.79	.68	2.04	15.42	.61	.59	8.37	2.26	1.93	3.14	2.24	.92	November	-.19	3	3	0	2	.15	.05	10.84	Intermediate occupations	82.2	3.4	0
869	36	20.07	34.34	54.41	40.68	75.02	23.53	.62	1.88	15.28	.56	.55	8.25	2.25	1.69	3.07	1.54	.54	November	-3.89	3	3	0	3	-.57	.05	33.83	Intermediate occupations	42.8	1.82	1
870	36	21.33	35.92	57.25	39.81	75.72	24.05	.73	2.23	15.54	.65	.65	8.51	2.85	2.7	5.47	4.31	1.88	November	6.21	3	3	0	2	.15	.05	14.67	Managerial & professional occupations	66.4	1.81	0
871	36	24.39	36.87	61.26	38.99	75.86	24.12	.75	2.24	15.58	.67	.64	8.54	1.96	1.96	3.66	3.25	2	November	-1.69	1	3	0	1	.19	.4	9.85	Managerial & professional occupations	40.6	1.85	1
872	36	33.54	40.37	73.91	36.73	77.11	24.84	.91	2.65	15.96	.81	.75	8.88	1.13	1.01	1.24	1.13	.74	November	-3.29	3	3	1	2	.19	.05	17.67	Unclassified [in work,occ unknown]	56.2	2.9	0
873	36	25.77	37.92	63.69	38.75	76.67	24.95	.91	2.96	15.93	.81	.9	9.02	1.84	1.41	2.49	.98	.54	November	1.21	3	3	0	1	-.82	.05	14.67	Managerial & professional occupations	30.8	.94	0
874	36	19.9	35.17	55.06	40.27	75.43	23.82	.69	2.07	15.42	.61	.6	8.39	2.08	1.9	3.65	3.16	1.28	November	-3.49	3	3	0	1	-.39	.05	16.93	Routine & manual occupations	23.8	1.09	0
875	36	21.22	35.76	56.98	39.83	75.58	23.93	.71	2.12	15.49	.63	.62	8.44	1.58	1.43	3.34	2.21	.91	November	-5.49	3	3	1	3	.41	2.2	13.63	Managerial & professional occupations	84	4.41	0
876	36	21.66	35.99	57.66	39.71	75.7	24.01	.73	2.18	15.53	.65	.63	8.48	1.47	1.29	2.19	1.89	.82	November	-2.69	5	3	1	1	.12	.5	13.63	Managerial & professional occupations	47.2	2.42	0
877	36	21.55	35.61	57.15	39.68	75.28	23.77	.65	1.93	15.45	.58	.56	8.33	1.92	1.66	3.04	1.96	.94	November	.81	1	3	1	3	-.42	5.3	21.93	Inactive	33.4	1.09	0
878	36	21.46	35.95	57.4	39.77	75.71	24.02	.73	2.2	15.53	.65	.64	8.49	1.09	1.07	2.22	1.73	1.42	November	2.51	3	3	0	1	-.17	.05	14.67	Managerial & professional occupations	74.8	3.53	1
879	36	20.18	35.3	55.48	40.18	75.48	23.86	.69	2.1	15.44	.62	.61	8.42	1.74	1.62	3.96	2.18	1.08	November	-.59	3	3	1	3	.41	.05	10.84	Managerial & professional occupations	47.2	.47	0
880	37	18.85	34.37	53.22	40.78	75.15	23.62	.65	1.94	15.32	.58	.56	8.3	1.7	1.68	3.59	2.37	1.39	November	-3.29	1	2	0	2	-.32	.05	11.48	Managerial & professional occupations	30.2	1.12	1
881	37	21.05	35.33	56.38	40.14	75.46	23.87	.68	2.1	15.46	.61	.62	8.41	1.64	1.47	2.62	1.53	1.07	November	-2.99	3	2	0	1	-.17	.05	9.89	Intermediate occupations	68.6	2.73	0
882	37	22.6	36.66	59.27	39.5	76.17	24.21	.73	2.25	15.67	.66	.67	8.54	1.56	1.56	3.23	2.12	1.49	November	-2.99	3	2	1	3	.01	.05	32.27	Intermediate occupations	41.8	1.22	0
883	37	21.94	34.95	56.9	40.22	75.17	23.66	.64	1.97	15.35	.57	.58	8.31	2.46	2.22	4.75	2.83	1.32	November	3.71	1	2	0	2	.12	.05	12.52	Intermediate occupations	37.2	1.47	1
884	37	20.08	34.39	54.47	40.61	75	23.48	.63	1.85	15.26	.56	.53	8.22	1.92	1.52	1.91	1.36	.78	November	-1.89	1	2	0	2	-.1	1	12.33	Intermediate occupations	38.6	1.49	1
885	37	21.45	34.23	55.68	41.13	75.35	23.66	.62	2.07	15.31	.55	.62	8.35	1.98	1.62	2.53	2.01	1	November	-2.99	3	2	0	1	-.24	.3	19.11	Managerial & professional occupations	46.8	2.31	0
886	37	23.29	36.56	59.86	39.35	75.91	24.03	.71	2.17	15.55	.63	.64	8.48	1.76	1.75	4.13	3.6	1.78	November	-4.79	2	2	0	1	-.17	.05	13.99	Managerial & professional occupations	16.4	1.03	1
887	37	20.16	34.54	54.69	40.53	75.06	23.55	.63	1.89	15.3	.56	.55	8.25	2.61	1.05	1.12	.58	.65	November	1.71	1	2	0	3	-.1	.05	8.55	Managerial & professional occupations	32.6	1.54	1
888	37	23.06	36.84	59.9	38.9	75.74	24.08	.7	2.06	15.66	.62	.6	8.42	2.11	1.74	4.52	2.39	.95	November	-.19	2	2	1	2	-.28	.4	41.13	Routine & manual occupations	38.2	1.68	0
889	37	21.12	35.68	56.8	40.06	75.74	24.01	.73	2.23	15.51	.65	.66	8.51	1.56	1.55	2.53	2.59	1.32	November	-3.49	4	2	1	1	-.06	.05	11.48	Routine & manual occupations	25	1.24	0
890	37	24.19	36.38	60.57	39.73	76.11	24.47	.79	2.67	15.66	.71	.79	8.8	1.85	1.74	3.2	2.81	1.88	November	.01	3	2	1	3	-.28	.3	12.33	Intermediate occupations	56	2.15	0
891	37	20.55	34.6	55.15	40.45	75.06	23.58	.62	1.87	15.33	.55	.55	8.25	.71	.69	1.33	1.05	.51	November	3.61	3	2	1	2	.08	.05	12.52	Routine & manual occupations	87.2	2.74	0
892	37	22.51	36.64	59.15	39.51	76.15	24.27	.78	2.4	15.63	.7	.7	8.64	1.48	1.35	2.91	1.71	.84	November	-3.19	3	2	1	3	-.06	.05	16.63	Routine & manual occupations	29.4	1.15	0
893	37	23.92	36.38	60.29	39.37	75.75	24.05	.73	2.22	15.55	.65	.65	8.49	2.9	1.45	1.61	.31	3.61	November	2.81	3	2	1	2	-.1	.05	11.81	Managerial & professional occupations	81.4	3.27	0
894	37	19.99	34.36	54.34	40.66	75.02	23.52	.62	1.87	15.28	.55	.55	8.24	2.17	1.98	4.13	3.54	1.75	November	4.51	3	2	1	1	.05	.05	8.55	Managerial & professional occupations	33.2	.71	0
895	37	22.67	35.64	58.3	39.89	75.53	24	.71	2.23	15.51	.63	.67	8.5	1.92	1.66	2.21	1.66	1.37	November	.81	1	2	0	1	-.28	.05	12.52	Managerial & professional occupations	22.6	1.22	1
896	37	22.89	36.71	59.6	39.03	75.75	24.03	.71	2.11	15.59	.63	.62	8.44	2.51	1.73	1.89	1.44	1.28	November	2.01	1	2	0	3	-.24	.05	9.82	Managerial & professional occupations	25.4	1.13	1
897	37	20.27	35.13	55.4	40.32	75.45	23.83	.69	2.1	15.42	.62	.61	8.41	1.28	1.13	2.9	2.17	.93	November	-6.59	3	2	1	3	-.17	.05	11.48	Intermediate occupations	77.8	4.63	0
898	37	31.04	40.17	71.21	37.63	77.8	25.43	1.02	3.24	16.2	.91	.96	9.23	2.14	1.85	3.78	2.49	1.04	November	-.39	5	2	1	3	-.17	.05	9.99	Managerial & professional occupations	49	2.3	0
899	37	25.86	36.88	62.74	39.31	76.19	24.63	.82	2.77	15.77	.73	.85	8.87	1.81	1.45	3.07	1.67	.5	November	-2.99	3	2	0	1	.01	.05	12.52	Intermediate occupations	65.2	3.01
900	37	20.81	34.9	55.71	40.26	75.16	23.63	.65	1.93	15.34	.58	.56	8.29	2.28	1.88	2.83	1.98	1.08	November	.71	3	2	0	3	-.28	.05	11.81	Intermediate occupations	67.4	2.7	0
901	37	25.81	37.94	63.76	38.08	76.03	24.33	.74	2.21	15.78	.66	.64	8.56	1.32	1.28	3.75	2.08	.91	November	1.81	3	2	1	3	-.13	.05	27.47	Managerial & professional occupations	76.4	2.98	0
902	38	21.35	35.28	56.64	40.08	75.36	23.74	.64	1.97	15.41	.57	.57	8.33	2.48	1.67	2.21	.9	.5	November	-2.89	3	1	0	2	.55	.05	17.91	Inactive	48.6		0
903	38	17.14	33.05	50.2	41.62	74.67	23.41	.57	1.73	15.27	.51	.51	8.14	1.46	1.28	1.77	1.94	.76	November	-7.79	3	1	0	2	.55	.05	21.09	Managerial & professional occupations	55.4		0
904	38	21.07	35.37	56.44	40.08	75.45	23.8	.65	1.98	15.46	.58	.58	8.34	2.82	1.84	2.74	1.46	1.72	November	4.81	5	1	1	3	.55	6.9	32.43	Inactive	77.6		1
905	38	22.7	35.92	58.62	39.45	75.37	23.78	.65	1.94	15.47	.58	.57	8.31	2.03	1.41	2.15	1.02	.18	November	-7.29	3	1	0	3	.55	.05	16.22	Routine & manual occupations	19.2	.95	0
906	38	24.94	37.35	62.29	38.78	76.12	24.18	.73	2.2	15.67	.65	.64	8.51	2.7	2.11	3.16	2.09	1.04	November	5.31	1	1	1	3	.34	1.2	27.12	Inactive	41.2	1.94	1
907	38	19.47	34.48	53.95	40.8	75.29	23.73	.64	1.96	15.42	.57	.58	8.32	1.9	1.61	2.67	1.75	1.05	November	-7.49	5	1	1	1	.55	.05	24.16	Routine & manual occupations	18.6		1
908	38	30.9	40.32	71.22	37.9	78.22	25.2	.93	3.12	16.04	.83	.93	9.16	2.47	2.06	3.74	2.66	1.08	November	3.51	2	1	0	3	.52	.1	20.11	Inactive	51.4	2.83	0
909	38	22.39	36.1	58.49	39.48	75.58	23.9	.67	2	15.53	.6	.58	8.36	2.23	1.83	3.78	2.14	.8	November	.61	1	1	0	3	.44	.05	18.46	Managerial & professional occupations	26.2	1.6	1
910	38	25.07	37.4	62.47	38.84	76.24	24.2	.73	2.18	15.7	.65	.64	8.5	1.55	1.19	1.83	1.03	.54	November	-4.79	3	1	1	2	.59	41.1	42.47	Inactive	40.2		0
911	38	23.29	36.28	59.57	39.27	75.55	23.89	.67	1.99	15.54	.59	.58	8.35	2.07	1.68	2.22	2.48	.77	November	-2.19	4	1	0	2	.52	.05	23.21	Managerial & professional occupations	43	2.29	0
912	38	23.89	36.39	60.28	39.26	75.65	23.92	.67	2.05	15.52	.6	.6	8.39	2.2	1.57	2.3	1.38	.61	November	.21	3	1	0	2	.3	.05	23.21	Intermediate occupations	59.4	2.97	1
913	38	25.54	37.74	63.28	38.39	76.13	24.26	.73	2.22	15.71	.65	.64	8.55	1.73	1.39	3.37	1.49	.43	November	-8.99	5	1	0	1	.55	.4	20.03	Managerial & professional occupations	31.2		1
914	38	26.25	37.74	63.99	38.45	76.19	24.21	.73	2.2	15.7	.65	.64	8.51	1.92	1.91	3.75	2.74	1.5	November	2.21	3	1	1	1	.48	.05	27.12	Routine & manual occupations	56.4	1.96	1
915	38	23.46	36.84	60.3	39.39	76.24	24.23	.73	2.31	15.65	.65	.68	8.58	.82	.44	.75	.67	.43	November	-2.59	3	1	1	1	.55	.3	32.43	Routine & manual occupations	35.6	2.02	0
916	38	21.35	35.28	56.64	40.08	75.36	23.74	.64	1.97	15.41	.57	.57	8.33	2.1	1.69	2.89	1.89	.67	November	-4.49	3	1	0	2	.62	.05	17.91	Inactive	44	1.51	0
917	38	23.83	36.08	59.91	39.34	75.42	23.77	.65	1.97	15.45	.58	.58	8.33	2.05	1.74	3.45	2.52	.97	November	1.51	3	1	1	2	.41	.05	20.11	Intermediate occupations	76	2.96	0
918	38	23.67	36.46	60.12	39.15	75.61	23.9	.67	2	15.54	.6	.58	8.36	2.21	1.86	2.66	2.08	1.12	November	-1.79	1	1	0	3	.55	.1	18.46	Managerial & professional occupations	54.6		1
919	38	19.91	34.23	54.14	40.81	75.04	23.61	.62	1.91	15.34	.55	.56	8.27	2.32	1.97	3.62	2.68	.99	November	-1.39	3	1	0	3	.52	.05	15.33	Managerial & professional occupations	47.2	2.5	0
920	38	27.49	39.03	66.51	38.44	77.47	24.88	.98	2.78	15.97	.87	.83	8.91	2.95	2.46	4.3	2.63	1.37	November	5.61	1	1	0	3	.59	1.1	16.63	Routine & manual occupations	28		1
921	39	32.37	39.45	71.81	37.02	76.47	24.4	.8	2.35	15.77	.71	.67	8.63	1.4	1.35	3.19	1.83	1.09	November	-3.49	3	3	0	3	.01	.1	17.67	Unclassified [in work,occ unknown]	19.8	.76	1
922	39	28.23	39.23	67.45	38.07	77.3	25.02	.98	2.93	15.97	.87	.85	9.05	2.55	2.3	3.48	3.03	1.54	November	7.21	3	3	1	3	-.17	.05	15.9	Unclassified [in work,occ unknown]	31	.82	0
923	39	23.48	37.05	60.53	39.23	76.28	24.35	.81	2.44	15.67	.72	.71	8.68	1.73	1.55	3.4	1.95	.89	November	-4.49	3	3	1	2	-.03	.05	15.9	Intermediate occupations	38.6	1.41	1
924	39	29.98	40.01	69.99	37.65	77.66	24.98	.87	2.9	15.95	.77	.83	9.03	2.17	1.57	2.2	1.76	.76	November	.91	3	3	1	4	.01	.2	27.12	Routine & manual occupations	99.8	3.65	0
925	39	36.78	42.57	79.36	36.14	78.72	25.88	1.21	3.51	16.33	1.08	.96	9.55	1.99	1.63	2.2	1.75	.96	November	-3.09	1	3	1	1	.05	.2	14.16	Managerial & professional occupations	73.6	5.48	1
926	39	25.26	37.3	62.56	38.7	76	24.13	.72	2.19	15.63	.65	.63	8.5	2.2	1.96	3.66	2.28	1.24	November	3.91	5	3	0	3	-.03	.2	27.12	Intermediate occupations	68.8	3	0
927	39	31.42	40.95	72.37	37.4	78.35	25.9	1.11	3.69	16.34	.99	1.11	9.56	2.04	1.89	3.92	2.74	1.32	November	-1.29	3	3	0	1	-.1	.05	13.63	Managerial & professional occupations	52	2	0
928	39	23.33	36.33	59.66	39.68	76.01	24.05	.7	2.18	15.58	.63	.65	8.47	2.27	1.84	3.75	1.87	.81	November	-2.49	5	3	0	1	-.03	1.2	21.27	Unclassified [in work,occ unknown]	39	1.66	1
929	39	21.83	35.89	57.71	39.7	75.59	23.89	.69	2.07	15.48	.61	.61	8.4	1.61	1.27	2.09	1.19	.6	November	-4.89	3	3	0	3	.01	.2	15.06	Routine & manual occupations	23.2	1.1	0
930	39	24.37	36.61	60.98	39.01	75.62	23.93	.71	2.11	15.5	.63	.61	8.43	1.78	1.59	1.9	2.58	1.01	November	.81	3	3	0	3	-.28	.1	10.84	Managerial & professional occupations	64.2	2.93	0
931	39	26.21	38.02	64.23	38.55	76.56	24.51	.86	2.53	15.74	.76	.72	8.77	2.5	2.23	3.9	3.08	1.6	November	.91	5	3	0	3	-.39	.5	12.18	Managerial & professional occupations	39.6	.45	0
932	39	25.45	37.47	62.92	38.73	76.2	24.26	.76	2.35	15.65	.68	.68	8.61	1.5	1.32	2.89	1.56	.45	November	-8.69	3	3	0	3	.01	.05	15.06	Managerial & professional occupations	17.6	1.04	0
933	39	26.96	38.64	65.6	38.36	77	24.79	.94	2.75	15.86	.84	.78	8.93	1.75	1.7	3.3	1.97	1.21	November	1.51	5	3	1	3	-.24	.05	15.9	Managerial & professional occupations	25.6	.56	0
934	39	27.8	38.72	66.51	38.08	76.79	24.59	.84	2.5	15.84	.75	.72	8.75	2.01	1.8	3.81	3.11	1.16	November	2.11	3	3	0	4	-.03	1.2	17.67	Intermediate occupations	49.8	2.02	1
935	39	29.38	39.91	69.3	38.16	78.08	25.18	.94	3.11	16.04	.84	.94	9.15	1.71	1.7	3.53	2.61	1.35	November	-2.49	2	3	1	3	.01	.6	20.11	Intermediate occupations	25.2	1.29	0
936	39	30.69	40.06	70.75	37.5	77.56	25.14	1.02	3	16	.91	.83	9.14	2.25	2.13	4.12	2.96	1.83	November	1.51	3	3	1	3	-.1	.05	15.9	Intermediate occupations	48.8	1.42	0
937	39	25.26	37.3	62.56	38.7	76	24.13	.72	2.19	15.63	.65	.63	8.5	1.78	1.47	3.13	2.07	.68	November	-3.39	2	3	1	3	.01	.05	27.12	Intermediate occupations	27.4	.93	0
938	39	33.23	39.93	73.15	36.81	76.74	24.58	.84	2.48	15.85	.75	.7	8.74	1.89	1.85	3.68	3.29	1.59	November	.21	3	3	1	3	-.06	.05	17.67	Managerial & professional occupations	45.2	1.25	0
939	39	38.37	41.89	80.26	35.76	77.65	25.13	.98	2.84	16.11	.87	.79	9.02	1.03	1.03	3.29	3.05	1.74	November	-6.89	3	3	0	1	-.06	.05	17.67	Routine & manual occupations	30.4	1.66	0
940	39	35.22	42.17	77.4	36.47	78.64	25.57	1.2	3.1	16.36	1.07	.89	9.21	1.5	1.27	2.3	1.57	.66	November	-4.89	3	3	1	2	-.06	.05	32.36	Intermediate occupations	23.4	1.09	0
941	39	23.76	36.73	60.48	39.25	75.97	24.08	.73	2.21	15.58	.66	.65	8.5	1.22	1.18	2.52	1.92	.95	November	-5.99	5	3	1	1	.01	.05	13.99	Managerial & professional occupations	60.4	2.46	0
942	40	20.31	35.19	55.5	40.07	75.27	23.76	.64	1.92	15.45	.57	.56	8.31	2.07	1.97	4.37	2.75	1.63	October	.91	2	4	1	1	.41	.05	22.98	Managerial & professional occupations	22	.92	0
943	40	26.42	38.27	64.69	38.18	76.44	24.54	.81	2.42	15.82	.72	.69	8.72	1.89	1.59	1.95	1.6	.55	October	1.61	3	2	1	1	.99	.05	21.62	Inactive		1.82	0
944	40	20.64	35.54	56.18	40.05	75.59	23.91	.67	2.04	15.52	.6	.6	8.39	1.87	1.59	2.97	1.83	.82	October	-3.69	3	4	0	1	.48	.05	22.98	Routine & manual occupations	22.6	1.18	0
945	40	21.54	35.41	56.95	39.8	75.21	23.71	.63	1.9	15.42	.56	.55	8.29	1.88	1.73	3.46	2.14	1.06	October	-2.59	3	4	1	2	.48	.05	22.98	Inactive	40	1.87	0
946	40	20.84	35.6	56.44	39.85	75.45	23.9	.67	2	15.53	.6	.59	8.37	1.59	1.46	2.81	1.64	.7	October	-2.89	3	4	1	2	.44	.5	32.27	Routine & manual occupations	43.4	1.68	1
947	40	20.88	35.59	56.46	39.82	75.41	23.88	.66	1.98	15.52	.59	.58	8.36	2.31	2.14	3.98	2.91	1.64	October	1.01	2	4	0	2	.44	.05	32.27	Unclassified [in work,occ unknown]	15.6	.51
948	40	33.2	41.76	74.96	37.15	78.91	26.25	1.18	3.97	16.49	1.05	1.21	9.76	1.93	1.54	2.26	1.44	1	October	-.39	4	2	1	1	.55	.05	14.67	Intermediate occupations	22.6	.92	1
949	40	22.04	36.36	58.4	39.67	76.04	24.12	.72	2.19	15.62	.64	.65	8.5	1.65	1.3	1.88	1.37	.56	October	-3.39	3	2	1	2	1.06	.05	32.27	Intermediate occupations	35.2	1.83	0
950	40	22.77	37.11	59.87	38.75	75.85	24.31	.72	2.12	15.79	.64	.62	8.51	1.77	1.46	1.92	1.62	.79	October	-4.89	2	2	0	1	1.06	.05	34.63	Routine & manual occupations	32.4	1.9	1
951	40	23.72	36.63	60.35	39.01	75.64	23.97	.68	2.02	15.58	.6	.59	8.39	1.23	1.22	3.44	2.36	1.22	October	-6.69	3	4	1	1	.62	.05	23.49	Intermediate occupations	19.2	1.04	1
952	40	25.21	37.79	62.99	38.79	76.57	24.67	.81	2.59	15.9	.72	.79	8.77	1.91	1.73	2.95	2.22	1.22	October	1.21	5	4	1	3	.23	.2	25.7	Inactive	66.6	1.93	1
953	40	21.05	35.72	56.76	39.79	75.51	23.94	.68	2.02	15.55	.6	.59	8.39	1.7	1.59	2.35	1.93	1.28	October	-3.29	3	4	0	1	.44	.05	25.7	Managerial & professional occupations	23.8	1.09	0
954	40	21.02	35.19	56.21	40.18	75.37	23.78	.65	1.99	15.44	.58	.59	8.34	2.19	1.96	3.67	2.67	1.16	October	.01	2	4	0	3	.52	.1	32.43	missing	21	1.13	0
955	40	23.02	36.73	59.75	39.28	76.01	24.22	.73	2.22	15.69	.65	.66	8.52	2.52	2.52	4.8	3.43	2.28	October	3.41	3	2	1	3	.55	.05	25.7	Routine & manual occupations	67.2	2.23	0
956	40	21.48	35.98	57.45	39.74	75.72	24.04	.7	2.11	15.6	.62	.62	8.44	2.36	2.02	3.39	2.41	1.11	October	.11	3	2	0	2	.95	.05	25.7	Intermediate occupations	95.2	3.61	1
957	40	21.77	35.75	57.52	39.58	75.33	23.82	.65	1.94	15.49	.58	.57	8.33	1.83	1.53	2.87	2.01	.79	October	-.69	1	2	1	1	.91	.05	24.31	Intermediate occupations	42.8	1.42	0
958	40	21.86	35.56	57.42	39.67	75.23	23.74	.64	1.9	15.44	.57	.55	8.3	1.62	1.62	2.68	2.59	1.65	October	1.81	3	2	1	2	.7	.05	19.97	Unclassified [in work,occ unknown]	46.2	1.84	0
959	40	34.07	40.11	74.18	36.63	76.74	24.58	.84	2.46	15.85	.75	.7	8.72	2.19	1.94	2.88	2.21	1.39	October	.71	3	2	0	1	.77	.2	17.67	Inactive	77.8	3.89	0
960	40	24.38	37.02	61.39	38.82	75.84	24.04	.69	2.07	15.62	.62	.6	8.43	1.66	1.52	3.87	2.37	1	October	-2.19	3	4	1	2	.77	.05	23.49	Routine & manual occupations	35	1.87	0
961	40	25.16	37.69	62.86	38.6	76.29	24.22	.73	2.2	15.69	.65	.64	8.53	2.22	1.86	2.61	2.08	1.09	October	-1.49	3	4	0	1	.59	.5	28.82	Unclassified [in work,occ unknown]	23.6	1	0
962	40	24.53	37.24	61.77	38.8	76.05	24.14	.71	2.14	15.66	.64	.63	8.48	2.25	1.85	2.04	1.91	1.27	October	-.19	3	2	1	3	.48	.05	31.71	Inactive	62.4	2.21	0
963	40	20.1	35.16	55.25	40.15	75.31	23.78	.65	1.94	15.46	.58	.57	8.32	1.96	1.81	3.87	2.56	1.18	October	.01	4	4	0	2	-.32	.05	22.98	Routine & manual occupations	29.2	1.6	1
964	40	30.72	40.24	70.96	37.17	77.41	25.24	.98	2.95	16.12	.88	.83	9.12	1.71	1.34	1.96	1.36	.6	October	-5.89	3	2	1	1	.7	.05	30.57	Intermediate occupations	27	1.54	0
965	40	29.3	39.74	69.04	37.61	77.34	24.98	.93	2.74	16.04	.83	.78	8.95	1.85	1.73	3.83	2.2	1.09	October	-6.09	4	2	1	1	.48	.05	30.57	Routine & manual occupations	31	2.04	0
966	40	23.24	36.78	60.02	39.16	75.94	24.11	.71	2.13	15.65	.63	.62	8.47	2.2	2.07	3.58	2.73	1.55	October	2.31	3	2	1	3	.73	.2	31.71	Inactive	40.2	1.49	0
967	40	21.37	35.88	57.24	39.68	75.55	23.95	.68	2.03	15.56	.6	.59	8.39	1.79	1.43	1.5	1.69	.84	October	-3.29	3	2	1	1	.59	.05	25.7	Unclassified [in work,occ unknown]	50.6	1.85	0
968	40	29.37	39.47	68.84	37.57	77.04	24.81	.88	2.61	15.96	.79	.75	8.85	1.92	1.74	2.79	1.91	1.22	October	-2.49	5	2	0	2	1.09	.05	29.87	Managerial & professional occupations	33.2	1.8	1
969	40	24.18	37.01	61.19	38.85	75.86	24.05	.69	2.08	15.61	.62	.61	8.44	1.97	1.28	1.79	1.04	.27	October	-.29	3	2	0	2	1.06	.05	28.82	Intermediate occupations	47.4	1.76	0
970	40	26.01	38	64.01	38.5	76.5	24.44	.77	2.38	15.8	.69	.71	8.64	1.39	1.09	1.67	.87	.39	October	-7.39	3	4	1	1	-.46	.05	31.71	Intermediate occupations	24.4	1.08	0
971	40	22.12	35.87	57.99	39.62	75.49	23.86	.66	1.99	15.51	.59	.58	8.35	2.24	2	3.46	2.61	1.22	October	-3.39	3	2	0	2	.66	.2	23.21	Routine & manual occupations	24.8	1.39	0
972	40	20.41	35.31	55.72	40.02	75.33	23.8	.65	1.95	15.47	.58	.57	8.33	2.43	2.21	3.1	2.43	1.76	October	.11	1	2	0	3	.66	1.9	24.31	Routine & manual occupations	30.2	1.67	0
973	40	25.21	37.79	62.99	38.79	76.57	24.67	.81	2.59	15.9	.72	.79	8.77	1.72	1.63	3.16	2.57	1.27	October	-2.19	5	4	1	3	.41	.3	25.7	Inactive	27	.75	1
974	40	24.42	36.97	61.39	38.84	75.8	24.04	.69	2.06	15.61	.62	.6	8.42	2.18	1.95	2.5	2.6	1.38	October	-2.69	3	2	0	3	.62	.2	23.49	Managerial & professional occupations	33.8	1.7	0
975	40	20.32	35.31	55.63	40.05	75.36	23.82	.66	1.96	15.48	.58	.57	8.34	1.8	1.62	3.34	2.24	1.04	October	.21	3	4	1	1	.73	.05	32.27	Inactive	26.2	1.1	0
976	40	23.16	36.33	59.49	39.17	75.51	23.91	.67	1.99	15.55	.6	.58	8.37	1.67	1.44	1.82	1.5	1.02	October	-1.09	3	4	1	2	.91	.2	23.49	Routine & manual occupations	28.2	1.14	0
977	40	23.91	36.29	60.2	39.05	75.35	23.81	.65	1.93	15.49	.58	.56	8.32	1.97	1.48	1.93	1.41	1	October	-2.89	3	2	0	3	1.02	.4	24.31	Routine & manual occupations	28.6	1.46	0
978	40	22.15	36.1	58.25	39.38	75.48	23.96	.67	2.04	15.56	.6	.59	8.4	1.41	1.33	3.44	1.84	.87	October	-2.29	5	4	0	2	.52	1.1	43.71	Inactive	76	3.94	1
979	40	25.2	37.42	62.62	38.68	76.1	24.2	.72	2.18	15.7	.64	.64	8.5	2.05	1.6	2.15	1.46	1.11	October	1.31	3	2	1	1	.84	7.1	31.71	Routine & manual occupations	48.2	2.11	1
980	40	23.68	36.81	60.48	39.02	75.83	24.04	.69	2.07	15.61	.62	.61	8.43	2.14	1.73	3.04	1.69	.76	October	1.41	2	4	0	2	.52	.3	23.49	Inactive	63.8	2.7	1
981	40	18.47	33.89	52.36	41.12	75.01	23.59	.61	1.86	15.35	.54	.55	8.24	1.9	1.5	2.51	1.75	.61	October	2.31	3	2	1	1	1.13	.05	21.09	Inactive	91.8	4.14	0
982	40	26.77	38.3	65.07	38.12	76.42	24.46	.79	2.36	15.79	.71	.68	8.67	1.78	1.52	3.25	1.84	.78	October	-3.99	3	4	1	1	.26	.1	29.87	Routine & manual occupations	29.8	1.27	1
983	40	22.08	35.64	57.71	39.61	75.24	23.74	.64	1.91	15.44	.57	.56	8.3	1.4	1.32	3.09	1.93	.86	October	-3.79	3	4	1	2	.41		19.97	Routine & manual occupations	29.6	.44	0
984	40	22.5	36.63	59.13	39.59	76.22	24.19	.73	2.25	15.65	.65	.67	8.54	2.16	1.95	4.67	3.02	1.16	October	5.01	4	4	1	3	.95	.05	22.98	Intermediate occupations	66.2	2.25	0
985	40	24.09	37.06	61.15	39.28	76.34	24.15	.7	2.14	15.68	.63	.64	8.47	1.73	1.46	2.64	1.66	.73	October	-1.59	5	4	1	2	.73	.05	30.35	Inactive	71.8	3.61	0
986	40	29.06	39.58	68.63	37.88	77.46	25.36	.94	3.15	16.21	.84	.98	9.15	2.02	1.62	2.07	1.68	1.31	October	.31	2	2	1	1	.59	.2	25.7	Inactive	27.6	1.05	0
987	40	20.53	35.47	55.99	40	75.47	23.87	.67	2	15.51	.6	.59	8.36	1.51	1.44	3.02	2.28	1.24	October	1.41	3	4	1	2	.19	.05	32.27	Routine & manual occupations	63.2	1.95	0
988	41	20.49	34.55	55.04	40.5	75.05	23.58	.61	1.86	15.34	.54	.55	8.24	1.76	1.5	3.7	1.94	.76	October	.71	2	1	1	2	.84	.2	18.22	Managerial & professional occupations	98	4.24	0
989	41	21.47	34.74	56.21	40.38	75.13	23.66	.62	1.93	15.37	.55	.57	8.29	2.73	2.13	3.32	2.16	1	October	4.61	4	1	0	2	.91	.3	18.22	Intermediate occupations	119	5.04
990	41	19.2	34.05	53.24	41.29	75.34	23.79	.62	2	15.46	.55	.6	8.33	2.08	1.94	3.61	2.9	1.65	October	1.51	1	1	1	2	.52	.05	27.95	Intermediate occupations	46.8	1.63	0
991	41	20.54	34.86	55.4	40.55	75.41	23.75	.64	1.98	15.43	.57	.59	8.32	2.08	1.75	3.43	2.23	.68	October	-2.59	4	1	1	1	.91	.3	23.29	Inactive	61.4	2.38	1
992	41	17.89	33.27	51.16	41.64	74.91	23.56	.58	1.78	15.39	.51	.53	8.17	2.47	2.08	3.27	2.06	.75	October	-2.79	3	1	0	3	.88	.05	18.16	Managerial & professional occupations	38.4	2	1
993	41	19.21	34.06	53.28	41.2	75.26	23.66	.62	1.91	15.39	.56	.56	8.27	2.03	1.56	2.73	1.41	.67	October	-1.39	3	1	0	1	.84	.2	18.16	Managerial & professional occupations	25.6	.94	0
994	41	34.03	41.23	75.26	36.71	77.94	25.12	1.07	2.79	16.15	.96	.81	8.97	2.42	1.83	3.13	1.88	.43	October	1.71	3	1	0	3	.77	.05	32.36	Routine & manual occupations	79.8	2.62	1
995	41	27.55	37.38	64.93	39.07	76.46	25.18	.89	3.21	15.94	.79	.92	9.24	1.49	1.32	3.14	2.02	.72	October	-3.79	3	1	0	1	.81	.05	20.84	Intermediate occupations	27.8	1.12	0
996	41	20.88	34.99	55.87	40.71	75.7	23.87	.66	2.05	15.5	.59	.61	8.37	1.95	1.61	2.81	1.65	.82	October	-.19	3	1	0	1	.55	.1	30.03	Managerial & professional occupations	55.6	6.03	0
997	41	21.33	34.22	55.55	40.69	74.91	23.81	.61	1.95	15.53	.54	.58	8.28	1.88	1.8	4.25	3.36	1.54	October	3.11	2	1	1	3	.66	.1	17.79	Inactive	76	2.47	0
998	41	21.61	34.59	56.2	40.59	75.18	23.68	.61	1.91	15.41	.54	.57	8.27	1.67	1.45	2.43	1.24	.57	October	.91	2	1	1	1	.59	.1	21.09	Managerial & professional occupations	91	3.79	0
999	41	21.79	34.87	56.66	40.46	75.33	23.72	.63	1.98	15.4	.56	.58	8.32	2.56	2.07	3.15	2.57	.97	October	.81	3	1	0	1	.91	.1	20.84	Inactive	50	2.52	0
1000	41	22.07	35.04	57.12	40.49	75.54	23.86	.64	2.06	15.48	.57	.61	8.37	1.86	1.63	3.22	2.26	.87	October	2.81	5	1	1	3	.34	1.2	21.09	Inactive	55.8	2.24	0
1001	41	22.2	35.83	58.03	40.11	75.94	24.01	.7	2.16	15.55	.62	.65	8.46	1.91	1.73	3.09	2.66	1.16	October	.01	3	1	1	1	.44	.05	21.27	Inactive	42.8	1.4	0
1002	41	20.77	34.01	54.79	41.04	75.05	23.69	.55	1.71	15.56	.49	.5	8.13	2.72	2.19	2.99	2.13	1.15	October	1.61	1	1	0	2	.91	.05	27.95	Managerial & professional occupations	28	.98	0
1003	41	20.24	34.52	54.76	40.57	75.09	23.61	.62	1.88	15.36	.55	.56	8.25	1.99	1.73	2.98	2.27	1	October	-2.49	2	1	0	3	.88	.2	16.07	Managerial & professional occupations	32.8	1.31	0
1004	41	19.65	34.31	53.96	41.08	75.4	23.74	.64	1.98	15.42	.57	.59	8.32	1.61	1.43	2.9	1.71	.91	October	-6.19	3	1	1	1	.88	.05	18.16	Managerial & professional occupations	48.6	2.35	0
1005	41	19.05	34.18	53.23	41.02	75.2	23.67	.62	1.92	15.39	.55	.57	8.28	1.54	1.39	2.71	2.4	.99	October	-8.79	1	1	1	1	.7	.05	31.69	Inactive	24.5	1.97	0
1006	41	21.19	35.04	56.23	40.7	75.74	23.84	.66	1.99	15.5	.59	.59	8.34	1.8	1.49	2.57	1.72	.71	October	-.19	3	1	1	1	.59	.05	18.16	Managerial & professional occupations	47.8	1.99	0
1007	41	20.47	34.82	55.29	40.57	75.39	23.75	.64	1.97	15.43	.57	.59	8.32	2.04	1.82	3.44	2.84	1.23	October	-.79	2	1	0	3	.84	.05	23.29	Managerial & professional occupations	25.4	1.12	1
1008	42	20.54	34.41	54.95	40.5	74.91	23.51	.59	1.82	15.3	.53	.53	8.21	3.04	2.62	5.41	3.46	1.35	February	7.21	1	1	0	4	-.17	.05	16.76	Managerial & professional occupations	68.6	2.21	1
1009	42	21.09	35.73	56.83	39.76	75.5	23.93	.67	2.02	15.55	.6	.59	8.38	2.6	2.23	4.19	2.99	1.18	February	2.21	1	1	0	2	-.32	2.6	25.7	Inactive	69.8	2.76	1
1010	42	21.43	35.12	56.55	40.16	75.28	23.72	.63	1.98	15.38	.56	.58	8.34	2.17	1.65	3.35	1.7	.53	February	5.81	2	1	1	3	-.28	.05	14.5	Managerial & professional occupations	32.2	1.32	0
1011	42	24.21	37.59	61.8	39.16	76.75	24.43	.79	2.43	15.77	.7	.73	8.66	1.75	1.64	3.54	2.1	1.14	February	-.79	2	1	0	1	-.24	.05	30.35	Managerial & professional occupations	90.6	4.24
1012	42	21.35	34.96	56.31	40.51	75.47	23.76	.64	2.04	15.39	.57	.6	8.37	2.2	2.12	4	3.47	1.91	February	1.21	1	4	1	4	.15	8.8	28.68	Managerial & professional occupations	60.2	2.98	1
1013	42	23.25	36.09	59.34	39.62	75.71	23.89	.67	2.07	15.49	.59	.61	8.4	2	1.8	3.95	2.17	1.14	February	3.21	3	4	0	1	-.1	.05	17.91	Routine & manual occupations	62.4	2.16	0
1014	42	24.62	36.58	61.2	38.83	75.41	23.85	.65	1.95	15.51	.58	.57	8.34	2.46	2.23	4.22	3.34	1.56	February	2.91	3	4	0	4	.01	.3	24.31	Routine & manual occupations	75	4.14	1
1015	42	26.82	38.28	65.09	38.42	76.7	24.59	.88	2.59	15.77	.79	.73	8.82	1.74	1.7	4.08	2.8	1.39	February	1.71	2	1	1	2	.12	.1	12.18	Intermediate occupations	89.2	3.23	0
1016	42	22.22	36.02	58.24	39.39	75.41	23.85	.66	1.98	15.49	.59	.57	8.36	1.97	1.77	2.79	2.42	1.19	February	2.81	3	1	0	2	-.68	.1	21.93	Routine & manual occupations	54.6	1.89	0
1017	42	20.25	34.73	54.98	40.67	75.4	23.75	.63	1.97	15.43	.56	.58	8.32	2.03	1.92	3.05	2.75	1.5	February	-.79	5	1	0	1	-.03	.2	23.29	Routine & manual occupations	23.8	1.21	1
1018	42	20.59	34.52	55.1	40.45	74.97	23.53	.6	1.83	15.31	.53	.54	8.22	1.76	1.59	3.29	2.37	.97	February	-6.09	1	1	1	1	.23	.05	16.76	Managerial & professional occupations	23.4	1.01	0
1019	42	21.82	34.08	55.9	40.6	74.68	23.59	.56	1.75	15.45	.5	.51	8.13	2.68	2.41	4.4	2.9	1.62	February	3.51	1	4	0	3	-.13	.05	16.39	Inactive	32.8	1.72	0
1020	42	30.06	39.4	69.45	38.41	77.81	25.31	.88	3.31	16.07	.78	1.02	9.25	1.51	1.44	3.48	2.6	1.27	February	-3.89	3	1	1	4	-.06	.05	23.29	Routine & manual occupations	102	4.37	0
1021	42	25.25	37.04	62.29	39.34	76.38	24.32	.72	2.49	15.62	.64	.73	8.7	2.22	2.01	3.85	2.82	1.23	February	-1.79	3	4	1	3	-.03	1.3	14.5	Routine & manual occupations	30.6	1.1	0
1022	42	21.98	35.58	57.56	39.66	75.24	23.73	.64	1.91	15.43	.57	.56	8.3	2.61	2.36	4.22	2.94	1.72	February	5.41	5	1	0	1	.05	.05	19.97	Routine & manual occupations	89.8	2.94	0
1023	42	29.51	38.27	67.78	38.73	77	25.3	.94	3.25	16.04	.84	.94	9.26	1.92	1.91	5.32	3.13	1.92	February	-3.99	4	4	0	3	-.1	.05	20.84	Intermediate occupations	15	1.25	0
1024	42	20	34.12	54.12	40.79	74.91	23.54	.6	1.87	15.3	.54	.55	8.24	2.3	2.01	4.46	2.77	1.03	February	2.91	3	1	0	1	-.42	.1	20.84	Unclassified [in work,occ unknown]	48.4	1.44	0
1025	42	24.86	36.24	61.1	39.49	75.73	24.38	.75	2.54	15.64	.67	.73	8.75	1.8	1.68	3.84	2.45	1.26	February	-2.09	3	4	0	1	-.13	.05	16.76	Intermediate occupations	29.6	1.27	0
1026	42	22.38	36.3	58.68	39.38	75.68	24	.69	2.05	15.59	.61	.6	8.41	1.86	1.67	3.64	2.39	.94	February	-1.79	3	4	1	3	-.1	.05	23.49	Inactive	49	1.9	0
1027	42	21.84	34.79	56.63	40.24	75.04	23.62	.61	1.91	15.35	.55	.56	8.28	2.32	2.31	5.06	3.51	1.98	February	2.81	3	1	1	1	-.24	.05	16.76	Intermediate occupations	61.4	2.22	0
1028	42	22.38	36.3	58.68	39.38	75.68	24	.69	2.05	15.59	.61	.6	8.41	2.11	1.92	3.63	2.73	1.23	February	.71	3	4	1	3	-.13	.05	23.49	Inactive	36	1.26	0
1029	42	20.75	34.44	55.2	40.57	75.01	23.66	.62	1.96	15.35	.55	.57	8.31	1.65	1.59	2.47	2.43	1.82	February	-7.09	2	1	0	3	-.06	.05	20.84	Inactive	37.4	1.76	0
1030	42	23.91	35.22	59.13	40.41	75.63	23.87	.55	1.72	15.72	.49	.51	8.14	1.8	1.62	2.51	1.64	1.05	February	1.91	2	4	1	2	-.1	.05	27.95	Intermediate occupations	40.2	1.86	0
1031	42	24.2	36.32	60.52	39.68	76	24.74	.81	2.85	15.76	.73	.82	8.98	1.49	1.4	3.37	2.45	1.37	February	-3.99	3	4	0	2	-.13	.1	20.84	Managerial & professional occupations	20.4	1.33	1
1032	42	23.78	36.66	60.44	39.74	76.4	24.2	.74	2.29	15.65	.66	.69	8.55	1.99	1.75	3.29	2.1	.98	February	-1.39	3	4	1	1	.05	.05	23.29	Managerial & professional occupations	68.6	3.02	0
1033	42	23.06	36.45	59.5	39.11	75.56	24.01	.68	2.05	15.59	.61	.6	8.42	2.42	2.03	3.56	2.41	1.01	February	-1.39	2	1	0	2	-.21	.05	43.71	Managerial & professional occupations	23.6	1.32	0
1034	42	22.98	36.64	59.62	39.15	75.79	24.2	.71	2.17	15.7	.63	.63	8.5	2.67	2.35	4.67	2.86	1.37	February	1.91	1	1	1	4	.19	.05	27.35	Intermediate occupations	43	1.28	1
1035	42	21.85	35.54	57.4	40.18	75.72	23.93	.68	2.11	15.51	.61	.63	8.42	1.73	1.72	3.07	2.72	1.69	February	6.41	3	4	0	1	-.13	.05	21.27	Managerial & professional occupations	42.8	1.4	0
1036	42	21.3	34.59	55.88	40.47	75.05	23.65	.62	1.95	15.35	.55	.57	8.3	2.9	2.28	4.82	2.07	1.03	February	7.61	5	1	0	4	.01	.05	20.84	Intermediate occupations	45.2	1.67	0
1037	42	21.09	35.06	56.16	40.08	75.15	23.65	.62	1.89	15.37	.55	.55	8.28	2.24	1.97	3.2	2.46	.73	February	3.31	3	4	1	4	-.03	.05	19.97	Intermediate occupations	27.4	.97	0
1038	42	20.13	35.1	55.23	40.15	75.25	23.75	.64	1.92	15.44	.57	.56	8.31	2.44	2.17	3.97	2.94	1.26	February	3.71	1	1	1	1	-.21	.05	22.98	Intermediate occupations	56.1	1.94	0
1039	42	29.48	38.86	68.33	38.49	77.35	25.01	.83	3.05	15.95	.74	.94	9.07	1.8	1.68	3.04	2.72	1.26	February	-4.49	3	1	1	1	-.39	.05	23.29	Inactive	75	2.86	1
1040	42	20.24	34.45	54.69	40.56	75.01	23.6	.61	1.9	15.33	.55	.55	8.27	1.47	1.34	2.23	1.83	.88	February	-4.09	3	4	1	4	.12	.05	14.5	Managerial & professional occupations	29.6	1.36	0
1041	42	21.44	34.84	56.29	40.37	75.21	23.68	.62	1.94	15.38	.55	.57	8.29	1.97	1.73	4	2.58	.99	February	-7.19	4	1	1	3	.01	.05	18.22	Inactive	52.2	2.43	0
1042	42	22.83	36.02	58.85	39.94	75.96	24.11	.69	2.32	15.53	.62	.68	8.58	1.56	1.44	2.87	2.36	1.26	February	-2.89	3	1	1	1	.26	.05	14.5	Intermediate occupations	70.2	2.42	0
1043	42	21.81	34.79	56.59	40.24	75.03	23.57	.6	1.86	15.34	.54	.55	8.24	2.09	1.94	4.47	3.51	1.56	February	-.09	3	1	0	4	-.03	.05	16.76	Managerial & professional occupations	37.4	1.37	0
1044	42	20.38	34.36	54.73	40.57	74.93	23.55	.6	1.85	15.31	.54	.54	8.24	1.86	1.6	3.34	2.31	1.3	February	-2.09	4	1	1	3	.15	.4	16.76	Routine & manual occupations	114	5.31	0
1045	42	25.84	37.44	63.28	39.07	76.51	24.24	.74	2.34	15.65	.66	.7	8.59	1.43	1.43	3.82	3.21	2.13	February	-1.79	3	1	1	1	-.06	.3	21.27	Intermediate occupations	105	4.17	0
1046	42	26.04	38.26	64.3	38.19	76.45	24.54	.79	2.42	15.86	.7	.71	8.69	1.92	1.73	3.53	3.31	1.36	February	.11	3	4	1	4	.01	.05	42.17	Intermediate occupations	41.6	1.6	0
1047	42	23.06	35.49	58.55	39.94	75.43	23.79	.64	2.01	15.45	.57	.6	8.34	2.14	2	3.77	2.41	1.44	February	2.31	3	1	1	4	.01	.05	23.29	Managerial & professional occupations	112.2	5.07	1
1048	42	23.33	35.99	59.32	39.8	75.8	23.97	.67	2.16	15.51	.6	.65	8.45	2.53	2.3	3.51	2.92	1.83	February	-.19	1	1	0	2	-.1	4.8	23.29	Intermediate occupations	69.2	2.85	1
1049	42	21.06	35.16	56.21	40.02	75.18	23.68	.63	1.9	15.39	.56	.55	8.29	1.95	1.83	3.72	3.16	1.4	February	-2.49	5	4	0	3	.01	.05	16.85	Managerial & professional occupations	22.6	1.23	1
1050	42	20.83	34.81	55.64	40.24	75.05	23.59	.61	1.85	15.34	.54	.54	8.25	1.65	1.51	3.43	2.13	.99	February	-8.29	3	4	1	3	-.06	.1	15.17	Routine & manual occupations	33	2.36	0
1051	42	23.45	35.96	59.4	39.63	75.59	23.83	.66	2.01	15.48	.59	.6	8.36	2.04	1.82	3.74	2.34	1.2	February	2.61	3	1	1	4	-.32	.4	21.27	Routine & manual occupations	33.8	1.16	0
1052	43	21.62	35.59	57.21	40.07	75.66	23.93	.69	2.12	15.5	.62	.63	8.43	2.09	1.81	2.46	2.1	1.36	February	1.71	3	2	0	3	2.87	.05	15.6	Routine & manual occupations	34.6	1.77	0
1053	43	24.73	36.64	61.37	39.36	76	24.11	.73	2.25	15.59	.65	.67	8.52	1.78	1.37	1.93	1.07	.53	February	-2.09	2	4	1	3	2.07	.05	16.07	Managerial & professional occupations	28.4	1.57	0
1054	43	23.82	36.39	60.21	39.55	75.94	24.16	.73	2.3	15.61	.66	.69	8.55	1.69	1.58	3.67	3.04	1.14	February	-7.59	3	2	0	4	2.47	.05	15.6	Intermediate occupations	17	1.31	0
1055	43	29.62	39.31	68.93	38.28	77.59	24.98	.94	2.92	15.98	.83	.89	8.99	2.33	2.24	3.92	2.79	1.77	February	6.91	1	4	1	4	2.07	.05	15.6	Inactive	28	1	0
1056	43	21.16	35	56.16	40.44	75.44	23.77	.66	2.01	15.43	.59	.6	8.34	2.74	2.37	4.79	2.68	1.28	February	4.71	1	2	1	3	3.3	3.7	19.85	Routine & manual occupations	51	1.54	1
1057	43	21.93	35.63	57.56	39.96	75.59	23.93	.69	2.12	15.51	.62	.63	8.42	1.68	1.48	3.43	2.12	.82	February	-2.79	3	4	0	3	2.07	.05	14.71	Intermediate occupations	20.6	1.21	0
1058	43	20.85	34.77	55.62	40.35	75.12	23.63	.62	1.88	15.37	.55	.56	8.26	1.55	1.38	2.34	2.01	.94	February	-2.89	3	2	1	1	2.36	.05	20.11	Managerial & professional occupations	26.4	1.56	0
1059	43	22.87	36.09	58.96	39.27	75.36	23.82	.65	1.95	15.48	.58	.57	8.34	2.17	1.79	2.79	1.86	1.04	February	1.41	3	2	1	1	3.44	.05	21.93	Managerial & professional occupations	67.6	2.38	0
1060	43	27.76	38.57	66.33	37.8	76.38	24.51	.8	2.39	15.83	.71	.68	8.69	1.65	1.5	3.15	2.36	.94	February	-2.09	4	4	1	4	2	.05	20.03	Managerial & professional occupations	56.8	2.5	0
1061	43	21.78	35.52	57.3	39.95	75.47	23.84	.67	2.04	15.47	.6	.61	8.37	1.67	1.53	3.27	2.35	.98	February	-5.99	3	4	1	2	2	.05	14.71	Routine & manual occupations	28.4	1.95	1
1062	43	22.7	36.04	58.73	39.69	75.73	24.01	.7	2.15	15.56	.63	.62	8.45	1.41	1.22	2.24	1.57	.71	February	-3.09	3	4	1	4	1.78	.05	22.16	Routine & manual occupations	34.8	2.04	0
1063	43	22.24	35.37	57.61	40.12	75.49	23.82	.66	2.04	15.46	.59	.6	8.36	2.33	1.51	1.67	1.36	.83	February	3.71	3	2	0	4	3.37	.05	19.85	Routine & manual occupations	68	2.9	0
1064	43	26.36	37.3	63.66	39.15	76.45	24.48	.8	2.57	15.74	.72	.78	8.73	1.72	1.68	2.8	2.55	1.28	February	-.99	3	4	1	3	1.6	.05	16.07	Managerial & professional occupations	40.8	2.08	0
1065	43	20.81	34.76	55.57	40.56	75.31	23.71	.65	1.97	15.4	.58	.58	8.31	1.77	1.58	3.53	2.2	1	February	5.71	3	4	1	3	1.89	.05	19.85	Managerial & professional occupations	41	1.54	0
1066	43	21.77	34.87	56.63	40.33	75.2	23.64	.63	1.91	15.37	.56	.56	8.26	2.39	2.13	3.72	2.54	1.41	February	1.91	3	2	1	1	3.34	.1	19.85	Intermediate occupations	42.2	1.85	0
1067	43	22.42	35.73	58.14	39.83	75.55	23.9	.68	2.08	15.5	.61	.62	8.4	2.45	2.08	3.62	2.42	1.09	February	3.71	3	4	0	3	2.03	.05	14.71	Managerial & professional occupations	35.4	1.12	0
1068	43	22.51	35.51	58.01	40.06	75.56	23.89	.68	2.1	15.48	.61	.63	8.41	1.38	1.3	2.6	2.05	1.04	February	-7.39	3	2	1	3	3.16	.1	16.07	Managerial & professional occupations	27	1.98	1
1069	43	22.38	35.53	57.91	40.05	75.57	23.87	.68	2.08	15.48	.61	.62	8.4	2.36	1.96	3.04	2.08	1.1	February	.31	3	2	0	2	3.3	.2	16.07	Routine & manual occupations	100	4.1	0
1070	43	25.54	37	62.55	39.36	76.36	24.45	.79	2.55	15.72	.71	.77	8.72	1.76	1.75	5.04	3.46	1.7	February	-3.59	3	4	0	4	1.85	.05	16.07	Intermediate occupations	17.8	1.09	0
1071	43	32.29	40.57	72.86	36.74	77.31	25.15	.95	2.86	16.09	.85	.8	9.05	2.23	1.19	1.32	.82	.65	February	.01	3	2	1	4	3.16	.2	22.38	Intermediate occupations	66.8	2.64	0
1072	43	22.35	35.59	57.95	39.97	75.56	23.86	.68	2.06	15.47	.61	.61	8.38	1.97	1.64	3.24	2.31	.76	February	-.09	1	2	1	3	2.9	3.1	16.07	Routine & manual occupations	51.4	2.16	0
1073	43	31.69	40.07	71.75	37.98	78.04	25.62	1.03	3.49	16.23	.92	1.07	9.38	2.07	1.77	3.15	2.33	.93	February	-2.49	1	4	0	4	2.03	.8	16.07	Routine & manual occupations	51.8	2.72	0
1074	43	37.89	43.27	81.15	36.57	79.84	26.29	1.27	3.91	16.6	1.13	1.22	9.69	2.28	2.2	4.32	3.47	2.07	February	-2.19	3	4	0	2	2.03	.05	15.6	Routine & manual occupations	30	1.55	0
1075	43	22.79	36.03	58.81	39.42	75.45	23.82	.68	2.03	15.45	.61	.59	8.37	1.59	1.21	1.64	1.18	.57	February	-5.19	3	2	1	4	2.94	.05	10.84	Intermediate occupations	30	1.82	0
1076	43	33.8	41.01	74.81	37.46	78.46	26.13	1.1	3.9	16.46	.98	1.21	9.67	2.08	1.87	3.56	2.97	1.22	February	-.09	3	2	1	2	2.07	.2	16.11	Managerial & professional occupations	66.6	2.1	0
1077	43	20.87	34.82	55.69	40.37	75.19	23.66	.63	1.91	15.38	.56	.56	8.28	2.63	2.2	4.68	2.59	1.08	February	1.51	2	2	0	2	3.41	.05	16.07	Managerial & professional occupations	88.2	3.3	0
1078	43	25.85	37.41	63.26	39.25	76.66	24.53	.83	2.59	15.77	.74	.79	8.76	2.24	1.67	2.4	1.67	.56	February	-2.09	3	2	1	4	2.58	.05	16.07	Routine & manual occupations	34	1.25	0
1079	43	20.83	34.71	55.54	40.55	75.25	23.67	.64	1.93	15.38	.57	.57	8.28	1.89	1.73	4.03	2.95	1.46	February	-.49	4	4	1	2	2.03	.8	19.85	Routine & manual occupations	37.2	1.95	1
1080	43	25.03	36.87	61.9	39.53	76.4	24.51	.8	2.62	15.74	.71	.79	8.77	1.81	1.62	3.94	2.19	.96	February	-1.79	3	4	1	2	1.96	.05	16.07	Managerial & professional occupations	40.6	2.48	0
1081	43	19.54	34.05	53.59	40.94	74.98	23.51	.6	1.83	15.3	.54	.54	8.21	2.09	1.68	2.59	1.69	.76	February	3.31	3	2	1	2	3.12	.1	11.2	Managerial & professional occupations	113.6	3.92	1
1082	43	21.19	35.01	56.2	40.43	75.44	23.77	.66	2.01	15.43	.59	.6	8.34	2	1.82	3.95	2.77	1.27	February	.21	5	4	0	4	1.93	.05	19.85	Intermediate occupations	22	1.43	0
1083	43	22.64	35.46	58.09	40.02	75.47	23.81	.66	2.02	15.46	.59	.6	8.35	2	1.59	2.79	1.47	.63	February	-1.99	3	2	0	3	3.37	.05	19.85	Managerial & professional occupations	16.2	.76	0
1084	43	22.39	35.67	58.06	40.06	75.73	23.97	.71	2.16	15.52	.63	.65	8.45	2.1	1.73	3.05	1.82	.91	February	1.31	3	4	0	1	2.07	.2	16.07	Routine & manual occupations	21.4	1.41	0
1085	43	19.46	34	53.47	40.97	74.97	23.51	.6	1.83	15.3	.54	.54	8.21	1.26	1.16	1.38	1.16	.88	February	-2.19	3	4	1	2	1.89	.05	11.2	Intermediate occupations	39.4	2.25	0
1086	43	19.23	33.87	53.09	41.06	74.93	23.47	.59	1.81	15.28	.53	.53	8.19	1.59	1.29	2.56	1.45	.59	February	-2.59	3	2	0	4	2.72	.3	17.68	Routine & manual occupations	56.4	2.69	0
1087	44	18.94	32.97	51.92	41.62	74.6	23.43	.54	1.67	15.35	.48	.49	8.08	2.34	1.85	2.98	1.67	1.04	May	3.51	1	1	1	3	-.46	.05	15.82	Routine & manual occupations	54.4	2.34	0
1088	44	18.43	33.88	52.32	41.07	74.95	23.56	.61	1.85	15.33	.54	.55	8.24	2.45	2.2	3.93	3	1.34	May	10.51	2	2	1	4	-.13	.05	20.11	Unclassified [in work,occ unknown]	55.6	1.82	1
1089	44	21.97	35.06	57.04	40.29	75.36	23.77	.64	2.01	15.42	.57	.59	8.35	1.76	1.53	2.65	1.94	1.2	May	-.19	5	1	0	4	-.46	.05	21.09	Routine & manual occupations	42	1.93	0
1090	44	18.41	33.78	52.19	41.27	75.05	23.59	.6	1.86	15.36	.54	.55	8.24	1.91	1.69	3.95	2.16	.94	May	-.79	3	1	1	4	-.42	.05	31.69	Managerial & professional occupations	44.8	2	1
1091	44	17.04	32.69	49.73	41.92	74.61	23.48	.56	1.72	15.36	.5	.51	8.12	2.36	2	3.26	2.22	1.01	May	1.21	5	1	1	2	-.39	.5	11.12	Managerial & professional occupations	86.2	4.04	0
1092	44	19.9	34.6	54.5	40.91	75.51	23.83	.65	2.05	15.46	.58	.62	8.37	1.78	1.61	3.59	2.34	1	May	-3.79	3	1	1	4	-.46	.3	30.03	Intermediate occupations	68.8	3.19	0
1093	44	16.97	32.85	49.82	41.74	74.6	23.42	.56	1.71	15.31	.5	.5	8.12	2.5	2.46	4	3.48	1.89	May	2.81	1	2	0	3	.01	.05	18.74	Intermediate occupations	24.2	1.37	0
1094	44	21.15	34.05	55.2	40.75	74.8	23.73	.59	1.87	15.52	.53	.55	8.22	2.57	2.37	4.74	3.38	1.65	May	7.81	3	1	1	4	-.5	.05	16.39	Routine & manual occupations	44	1.54	0
1095	44	17.12	32.76	49.89	41.91	74.67	23.51	.56	1.74	15.38	.5	.51	8.13	1.89	1.84	3.47	2.79	1.8	May	2.51	2	1	0	3	-.39	.05	11.12	Managerial & professional occupations	60	2.77	1
1096	44	22.3	34.41	56.71	40.46	74.87	23.78	.6	1.9	15.54	.53	.56	8.24	1.56	1.4	2.74	1.91	1.1	May	-3.49	3	1	0	4	-.42	.05	16.39	Intermediate occupations	31.5	1.62	1
1097	44	17.81	33.4	51.22	41.47	74.88	23.51	.59	1.8	15.32	.52	.53	8.19	2.02	1.69	3.35	1.89	.81	May	1.91	5	1	0	2	-.5	.1	30.03	Intermediate occupations	35.4	1.62	0
1098	44	21.97	35.06	57.04	40.29	75.36	23.77	.64	2.01	15.42	.57	.59	8.35	2.1	1.85	3.08	2.52	1.26	May	-.19	4	2	1	4	-.06	.05	21.09	Intermediate occupations	42.2	1.43	1
1099	44	17.9	33.37	51.26	41.51	74.88	23.54	.59	1.82	15.35	.53	.54	8.2	1.54	1.44	2.91	1.51	.98	May	.71	3	2	1	4	.05	.05	30.03	Intermediate occupations	39.2	1.34	0
1100	44	19.83	33.63	53.47	41.33	74.97	23.71	.58	1.86	15.49	.52	.56	8.22	1.83	1.64	2.15	1.83	1.18	May	.91	3	2	0	3	-.32	.05	15.82	Intermediate occupations	33.8	1.69	0
1101	44	17.05	32.7	49.75	41.93	74.63	23.49	.56	1.72	15.37	.5	.51	8.12	2.82	2.59	4.6	2.83	1.85	May	9.21	1	2	0	4	-.13	2	11.12	Managerial & professional occupations	100	3.11	1
1102	44	19.26	33.54	52.8	41.19	74.73	23.44	.57	1.75	15.29	.51	.51	8.15	2.09	1.93	4.22	2.78	1.6	May	6.51	1	2	1	3	-.03	.05	28.45	Managerial & professional occupations	85.4	2.46	1
1103	44	17.22	32.76	49.99	41.84	74.6	23.48	.56	1.72	15.37	.5	.51	8.12	2.13	1.66	2.51	1.9	.77	May	4.01	3	2	1	4	-.32	.05	11.12	Routine & manual occupations	52.6	1.96	0
1104	44	17.88	33.43	51.3	41.47	74.9	23.53	.59	1.81	15.33	.53	.53	8.2	1.95	1.94	3.37	3.14	1.7	May	4.11	2	2	1	2	-.06	.05	30.03	Inactive	90.4	4.03	0
1105	44	24.27	36.82	61.09	39.55	76.36	24.71	.82	2.76	15.83	.73	.84	8.88	1.7	1.43	2.78	1.71	.72	May	2.41	3	1	1	2	-.42	.05	22.98	Managerial & professional occupations	60	2.8	1
1106	44	19.7	33.41	53.11	41.18	74.59	23.49	.55	1.7	15.39	.49	.5	8.1	2.29	2.02	3.7	2.11	1.15	May	8.51	1	1	1	3	-.46	.05	17.79	Intermediate occupations	103	3.4	0
1107	44	17.67	33.23	50.91	41.57	74.8	23.52	.58	1.8	15.34	.52	.53	8.18	2.88	2.33	4	2.95	1.27	May	1.91	3	2	0	4	-.06	.05	18.74	Managerial & professional occupations	95.60001	2.9	0
1108	44	25.3	37.54	62.83	38.7	76.23	24.21	.73	2.24	15.67	.65	.65	8.54	2.64	2.26	4.21	2.88	1.21	May	3.71	5	2	0	4	-.1	1.2	27.12	Managerial & professional occupations	51	2.04	1
1109	44	17.15	32.99	50.14	41.68	74.67	23.44	.57	1.73	15.3	.51	.51	8.14	2.21	1.89	3.61	2.31	1.07	May	1.91	3	1	1	2	-.46	.05	18.74	Managerial & professional occupations	66.8	2.25	1
1110	44	21.36	33.72	55.09	40.84	74.57	23.44	.54	1.66	15.37	.48	.49	8.07	2.09	1.84	2.88	1.86	1.26	May	-2.09	5	2	1	2	-.1	.05	17.74	Managerial & professional occupations	97	3.31	1
1111	44	17.22	32.76	49.99	41.84	74.6	23.48	.56	1.72	15.37	.5	.51	8.12	1.84	1.59	3.26	1.88	.87	May	.81	3	1	1	4	-.42	.05	11.12	Routine & manual occupations	38.6	1.55	0
1112	44	26.89	36.55	63.43	39.43	75.98	24.89	.8	2.8	16.01	.71	.84	8.88	1.78	1.65	3.86	2.26	1.11	May	3.21	2	1	0	4	-.46	.05	17.79	Routine & manual occupations	32.8	1.83	0
1113	44	23.35	35.44	58.79	40.22	75.65	24.59	.75	2.59	15.85	.67	.78	8.74	1.84	1.7	3.71	2.34	1.04	May	1.11	3	1	0	2	-.42	.05	17.79	Routine & manual occupations	32.6	1.23	1
1114	44	17	32.87	49.87	41.74	74.61	23.43	.56	1.71	15.31	.5	.5	8.12	1.76	1.33	1.63	1.48	.79	May	-.09	2	2	0	2	-.06	.05	18.74	Inactive	45.6	1.51	0
1115	44	18.27	33.51	51.77	41.53	75.03	23.67	.61	1.9	15.42	.54	.56	8.25	2.47	1.95	2.82	2	1.03	May	2.51	3	2	1	3	-.1	.05	11.12	Intermediate occupations	24.8	1.01	0
1116	44	17.89	33.52	51.41	41.37	74.89	23.51	.59	1.8	15.32	.53	.53	8.19	2.79	1.96	1.92	1.8	1.09	May	6.01	5	2	0	2	-.06	.05	31.69	Inactive	46.8	1.97	0
1117	44	19.04	33.94	52.98	41.37	75.31	23.79	.63	1.97	15.49	.56	.59	8.3	2.67	2.35	3.46	3.06	1.56	May	5.31	1	2	0	4	-.06	.05	11.12	Intermediate occupations	28	1.43	0
1118	44	17.55	33.22	50.78	41.56	74.79	23.48	.58	1.77	15.31	.52	.52	8.17	2.47	2.23	3.63	2.94	1.74	May	12.51	3	1	0	3	-.42	.05	30.03	Managerial & professional occupations	87	1.84	0
1119	44	17.14	32.92	50.06	41.71	74.63	23.45	.57	1.73	15.32	.5	.51	8.13	1.99	1.75	2.2	1.7	1.26	May	-5.29	5	2	0	4	-.1	1.6	18.74	Routine & manual occupations	23.8	1.52	1
1120	44	17.16	33.07	50.23	41.6	74.67	23.41	.57	1.72	15.27	.51	.51	8.14	2.27	1.52	1.88	1.52	.66	May	.91	1	2	0	4	-.06	.2	21.09	Managerial & professional occupations	48.6	2.78	1
1121	44	18.11	33.37	51.48	41.49	74.85	23.65	.6	1.88	15.41	.54	.56	8.24	2.33	1.97	3.36	2.13	1.08	May	1.51	1	1	1	3	-.42	.05	11.12	Unclassified [in work,occ unknown]	29	1.53	1
1122	44	20.69	34.06	54.74	40.85	74.91	23.81	.61	1.96	15.52	.55	.58	8.29	1.98	1.48	2.43	1.34	.54	May	2.31	5	1	0	4	-.39	.05	17.79	Managerial & professional occupations	68.8	2.44	0
1123	44	20.41	33.85	54.26	40.92	74.78	23.68	.59	1.85	15.47	.52	.55	8.21	1.98	1.38	1.99	1.02	.48	May	.31	5	1	0	2	-.5	.05	17.79	Managerial & professional occupations	60.8	3.41	0
1124	44	20.52	34.98	55.5	40.62	75.6	23.88	.66	2.08	15.48	.59	.62	8.4	2.76	1.86	1.94	1.71	1.44	May	5.01	1	2	1	4	.01	.05	31.69	Intermediate occupations	33.6	1.16	1
1125	44	24.42	37.19	61.61	38.82	76.01	24.11	.71	2.12	15.65	.63	.62	8.46	2.36	1.73	2.17	1.71	.92	May	2.71	3	2	0	4	-.24	.4	31.71	Routine & manual occupations	55	2.15	0
1126	44	20.79	33.91	54.7	40.85	74.76	23.71	.58	1.84	15.51	.52	.54	8.2	2.09	1.91	4.81	2.8	1.14	May	-.49	2	1	1	4	-.42	.05	16.39	Managerial & professional occupations	27	1.16	0
1127	44	22.41	36.09	58.5	39.86	75.94	23.97	.69	2.13	15.53	.62	.63	8.44	1.6	1.53	3.43	2.74	1.24	May	-1.89	3	1	1	3	-.42	.05	21.27	Inactive	74.2	1.71	0
1128	44	27.11	37.71	64.82	39.37	77.09	25.06	.95	2.98	16.03	.85	.91	9.03	2.03	1.66	2.77	1.71	.68	May	5.81	3	1	1	4	-.39	.05	30.03	Intermediate occupations	84.8	3.29	0
1129	44	18.2	33.45	51.66	41.46	74.91	23.64	.61	1.89	15.4	.54	.56	8.25	1.89	1.63	2.32	1.76	1.11	May	-.29	3	2	0	4	-.03	.2	11.12	Routine & manual occupations	77.6	2.25	0
1130	44	26.04	36.78	62.83	39.63	76.41	25.23	.89	3.15	16.1	.8	.96	9.13	1.49	1.24	1.48	1.81	.72	May	-3.39	3	2	1	3	.01	.05	11.12	Routine & manual occupations	60.8	3.68	1
1131	44	17	32.87	49.87	41.74	74.61	23.43	.56	1.71	15.31	.5	.5	8.12	1.94	1.92	3.1	2.66	1.78	May	2.51	2	1	1	4	-.42	.05	18.74	Routine & manual occupations	53.2	1.74	0
1132	44	19.26	34.06	53.32	41.32	75.38	23.82	.63	2	15.5	.57	.6	8.32	1.67	1.42	2.78	1.67	.7	May	-.69	3	1	1	3	-.42	.05	11.12	Intermediate occupations	26.6	1.29	0
1133	44	18	32.48	50.48	42.01	74.49	23.25	.53	1.65	15.19	.48	.48	8.06	2.69	1.87	2.4	1.59	.7	May	1.41	2	2	0	2	-.1	.05	8.36	Managerial & professional occupations	27.6	1.5	0
1134	44	17.84	33.05	50.89	41.62	74.67	23.56	.57	1.78	15.4	.51	.53	8.16	1.2	1.03	2.81	1.34	.52	May	-11.09	3	2	1	2	.05	.05	11.12	Managerial & professional occupations	20	2.67	1
1135	44	20.54	33.88	54.42	40.89	74.77	23.69	.59	1.85	15.48	.52	.55	8.21	1.84	1.27	1.39	1.07	.69	May	-2.29	3	2	0	2	-.13	.05	17.79	Intermediate occupations	30.4	1.84	0
1136	45	32.13	42.48	74.61	36.16	78.64	25.73	.99	3.03	16.57	.88	.89	9.16	2.35	2.2	3.32	3.05	1.56	November	3.71	5	2	0	1	.23	.5	47	Routine & manual occupations	30.4	.87	0
1137	45	31.13	41.87	73	36.39	78.26	25.53	.94	2.85	16.5	.84	.84	9.03	2.11	1.78	2.57	1.83	1.18	November	-2.09	1	2	0	1	.19	2.6	47	Routine & manual occupations	26	1.47	1
1138	45	27.88	40.15	68.03	37.22	77.37	25.12	.89	2.6	16.27	.79	.77	8.85	1.88	1.62	1.93	1.73	1.22	November	-4.79	3	2	1	2	.62	.1	34.4	Routine & manual occupations	49.2	2.54	0
1139	45	27.64	39.94	67.58	37.26	77.2	24.91	.86	2.58	16.08	.76	.75	8.83	2	1.93	4.96	3.35	1.42	November	-1.79	5	2	0	2	.01	.1	34.51	Managerial & professional occupations	29.6	1.42	0
1140	45	35.71	43.58	79.29	35.45	79.03	26.53	1.27	3.67	16.82	1.14	1.01	9.71	1.98	1.68	3.7	1.94	.86	November	-4.49	2	2	1	3	.62	2.3	33.07	Intermediate occupations	31.4	1.74	0
1141	45	30.29	41.5	71.79	36.62	78.12	25.42	.94	2.78	16.43	.84	.82	8.98	1.94	1.42	1.68	1.37	.61	November	-.99	2	2	1	1	.48		47	Inactive	97.4	3.93	0
1142	45	28.25	40.64	68.9	37.18	77.83	25.15	.89	2.78	16.17	.8	.8	8.99	1.98	1.65	2.37	1.86	1.03	November	-7.49	3	2	1	2	.41	.4	51.01	Unclassified [in work,occ unknown]	42.8	2.43	1
1143	45	28.62	40.37	68.99	36.99	77.36	25.05	.88	2.66	16.16	.79	.78	8.88	1.67	1.67	3.54	2.69	1.66	November	-4.39	5	2	1	3	.59	.2	40.59	Managerial & professional occupations	44.4	1.86	1
1144	45	27.22	39.51	66.73	37.35	76.86	24.88	.83	2.43	16.16	.74	.71	8.72	2.03	1.87	4.17	2.27	1.18	November	.21	2	2	1	1	.26	.3	47	Inactive	137.6	7.19	0
1145	45	35.5	44.15	79.64	35.38	79.53	26.19	1.08	3.37	16.79	.96	.99	9.41	2.39	1.91	3.11	1.91	.88	November	.01	2	2	0	3	.55	.1	47	Routine & manual occupations	29.4	1.48	0
1146	45	29.14	40.56	69.7	36.97	77.53	25.22	.9	2.66	16.31	.81	.78	8.91	2.11	1.85	3.36	2.39	1.02	November	-2.69	3	2	0	3	.62	.6	33.07	Routine & manual occupations	19.4	1.22	0
1147	45	24.55	38.37	62.92	38.13	76.51	24.66	.8	2.36	15.99	.72	.69	8.67	1.82	1.72	2.89	2.07	1.36	November	-1.49	5	2	1	1	.26	.05	33.86	Managerial & professional occupations	45.6	1.81	0
1148	45	27.42	39.9	67.32	37.33	77.24	25.05	.87	2.56	16.24	.78	.75	8.82	2.8	2.33	4.37	2.83	1.06	November	.21	5	2	0	1	.15	.2	34.4	Managerial & professional occupations	57.6	2.34
1149	45	30.08	41.38	71.46	36.72	78.1	25.5	1	2.96	16.4	.89	.88	9.1	1.43	1.41	2.38	2.11	1.54	November	-9.79	3	2	1	1	.62	.7	40.4	Routine & manual occupations	44.2	3.51	0
1150	46	23.57	37.76	61.33	38.42	76.18	24.49	.76	2.21	15.93	.67	.65	8.56	2.31	1.93	4.1	2.35	.87	November	4.51	1	1	0	1	.88	.05	36.49	Intermediate occupations	31.4	1.14	0
1151	46	28.61	39.24	67.84	37.22	76.46	24.58	.76	2.25	15.99	.68	.66	8.59	2.29	1.93	3.95	2.5	.99	November	4.51	3	1	0	3	1.2	.05	36.49	Routine & manual occupations	62	2.08	0
1152	46	24.58	38.19	62.77	38.19	76.38	24.58	.76	2.26	15.97	.68	.67	8.6	2.07	1.81	2.31	2.16	1.34	November	-2.29	2	1	0	1	.91	.1	36.49	Managerial & professional occupations	37.4	1.82	0
1153	46	25.89	38.23	64.12	37.96	76.19	24.44	.74	2.18	15.91	.66	.64	8.53	2.12	1.54	2.1	.99	.35	November	2.71	2	1	0	1	.91	2	35.88	Routine & manual occupations	96.6	3.49	0
1154	46	27.91	38.8	66.71	37.44	76.24	24.41	.73	2.15	15.89	.65	.63	8.51	2	1.33	1.48	.95	.5	November	-3.79	3	1	0	2	.91	.6	34.53	Routine & manual occupations	29	.37	0
1155	46	30.71	39.67	70.39	36.79	76.46	24.48	.73	2.16	15.95	.66	.63	8.53	2.13	1.84	3.08	2.62	.92	November	.61	2	1	0	3	.91	2.2	35.88	Inactive	39.6	.83	0
1156	46	31.02	39.71	70.73	36.71	76.42	24.53	.75	2.21	15.97	.67	.65	8.56	1.83	1.44	2.37	1.65	.54	November	-2.49	3	1	1	3	1.2	.3	35.88	Inactive	58.6	3.16	1
1157	46	26.33	38.32	64.65	37.81	76.13	24.38	.73	2.15	15.86	.65	.63	8.51	2.69	1.98	1.32	1.95	1.17	November	.71	2	1	1	3	.91	.05	34.53	Routine & manual occupations	19.2	1.02	0
1158	46	24.98	38.48	63.46	38.04	76.52	24.68	.79	2.32	16.03	.7	.68	8.65	2.75	1.49	2.15	.65	1.76	November	-2.09	1	1	0	1	1.24	7.7	38.25	Inactive	26	1.34	1
1159	46	24.96	38.6	63.56	38.02	76.62	24.73	.82	2.4	16.03	.73	.7	8.7	1.84	1.59	2.72	2.14	.81	November	-4.09	2	3	0	1	.73	.05	33.86	Intermediate occupations	30	2.41	0
1160	46	27.15	38.75	65.9	37.64	76.39	24.44	.74	2.2	15.89	.66	.64	8.55	2.84	1.8	2.54	1.35	.81	November	-2.39	3	1	0	1	1.09	.05	34.53	Managerial & professional occupations	20.4	.98	0
1161	46	25.86	38.87	64.72	37.82	76.69	24.74	.79	2.35	16.07	.71	.69	8.67	3.01	2.35	4.09	2.57	.83	November	.91	2	1	0	1	.88	.05	44.1	Intermediate occupations	25.2	1.22	0
1162	46	26.95	38.46	65.41	37.65	76.11	24.38	.73	2.15	15.87	.65	.63	8.51	1.9	1.6	4.37	2.71	1	November	1.61	2	1	1	3	1.13	.05	35.88	Managerial & professional occupations	41.8	2.34	0
1163	47	28.44	39.86	68.3	36.94	76.8	24.79	.82	2.43	16.06	.74	.71	8.73	1.47	1.18	2.07	1.23	.54	December	-6.89	5	3	0	1	.41	.05	27.57	Managerial & professional occupations	19.8	.81	1
1164	47	26.28	39.38	65.66	37.6	76.98	24.96	.86	2.54	16.14	.77	.73	8.82	1.4	1.23	2.17	1.42	.76	December	-3.69	3	3	1	1	.37	.05	50.67	Managerial & professional occupations	46	1.5	1
1165	47	24.81	38.44	63.25	38.01	76.45	24.73	.81	2.37	16.04	.72	.69	8.69	1.52	1.42	3.51	2.2	1.19	December	-3.69	3	3	0	1	.37	.05	33.62	Managerial & professional occupations	36	1.01	1
1166	47	29.08	40.13	69.21	36.78	76.9	24.88	.85	2.5	16.11	.76	.73	8.77	2.68	1.8	1.95	1.52	1.03	December	6.11	1	3	0	3	.34	.7	27.57	Intermediate occupations	89.2	2.73	1
1167	47	27.97	39.73	67.7	37.04	76.77	24.76	.81	2.41	16.05	.73	.71	8.71	2.28	1.92	3.49	2.25	.92	December	2.51	2	3	0	2	.34	.1	27.57	Intermediate occupations	36.4	1.82	0
1168	47	30.22	40.97	71.18	36.64	77.61	25.66	1.04	3.07	16.42	.93	.86	9.25	2	1.8	3.35	2.22	1.18	December	4.01	2	3	0	2	.3	2	33.62	Managerial & professional occupations	124.8	4.3	0
1169	47	25.29	38.71	64	37.85	76.56	24.76	.82	2.4	16.04	.73	.69	8.72	2.35	1.88	2.97	1.97	.96	December	7.31	5	3	0	1	.44	1.6	33.62	Managerial & professional occupations	80.9	2.44	0
1170	47	29.01	40.43	69.45	36.81	77.25	24.96	.86	2.53	16.16	.77	.74	8.8	1.79	1.53	1.9	1.46	1.13	December	-1.49	1	3	1	1	.23	1.2	48.95	Routine & manual occupations	36.1	1.36	1
1171	47	25.52	38.82	64.33	37.8	76.62	24.81	.83	2.44	16.07	.74	.7	8.75	1.69	1.43	2.59	1.78	.73	December	-5.39	1	3	1	1	.41	3.7	33.62	Intermediate occupations	34	.69	1
1172	47	39.6	45.46	85.07	34.2	79.66	27.06	1.35	4.16	17.04	1.2	1.19	10.02	1.64	1.35	2.99	1.52	.45	December	-1.49	2	3	0	1	.15	.9	55.77	Routine & manual occupations	19.4	1.04	0
1173	47	31.83	42.11	73.94	36.24	78.35	25.86	1.02	3.3	16.43	.91	.9	9.43	1.54	1.18	2.24	1.36	.47	December	-5.29	2	3	1	1	.44	.2	50.67	Managerial & professional occupations	52.6	1.89	0
1174	47	29.27	40.6	69.86	36.65	77.24	25.18	.91	2.72	16.25	.82	.81	8.93	2.44	2.07	3.36	2.63	1.1	December	.61	1	3	1	2	.41	.05	32.82	Managerial & professional occupations	24	.12	1
1175	47	28.53	39.89	68.41	36.98	76.86	24.83	.83	2.45	16.08	.74	.71	8.75	1.57	1.33	2.68	1.62	.65	December	-3.49	2	3	1	2	.52	.05	34.55	Intermediate occupations	29.6	1.62	0
1176	47	30.24	41.03	71.28	36.58	77.62	25.1	.89	2.65	16.2	.8	.77	8.89	2.07	1.88	3.15	2.12	1.38	December	-.89	2	3	0	2	.48	.05	50.67	Intermediate occupations	20.4	1.05	0
1177	47	27.95	40.09	68.04	37.19	77.27	25.26	.94	2.76	16.26	.84	.78	9	2.02	1.65	1.39	1.47	.92	December	-.49	4	3	0	1	.52	.05	50.67	missing	103.4	4.6	1
1178	47	28.57	40.03	68.59	36.99	77.01	24.9	.84	2.51	16.11	.75	.73	8.79	1.96	1.47	2.82	1.4	.53	December	5.51	5	3	1	1	.34	2	34.55	Routine & manual occupations	83.8	2.65	1
1179	48	29.41	40.94	70.36	36.46	77.41	25.29	.93	2.78	16.31	.83	.81	8.98	2.43	1.7	1.77	1.79	1.32	December	-3.39	2	2	0	1	.05	.1	45.54	Routine & manual occupations	29.8	2.24	0
1180	48	36.87	43.81	80.68	35.18	78.99	26.39	1.27	3.75	16.66	1.13	1.06	9.73	3.02	1.89	1.7	1.69	.76	December	2.21	2	2	1	2	-.06	.05	44.89	Inactive	54	2.87	0
1181	48	26.82	39.41	66.23	37.22	76.62	24.79	.82	2.43	16.07	.73	.7	8.72	2.45	1.95	2.93	2.08	.89	December	-1.79	3	2	0	1	-.17	.05	46.07	Inactive	26.4	1.48	0
1182	48	31.19	41.71	72.9	36.12	77.83	25.56	.96	3.06	16.35	.86	.86	9.21	1.9	.98	.91	.89	.42	December	-.69	5	2	1	2	-.06	1.5	51.52	Unclassified [in work,occ unknown]	113.4	5.03	0
1183	48	26.53	39.29	65.82	37.3	76.59	24.77	.82	2.41	16.06	.73	.7	8.71	2.15	1.64	2.12	1.49	.84	December	.01	3	2	1	3	.08	.05	46.07	Routine & manual occupations	69.8	3.01	0
1184	48	27.96	40.01	67.96	36.86	76.87	24.94	.86	2.53	16.15	.77	.74	8.79	2.4	1.83	2.69	1.81	.9	December	.71	3	2	1	1	.19	.05	45.54	Routine & manual occupations	70	2.59	0
1185	48	26.81	39.63	66.45	37.19	76.82	24.92	.85	2.54	16.12	.76	.73	8.8	1.99	1.41	1.6	1.3	.86	December	-.39	5	2	0	1	.01	.05	53.39	Inactive	25.8	1.46	0
1186	48	27.99	39.95	67.94	36.87	76.82	24.9	.85	2.51	16.13	.76	.73	8.77	2.12	1.55	1.69	1.5	1.03	December	.81	2	2	1	2	.12	.05	51.52	Routine & manual occupations	77.6	3.53	0
1187	48	29.28	41.07	70.35	36.5	77.57	25.34	.93	2.84	16.33	.83	.83	9.01	2.41	1.77	1.94	1.43	1.04	December	-4.29	3	2	0	1	.05	.6	45.54	Routine & manual occupations	20.8	1.28	0
1188	48	26.84	39.58	66.42	37.18	76.75	24.86	.84	2.49	16.1	.75	.72	8.77	2.11	1.96	3.24	2.53	1.51	December	4.01	2	2	1	3	.12	.05	53.39	Inactive	88	3.18
1189	48	28.87	40.57	69.44	36.67	77.24	25.14	.9	2.7	16.22	.8	.78	8.93	3.05	2.41	4.13	2.74	1.72	December	2.41	1	2	0	1	.05	10	51.52	Managerial & professional occupations	34.8	1.29	1
1190	48	28.31	40.41	68.72	36.78	77.19	25.16	.91	2.7	16.24	.81	.78	8.92	2.24	1.74	2.59	2	.75	December	3.61	2	2	0	3	-.32	.4	60.86	Intermediate occupations	95.6	2.73	0
1191	48	30.29	40.83	71.12	36.4	77.23	25.2	.92	2.74	16.25	.82	.79	8.96	1.88	1.63	2.59	1.95	1.04	December	.91	5	2	1	1	-.24	.05	40.59	Unclassified [in work,occ unknown]	75.8	2.48	0
1192	48	55.78	53.08	108.86	31.57	84.65	29.43	1.86	5.9	18.17	1.66	1.77	11.26	2.37	.95	.96	.63	.52	December	2.91	2	2	1	2	-.5	.1	39.36	Managerial & professional occupations	27.4	1.4	0
1193	49	24.05	37.16	61.22	38.56	75.72	24.09	.69	2.02	15.69	.62	.59	8.4	2.78	2.02	2.44	2.08	1.04	May	6.11	5	2	1	4	.19	.2	29.92	Managerial & professional occupations	65.2	1.96	1
1194	49	23.05	37.45	60.5	38.62	76.06	24.39	.75	2.19	15.85	.67	.64	8.55	2.3	1.8	2.19	1.98	.81	May	1.61	5	2	0	2	-.1	.2	31.42	Inactive	91.8	2.69	1
1195	49	43.63	48.15	91.78	34.2	82.35	26.88	1.29	4.1	16.93	1.15	1.21	9.96	2.66	2.39	5.75	3.31	1.54	May	10.01	2	3	1	3	-1.11	.05	46.44	Inactive	49	1.97	0
1196	49	25.64	37.81	63.45	38.1	75.92	24.23	.71	2.1	15.77	.64	.62	8.46	2.21	1.75	2.2	1.68	.8	May	.51	1	2	1	3	-.24	2.5	34.19	Routine & manual occupations	30.8	1.81	1
1197	49	29.9	39.74	69.64	37.05	76.78	24.79	.82	2.5	16.05	.73	.76	8.74	2.05	2.03	3.62	3.11	1.64	May	3.31	2	3	1	4	-1.29	.05	34.19	Inactive	35.4	1.07	0
1198	49	25.66	39.06	64.71	37.55	76.61	24.8	.82	2.45	16.06	.74	.71	8.74	1.83	1.65	2.86	2.5	1.52	May	1.01	3	3	1	2	-1.76	.05	41.73	Routine & manual occupations	20.6	.51	0
1199	49	28.01	39.66	67.67	37.02	76.68	24.76	.82	2.41	16.05	.73	.7	8.71	1.75	1.57	3.39	2.6	.98	May	-.99	3	3	1	4	-1.15	.05	27.57	Intermediate occupations	60.4	3.09	0
1200	49	25.57	37.94	63.52	38.07	76.01	24.31	.75	2.24	15.75	.67	.65	8.56	1.49	1.28	2.82	1.93	.85	May	-.19	2	3	0	3	-1	.2	33.88	Routine & manual occupations	44.1	2.02	0
1201	49	27.39	38.67	66.06	37.62	76.29	24.4	.73	2.15	15.89	.65	.63	8.52	2.29	1.95	3.04	2.33	1.14	May	4.31	3	2	1	4	-.13	1	37.37	Routine & manual occupations	118	3.15	0
1202	49	24.54	37.32	61.85	38.43	75.74	24.1	.69	2.03	15.7	.62	.59	8.41	2.41	2.12	4.32	2.39	1.47	May	1.21	5	3	1	3	-1.47	.3	29.92	Managerial & professional occupations	43.4	1.88	1
1203	49	29.14	39.15	68.29	37.23	76.39	24.52	.77	2.3	15.92	.68	.69	8.6	2.62	1.95	2.44	1.77	1.24	May	8.31	5	2	1	4	.26	.5	34.19	Managerial & professional occupations	50.8	1.79	1
1204	49	27.15	39.12	66.27	37.54	76.67	24.65	.79	2.33	16.01	.7	.69	8.65	2.2	1.68	2.35	1.74	.96	May	.51	1	3	1	4	-1.07	.1	42.22	Routine & manual occupations	53.2	1.99	1
1205	49	31.89	40.63	72.53	36.59	77.22	24.92	.83	2.49	16.17	.74	.75	8.75	2.19	1.8	2.01	1.9	1.09	May	4.31	1	2	1	4	.08	6.1	34.19	Routine & manual occupations	118.6	3.5
1206	49	26.45	38.35	64.79	37.92	76.27	24.3	.7	2.05	15.85	.62	.6	8.45	2.1	1.81	3.08	2.22	.85	May	-1.99	5	3	0	4	-1.15	.05	29.92	Routine & manual occupations	28.6	.93	1
1207	49	28.32	39.05	67.37	37.37	76.42	24.47	.75	2.21	15.91	.67	.65	8.56	2.04	1.77	3.5	2.09	1.1	May	1.11	1	2	1	4	-.21	.05	37.37	Managerial & professional occupations	66.2	1.78	1
1208	49	24.95	37.57	62.52	38.29	75.86	24.18	.7	2.05	15.76	.62	.6	8.43	1.94	1.63	2.59	1.93	.87	May	1.91	2	2	1	3	.08	.9	29.92	Routine & manual occupations	53.6	2.1
1209	49	26.92	38.45	65.37	37.78	76.23	24.32	.71	2.07	15.86	.63	.61	8.46	1.86	1.2	1.35	1.02	.37	May	1.11	1	2	0	4	-.13	.2	29.92	Managerial & professional occupations	53.2	1.63	1
1210	49	23.91	37.2	61.11	38.57	75.77	24.14	.7	2.05	15.71	.62	.6	8.43	1.61	1.46	2.9	2.53	1.02	May	.61	3	3	1	2	-1	.4	29.92	Managerial & professional occupations	51	1.84	0
1211	49	29.55	39.96	69.51	37.07	77.02	24.77	.82	2.37	16.1	.73	.71	8.67	2.13	1.78	3	2.29	1.1	May	-4.89	3	2	0	4	-.24	.05	37.37	Managerial & professional occupations	20.6	1.5	0
1212	49	24.62	38.36	62.98	38.13	76.5	24.65	.8	2.38	15.97	.72	.69	8.69	2.18	1.77	2.63	1.79	.9	May	-1.79	5	2	0	4	-.06	.05	27.35	Managerial & professional occupations	23	1.54	1
1213	49	25.57	38.05	63.63	38.08	76.14	24.33	.72	2.12	15.83	.64	.62	8.5	1.7	1.36	1.71	1.7	.58	May	-5.79	2	3	1	3	-1	.05	37.37	Routine & manual occupations	35	2.4	0
1214	49	25.86	38.96	64.82	37.83	76.79	24.74	.82	2.42	16.03	.73	.72	8.72	1.98	1.8	2.96	2.34	1.31	May	.81	5	2	0	4	.48	.6	35.41	Intermediate occupations	53.6	1.74	1
1215	49	26.67	38.35	65.02	37.84	76.19	24.31	.71	2.07	15.85	.63	.61	8.46	2.16	1.69	3.14	2.01	.49	May	1.21	5	3	1	4	-1.18	.05	29.92	Intermediate occupations	43	1.55
1216	49	27.56	39.85	67.41	37.04	76.89	24.94	.87	2.55	16.14	.77	.75	8.8	1.67	1.48	3.04	1.9	.84	May	-2.79	3	3	1	4	-1.11	.1	43.3	Intermediate occupations	25.4	1	0
1217	49	26.01	38.26	64.26	37.97	76.23	24.39	.75	2.22	15.84	.67	.65	8.55	2.65	1.63	1.98	1.2	.79	May	1.61	2	2	0	4	-.28	.05	34.53	Managerial & professional occupations	20	.87	0
1218	49	26.34	38.3	64.64	37.93	76.23	24.3	.7	2.06	15.85	.63	.6	8.45	1.84	1.44	2.55	1.31	.56	May	-6.79	2	2	0	4	-.35	.9	29.92	Intermediate occupations	18.8	1.66	0
1219	49	25.94	37.76	63.7	38.06	75.82	24.15	.69	2.03	15.73	.62	.59	8.41	2.56	2.14	2.9	2.42	1.08	May	8.71	1	2	0	4	.91	.05	29.92	Intermediate occupations	35.8	1.05	0
1220	49	24.97	37.72	62.69	38.29	76.02	24.22	.7	2.04	15.79	.62	.6	8.43	2.55	1.64	1.99	1.31	1.15	May	3.81	1	2	0	4	.08	.05	29.92	Managerial & professional occupations	57.4	2.48	1
1221	49	25.3	37.96	63.26	38.16	76.13	24.32	.72	2.12	15.83	.64	.62	8.49	2.26	1.92	2.63	2.67	1.62	May	-.79	3	2	0	2	-.17	.05	37.37	Managerial & professional occupations	48.8	1.93	0
1222	49	26.19	38.42	64.61	37.95	76.36	24.51	.77	2.29	15.91	.69	.68	8.6	2.17	1.77	3.07	2.29	.77	May	7.61	5	3	1	2	-1.33	.1	34.19	Inactive	46.2	1.11	1
1223	49	24.51	38.15	62.66	38.24	76.39	24.51	.76	2.26	15.9	.68	.66	8.61	1.21	1.05	1.54	1.43	.52	May	-5.89	3	2	1	4	.15	.05	35.41	Managerial & professional occupations	39	2.48	0
1224	49	25.6	37.65	63.25	38.16	75.81	24.15	.7	2.05	15.72	.63	.6	8.42	1.79	1.47	2.12	1.61	.9	May	.41	3	2	1	4	-.21	.05	29.92	Routine & manual occupations	39.4	1.56	0
1225	49	26.77	38.6	65.36	37.75	76.35	24.45	.75	2.19	15.9	.67	.64	8.54	2.25	2	3.3	2.59	1.28	May	8.11	3	2	1	4	.01	.1	40.93	Managerial & professional occupations	54.8	1.63	0
1226	49	30.19	39.84	70.03	36.96	76.8	24.55	.73	2.14	16.02	.65	.63	8.52	1.85	1.62	2.28	2.03	1.21	May	-2.89	2	2	1	3	-.1	.05	37.37	Inactive	94	4.3	0
1227	49	25.18	37.99	63.17	38.08	76.08	24.4	.73	2.15	15.89	.66	.63	8.52	2.12	1.79	2.33	2.44	.96	May	3.41	2	3	0	4	-1.22	2.1	29.9	Routine & manual occupations	82.4	2.55	0
1228	50	25.92	39.12	65.04	37.57	76.69	24.8	.84	2.46	16.05	.75	.71	8.75	2.29	1.92	4.09	2.4	.94	May	-2.59	1	1	1	3	-.13	.3	43.25	Intermediate occupations	31.6	1.87	1
1229	50	23.88	37.84	61.72	38.31	76.15	24.46	.75	2.2	15.89	.67	.64	8.57	2.54	1.96	2.94	1.7	.9	May	-2.29	5	1	0	4	1.38	1.1	37.17	Inactive	33.4	4.5	1
1230	50	23.18	37.43	60.61	38.58	76.01	24.39	.74	2.15	15.87	.66	.63	8.52	1.79	1.62	3.72	2.71	1.01	May	-2.49	4	1	1	4	.15	.1	29.9	Intermediate occupations	24.8	.54	0
1231	50	28.96	40.1	69.07	36.82	76.92	24.85	.83	2.48	16.09	.74	.73	8.76	1.66	.97	2.05	.38	.21	May	-1.09	2	3	0	4	.37	.05	27.57	Managerial & professional occupations	22.8	.84	0
1232	50	25.83	39.03	64.86	37.85	76.88	24.82	.81	2.47	16.07	.72	.73	8.75	2.19	1.94	3.78	3.05	1.12	May	-1.49	2	1	0	2	.26	.05	39.55	Managerial & professional occupations	33.2	2.66	0
1233	50	26.84	39.25	66.09	37.31	76.55	24.69	.8	2.35	16.02	.72	.69	8.67	3.05	2.64	4.46	3.49	1.51	May	-1.19	4	1	1	3	2.4	.05	27.57	Managerial & professional occupations	84.8	4.21	0
1234	50	29.57	40.24	69.81	36.65	76.89	24.81	.82	2.43	16.08	.73	.71	8.73	3.01	2.33	4.81	2.31	.88	May	-2.59	5	1	1	2	2.32	.05	27.57	Inactive	32.8	1.68	1
1235	50	30.7	42.07	72.77	36.45	78.53	25.44	.98	3.02	16.29	.87	.88	9.15	2.19	1.7	3.3	1.58	.64	May	4.91	2	1	1	3	.23	.3	48	Routine & manual occupations	67.6	2.7	1
1236	50	27.11	39.37	66.48	37.24	76.61	24.73	.82	2.39	16.03	.73	.7	8.69	2.32	2.09	3.93	2.74	1.33	May	4.51	5	3	1	4	.41	.05	27.57	Managerial & professional occupations	53.6	1.48	0
1237	50	28.32	39.8	68.11	36.97	76.76	24.79	.83	2.43	16.06	.74	.71	8.73	2.35	1.92	2.78	2.4	.91	May	1.81	1	1	0	2	.12	.2	27.57	Intermediate occupations	56.2	2.33	1
1238	50	26.95	39.75	66.71	37.34	77.09	25.03	.87	2.63	16.16	.77	.78	8.87	1.88	1.39	2.89	1.47	.44	May	.11	2	1	0	4	.23	1.3	33.34	Inactive	33.2	2.65	0
1239	50	31.08	41.24	72.33	36.31	77.55	25.27	.93	2.8	16.28	.83	.83	8.99	2.2	1.69	3.11	1.59	.66	May	3.61	5	3	0	4	.37	.8	50.04	Unclassified [in work,occ unknown]	101.6	2.93	1
1240	50	25.85	39.23	65.07	37.63	76.85	24.84	.83	2.49	16.06	.74	.73	8.77	2.14	1.8	3.41	1.96	.88	May	3.21	1	3	1	2	.41	6.1	39.5	Routine & manual occupations	94.7	3.83	1
1241	50	26.18	39.17	65.36	37.39	76.56	24.74	.82	2.41	16.04	.73	.7	8.71	2.14	1.71	2.87	1.78	.8	May	2.31	4	3	0	4	.52	.05	41.73	Managerial & professional occupations	41.8	1.49	0
1242	50	27.22	39.92	67.13	37.2	77.12	25.09	.86	2.5	16.33	.76	.73	8.76	1.68	1.47	3.71	2.09	.81	May	5.41	2	1	1	4	.08	.3	42.58	Intermediate occupations	94.2	4.01	0
1243	50	28.22	39.66	67.88	36.96	76.62	24.71	.81	2.36	16.03	.72	.69	8.68	2.93	2.45	5	2.93	1.2	May	-.09	3	1	0	3	1.53	.05	27.57	Routine & manual occupations	43.2	6.03	1
1244	50	31.81	41.29	73.11	36.16	77.45	25.09	.88	2.66	16.19	.78	.78	8.9	2.25	1.72	2.39	1.84	.7	May	1.21	3	3	1	4	.41	.8	27.57	Inactive	54.4	1.96	0
1245	50	34.7	43.5	78.2	35.53	79.03	25.92	1.02	3.36	16.52	.91	.99	9.4	2.45	2.19	4.25	3.38	1.47	May	-6.89	3	1	0	2	2.69	.1	50.04	Routine & manual occupations	29.8	2.45	0
1246	50	29.52	41.57	71.09	36.79	78.36	25.41	.94	2.84	16.38	.84	.83	9.03	2.44	2.05	3.9	2.44	1.06	May	1.41	2	1	1	2	.26	.05	47.82	Managerial & professional occupations	35.6	1.59	0
1247	50	30.09	40.93	71.02	36.49	77.42	25.28	.94	2.81	16.29	.84	.83	9	1.73	1.5	2.24	1.86	1.12	May	-6.39	3	3	1	2	.3	.05	32.82	Intermediate occupations	61.9	2.46	0
1248	50	30.28	40.92	71.2	36.47	77.39	25.23	.93	2.77	16.26	.83	.82	8.96	2.63	2.07	3.49	2.03	.77	May	4.21	2	3	1	2	.41	.05	32.82	Managerial & professional occupations	92.4	2.33
1249	50	27.22	39.92	67.13	37.2	77.12	25.09	.86	2.5	16.33	.76	.73	8.76	3.62	2.9	5.57	3.62	1.27	May	2.31	2	1	0	4	2.07	.05	42.58	Unclassified [in work,occ unknown]	34.8	2	0
1250	50	28.81	39.95	68.76	36.83	76.78	24.81	.83	2.44	16.08	.74	.72	8.73	2.36	1.78	3.52	1.8	.58	May	2.91	4	3	1	4	-.03	.5	27.57	Inactive	106.8	3.42	0
1251	50	33.48	42.66	76.14	35.72	78.38	25.94	1.07	3.34	16.57	.96	1	9.37	1.84	1.7	2.96	2.59	1.77	May	1.71	3	1	1	4	-.06	.05	32.82	Inactive	65.4	2.65	0
1252	50	28.2	40.02	68.22	37	77.02	24.89	.86	2.48	16.13	.76	.73	8.77	2	1.85	4.31	2.31	1.23	May	8.51	2	3	1	4	.19	.05	50.04	Unclassified [in work,occ unknown]	47.8	1.37
1253	50	35.9	43.73	79.62	35.25	78.98	25.8	1.03	3.21	16.5	.92	.95	9.29	2.87	2.52	5.08	3.41	1.52	May	-3.09	2	1	1	2	2.54	.05	50.04	Intermediate occupations	31	2.46	0
1254	50	26.95	39.46	66.41	37.28	76.74	24.81	.83	2.4	16.11	.74	.7	8.7	1.94	1.58	2.92	1.59	.49	May	-1.69	5	3	1	4	.19	1.3	48.95	Routine & manual occupations	38	2.27	0
1255	50	32.17	41.92	74.09	36.05	77.97	25.65	1.06	3.11	16.4	.95	.88	9.25	3.11	2.97	5.52	4.39	2.79	May	8.21	2	3	1	4	.41	.1	43.25	Routine & manual occupations	28.8	.88	0
1256	50	38.64	45.6	84.24	34.79	80.39	26.4	1.12	3.74	16.73	1	1.11	9.67	1.19	1.17	1.84	1.34	.87	May	-.59	2	3	1	3	.37	.9	37.97	Routine & manual occupations	28.8	1.24	1
1257	50	27.6	39.59	67.19	37.11	76.7	24.79	.83	2.43	16.06	.74	.71	8.72	2.67	2.25	2.55	2.91	1.41	May	.11	1	3	1	3	.34	.2	32.82	Routine & manual occupations	111	3.23	1
1258	50	23.55	37.79	61.34	38.42	76.22	24.51	.76	2.24	15.93	.68	.65	8.58	1.86	1.49	2.96	1.66	.61	May	-.69	4	3	0	3	.41	.05	33.86	Managerial & professional occupations	23	.64	1
1259	50	30.7	41.67	72.37	36.24	77.91	25.42	.95	2.92	16.33	.85	.84	9.09	2.72	2.2	4.05	2.52	.51	May	4.71	2	3	0	4	.37	.05	60.86	Managerial & professional occupations	84.60001	2.76	0
1260	50	35.45	43.93	79.38	35.36	79.29	25.91	1.02	3.34	16.52	.91	.99	9.38	2.15	1.81	2.89	2.38	.88	May	-.49	1	3	0	4	.37	1	37.97	Intermediate occupations	68.2	2.01	1
1261	50	28.81	40.03	68.85	36.85	76.89	24.86	.85	2.49	16.09	.75	.73	8.77	1.94	1.66	2.49	1.92	1.02	May	2.71	3	3	1	2	.41	.3	27.57	Inactive	52.4	1.53	0
1262	50	30.01	41.51	71.52	36.54	78.05	25.73	.98	3.22	16.38	.88	.89	9.34	3.16	2.76	5.08	3.92	1.42	May	-.89	2	1	0	4	2.97	.1	41.73	Inactive	20.2	.81	0
1263	50	29.13	40.07	69.2	36.77	76.84	24.83	.84	2.46	16.08	.75	.72	8.75	1.98	1.66	3.58	1.98	.78	May	-.99	5	1	1	3	.23	.1	27.57	Routine & manual occupations	51.4	2.31	0
1264	50	27.03	38.91	65.94	37.99	76.9	24.62	.8	2.47	15.89	.72	.72	8.73	3.21	2.6	3.89	3.32	1.18	May	2.01	2	1	1	4	2.87	.7	36.31	Inactive	83.6	3.41	0
1265	50	30.1	41.06	71.16	36.61	77.67	25.11	.9	2.66	16.21	.8	.77	8.9	3.22	2.49	3.95	2.77	.93	May	1.41	3	1	1	4	2.61	.1	50.67	Intermediate occupations	80.2	3.91	0
1266	50	29.86	40.53	70.39	36.6	77.13	25	.88	2.59	16.16	.78	.76	8.84	2.74	2.36	4.55	3.54	1.28	May	-3.19	2	1	1	2	2.25	5.7	27.57	Intermediate occupations	19.4	1.08	1
1267	50	24	36.94	60.93	39.04	75.97	24.06	.7	2.12	15.61	.63	.62	8.45	3.04	2.51	3.62	2.94	1.43	May	1.81	2	1	0	4	1.96	.3	18.46	missing	41.6	2	0
1268	50	27.3	39.54	66.84	37.18	76.72	24.81	.84	2.45	16.07	.75	.72	8.74	1.71	1.5	3.31	1.87	.84	May	-3.79	3	3	1	4	.44	.05	32.82	Managerial & professional occupations	24	.95	0
1269	50	28.62	39.94	68.56	36.89	76.82	24.79	.82	2.43	16.06	.73	.71	8.73	2.87	2.48	5.2	3.12	1.3	May	.31	5	1	0	4	2.32	.05	27.57	Routine & manual occupations	74.8	3.11	0
1270	51	24.33	38.2	62.53	38.12	76.33	24.45	.76	2.25	15.85	.68	.65	8.6	2.21	1.95	4.56	2.53	1.1	October	.81	3	1	0	3	.34	.1	29.21	Routine & manual occupations	33.2	1.1	0
1271	51	24.97	38.58	63.54	38.03	76.61	24.62	.79	2.37	15.94	.7	.69	8.68	1.64	1.49	3.81	1.98	1.06	October	-.69	3	1	1	2	.37	.2	35.67	Routine & manual occupations	49.2	1.59	0
1272	51	27.65	40.39	68.04	37.32	77.72	24.94	.87	2.61	16.07	.77	.76	8.87	1.57	1.47	3	1.88	1.15	October	-6.69	4	2	0	1	.55	.05	33.94	Routine & manual occupations	18	1.53	0
1273	51	23.34	37.54	60.89	38.4	75.94	24.29	.73	2.15	15.77	.65	.63	8.52	1.65	1.38	2.58	1.69	.67	October	-8.19	2	2	0	1	.55	.05	29.21	Inactive	21	1.52	0
1274	51	24.64	38.42	63.06	38.05	76.48	24.51	.77	2.29	15.88	.69	.67	8.63	2.1	1.49	1.64	1.44	.95	October	-.59	3	2	1	2	.52	.05	33.94	Routine & manual occupations	84.8	3.17	0
1275	51	23.87	37.83	61.7	38.12	75.95	24.28	.73	2.2	15.75	.65	.64	8.54	2.54	1.94	3.01	1.66	.84	October	.71	2	1	0	2	.05	.4	30.66	Managerial & professional occupations	74.8	2.98	0
1276	51	22.58	36.28	58.86	39.31	75.59	24.06	.68	2.08	15.63	.61	.6	8.43	1.94	1.64	2.74	1.95	.75	October	-5.09	1	1	1	1	.81	.1	18.4	Inactive	33.4	1.32	0
1277	51	41.02	47.83	88.84	34.57	82.4	26.9	1.26	4.15	16.92	1.13	1.23	9.98	1.95	1.85	4.19	2.8	1.26	October	.01	3	2	0	1	.3	.05	35.81	Inactive	33	1.53	1
1278	51	24.24	38.26	62.51	38.28	76.55	24.57	.78	2.32	15.92	.7	.67	8.65	1.43	1.31	2.95	2	.89	October	-3.19	3	1	1	1	.19	1	34.18	Routine & manual occupations	74.6	3.92	0
1279	51	25.77	39.27	65.04	37.75	77.02	24.69	.8	2.43	15.95	.72	.7	8.74	1.47	1.36	2.69	2.32	.88	October	-5.09	3	1	1	1	.52	.05	42.96	Inactive	35	1.79	0
1280	51	21.97	35.42	57.39	40.12	75.55	23.9	.68	2.1	15.49	.61	.62	8.4	1.24	1.15	2.03	1.38	.7	October	-7.09	3	1	0	1	.37	.05	19.85	Intermediate occupations	33.6	1.91	0
1281	51	26.89	39.88	66.77	37.6	77.48	24.91	.85	2.56	16.08	.76	.75	8.83	2.03	1.78	3.61	2.97	1.03	October	-3.69	3	1	0	1	-.1	.05	35.81	Managerial & professional occupations	46.8	2.01	0
1282	51	25.04	38.66	63.7	37.98	76.64	24.61	.78	2.36	15.93	.7	.69	8.68	1.44	1.39	4.02	2.72	1.18	October	-4.69	3	1	1	1	-.06	.05	33.94	Inactive	35.8	1.72	0
1283	51	24.53	38.32	62.85	38.17	76.49	24.55	.77	2.31	15.91	.69	.67	8.64	1.99	1.77	3.49	2.36	.99	October	.11	3	1	1	2	.7	.3	35.81	Intermediate occupations	42.6	1.54	0
1284	51	23.88	37.76	61.63	38.29	76.05	24.37	.74	2.18	15.82	.66	.64	8.55	2.16	1.88	3.61	2.75	1.07	October	2.11	3	1	1	2	.41	.05	35.67	Managerial & professional occupations	47.2	1.63	0
1285	51	24.19	38.27	62.46	38.2	76.47	24.54	.77	2.29	15.91	.68	.66	8.63	1.91	1.72	3.67	2.53	1.01	October	-1.19	3	1	1	2	.08	.1	57.26	Managerial & professional occupations	53.4	1.9	0
1286	51	24.52	38.34	62.87	38.08	76.42	24.49	.77	2.28	15.87	.68	.66	8.62	1.95	1.49	1.41	.72	.53	October	.51	3	2	0	1	.26	.05	33.94	Routine & manual occupations	27.8	1.4	0
1287	51	18.51	33.29	51.8	41.8	75.09	23.47	.54	1.77	15.3	.48	.5	8.17	1.98	1.76	3.75	2.25	.98	October	4.81	2	2	1	3	.55	.05	8.36	Managerial & professional occupations	84.7	2.36	0
1288	51	44.78	49.41	94.19	33.02	82.43	27.71	1.47	4.64	17.33	1.31	1.32	10.38	1.85	1.74	3.74	3.11	1.77	October	-4.59	2	1	0	2	.66	.05	42.65	Managerial & professional occupations	25.8	1.87	0
1289	51	25.1	38.74	63.84	37.94	76.68	24.58	.79	2.34	15.91	.7	.68	8.67	1.94	1.75	4.36	2.48	1.11	October	-.99	3	1	0	1	.23		33.94	Routine & manual occupations	27.6	1.24	0
1290	51	23.97	37.94	61.91	38.3	76.24	24.46	.76	2.24	15.87	.67	.65	8.59	1.91	1.63	3.06	1.85	.9	October	-4.19	3	1	0	1	.77	.05	35.81	Routine & manual occupations	24.4	1.36	0
1291	51	23.56	37.66	61.22	38.4	76.06	24.37	.74	2.19	15.83	.66	.64	8.55	2.27	1.79	2.12	1.73	1.03	October	4.01	5	2	1	2	.34	.05	24.79	Managerial & professional occupations	79.1	2.22	1
1292	51	27.01	40.05	67.06	37.46	77.51	24.85	.84	2.54	16.03	.75	.74	8.82	1.97	1.7	2.8	2.97	1.09	October	4.81	3	2	0	3	.48	.5	33.94	Routine & manual occupations	75.89999	1.96	0
1293	51	26.75	39.71	66.46	37.61	77.32	24.9	.84	2.57	16.06	.75	.75	8.83	2.43	2.22	5.8	4.07	1.49	October	5.21	2	1	1	1	.15	.05	35.81	Managerial & professional occupations	63.6	1.9	1
1294	51	27.6	40.34	67.94	37.45	77.79	24.96	.88	2.6	16.11	.78	.76	8.85	1.63	1.36	2.77	1.5	.68	October	-6.89	3	2	0	2	.26	.05	34.18	Intermediate occupations	32.4	1.24	0
1295	51	26.17	39.42	65.59	37.79	77.21	24.79	.83	2.47	16.03	.74	.72	8.76	1.75	1.63	3.42	2.38	1.05	October	-8.49	3	1	0	3	.81	.05	34.18	Intermediate occupations	16.2	1.29	0
1296	51	24.19	38.27	62.46	38.2	76.47	24.54	.77	2.29	15.91	.68	.66	8.63	1.59	1.52	4.19	3.32	1.15	October	-7.09	3	1	1	2	.23	.05	57.26	Routine & manual occupations	32.6	1.79	1
1297	51	24.66	38.65	63.32	38.03	76.68	24.51	.76	2.35	15.83	.68	.66	8.68	1.9	1.78	3.51	2.05	1.17	October	1.41	3	2	0	1	.37	.2	31.95	Routine & manual occupations	30	1.51	0
1298	51	24.2	38.11	62.3	38.25	76.35	24.5	.76	2.27	15.89	.68	.66	8.61	1.89	1.72	3.95	2.93	1.24	October	-1.09	5	1	0	1	.77	.2	35.81	Intermediate occupations	60.6	2.77	0
1299	51	28.97	41.17	70.14	37.11	78.28	25.15	.91	2.75	16.19	.82	.8	8.96	1.47	1.47	3.04	2.17	1.42	October	.01	3	1	1	2	-.35	.6	34.18	Routine & manual occupations	58.6	2.53	0
1300	52	23.56	37.34	60.9	38.56	75.9	24.14	.71	2.17	15.65	.63	.62	8.5	2.34	2.17	3.67	3.13	1.63	October	-1.49	3	4	0	1	.12	.05	50.69	Routine & manual occupations	29.6	1.92	0
1301	52	23.84	37.8	61.64	37.99	75.79	24.24	.71	2.13	15.75	.63	.62	8.49	2.14	1.74	2.97	1.73	.85	October	1.61	1	4	0	4	.05	7.5	32.12	Intermediate occupations	49.2	2.59	1
1302	52	23.88	37.5	61.38	38.56	76.07	24.27	.74	2.29	15.69	.66	.66	8.58	2.3	1.86	3.25	1.71	.72	October	4.61	3	4	1	2	.12	.05	35.45	Routine & manual occupations	67	3.62	0
1303	52	22.52	36.79	59.31	38.91	75.7	24.07	.71	2.13	15.61	.63	.61	8.46	1.27	1.26	2.68	2.14	1.11	October	-8.29	1	4	1	1	.26	.05	50.69	Inactive	30.8	.02	1
1304	52	24.87	38.34	63.21	38.17	76.51	24.43	.75	2.39	15.76	.67	.68	8.67	2.55	2.21	3.67	2.58	1.31	October	1.21	1	4	1	3	.15	.05	37.93	Routine & manual occupations	42.2	1.63	1
1305	52	24.22	37.78	62	38.48	76.26	24.35	.75	2.36	15.72	.67	.68	8.63	2.14	1.89	3.89	2.81	1.18	October	-1.69	2	4	0	1	.23	.05	37.93	Intermediate occupations	41.2	2.21	0
1306	52	22.07	36.61	58.68	39.03	75.64	24.05	.7	2.11	15.6	.63	.61	8.45	1.62	1.55	2.8	2.2	1.3	October	-7.29	3	4	0	2	.12	.05	35.45	Routine & manual occupations	27	1.71	0
1307	52	23.76	37.46	61.23	38.58	76.05	24.25	.73	2.27	15.68	.65	.65	8.56	1.99	1.71	2.27	1.89	1.23	October	-1.39	2	4	0	1	.12	.05	35.45	Routine & manual occupations	52.2	2.63	0
1308	52	25.01	38.15	63.16	38.03	76.18	24.24	.7	2.17	15.73	.63	.62	8.52	1.6	1.53	2.69	1.79	1.03	October	-2.29	3	4	0	2	.05	.05	46.62	Routine & manual occupations	37.8	1.71	0
1309	52	24.65	38.09	62.74	38.02	76.11	24.18	.69	2.09	15.72	.62	.6	8.46	1.69	1.54	3.83	2.3	.95	October	.01	2	4	0	3	.23	.05	46.62	Inactive	25.4	.51	0
1310	52	23.23	37.21	60.44	38.64	75.84	24.12	.71	2.15	15.64	.63	.62	8.48	1.54	1.44	2.26	1.94	1.19	October	-3.79	3	4	0	2	.08	.05	50.69	Intermediate occupations	41.6	2.69	0
1311	52	20.96	34.56	55.52	40.75	75.3	23.65	.66	1.94	15.36	.59	.56	8.3	2.19	1.92	3.79	2.7	1.45	October	-3.49	1	4	1	1	.05	.05	11.62	Managerial & professional occupations	79.2	3.13	1
1312	52	24.32	37.7	62.02	38.46	76.16	24.34	.75	2.34	15.72	.67	.68	8.62	1.83	1.55	2.53	1.51	.83	October	-3.89	1	4	1	2	.23	1.2	35.45	Routine & manual occupations	36.8	1.89	0
1313	52	26.35	39.35	65.69	37.77	77.12	24.68	.78	2.6	15.85	.7	.74	8.83	1.5	1.42	2.9	1.63	.97	October	-5.29	3	4	0	3	-.35	.7	37.93	Inactive	19.6	.79	0
1314	52	23.5	37.34	60.84	38.6	75.94	24.16	.71	2.19	15.65	.64	.63	8.51	2.27	2.04	3.72	2.34	1.21	October	-2.99	3	4	0	1	.26	.05	50.69	Managerial & professional occupations	20	.99	0
1315	52	23.76	37.38	61.13	38.45	75.83	24.04	.67	2.03	15.63	.59	.58	8.4	1.95	1.63	3.41	1.89	.86	October	-3.39	1	4	0	1	.08	.8	36.72	Routine & manual occupations	30.4	1.83	1
1316	52	26.87	38.78	65.65	37.65	76.43	24.49	.77	2.36	15.84	.69	.68	8.65	1.79	1.67	3.43	2.63	1.12	October	2.51	3	4	1	1	-.06	.1	38.99	missing	27.4	1.17	1
1317	52	23.31	37.17	60.49	38.66	75.83	24.12	.71	2.15	15.63	.63	.62	8.48	1.31	1.19	3.73	1.99	.76	October	-8.79	2	4	0	1	-.17	1	50.69	Managerial & professional occupations	28	1.85	1
1318	53	24.85	38.22	63.08	38.21	76.44	24.39	.74	2.37	15.74	.66	.68	8.65	1.91	1.74	3.37	2.59	1.12	October	2.21	4	1	1	1	.01	.05	37.93	Routine & manual occupations	104.8	3.87	0
1319	53	25.63	38.61	64.24	37.9	76.51	24.56	.8	2.45	15.84	.71	.71	8.72	1.66	1.56	3.24	2.37	1.1	October	-5.79	1	1	0	2	-.1	14.5	35.45	Routine & manual occupations	33	1.96	1
1320	53	24.17	38.03	62.21	38.23	76.27	24.33	.73	2.28	15.74	.65	.66	8.59	2.41	2	3.17	2.47	1.02	October	-.29	1	1	0	3	-.21	5.3	32.12	Unclassified [in work,occ unknown]	60	2.26	1
1321	53	25.14	38.51	63.65	38.06	76.57	24.4	.75	2.36	15.76	.67	.67	8.64	1.5	1.3	1.39	1.4	.9	October	-3.39	2	1	1	1	-.13	.05	54.63	Intermediate occupations	83.4	3.87	0
1322	53	23.91	38.01	61.91	37.84	75.85	24.32	.72	2.16	15.8	.64	.63	8.52	1.6	1.32	3.12	1.85	.53	October	-1.69	2	1	0	2	-.53		30.66	Unclassified [in work,occ unknown]	62.4	2.7	0
1323	53	23.74	37.45	61.18	38.43	75.88	24.17	.71	2.17	15.68	.63	.63	8.5	3.03	1.57	2.94	.57	2.48	October	1.41	3	1	1	1	-.82	.7	37.93	Inactive	36.2	1.14	0
1324	53	26.4	38.82	65.22	37.69	76.51	24.57	.8	2.45	15.85	.71	.71	8.72	1.8	1.51	1.98	1.98	.79	October	-.29	2	1	1	1	-.03	.1	35.45	Routine & manual occupations	55.2	1.92	0
1325	53	26.25	39.62	65.88	37.55	77.17	24.74	.84	2.46	16	.75	.72	8.75	1.28	1.19	2.83	1.9	.91	October	-1.89	1	1	1	1	-.24	.4	48	Intermediate occupations	32.6	1.31	1
1326	53	24.03	37.82	61.85	38.02	75.84	24.24	.72	2.14	15.74	.64	.62	8.5	1.58	1.26	1.9	1.31	.57	October	-.89	1	1	0	1	-.39	1.6	30.66	Inactive	30.4	1.34	1
1327	53	23.8	37.58	61.38	38.46	76.03	24.21	.72	2.21	15.68	.64	.64	8.53	1.53	1.44	3.38	2.56	1.35	October	-.19	5	1	0	3	-.21	.8	50.69	Intermediate occupations	47.8	2.14	1
1328	53	26.23	38.46	64.7	37.92	76.39	24.53	.79	2.39	15.85	.7	.7	8.68	1.65	1.64	2.68	2.15	1.59	October	-.79	1	1	1	2	.01	.2	38.82	Inactive	50.2	1.66	0
1329	53	23.93	37.51	61.45	38.36	75.87	24.18	.71	2.17	15.68	.63	.63	8.49	1.38	1.24	2.32	1.67	.83	October	-1.29	3	1	1	1	-.39	.6	37.93	Managerial & professional occupations	42.4	1.94	1
1330	53	24.7	38.2	62.9	37.78	75.98	24.4	.74	2.25	15.82	.66	.66	8.58	2.09	1.68	2.6	2.02	.73	October	-3.19	3	1	0	1	-.06	.05	32.12	Intermediate occupations	85.6	3.41	0
1331	53	25.17	38.37	63.54	38.06	76.43	24.37	.74	2.34	15.74	.66	.67	8.63	1.61	1.41	2.9	1.4	.8	October	-4.09	1	1	1	2	-.17	.3	50.69	Intermediate occupations	48	1.76	1
1332	53	26.39	38.21	64.6	37.81	76.02	24.29	.73	2.18	15.77	.65	.63	8.52	1.14	.97	1.71	1.13	.52	October	-5.09	3	1	0	2	-.42	.05	40.94	Intermediate occupations	49.8	2.21	0
1333	53	23.89	37.5	61.39	38.45	75.95	24.2	.71	2.2	15.68	.64	.64	8.52	2.32	2.06	3.67	2.54	1.28	October	4.31	1	1	0	2	-.13	1.3	37.93	Routine & manual occupations	78.8	3.07	1
1334	53	23.41	37.71	61.12	38.13	75.84	24.26	.72	2.15	15.75	.64	.62	8.51	2.27	2.01	2.82	2.44	1.36	October	.91	1	1	0	2	-.03	1.2	30.66	Intermediate occupations	37.4	1.12	1
1335	53	27.44	39.7	67.14	37.17	76.87	24.9	.87	2.56	16.08	.78	.74	8.82	2.04	1.86	3.25	2.01	1.01	October	-2.29	1	1	0	3	.01	.8	45.78	Routine & manual occupations	48.4	1.77	1
1336	53	23.41	37.41	60.82	38.41	75.82	24.16	.7	2.14	15.68	.63	.62	8.48	1.94	1.63	2.8	1.72	.87	October	2.11	3	1	0	1	-.39	.05	37.93	Inactive	31.2	1.34	1
1337	53	22.34	36.76	59.1	39.02	75.78	24.13	.7	2.04	15.71	.62	.6	8.42	2.07	1.93	3.47	2.5	1.33	October	-.79	5	1	0	1	-.32	.05	35.38	Managerial & professional occupations	108.4	4.27	1
1338	53	26.56	38.72	65.28	37.79	76.51	24.57	.78	2.4	15.89	.7	.7	8.68	1.22	1.12	2.33	1.77	.69	October	-6.79	5	1	1	1	-.32	1.7	37.98	Managerial & professional occupations	23.6	1.77	1
1339	53	23.45	37.62	61.06	38.53	76.15	24.23	.73	2.23	15.68	.65	.64	8.54	1.61	1.61	3.93	3.02	1.46	October	1.21	3	1	1	2	-.24	.1	54.63	Routine & manual occupations	64.4	2.44	0
1340	53	24.65	38.18	62.82	38.14	76.31	24.35	.73	2.31	15.74	.65	.66	8.61	1.97	1.82	2.95	2.3	1.37	October	.21	1	1	0	3	-.1	1	37.93	Unclassified [in work,occ unknown]	44.6	1.33	1
1341	53	24.49	38.1	62.58	37.85	75.94	24.21	.68	2.08	15.76	.61	.6	8.45	1.87	1.69	2.75	2.08	1.21	October	-3.79	5	1	0	1	.01	.05	46.62	Intermediate occupations	47.8	2.91	1
1342	53	28.64	39.94	68.58	37.29	77.23	24.97	.84	2.8	15.98	.75	.78	8.99	1.74	1.35	2.08	1.27	.64	October	3.81	5	1	1	1	-.42	2.4	36.72	Inactive	28.8	.91	1
1343	53	23.44	37.34	60.78	38.61	75.94	24.16	.71	2.19	15.65	.63	.63	8.51	1.42	1.41	2.57	2.18	1.59	October	-3.79	1	1	1	1	-.32	.05	50.69	Managerial & professional occupations	32.6	1.25	0
1344	53	27.47	38.91	66.38	37.59	76.5	24.57	.79	2.42	15.88	.7	.71	8.7	2.81	2.24	3.93	2.23	1.02	October	3.71	2	1	0	3	.05	.05	41.53	Inactive	46.8	1.75	0
1345	54	25.56	39.01	64.57	37.63	76.65	24.75	.81	2.39	16.04	.72	.71	8.71	2.19	2.15	4.05	3.71	1.8	November	-2.29	1	1	1	1	-1.98	.1	39.97	Intermediate occupations	19.4	1.29	0
1346	54	24.41	38.28	62.7	38.06	76.34	24.46	.77	2.25	15.86	.68	.66	8.6	2.11	1.93	4.64	2.62	1.17	November	-.59	3	4	0	2	-1.62	.2	30.5	Intermediate occupations	23.4	1.52	0
1347	54	23.68	37.92	61.6	38.18	76.1	24.46	.75	2.19	15.9	.67	.64	8.56	1.71	1.54	3.39	2.33	1.01	November	-6.09	3	4	1	1	-1.36	.163	42.27	Managerial & professional occupations	25.2	2.31	0
1348	54	27.28	38.85	66.13	37.66	76.51	24.58	.79	2.43	15.88	.71	.71	8.7	2.25	1.89	3.49	2.77	.82	November	-.09	3	1	0	1	-2.01	.05	31.91	Routine & manual occupations	23.2	1.46	0
1349	54	23.76	37.92	61.68	38.24	76.16	24.45	.75	2.19	15.88	.67	.63	8.57	1.58	1.47	2.84	2.16	1.04	November	-9.09	3	1	0	1	-2.05	.2	44.34	Inactive	17.4	2.19	0
1350	54	23.65	37.87	61.52	38.24	76.11	24.45	.75	2.18	15.89	.66	.63	8.56	1.86	1.69	3.41	2.39	1.09	November	-1.09	3	4	0	1	-1.36	.4	42.27	Inactive	31.2	2.14	0
1351	54	23.71	37.91	61.62	38.19	76.1	24.46	.75	2.19	15.9	.67	.64	8.57	1.83	1.73	4.05	2.82	1.23	November	-3.59	2	1	0	3	-2.01	.2	42.27	Unclassified [in work,occ unknown]	32.4	2.3	0
1352	54	37.14	46.27	83.4	35.06	81.33	26.35	1.14	3.69	16.68	1.02	1.07	9.67	2.26	2.24	5.04	3.19	1.74	November	6.61	2	4	1	1	-1.44	.3	35.3	Inactive	35.8	2.5	0
1353	54	23.62	37.9	61.52	38.24	76.13	24.45	.75	2.19	15.89	.67	.64	8.57	1.63	1.35	2.69	1.39	.53	November	-2.99	2	1	0	1	-2.16	.4	42.27	Managerial & professional occupations	29.4	1.38	0
1354	54	27	39.96	66.96	37.35	77.31	24.97	.86	2.6	16.12	.77	.76	8.85	2.27	2.1	4.15	2.92	.92	November	-1.89	3	4	0	2	-1.8	1.1	39.5	Inactive	29.6	1.92	1
1355	54	24.59	38.42	63.01	38.04	76.46	24.5	.77	2.29	15.87	.68	.66	8.63	2.01	1.85	2.97	3.06	1.23	November	.61	2	4	1	1	-1.36	.05	30.5	Intermediate occupations	28.4	1.91	0
1356	54	28.69	41.03	69.72	37	78.03	25.3	.92	2.76	16.33	.82	.8	8.96	2.57	1.97	3.84	1.84	.68	November	-.39	2	1	0	1	-2.05	.05	47.82	Routine & manual occupations	56.4	2.94	1
1357	54	25.56	39.01	64.57	37.63	76.65	24.75	.81	2.39	16.04	.72	.71	8.71	2.96	2.58	3.74	2.81	1.81	November	5.61	1	4	0	3	-1.47	.05	39.97	Inactive	60.8	2.17	1
1358	54	33.58	43.46	77.05	35.77	79.23	26.07	1.08	3.45	16.54	.97	.97	9.52	2.01	1.81	3.71	2.62	1.26	November	-1.49	2	4	0	2	-1.36	2.4	40.98	Routine & manual occupations	19.2	2.16	1
1359	54	23.71	37.89	61.6	38.25	76.14	24.45	.74	2.19	15.88	.66	.63	8.57	2.32	2.06	4.23	3.17	1.45	November	4.01	2	4	0	3	-1.33	.05	44.34	Managerial & professional occupations	58.2	3.35	1
1360	54	23.75	37.9	61.65	38.24	76.14	24.45	.75	2.19	15.89	.67	.63	8.57	2.15	1.93	4.64	2.39	1.09	November	1.91	5	4	1	3	-1.4	.3	44.34	Routine & manual occupations	38.2	2.74	1
1361	54	26.28	39.39	65.67	37.49	76.88	24.94	.84	2.56	16.12	.75	.76	8.82	2.13	2.03	3.98	3.53	1.51	November	-2.89	5	1	1	1	-2.2	5.3	34.4	Inactive	48.8	3.56	1
1362	54	23.68	37.89	61.57	38.24	76.13	24.45	.74	2.19	15.88	.66	.63	8.57	1.61	1.25	2.62	1.25	.4	November	-7.19	2	1	0	3	-2.12	.05	44.34	Inactive	31.6	3.94
1363	54	26.15	39.31	65.46	37.48	76.79	24.82	.82	2.44	16.08	.73	.72	8.74	1.74	1.48	1.89	1.54	1.07	November	-7.39	4	4	0	1	-1.69	1.3	34.4	Routine & manual occupations	17.4	2.39	0
1364	54	27.34	39.63	66.97	37.16	76.79	24.84	.85	2.51	16.06	.76	.72	8.78	2.03	1.75	3.35	2.05	.8	November	.51	5	1	0	2	-2.01	1	52.96	Inactive	92.8	3.5	1
1365	54	26.35	39.67	66.03	37.47	77.15	24.97	.85	2.57	16.14	.76	.75	8.83	1.96	1.91	5	3.34	1.62	November	-2.19	2	4	1	1	-1.62	.05	52.91	Inactive	18.2	1.74	0
1366	54	23.78	37.91	61.69	38.23	76.14	24.36	.75	2.21	15.8	.67	.64	8.56	2.49	2.32	5.29	2.81	1.72	November	-1.99	1	1	1	3	-2.05	.05	30.5	Intermediate occupations	40.6	1.79	1
1367	54	25.14	38.76	63.9	37.74	76.5	24.68	.79	2.34	16.01	.71	.69	8.67	1.71	1.63	4.64	2.42	1.14	November	.01	4	4	1	2	-1.54	.05	34.4	Intermediate occupations	31.2	1.8	0
1368	54	25.09	38.76	63.85	37.9	76.65	24.59	.79	2.34	15.92	.7	.68	8.67	2.54	2.16	4.25	2.63	1	November	4.61	3	4	1	3	-1.51	3.6	42.96	Inactive	30.6	2.42	0
1369	54	23.77	36.81	60.58	38.98	75.8	24.03	.69	2.06	15.6	.62	.6	8.42	1.95	1.7	4.01	2.1	.88	November	.51	5	1	0	1	-2.38	.5	23.49	Routine & manual occupations	21.4	2.85	1
1370	54	25.06	38.73	63.79	37.78	76.52	24.71	.8	2.37	16.02	.71	.7	8.69	1.43	1.4	3.58	2.75	1.42	November	-2.79	3	4	1	3	-1.91	.05	34.4	Intermediate occupations	26.4	1.84	0
1371	54	24.3	38.29	62.59	37.98	76.26	24.56	.77	2.25	15.95	.68	.66	8.61	1.4	1.4	2.95	2.55	1.4	November	-5.89	3	1	1	1	-2.09	.433	34.4	Inactive	28.8	1.48	1
1372	55	24.73	37.53	62.26	38.27	75.81	24.18	.72	2.14	15.7	.64	.62	8.48	1.75	1.72	3.64	2.6	1.58	November	-4.29	1	4	1	1	-1.26	6.4	44.31	Intermediate occupations	29	1.59	1
1373	55	24.99	37.86	62.85	38.22	76.08	24.35	.76	2.27	15.76	.67	.66	8.59	2.06	1.9	4.12	3.06	1.32	November	1.51	2	4	1	1	-1.29	.05	41.53	Routine & manual occupations	40.2	4.31	0
1374	55	24.97	38.74	63.71	38.16	76.9	24.61	.78	2.37	15.92	.7	.68	8.69	1.76	1.72	3.43	2.64	1.37	November	-6.09	3	2	1	2	-.68	.4	30.69	Inactive	77.4	3.67	0
1375	55	25.03	37.88	62.91	38.16	76.05	24.33	.74	2.22	15.78	.66	.64	8.55	1.78	1.72	3.96	3.23	1.51	November	-3.69	3	4	1	1	-1.4		37.38	Routine & manual occupations	50.8	3.09	1
1376	55	24.76	38.51	63.27	38.22	76.73	24.58	.78	2.35	15.91	.7	.68	8.67	1.57	1.51	2.77	2.74	1.18	November	-3.99	3	4	1	1	-1.22	.9	30.69	Managerial & professional occupations	49.8	2.04	0
1377	55	23.69	37.68	61.37	38.52	76.2	24.4	.75	2.24	15.82	.67	.65	8.58	1.99	1.75	4.43	2.47	1.02	November	.01	2	4	1	1	-1.07		24.28	Routine & manual occupations	41.6	2.87
1378	55	25.74	38.04	63.78	38.04	76.08	24.39	.75	2.25	15.8	.67	.65	8.58	2.49	1.9	2.74	2.32	.85	November	5.71	3	2	1	3	-.53	.05	24.28	Unclassified [in work,occ unknown]	105.2	4.42	1
1379	55	25.73	37.99	63.72	37.98	75.97	24.26	.73	2.18	15.75	.65	.63	8.52	2.79	2.18	2.77	2.18	1.25	November	4.11	5	2	1	2	-.53	.6	40.94	Managerial & professional occupations	105.2	3.65
1380	55	24.94	38.43	63.36	37.66	76.09	24.52	.75	2.26	15.93	.67	.66	8.58	1.77	1.51	2.25	1.55	.58	November	-.49	2	2	1	3	-.35	3.5	25.95	Routine & manual occupations	39	1.6	1
1381	55	26.65	38.59	65.24	37.81	76.4	24.53	.79	2.42	15.84	.7	.7	8.69	1.8	1.45	2.54	1.49	.64	November	-3.89	4	4	0	1	-1.44	.05	41.53	Routine & manual occupations	26.8	1.38	0
1382	55	26.78	38.53	65.32	37.73	76.27	24.45	.76	2.31	15.83	.68	.67	8.62	2.02	1.77	3.87	2.45	.93	November	-1.89	2	4	0	1	-1.11	.2	41.53	Intermediate occupations	22	1.06	0
1383	55	25.93	39.34	65.28	37.87	77.22	24.79	.83	2.48	16.02	.74	.72	8.77	1.84	1.7	3.15	2	1.18	November	-1.79	3	4	0	2	-1.29	.05	34.18	Intermediate occupations	34.2	2.01	0
1384	55	23.69	37.81	61.5	38.32	76.13	24.38	.76	2.25	15.79	.68	.65	8.59	2.16	1.98	3.85	3.2	1.24	November	2.21	4	2	0	1	-.28	.2	31.95	Routine & manual occupations	42.6	2.46	0
1385	55	28.12	39.76	67.88	37.43	77.19	24.8	.83	2.5	16.02	.74	.73	8.78	1.74	1.54	2.59	2.54	.97	November	-.99	3	2	0	3	-.32	.05	39.04	Routine & manual occupations	35.2	1.36	0
1386	55	27.49	39.13	66.61	37.59	76.72	24.67	.81	2.48	15.92	.72	.72	8.74	2.33	1.97	3.26	2.05	1.05	November	5.01	3	4	1	1	-1.15	.05	31.91	Intermediate occupations	40.2	1.46	0
1387	55	26.29	38.88	65.17	37.6	76.48	24.33	.72	2.2	15.78	.64	.63	8.54	2.16	1.83	3.18	2.03	1.01	November	-1.39	5	4	1	1	-1.07	.4	46.62	Managerial & professional occupations	109.6	4.52	1
1388	55	26.65	38.59	65.23	37.81	76.4	24.53	.79	2.42	15.84	.7	.7	8.69	2.01	1.81	3.44	3.04	1.22	November	-1.29	3	4	1	1	-1.18	.05	41.53	Routine & manual occupations	51	2	0
1389	55	19.21	33.55	52.76	41.2	74.75	23.43	.57	1.76	15.27	.51	.51	8.16	1.76	1.27	1.64	1.2	.48	November	-1.99	4	2	0	2	-.28	.05	27.68	Managerial & professional occupations	86.8	3.59	0
1390	55	24.72	37.79	62.51	38.24	76.03	24.32	.74	2.22	15.77	.66	.64	8.55	1.97	1.85	4.54	3.86	2	November	-.59	3	4	1	3	-1.07	.05	37.38	Routine & manual occupations	45.8	1.87	0
1391	55	26.08	38.27	64.35	37.99	76.26	24.49	.8	2.4	15.82	.71	.69	8.67	1.66	1.56	4.85	2.61	1.09	November	-3.59	1	4	1	3	-1.04	.1	44.31	Routine & manual occupations	38.6	1.91	1
1392	55	29.79	39.84	69.63	37.12	76.96	24.99	.89	2.75	16.07	.79	.82	8.93	2.17	2.1	4.98	3.22	1.94	November	6.01	3	4	1	2	-1.47	.05	38.82	Managerial & professional occupations	82.2	3.2	1
1393	55	25.35	37.84	63.19	38.08	75.92	24.24	.72	2.16	15.74	.64	.62	8.5	2.24	1.91	3.48	2.1	1.12	November	.01	1	2	0	3	-.24	.05	40.94	Managerial & professional occupations	22.2	1.36	1
1394	55	26.32	39.47	65.79	37.81	77.28	24.91	.84	2.64	16.03	.75	.77	8.87	1.95	1.46	1.68	1.36	1.01	November	2.01	2	2	1	3	-.28	.2	37.98	Inactive	82.6	2.68	0
1395	55	26.42	38.34	64.76	37.86	76.2	24.42	.77	2.32	15.79	.69	.67	8.62	1.89	1.77	4.27	2.76	1.1	November	-3.49	2	4	1	2	-1.18	.05	41.53	Inactive	24.6	1.03
1396	55	25.31	38.85	64.16	38.06	76.91	24.72	.81	2.48	15.96	.72	.72	8.76	1.52	1.41	2.87	2.06	.98	November	-4.59	3	4	1	2	-1.07	.3	37.98	Routine & manual occupations	36	1.82	0
1397	55	26.56	38.31	64.88	37.85	76.17	24.43	.76	2.29	15.82	.68	.66	8.61	1.38	1.28	3.02	2.23	.88	November	-5.09	2	4	1	1	-1.18	.05	24.28	Intermediate occupations	72	3.51	1
1398	55	26.77	39.28	66.05	37.33	76.61	24.7	.81	2.36	16.02	.72	.69	8.68	2.23	2.09	4.33	2.66	1.39	November	6.21	5	4	0	1	-1.36	1.1	27.57	Inactive	114.2	5.28	0
1399	55	25.05	37.88	62.93	38.2	76.07	24.37	.75	2.23	15.8	.67	.65	8.57	2.04	1.71	3.78	1.96	.87	November	-2.29	3	4	0	3	-1.29	.05	24.28	Inactive	29.4	1.65	0
1400	55	26.62	38.75	65.37	37.78	76.53	24.58	.79	2.41	15.89	.7	.7	8.69	1.97	1.61	2.04	1.7	.59	November	2.11	5	2	1	2	-.5	1.4	41.53	Routine & manual occupations	98	5.28	1
1401	55	24.51	37.68	62.19	38.34	76.03	24.32	.75	2.26	15.75	.67	.65	8.58	1.7	1.35	1.56	1.6	.73	November	-4.49	3	2	0	1	-.28	.9	41.53	Unclassified [in work,occ unknown]	35	1.25	1
1402	55	28.47	39.43	67.9	37.33	76.76	24.68	.8	2.48	15.94	.72	.72	8.74	2.07	1.58	2.09	1.59	.64	November	-.89	3	2	1	1	-.6	.05	41.53	Managerial & professional occupations	27	1.47	0
1403	55	27.64	39.16	66.8	37.65	76.81	24.88	.9	2.72	15.98	.8	.78	8.91	2.09	1.68	2.55	1.65	.81	November	-.59	3	4	0	2	-1.22	.1	44.31	Inactive	51.2	2.35	0
1404	55	25.74	39.26	65	37.97	77.23	24.71	.81	2.44	15.97	.72	.7	8.74	1.76	1.34	2.8	1.57	.26	November	-3.29	3	2	1	3	-.32	.05	30.69	Routine & manual occupations	23.8	1.86	1
1405	55	26.46	38.5	64.96	37.81	76.31	24.47	.76	2.32	15.85	.68	.68	8.63	2.56	2.19	3.98	2.71	1.24	November	3.21	5	4	1	1	-1.07	1.1	41.53	Managerial & professional occupations	99.6	4.95	0
1406	55	27.99	39.47	67.46	37.45	76.92	24.77	.82	2.56	15.97	.74	.75	8.8	2	1.71	2.64	1.78	1.37	November	-3.99	5	2	0	2	-.79	.2	41.53	Unclassified [in work,occ unknown]	20	1.34	0
1407	55	25.18	38.08	63.26	38.19	76.27	24.46	.78	2.38	15.8	.7	.69	8.66	1.33	.9	.66	.82	.39	November	-7.89	3	2	1	1	-.28	.05	41.53	Managerial & professional occupations	30.2	2.48	1
1408	55	23.88	37.68	61.55	38.77	76.45	24.38	.76	2.24	15.81	.68	.65	8.57	1.88	1.51	3.41	1.63	.65	November	-1.49	3	4	0	1	-1.15	.05	39.08	Inactive	56.8	2.88	0
1409	55	25.68	38.1	63.78	38.04	76.14	24.39	.76	2.29	15.78	.68	.66	8.6	2.06	1.9	4.32	2.39	1.22	November	1.81	1	4	1	1	-1.07	.4	41.53	missing	38.4	1.35
1410	55	30.05	40.19	70.24	36.78	76.97	24.74	.82	2.53	15.93	.73	.71	8.81	1.76	1.54	2.9	2.33	.98	November	-5.09	3	2	0	3	-.53	.05	32.97	Routine & manual occupations	50.8	2.95	0
1411	55	27.38	38.96	66.34	37.62	76.58	24.61	.8	2.44	15.9	.71	.71	8.72	2.83	1.98	2.59	1.7	.83	November	2.81	3	2	0	1	-.32	.4	31.91	Inactive	56.4	3.16	0
1412	55	25.34	37.92	63.25	38.13	76.05	24.37	.75	2.23	15.8	.67	.65	8.57	1.73	1.63	3.16	1.97	1.13	November	-3.29	4	4	0	1	-1.07	.8	28.6	Routine & manual occupations	40	2.22	0
1413	55	26.95	38.42	65.37	37.7	76.12	24.36	.75	2.24	15.8	.67	.65	8.57	1.62	1.57	4.21	2.23	1.14	November	-3.49	3	4	1	1	-1.15	.05	37.38	Routine & manual occupations	47.4	2	0
1414	55	25.2	37.78	62.99	38.12	75.9	24.23	.72	2.15	15.73	.64	.62	8.5	1.88	1.66	3.24	1.9	.71	November	.71	3	2	0	3	-.28	.05	40.94	Inactive	31.8	2	0
1415	55	24.83	37.57	62.4	38.24	75.8	24.18	.72	2.13	15.7	.64	.62	8.48	1.9	1.48	2.01	1.5	.69	November	-5.09	3	2	1	1	-.71	.05	40.94	Routine & manual occupations	57.5	2.92	0
1416	56	29.89	41.97	71.86	36.62	78.59	25.51	.94	3.02	16.34	.84	.88	9.17	1.98	1.7	3.43	2.21	.86	February	-.49	3	1	0	3	-.6	1.5	52.91	Managerial & professional occupations	75.6	3.33	0
1417	56	26.63	39.38	66.01	37.39	76.77	24.86	.85	2.51	16.07	.76	.72	8.79	2.37	1.89	3.13	2.25	.64	February	2.11	1	1	0	2	-.86	7.7	43.25	Intermediate occupations	104	4.69	1
1418	56	66.04	60.06	126.11	30.11	90.18	30.02	1.92	6.63	18.21	1.72	1.94	11.81	1.87	1.44	1.96	1.55	.79	February	1.41	2	2	1	4	.48	.05	43.25	Unclassified [in work,occ unknown]	26.6	1.11	0
1419	56	28.71	40.85	69.56	36.93	77.79	25.17	.92	2.8	16.17	.82	.81	8.99	2.23	1.96	3.06	2.8	1.92	February	-1.89	3	2	0	1	-.13	.2	48	Managerial & professional occupations	88.2	3.57
1420	56	28.65	40.25	68.9	36.76	77.02	25.11	.91	2.68	16.2	.81	.77	8.91	2.31	1.73	2.74	1.61	.64	February	-.89	2	2	0	3	-.39	.05	58.13	Managerial & professional occupations	19.2	1.35	0
1421	56	28.94	40.44	69.38	36.84	77.28	25.05	.9	2.67	16.14	.8	.77	8.91	2.29	1.94	2.51	2.17	1.32	February	.31	1	2	1	4	-.1	.05	43.25	Intermediate occupations	28.6	1.29	1
1422	56	26.97	39.25	66.22	37.17	76.42	24.68	.78	2.36	16.03	.7	.68	8.65	2.59	2.11	4.23	2.24	.92	February	3.81	5	1	1	1	-.79	4.3	49.58	Routine & manual occupations	56.2	1.86	1
1423	56	40.17	47.72	87.89	34.37	82.09	26.46	1.18	3.71	16.75	1.05	1.04	9.72	2	1.85	4.2	3	1.44	February	-3.79	2	1	1	3	-.6	.05	50.67	Intermediate occupations	21	1.33	1
1424	56	27.31	40.33	67.64	37.29	77.62	24.85	.87	2.53	16.06	.77	.74	8.8	2.12	1.96	2.39	2.78	1.64	February	-4.99	3	2	1	2	-.03	.8	48	Managerial & professional occupations	26.2	1.78	0
1425	56	26.51	39.39	65.9	37.43	76.82	24.84	.85	2.51	16.06	.76	.73	8.79	1.63	1.35	3.44	1.57	.56	February	-1.79	3	1	1	3	-.6	.3	43.25	Inactive	54.6	2.64	0
1426	56	25.87	39.21	65.08	37.61	76.81	24.78	.84	2.46	16.03	.75	.71	8.75	3.1	2.33	3.91	2.17	.86	February	8.61	1	1	0	2	-.79	1	48	Unclassified [in work,occ unknown]	97.2	3.72	1
1427	56	25.57	39.17	64.74	37.68	76.86	24.76	.82	2.43	16.04	.73	.71	8.73	1.7	1.54	4.05	2.28	1.01	February	-2.79	1	1	1	3	-.86	2.2	35.3	Routine & manual occupations	40.4	2.17	1
1428	56	26.14	39.21	65.36	37.52	76.73	24.81	.84	2.48	16.05	.75	.72	8.76	1.87	1.67	3.07	2.53	1.07	February	-3.89	5	1	0	4	-.75	.05	43.25	Intermediate occupations	25.8	1.35	0
1429	56	25.46	39.02	64.48	37.61	76.63	24.77	.82	2.42	16.06	.73	.7	8.72	1.95	1.8	3.86	3.11	1.18	February	1.21	1	1	1	3	-.86	2.2	46.07	Routine & manual occupations	31.8	1.08	0
1430	56	29.85	40.72	70.57	36.61	77.34	25.14	.93	2.73	16.19	.83	.79	8.95	2.08	1.8	3.29	1.85	.91	February	.21	5	1	1	4	-.79	.2	43.25	Intermediate occupations	27.2	1.1	0
1431	56	25.85	39.15	65	37.61	76.75	24.78	.84	2.46	16.03	.75	.71	8.75	2.39	2.14	4.36	3.05	1.28	February	2.91	1	1	1	3	-.86	.2	48	Routine & manual occupations	32	1.91	1
1432	56	25.14	38.89	64.03	37.72	76.61	24.8	.82	2.44	16.06	.73	.71	8.74	1.17	1.09	1.43	1.2	.88	February	3.71	1	1	1	3	-.82	7.9	41.73	Routine & manual occupations	102.6	3.84	1
1433	56	27.9	40.5	68.41	37.12	77.62	25.04	.89	2.68	16.13	.8	.78	8.91	2.13	1.79	3.35	2.14	1.09	February	3.71	1	1	0	2	-.79	.7	48	Intermediate occupations	33.8	1.09	1
1434	56	29.81	40.79	70.61	36.62	77.42	25.16	.93	2.75	16.19	.83	.79	8.97	1.63	1.55	2.32	2.22	1.45	February	-3.49	3	2	1	4	-.17	.05	43.25	Routine & manual occupations	25.2	1.86	0
1435	56	28.26	39.89	68.16	36.91	76.81	24.84	.81	2.49	16.09	.72	.73	8.74	1.89	1.47	2.56	1.34	.65	February	-2.79	2	1	0	3	-.68	.05	49.58	Routine & manual occupations	22	1.44	1
1436	56	30.9	42.05	72.95	36.4	78.45	25.45	.98	3.02	16.29	.88	.88	9.15	1.99	1.77	2.55	2.15	1.49	February	1.11	3	1	0	3	-.5	.05	48	Inactive	61.8	2.87	1
1437	56	33.8	42.69	76.49	35.68	78.37	25.86	1.12	3.26	16.49	1	.92	9.37	2.49	2.16	4.62	2.83	1.1	February	-.09	5	1	0	3	-.79	.05	43.25	Routine & manual occupations	67.4	4.11	1
1438	56	27.14	40.22	67.37	37.33	77.55	24.84	.86	2.52	16.05	.77	.73	8.79	1.7	1.44	3.33	2.49	1.06	February	.11	1	1	1	1	-.97	.5	48	Intermediate occupations	38	1.25	1
1439	56	28.08	40.43	68.5	37.07	77.5	25.06	.9	2.7	16.14	.8	.78	8.92	2.39	2.07	2.65	2.6	1.52	February	-7.39	3	2	1	3	.23	.2	43.25	Intermediate occupations	24	1.7	0
1440	56	27.89	39.4	67.3	37.06	76.46	24.65	.79	2.35	16	.7	.68	8.65	2.39	2.17	3.16	2.31	1.62	February	-1.09	2	2	1	3	.37	.05	40.16	Managerial & professional occupations	21.4	.99	0
1441	56	29.2	40.5	69.7	36.77	77.27	25.1	.92	2.7	16.17	.82	.78	8.93	3.15	2.65	5.1	3.61	2	February	3.51	5	1	0	4	-.79	.7	43.25	Intermediate occupations	57.6	3.27	0
1442	56	28.06	40.8	68.86	37.1	77.9	24.96	.89	2.61	16.1	.79	.76	8.86	1.96	1.73	3.27	2.02	.97	February	-7.19	2	2	0	3	-.03	.05	48	Intermediate occupations	55.6	2.65	0
1443	56	29.08	40.41	69.5	36.76	77.17	25.15	.92	2.73	16.2	.82	.78	8.95	1.73	1.57	2.93	2.74	1.12	February	-1.69	2	2	1	2	-.46	2.6	43.25	Inactive	88.4	2.69	0
1444	56	26.57	39.73	66.3	37.4	77.13	24.93	.85	2.54	16.12	.76	.74	8.81	1.71	1.52	3.33	2.52	.98	February	1.21	2	2	1	2	-.1	.05	42.06	Intermediate occupations	65.2	2.83	0
1445	56	37.11	43.82	80.93	35.04	78.85	26.33	1.23	3.67	16.67	1.1	1.05	9.66	2.11	1.68	2.48	1.91	.89	February	3.61	2	2	1	4	-.28	.05	55.02	Managerial & professional occupations	28.4	1.61	0
1446	56	24.33	38.17	62.5	38.28	76.45	24.62	.78	2.36	15.91	.69	.67	8.7	2.06	1.72	2.69	2.24	1.04	February	.21	2	2	0	2	.26	.05	40.41	Routine & manual occupations	64.2	2.02	0
1447	56	42.25	46.4	88.64	33.89	80.29	27.16	1.46	4.22	17.04	1.3	1.17	10.12	2.11	1.64	3.33	1.71	.56	February	-.89	3	1	0	3	-.6	.8	43.25	Routine & manual occupations	56.8	2.38	1
1448	56	64.13	59.11	123.24	30.44	89.55	29.81	1.84	6.5	18.1	1.64	1.9	11.71	1.79	1.62	3.73	2.67	1.09	February	-3.49	3	1	0	4	-1.07	1.2	48	Inactive	36.4	1.65	0
1449	56	25.19	38.94	64.12	37.78	76.72	24.69	.8	2.38	16	.72	.69	8.69	2.44	1.96	2.69	2.29	1.12	February	2.21	2	2	0	1	-.21	.05	48	Intermediate occupations	27.6	1.43	0
1450	56	29.08	40.28	69.36	36.77	77.05	25.04	.9	2.64	16.15	.8	.76	8.89	2.25	2.05	2.69	2.7	1.62	February	-3.29	1	2	0	2	.48	.5	43.25	Routine & manual occupations	33	1.33	1
1451	57	32.79	41.77	74.56	36.09	77.87	25.6	1.07	3.17	16.31	.95	.9	9.29	2.03	1.75	3.09	2.48	.96	March	-3.19	2	4	1	2	-.21	.05	44.89	Intermediate occupations	27.6	2.34	0
1452	57	32.94	42.75	75.7	36.09	78.84	25.84	1	3.48	16.32	.89	.97	9.52	2.19	1.96	4.59	2.75	1.15	March	-3.29	3	4	0	4	-.06	.1	26.21	Routine & manual occupations	21	1.22	0
1453	57	23	37.28	60.27	38.66	75.94	24.15	.71	2.16	15.65	.64	.62	8.5	1.85	1.69	2.72	2.38	1.18	March	9.81	2	4	1	3	.26	.05	54.63	Managerial & professional occupations	44.4	1.38	0
1454	57	28.23	39.75	67.98	37.2	76.95	24.96	.9	2.72	16.03	.8	.78	8.93	2.65	2.33	2.86	2.68	1.63	March	1.41	1	4	1	2	.37	.05	26.8	Intermediate occupations	41.4	2.05	0
1455	57	25.89	38.76	64.65	37.77	76.53	24.62	.81	2.48	15.87	.72	.71	8.75	1.45	1.45	2.46	2.68	2.11	March	.91	2	4	1	1	.26	.05	26.8	Routine & manual occupations	67.4	2.97	0
1456	57	26.7	38.78	65.48	37.64	76.42	24.53	.79	2.38	15.85	.71	.69	8.68	2.13	1.76	4.04	2.1	.78	March	-1.99	2	4	0	2	.12	.2	38.99	Routine & manual occupations	20	1.5	0
1457	57	26.4	39.01	65.42	37.58	76.6	24.68	.82	2.51	15.9	.73	.72	8.77	3.03	2.2	3.58	1.9	.7	March	6.61	1	4	0	3	.01	2.3	26.8	Managerial & professional occupations	87.6	2.81	1
1458	57	22.83	37.15	59.99	38.73	75.88	24.14	.71	2.16	15.65	.64	.62	8.49	1.95	1.69	3.08	2.02	.99	March	.31	5	4	1	3	.19	.1	35.45	Managerial & professional occupations	81.4	3.47	1
1459	57	25.7	38.75	64.46	37.83	76.58	24.62	.81	2.49	15.86	.72	.71	8.75	2.2	1.77	3.4	2.13	.55	March	-1.89	2	4	0	2	.41	.05	35.45	Managerial & professional occupations	17.8	1.15	1
1460	57	19.14	33.55	52.69	41	74.54	23.25	.55	1.64	15.19	.49	.47	8.06	1.91	1.76	3.07	2.13	1	March	.71	2	4	0	1	.3	.2	21.33	missing	23.2	1.42
1461	57	22.76	37.03	59.79	38.76	75.79	24.09	.7	2.13	15.63	.63	.61	8.46	2.16	2.01	4.25	2.81	1.45	March	3.91	1	4	0	4	.37	.3	54.63	Inactive	30.4	1.41	1
1462	57	29.35	39.96	69.31	36.95	76.91	24.9	.89	2.65	16.02	.79	.76	8.89	1.79	1.6	3.05	2.36	1.03	March	-6.49	5	4	0	1	.44	.05	32.97	Managerial & professional occupations	22.4	1.55
1463	57	26.65	39.39	66.05	37.38	76.78	24.85	.85	2.51	16.07	.76	.72	8.79	1.69	1.59	3.24	2.62	1.25	March	4.71	3	4	1	4	.41	.2	43.25	Inactive	97	4.43	1
1464	57	29.34	40.29	69.64	36.93	77.22	25.15	.95	2.86	16.11	.85	.82	9.04	1.87	1.71	2.72	2.48	1.21	March	-2.79	3	4	1	2	.41	.6	26.8	Inactive	31	1.66	0
1465	58	26.66	39.25	65.91	37	76.25	24.64	.74	2.25	16.07	.66	.65	8.57	2.14	2.13	3.94	3.79	2.3	May	3.01	3	4	1	2	-.17	.05	56.67	Inactive	39.4	1.35	0
1466	58	28.5	40.47	68.97	36.96	77.43	25.06	.87	2.6	16.21	.77	.76	8.85	3.8	2.86	3.94	2.72	1.2	May	8.91	2	2	1	4	-.13	.05	48.95	Managerial & professional occupations	31.2	1.44	0
1467	58	29.8	40.39	70.19	36.6	76.99	24.85	.83	2.47	16.09	.74	.72	8.76	2.43	1.99	3.53	2.4	.87	May	1.01	1	2	1	3	-.79	.05	27.57	Managerial & professional occupations	71.8	2.92	1
1468	58	24.99	38.69	63.68	37.82	76.51	24.68	.8	2.35	16	.71	.69	8.68	1.53	1.53	3.16	3.24	1.97	May	-3.99	3	4	1	2	-.06	5	42.58	Inactive	23	1.14	0
1469	58	29.45	40.4	69.84	36.68	77.08	24.9	.84	2.51	16.11	.75	.74	8.79	2.76	2.31	4.49	2.94	1.05	May	3.41	3	4	0	4	-.24	.4	27.57	Inactive	85.2	3.52	0
1470	58	24.92	37.63	62.55	38.47	76.09	24.37	.76	2.25	15.78	.68	.65	8.59	1.85	1.73	2.76	2.79	1.37	May	-1.99	1	2	0	2	-.1	.05	37.32	Routine & manual occupations	23.4	1.39	0
1471	58	25.43	38.89	64.32	37.7	76.59	24.69	.8	2.36	16	.71	.69	8.68	2.04	1.62	3.02	1.65	.62	May	-.49	3	4	0	2	-.68	.05	39.97	Inactive	77.2	4.02	0
1472	58	25.31	38.9	64.21	37.72	76.62	24.7	.8	2.37	16.01	.71	.69	8.69	1.65	1.3	2.13	1.36	.56	May	-1.79	2	4	1	4	-.06	.05	39.97	Intermediate occupations	65	2.72	0
1473	58	29.96	40.34	70.3	36.58	76.93	24.83	.82	2.45	16.08	.73	.72	8.74	1.35	1.23	3.08	2.02	.8	May	-3.59	3	4	1	2	-.46	.05	37.97	Routine & manual occupations	23	1.31	0
1474	58	26.07	39.88	65.95	37.72	77.6	24.78	.78	2.49	15.95	.7	.69	8.82	2.07	1.85	3.62	2.25	1.12	May	5.41	2	2	1	4	-.68	.2	47.35	Managerial & professional occupations	47.6	1.73	0
1475	58	25.51	37.87	63.38	38.26	76.12	24.35	.75	2.22	15.78	.67	.64	8.57	2.51	2.17	5.32	2.91	1.02	May	6.41	2	2	1	4	-.21	.1	40.25	Intermediate occupations	47	2.23	0
1476	58	28.18	39.91	68.1	37	76.91	24.85	.84	2.44	16.12	.75	.71	8.73	2.98	2.52	4.65	2.78	1.4	May	12.91	2	4	0	4	-.13	.3	48.95	Managerial & professional occupations	99.6	2.92	0
1477	58	33.47	41.53	75	36.49	78.03	25.7	1.09	3.3	16.3	.97	.92	9.4	1.69	1.69	3.94	2.78	1.97	May	4.41	5	2	0	4	-.21	.3	22.38	Routine & manual occupations	36.2	1.72	0
1478	58	24.54	38.34	62.88	38.16	76.49	24.62	.78	2.31	15.98	.7	.68	8.64	2.94	1.98	2.73	1.23	.68	May	1.21	2	2	0	3	-.6	.2	33.54	Managerial & professional occupations	51.4	2.43	1
1479	58	24.85	38.57	63.41	37.87	76.44	24.63	.79	2.31	15.98	.7	.68	8.65	1.48	1.31	2.24	2.14	.82	May	-3.39	3	2	1	4	-.64	1.7	34.27	Inactive	30.6	2.02	1
1480	58	24.76	38.55	63.31	37.89	76.44	24.64	.79	2.32	15.98	.7	.68	8.66	1.86	1.51	2.7	1.53	.69	May	-2.09	1	4	0	4	-.06	1.9	42.58	Routine & manual occupations	19.4	1.23	1
1481	58	27.91	39.78	67.69	37.1	76.89	24.83	.82	2.46	16.07	.73	.72	8.75	1.95	1.9	3.2	3.12	1.43	May	-2.79	3	2	0	4	-.13	.1	37.97	Routine & manual occupations	24.8	1.56	0
1482	58	24.73	38.54	63.27	37.91	76.45	24.66	.79	2.33	15.99	.7	.68	8.67	1.69	1.52	3.57	2.38	.94	May	.11	3	4	0	4	-.79		34.27	Inactive	35.2	1.44	0
1483	58	24.04	37.95	62	38.26	76.21	24.49	.76	2.23	15.91	.68	.65	8.59	2.22	2.12	2.89	2.4	1.91	May	.91	1	4	0	4	-.53	.1	37.17	Routine & manual occupations	32.4	1.42	1
1484	58	25.16	38.62	63.79	37.82	76.44	24.66	.79	2.33	15.99	.7	.68	8.67	1.85	1.67	3.48	2.59	.96	May	-2.29	3	4	0	2	-.42	2.7	33.62	Unclassified [in work,occ unknown]	28.2	1.61
1485	58	29.42	40.57	69.98	36.7	77.27	24.97	.85	2.58	16.14	.76	.76	8.84	2.19	1.91	3.26	3.09	1.2	May	2.61	3	4	1	3	-.42	4.7	37.97	Inactive	40.4	1.7	0
1486	58	25.19	38.8	63.99	37.76	76.56	24.73	.8	2.39	16.03	.71	.7	8.7	2.28	1.87	2.98	2.25	.9	May	-.89	2	4	0	2	-.03	.05	34.4	Inactive	28.2	2.09	0
1487	58	25.44	38.98	64.42	37.68	76.66	24.72	.81	2.38	16.02	.72	.7	8.7	3.88	2.47	2.56	1.72	.97	May	3.01	1	2	0	4	-.1	.05	39.97	Intermediate occupations	49	1.69
1488	58	27.99	39.54	67.53	37.11	76.65	24.75	.81	2.39	16.04	.72	.69	8.7	2.29	2.16	4.81	3.22	1.5	May	2.51	3	4	1	4	-.6	.05	34.55	Routine & manual occupations	51	2.73	0
1489	58	23.24	36.76	60	38.92	75.68	23.95	.68	2.02	15.55	.61	.59	8.4	2.25	1.97	4.66	3.78	1.05	May	2.91	2	2	1	1	.34	.3	33.85	Unclassified [in work,occ unknown]	83	2.92	0
1490	58	25.34	38.92	64.26	37.71	76.62	24.71	.8	2.37	16.02	.72	.7	8.69	2.56	2.49	5.41	3.39	2.26	May	7.61	5	2	1	4	.26	.2	42.58	Intermediate occupations	92.8	3.38	1
1491	58	26.47	39.28	65.75	37.44	76.72	24.74	.81	2.39	16.03	.72	.7	8.71	1.5	1.5	3.75	2.68	1.51	May	-2.99	3	2	0	3	-.17	.05	37.97	Routine & manual occupations	31.4	1.76	0
1492	58	23.26	37.51	60.77	38.68	76.2	24.4	.74	2.2	15.84	.66	.64	8.56	2.18	1.91	2.45	2.08	.84	May	-.49	1	4	0	4	-.42	1.7	38.58	Inactive	21.8	1.32	1
1493	58	24.64	38.28	62.92	38.2	76.48	24.55	.76	2.3	15.9	.68	.67	8.64	1.88	1.67	2.77	2.1	1.05	May	-4.59	3	4	0	3	-.35	.2	35.41	Routine & manual occupations	16.8	1.57	0
1494	58	43.27	48.05	91.31	33.83	81.88	27.08	1.24	4.29	17.01	1.11	1.28	10.07	1.52	1.49	3.11	2.67	1.31	May	-3.19	3	2	1	3	-.21	.6	37.97	Inactive	19.6	1.45	0
1495	58	24.87	38.58	63.46	37.86	76.44	24.64	.79	2.32	15.98	.7	.68	8.65	1.82	1.64	2.59	2.19	1.29	May	2.41	1	2	1	3	.48	3	34.27	Routine & manual occupations	55	1.53	0
1496	58	27.44	39.39	66.83	37.25	76.64	24.77	.81	2.41	16.04	.72	.7	8.73	1.74	1.49	3.01	2.01	.81	May	-1.79	3	2	1	3	-.21	.05	34.55	Inactive	44.8	2.3	0
1497	58	28.36	40.64	69	36.94	77.58	25.19	.91	2.73	16.24	.81	.81	8.95	2.02	1.66	2.46	2.04	.89	May	.41	2	2	0	4	-.39	.05	39.97	Intermediate occupations	24.8	1.42	0
1498	58	28.29	39.82	68.11	37.05	76.87	24.85	.83	2.46	16.09	.74	.71	8.76	1.4	1.36	3.09	1.74	1.54	May	-1.59	3	2	1	2	-.5	.7	34.55	Routine & manual occupations	40.2	1.66	1
1499	58	14.65	29.97	44.62	43.91	73.88	22.64	.46	1.37	14.81	.41	.39	7.84	3.04	2.6	4.47	2.99	1.51	May	.21	3	2	0	4	-.46	.05	29.88	Intermediate occupations	50	2.4	0
1500	58	27.47	39.86	67.33	37.1	76.96	24.99	.88	2.59	16.16	.78	.76	8.83	1.82	1.64	3.08	2.09	1.03	May	-.79	3	2	1	2	-.32	.3	32.82	Inactive	29.6	1.34	0
1501	58	25.3	38.82	64.13	37.73	76.56	24.67	.8	2.35	16	.71	.69	8.68	1.63	1.45	2.56	2.04	.91	May	-4.69	2	4	1	2	-.32	.05	39.97	Inactive	27.2	1.54	0
1502	58	25.63	38.87	64.5	37.77	76.64	24.81	.83	2.44	16.07	.74	.7	8.75	2.23	1.87	3.6	2.16	1.01	May	-.19	3	4	1	3	-.28	.05	33.62	Intermediate occupations	49.8	2.04	0
1503	58	25	38.69	63.69	37.83	76.52	24.69	.8	2.36	16.01	.71	.69	8.69	2.46	1.87	3.28	1.54	.62	May	-1.59	5	2	1	4	-.13	.2	42.58	Managerial & professional occupations	51.8	2.68	1
1504	58	24.71	38.61	63.32	37.86	76.47	24.71	.8	2.36	16.03	.71	.69	8.68	1.7	1.57	4.01	3.07	1.23	May	-5.09	2	4	1	4	-.53	.05	33.72	Inactive	34.6	2.72	0
1505	58	34.12	40.35	74.47	36.61	76.96	24.73	.88	2.57	15.92	.78	.72	8.81	2.07	1.81	2.97	2.25	1.18	May	-1.29	3	2	1	3	-.06	.5	17.67	Intermediate occupations	27.4	1.48	0
1506	58	27.64	39.5	67.14	37.21	76.71	24.81	.82	2.44	16.06	.73	.7	8.75	1.98	1.83	3.46	2.74	1.26	May	1.51	5	2	1	4	-.06	.7	34.55	Intermediate occupations	95.60001	4.7	1
1507	58	28.46	39.81	68.27	36.98	76.8	24.8	.82	2.43	16.07	.73	.71	8.73	2.18	1.87	3.09	2.24	1.1	May	-1.79	3	2	0	4	-.28	.8	37.97	Inactive	22.2	.96	0
1508	58	27.89	39.59	67.48	37.09	76.68	24.73	.8	2.38	16.04	.72	.7	8.7	1.95	1.76	2.76	2.29	1.05	May	.11	1	4	0	2	-.28	.05	39.97	Routine & manual occupations	23.8	1.16	1
1509	59	24.27	38.03	62.3	38.19	76.23	24.44	.78	2.3	15.81	.69	.66	8.63	2.29	2.13	4.93	3.28	1.78	June	1.01	1	4	1	3	.81	.05	31.95	Intermediate occupations	37.8	1.51
1510	59	23.65	37.83	61.48	38.32	76.15	24.39	.76	2.25	15.79	.68	.65	8.59	1.67	1.41	3.01	1.2	.86	June	-5.09	3	1	0	3	1.13	.7	31.95	Managerial & professional occupations	43	2.01	1
1511	59	24.55	37.77	62.32	38.16	75.93	24.28	.73	2.15	15.77	.65	.62	8.51	1.95	1.62	3.19	1.55	.71	June	-1.89	1	1	0	4	1.13	.05	28.55	Intermediate occupations	23.2	.72	1
1512	59	25.75	38.17	63.92	37.88	76.06	24.35	.73	2.19	15.81	.66	.64	8.54	1.21	1.13	3.15	1.96	.81	June	-5.19	2	4	1	3	.62	.05	24.79	Routine & manual occupations	42	2.1	0
1513	59	24.73	37.82	62.55	38.1	75.92	24.27	.73	2.14	15.76	.65	.62	8.51	1.82	1.5	2.89	1.48	.75	June	1.81	1	1	0	4	1.13	.3	28.55	Intermediate occupations	37.4	1.74	1
1514	59	25.51	38.07	63.57	37.92	75.98	24.33	.73	2.16	15.81	.65	.63	8.52	1.93	1.82	3.24	2.74	1.48	June	-3.69	1	4	1	3	.77	.05	24.79	Intermediate occupations	29	1.46	1
1515	59	24.86	37.88	62.74	38.1	75.98	24.31	.73	2.17	15.78	.65	.63	8.53	2.14	1.92	5.01	2.71	1.19	June	1.71	4	1	0	4	1.09	.6	28.55	Routine & manual occupations	93.2	4.1	1
1516	59	23.43	37.56	60.98	38.39	75.95	24.28	.73	2.16	15.76	.65	.63	8.52	1.76	1.4	2.32	1.35	.7	June	-3.89	5	4	0	3	.84	.05	23.76	Managerial & professional occupations	22.4	1.27	0
1517	59	29.85	40.25	70.1	36.95	77.2	24.85	.84	2.65	15.99	.75	.77	8.87	2.03	1.81	3.72	2.31	1.07	June	-.49	1	4	1	4	.62	.5	38.99	Managerial & professional occupations	50	2.12	1
1518	59	23.7	37.76	61.47	38.31	76.08	24.36	.74	2.19	15.81	.66	.64	8.55	1.86	1.55	3.43	1.74	.72	June	-1.19	1	4	1	4	.81	.5	23.76	Managerial & professional occupations	45	1.86	1
1519	59	23.33	37.56	60.9	38.4	75.96	24.29	.73	2.16	15.77	.65	.63	8.52	1.71	1.43	2.75	1.67	.7	June	-5.59	5	4	0	2	.84	.1	29.21	Unclassified [in work,occ unknown]	33	2.3	1
1520	59	25.76	38.13	63.89	37.86	75.98	24.33	.73	2.16	15.8	.65	.63	8.52	1.81	1.43	2.97	1.32	.52	June	-1.29	3	4	1	4	.7	.05	24.79	Inactive	57.4	2.87	0
1521	59	25.37	38.01	63.38	37.94	75.95	24.29	.73	2.15	15.78	.65	.62	8.51	2.28	1.79	3.27	1.78	.65	June	-1.49	3	1	0	4	1.17	.2	28.55	Inactive	29.8	.99	0
1522	59	24.73	38.4	63.12	38.11	76.5	24.67	.78	2.33	16.02	.7	.68	8.65	2.32	1.94	4.03	2.19	.94	June	1.81	2	1	0	3	1.17	.05	44.1	Routine & manual occupations	21.8	1.02	0
1523	59	28.28	39.47	67.75	37.17	76.64	24.73	.84	2.5	15.95	.75	.72	8.78	2.06	1.92	3.77	2.81	1.33	June	2.11	1	4	1	4	.88	.1	32.97	Routine & manual occupations	39.4	2.13	1
1524	59	26.43	38.31	64.74	37.69	75.99	24.32	.73	2.16	15.8	.65	.63	8.52	1.79	1.62	3.71	2.89	.99	June	-4.89	3	1	0	3	1.2	.05	24.79	Intermediate occupations	27.8	1.24	0
1525	59	24.55	37.77	62.32	38.16	75.93	24.28	.73	2.15	15.77	.65	.62	8.51	2.46	2.21	4.76	3.32	1.36	June	-2.79	1	1	1	4	1.17	.05	28.55	Intermediate occupations	44.6	2.32	1
1526	59	24.55	38.31	62.86	38.13	76.44	24.55	.77	2.31	15.91	.69	.67	8.64	2.33	2.04	4.81	3.12	1.26	June	-.99	1	4	1	3	.77	.05	35.67	Inactive	34	1.49	0
1527	59	25.74	38.01	63.75	37.99	76	24.28	.73	2.2	15.75	.66	.64	8.53	2.76	2.5	5.01	4.06	1.76	June	11.11	1	1	1	4	1.09	2	33.88	Managerial & professional occupations	77	2.29	1
1528	59	22.91	37.03	59.94	38.75	75.77	24.09	.7	2.13	15.62	.63	.61	8.46	2.22	1.91	4.33	2.32	.86	June	3.61	5	1	0	4	1.75	.05	50.69	Managerial & professional occupations	80.6	2.71	1
1529	59	27.9	39.63	67.53	37.36	76.99	24.77	.83	2.59	15.93	.74	.73	8.84	1.6	1.4	2.7	2.54	.98	June	-2.69	3	4	1	2	.55	.3	48.96	Inactive	57	2.93	1
1530	59	25.93	38.54	64.47	37.77	76.32	24.48	.78	2.32	15.84	.7	.67	8.64	2.14	2.06	2.98	2.77	1.69	June	8.01	2	1	1	4	1.38	.05	31.95	Intermediate occupations	124.4	5.06	0
1531	59	23.51	37.79	61.3	38.33	76.12	24.36	.75	2.22	15.79	.67	.64	8.57	2.44	1.86	3.4	1.96	.43	June	7.21	1	4	0	4	.81	.05	31.95	Managerial & professional occupations	82.8	3.01
1532	59	23.69	37.76	61.45	38.31	76.07	24.36	.74	2.19	15.81	.66	.64	8.55	2.02	1.85	3.54	2.77	1.47	June	1.51	3	1	1	4	1.38	.2	33.94	Intermediate occupations	78.2	2.79	0
1533	59	24.38	37.7	62.08	38.39	76.08	24.37	.73	2.19	15.82	.65	.64	8.55	1.88	1.58	2.71	1.88	.83	June	.81	1	1	1	2	1.2	3.9	37.86	Routine & manual occupations	72	2.6	1
1534	59	30.72	40.25	70.97	36.6	76.85	24.85	.87	2.59	16.01	.78	.74	8.84	1.17	1.07	2.6	2.28	.72	June	-.49	2	1	1	4	1.13	.1	32.97	Routine & manual occupations	76.6	3.16	1
1535	59	26	38.51	64.51	37.8	76.31	24.48	.78	2.33	15.83	.7	.67	8.65	1.79	1.61	2.92	2.51	1.3	June	-1.69	1	4	1	3	.81	4.2	38.99	Intermediate occupations	60.8	2.94	0
1536	59	24.96	38.42	63.38	37.89	76.3	24.49	.78	2.35	15.84	.69	.68	8.66	1.92	1.67	3.62	1.93	.94	June	-5.59	1	1	1	2	1.17	.05	26.21	Routine & manual occupations	26.2	1.05	1
1537	59	25.28	37.99	63.27	37.99	75.97	24.31	.73	2.16	15.79	.65	.63	8.52	1.85	1.83	3.91	3.16	1.79	June	-2.79	3	4	1	3	.55	.05	28.55	Routine & manual occupations	47.8	1.36	0
1538	59	27.62	39.39	67.01	37.32	76.71	24.78	.86	2.55	15.97	.77	.73	8.81	1.95	1.75	2.27	2.31	.84	June	1.91	4	1	0	4	1.28	1.2	32.97	Managerial & professional occupations	20.8	.85	1
1539	59	24.19	37.67	61.86	38.36	76.03	24.31	.73	2.21	15.77	.66	.64	8.54	1.62	1.45	3.38	1.84	.81	June	-1.79	3	1	1	4	1.13	.05	40.94	Inactive	26	1.35	0
1540	59	27.97	39.5	67.47	37.24	76.74	24.81	.87	2.57	15.98	.77	.74	8.83	3.13	2.42	2.8	2.75	1.14	June	7.51	4	4	1	4	.62	.8	32.97	Unclassified [in work,occ unknown]	100.8	3.71	0
1541	59	40.47	45.28	85.75	34.49	79.77	26.96	1.4	4.21	16.89	1.25	1.19	10.07	2.1	1.95	4.5	3.28	1.29	June	5.21	2	1	0	4	1.17	.05	32.97	Managerial & professional occupations	18.8	.83	0
1542	59	25.73	38.32	64.05	37.9	76.22	24.42	.77	2.29	15.8	.68	.66	8.61	1.76	1.67	3.18	2.79	1.75	June	-2.09	3	4	1	3	.55	.3	38.99	Intermediate occupations	28	.97	1
1543	59	25.15	37.99	63.14	38.02	76.01	24.35	.73	2.18	15.81	.65	.63	8.54	2.01	1.71	3.54	2.17	.76	June	2.71	2	1	1	3	1.13	1.4	24.79	Routine & manual occupations	60	2.54	0
1544	59	25.03	37.96	62.99	37.98	75.94	24.28	.73	2.14	15.77	.65	.62	8.51	2.36	2.12	4.97	3.02	1.16	June	1.21	2	4	0	4	.77	.1	23.76	Managerial & professional occupations	35.8	1.75	0
1545	59	25.49	38.05	63.54	37.89	75.94	24.3	.73	2.14	15.79	.65	.62	8.51	2.47	2.34	4.12	3.67	2.41	June	3.51	3	4	1	3	.62	.2	24.79	Inactive	62	2.95	1
1546	59	25.41	38.01	63.43	38.15	76.17	24.43	.78	2.36	15.79	.7	.68	8.64	1.98	1.72	3.73	2.48	.94	June	1.71	2	1	1	3	1.2	.05	44.31	Intermediate occupations	82.4	2.92	1
1547	59	25.51	38.05	63.56	37.89	75.95	24.3	.73	2.14	15.79	.65	.62	8.51	2.47	2.21	4.72	2.7	1.35	June	2.51	1	1	0	4	1.17	.05	24.79	Managerial & professional occupations	26.6	1.22	0
1548	59	26.75	38.65	65.4	37.65	76.3	24.45	.77	2.32	15.82	.69	.67	8.63	1.84	1.54	2.89	1.82	.8	June	-4.59	3	4	0	4	.55	.9	38.99	Routine & manual occupations	46.6	1.98	1
1549	59	23.53	37.7	61.24	38.35	76.05	24.34	.75	2.21	15.78	.67	.64	8.56	2.41	2.12	4.1	2.99	1.26	June	1.11	3	4	1	4	.59	.05	31.95	Routine & manual occupations	68.8	2.46	0
1550	59	26.47	38.62	65.08	37.93	76.54	24.69	.85	2.57	15.89	.76	.74	8.8	2.51	2.2	4.04	2.94	1.29	June	2.81	1	4	0	4	.84	3.3	44.31	Routine & manual occupations	69.8	2.69	1
1551	59	26.74	38.82	65.57	37.68	76.5	24.5	.77	2.35	15.85	.69	.68	8.65	2.39	1.97	3.58	2.37	1.04	June	1.71	2	4	1	2	.77	.1	28.55	Intermediate occupations	51.6	2.16	0
1552	59	25.42	38.02	63.45	37.92	75.94	24.28	.73	2.14	15.78	.65	.62	8.51	2.2	2	3.97	2.97	1.42	June	1.71	3	4	0	4	.99	.05	28.55	Routine & manual occupations	38	1.68	0
1553	60	23.92	38.1	62.02	38.28	76.37	24.48	.75	2.24	15.88	.67	.64	8.61	2.64	2.26	3.39	2.8	1.13	June	2.41	3	2	0	4	2.32	1	47.35	Routine & manual occupations	31.4	1.22	0
1554	60	34.03	40.42	74.45	36.64	77.07	24.8	.9	2.64	15.93	.81	.74	8.87	1.78	1.62	2.12	1.84	1.35	June	3.21	5	4	1	2	.59	11.4	17.67	Inactive	90.6	3.93
1555	60	23.27	37.38	60.64	38.59	75.97	24.41	.74	2.19	15.84	.66	.63	8.58	1.93	1.67	1.92	1.56	1.25	June	-1.99	1	2	1	4	1.64	.2	33.32	Routine & manual occupations	28	1.37	0
1556	60	30.11	40.67	70.77	36.56	77.22	25.06	.9	2.69	16.15	.8	.78	8.91	2.84	2.5	4.9	3.46	1.57	June	4.61	5	4	0	4	1.06	.1	55.02	Routine & manual occupations	64.2	3.28	0
1557	60	23.27	37.64	60.91	38.47	76.11	24.42	.74	2.19	15.85	.66	.63	8.56	1.81	1.73	2.91	2.17	1.5	June	2.21	3	2	1	2	.15	.3	57.26	Inactive	85.6	1.17	0
1558	60	23.75	37.84	61.59	38.35	76.2	24.48	.75	2.23	15.89	.67	.65	8.59	2.16	2	4.31	2.78	1.36	June	.51	1	4	0	2	1.46	5.7	38.48	Routine & manual occupations	44.8	1.89	1
1559	60	25.34	38.68	64.03	37.97	76.65	24.71	.81	2.4	15.97	.73	.69	8.74	1.89	1.67	3.78	2.21	.88	June	-.19	3	4	0	2	.84	.05	38.78	Intermediate occupations	38.4	1.59	1
1560	60	23.81	37.98	61.79	38.32	76.3	24.47	.75	2.22	15.87	.67	.64	8.6	2.07	1.91	2.67	2.29	1.48	June	-.49	2	2	1	3	1.89	.05	47.35	Inactive	40.2	2.08	0
1561	60	23.06	37.23	60.28	38.67	75.89	24.35	.72	2.16	15.81	.65	.63	8.54	1.99	1.81	3.7	2.7	1.22	June	-1.39	3	4	1	4	2.22	.1	33.32	Inactive	59.4	2.23	0
1562	60	25.83	38.12	63.95	37.94	76.06	24.31	.73	2.2	15.77	.65	.64	8.54	2.34	2.23	4.09	2.75	1.59	June	5.21	1	4	1	4	.7	5.5	40.94	Inactive	51.4	1.28	0
1563	60	23.51	37.66	61.17	38.48	76.13	24.49	.75	2.24	15.87	.67	.64	8.61	1.92	1.81	4.05	3.42	1.33	June	-.89	3	4	1	2	3.3	.05	35.1	Intermediate occupations	29.8	1.2	0
1564	60	23.64	37.73	61.37	38.41	76.14	24.48	.75	2.23	15.88	.67	.65	8.6	1.95	1.34	1.59	.98	.39	June	-.29	2	4	0	4	1.85	.1	38.48	Managerial & professional occupations	20.2	.94	0
1565	60	25.18	37.72	62.9	38.17	75.89	24.23	.73	2.18	15.72	.65	.63	8.51	2.35	1.88	2.87	2.34	.86	June	7.11	2	2	1	4	1.2	.1	44.31	Intermediate occupations	48.8	1.73	1
1566	60	23.6	37.03	60.63	38.9	75.93	24.37	.75	2.31	15.77	.67	.66	8.61	2.35	1.5	1.57	1.43	.5	June	4.71	2	2	0	4	2.5	.05	58.66	Intermediate occupations	40.6	1.58	1
1567	60	23.37	37.56	60.92	38.52	76.07	24.42	.74	2.17	15.89	.66	.64	8.53	2.07	1.86	5.1	2.75	1.13	June	7.91	2	4	1	4	.37	.05	36.49	Routine & manual occupations	95	3.88	0
1568	60	23.12	37.47	60.59	38.55	76.02	24.41	.74	2.18	15.85	.66	.63	8.56	1.88	1.52	1.82	1.67	1.02	June	-1.99	3	2	1	2	.88	.7	36.66	Managerial & professional occupations	37.6	2.05	1
1569	60	23.31	37.6	60.9	38.47	76.07	24.42	.74	2.19	15.86	.66	.63	8.56	1.97	1.74	4.43	2.43	.97	June	1.21	3	4	1	4	2.11	.05	36.66	Inactive	58.4	1.66	1
1570	60	23.81	37.98	61.79	38.32	76.3	24.47	.75	2.22	15.87	.67	.64	8.6	1.57	1.4	3.31	2.07	.94	June	-12.09	3	2	1	3	2.5	.2	47.35	Routine & manual occupations	48.4	3.87	0
1571	60	23.57	37.86	61.43	38.37	76.23	24.46	.75	2.22	15.88	.67	.64	8.59	1.87	1.7	3.13	2.82	1.43	June	.81	3	4	1	3	.52	.4	57.26	Routine & manual occupations	43.6	1.74	0
1572	60	23.57	37.86	61.43	38.37	76.23	24.46	.75	2.22	15.88	.67	.64	8.59	2.11	1.9	3.85	2.56	1.21	June	-1.59	3	4	1	2	2.29	.5	57.26	Inactive	52.4	2.41	0
1573	60	23.96	37.97	61.92	38.31	76.27	24.5	.76	2.24	15.88	.68	.65	8.61	2.8	2.11	3.24	2.04	.89	June	-.89	1	4	0	3	3.37	.3	47.35	Inactive	33.6	1.6	1
1574	60	24.34	38.07	62.41	38.23	76.3	24.62	.78	2.35	15.93	.69	.67	8.69	1.77	1.66	3.04	2.42	1.62	June	-9.79	3	2	0	2	2.14	.3	38.48	Routine & manual occupations	27.6	2.27	0
1575	60	23.53	37.68	61.21	38.44	76.11	24.46	.75	2.22	15.87	.67	.64	8.58	1.94	1.85	4.13	3.33	1.54	June	3.21	5	2	1	3	2.11	.05	38.48	Intermediate occupations	70.3	2.97	0
1576	60	23.04	37.43	60.48	38.57	76	24.4	.74	2.17	15.85	.66	.63	8.56	2.06	1.85	4.28	3.1	1.23	June	.51	3	4	1	4	1.67	.05	36.66	Inactive	52.6	2.43	0
1577	60	23.83	37.93	61.76	38.31	76.24	24.49	.75	2.24	15.89	.67	.65	8.6	1.9	1.44	2.18	1.47	.61	June	-3.69	3	2	0	3	3.01	.5	36.66	Routine & manual occupations	36.4	1.47	0
1578	60	23.91	37.94	61.85	38.32	76.26	24.49	.76	2.24	15.88	.68	.64	8.61	2.33	1.56	1.72	1.6	.89	June	5.91	2	2	1	4	.73	.2	47.35	Inactive	109	3.54	0
1579	60	23.82	38.07	61.89	38.3	76.36	24.48	.75	2.23	15.87	.67	.64	8.6	1.94	1.4	2.13	1.21	.51	June	-2.89	3	2	0	2	.48	.05	47.35	Routine & manual occupations	20	1.28	1
1580	60	24.9	38.4	63.3	38.1	76.5	24.66	.8	2.37	15.95	.71	.68	8.71	2.03	1.93	4.16	3.17	1.45	June	4.91	3	4	1	3	3.12	.5	34.31	Routine & manual occupations	67.6	2.15	0
1581	60	23.58	37.91	61.48	38.36	76.27	24.45	.75	2.21	15.87	.67	.64	8.59	2.32	1.99	3.8	2.63	1.08	June	-.29	5	2	0	4	2	2.2	47.35	Inactive	59.2	2.21	0
1582	60	23.58	37.91	61.48	38.36	76.27	24.45	.75	2.21	15.87	.67	.64	8.59	2.3	2.17	4.02	2.73	1.55	June	4.51	3	4	0	3	1.2	.1	47.35	Routine & manual occupations	37.6	1.49	1
1583	60	24.57	37.97	62.54	38.26	76.23	24.66	.78	2.4	15.93	.69	.69	8.74	2.06	1.82	3.48	2.49	1.01	June	5.51	2	2	0	4	1.38	.4	33.32	Routine & manual occupations	72.8	2.39	0
1584	60	23.87	38.04	61.92	38.29	76.33	24.5	.76	2.25	15.89	.68	.65	8.61	1.73	1.59	2.97	2.55	1.03	June	2.61	3	2	1	4	2.97	1.2	57.26	Inactive	47.6	2.89	0
1585	60	23.58	37.91	61.48	38.36	76.27	24.45	.75	2.21	15.87	.67	.64	8.59	2.23	2	3.86	3.27	1.47	June	2.51	2	2	0	2	2.94	.6	47.35	Inactive	64.4	2.46	0
1586	60	23.81	37.98	61.79	38.32	76.3	24.47	.75	2.22	15.87	.67	.64	8.6	1.97	1.69	2.19	2.12	1.03	June	2.31	3	2	1	4	2	.4	47.35	Routine & manual occupations	73.4	2.34	0
1587	60	23.94	38.03	61.97	38.28	76.31	24.5	.76	2.25	15.9	.68	.65	8.61	1.67	1.44	2.22	1.9	.79	June	.81	3	2	1	4	1.02	.3	57.26	Unclassified [in work,occ unknown]	31	1.39	0
1588	60	24.3	38.13	62.43	38.23	76.36	24.54	.76	2.28	15.9	.67	.66	8.64	2.2	1.84	3.44	2.11	.87	June	.61	1	2	1	4	.62	.5	36.84	Inactive	96	3.81	1
1589	60	26.49	39.56	66.05	37.66	77.22	24.9	.83	2.57	16.06	.74	.75	8.83	2.65	1.97	3.27	1.75	.68	June	2.91	2	4	0	4	.66	.05	36.66	Routine & manual occupations	46.2	2.12	0
1590	60	25.25	38.8	64.05	37.96	76.75	24.7	.79	2.42	15.98	.71	.71	8.72	1.89	1.79	4.19	2.72	1.39	June	-3.49	3	2	0	3	1.13	.05	36.66	Routine & manual occupations	19.8	1.18	0
1591	60	24.94	38.34	63.28	38.08	76.41	24.76	.8	2.46	15.98	.72	.69	8.78	2.16	1.95	4.24	2.56	1.3	June	.81	3	4	1	4	1.71	.05	38.48	Routine & manual occupations	32.4	.88	0
1592	60	23.31	37.57	60.88	38.49	76.06	24.42	.74	2.19	15.86	.66	.64	8.56	2.04	1.68	2.94	1.68	.87	June	1.81	5	4	1	2	1.93	.05	36.66	Routine & manual occupations	56.2	2.21	0
1593	60	23.25	37.55	60.8	38.51	76.07	24.43	.74	2.2	15.86	.66	.63	8.57	2.14	1.79	2.61	1.96	1.15	June	2.41	3	2	1	4	2.03	.5	57.26	Inactive	75	2.64	0
1594	60	23.38	37.68	61.06	38.45	76.12	24.43	.74	2.19	15.86	.66	.63	8.57	2.2	1.89	4.79	2.82	.95	June	3.81	2	4	0	2	3.41	.05	47.35	Routine & manual occupations	89.8	4.1	0
1595	60	23.93	38.01	61.94	38.28	76.3	24.5	.76	2.25	15.9	.67	.65	8.61	2.18	1.91	3.63	2.42	1.42	June	3.71	2	4	0	4	2.03	.3	57.26	Routine & manual occupations	45.2	2.47	0
1596	61	28.79	41.21	69.99	36.16	77.36	25.04	.86	2.48	16.25	.77	.73	8.79	1.91	1.66	3.95	2.21	.87	October	-2.49	2	1	1	1	.34	.1	30.47	Intermediate occupations	20.8	.97	0
1597	61	52.02	50.12	102.14	32.18	82.3	28.69	1.86	5.42	17.68	1.66	1.52	11.01	1.88	1.37	2.08	1.2	.5	October	-.29	2	4	0	3	-.6	.05	55.02	Managerial & professional occupations	38.2	2.39	0
1598	61	56.38	51.6	107.97	31.46	83.05	29.25	1.99	5.85	17.93	1.77	1.64	11.33	1.51	1.36	3.61	2.23	.78	October	-4.09	2	1	1	1	.55	.5	55.02	Inactive	23.4	1.63	0
1599	61	31.01	40.96	71.97	36.37	77.34	25.21	.95	2.8	16.21	.85	.81	9	1.75	1.58	2.48	2.14	1.11	October	-4.49	2	1	0	1	.55	.05	30.18	Managerial & professional occupations	18.2	2.26	1
1600	61	29.93	40.45	70.38	36.63	77.08	25.04	.91	2.67	16.14	.81	.77	8.9	1.72	1.62	3.31	2.65	1.26	October	1.01	5	1	1	2	.41	1	30.18	Intermediate occupations	27.6	.97	0
1601	61	47.51	48.55	96.06	32.93	81.48	28.22	1.67	5.1	17.51	1.49	1.48	10.71	2.4	2.05	2.41	2.19	1.67	October	6.41	1	1	0	3	.26	.3	55.02	Intermediate occupations	35.4	.92	0
1602	61	25.15	38.89	64.05	37.7	76.59	24.79	.82	2.44	16.05	.73	.7	8.74	1.66	1.47	3.84	2.41	.84	October	-6.09	1	4	1	1	-.17	2.9	41.73	Inactive	59.4	3.49	1
1603	61	29.09	39.98	69.08	36.79	76.78	24.82	.84	2.5	16.05	.75	.72	8.76	1.9	1.63	3.2	1.72	.87	October	-2.39	2	1	1	2	.48	.4	30.18	Routine & manual occupations	60.2	2.38	0
1604	61	31.37	41.3	72.67	36.3	77.6	25.4	1	2.96	16.29	.89	.85	9.11	1.31	1.15	2.87	1.72	.62	October	-6.09	2	1	1	2	.34	.05	30.18	Managerial & professional occupations	31	1.69	0
1605	61	27.98	39.53	67.51	37.08	76.61	24.74	.83	2.45	16.01	.74	.71	8.73	2.84	2.23	4.13	2.25	.88	October	5.51	4	1	1	1	.19	.05	30.18	Routine & manual occupations	97.6	3.36	0
1606	61	60.06	53.18	113.24	30.82	84	30.33	2.16	6.72	18.43	1.93	1.97	11.9	1.55	1.43	2.7	2.02	1.09	October	-9.29	3	4	0	1	-.32	.1	55.02	Intermediate occupations	26.8	2.13	0
1607	61	55.56	51.27	106.83	31.59	82.86	29.3	1.96	5.91	17.96	1.74	1.69	11.34	1.78	1.27	1.58	1.07	.55	October	-2.09	2	4	0	1	.05	.05	55.02	Inactive	35	1.68	0
1608	61	42.75	46.7	89.45	33.87	80.57	27.38	1.48	4.46	17.13	1.32	1.27	10.25	1.73	1.46	2.76	2.03	1.03	October	-1.29	2	4	1	1	.12	.05	55.02	Intermediate occupations	77.2	4.21	1
1609	61	26.13	38.59	64.72	37.5	76.09	24.48	.74	2.21	15.94	.66	.64	8.54	1.54	1.39	1.85	1.34	.9	October	-7.49	2	1	1	1	.48	.05	40.16	Managerial & professional occupations	21.8	1.21	1
1610	61	25.22	38.92	64.14	37.68	76.6	24.75	.81	2.41	16.05	.73	.7	8.71	2.11	1.69	3.14	1.62	.78	October	-4.09	1	4	0	1	-.03	1	52.91	Routine & manual occupations	20	.85	1
1611	61	31.27	41.2	72.47	36.33	77.53	25.37	.98	2.95	16.26	.88	.85	9.11	2.35	1.88	2.85	1.84	1.2	October	2.01	1	4	1	1	-.39	1.1	55.02	Routine & manual occupations	54.8	2.2	1
1612	61	28.45	39.78	68.23	37	76.78	24.86	.86	2.55	16.05	.77	.74	8.81	1.66	1.52	3.1	2.47	1.07	October	.31	3	1	1	1	.55	.2	55.02	Routine & manual occupations	74	3.5	0
1613	61	25.85	39.15	65	37.61	76.75	24.78	.84	2.46	16.03	.75	.71	8.75	2.12	2.04	3.1	2.87	1.73	October	-.29	1	1	0	2	.26	.5	48	Intermediate occupations	18.6	.77	1
1614	61	28.39	39.61	68.01	36.97	76.58	24.72	.82	2.42	16.01	.73	.7	8.71	2.4	2.04	4.02	2.46	.89	October	4.41	2	4	0	2	.05	.05	30.18	Managerial & professional occupations	59.4	2.59	0
1615	61	34.53	43.28	77.82	35.54	78.83	25.91	1.09	3.36	16.5	.98	.97	9.41	1.72	1.59	3.55	2.62	1.16	October	.01	2	4	0	1	.12	.05	55.02	Intermediate occupations	29	1.75	0
1616	61	28.27	39.49	67.76	36.9	76.39	24.61	.77	2.3	15.99	.69	.67	8.61	1.5	1.21	1.45	1.03	.6	October	1.41	1	1	1	2	.41	3.1	45.78	Routine & manual occupations	86.6	3.53	1
1617	61	27.99	40.16	68.16	36.99	77.16	24.93	.85	2.58	16.08	.76	.74	8.85	2.46	2.13	4.12	2.83	1.06	October	.91	1	4	1	1	-.24	2.3	52.96	Inactive	45.4	1.78	1
1618	61	31.95	41.49	73.44	36.13	77.62	25.28	.95	2.85	16.25	.85	.83	9.04	1.71	1.52	2.13	1.4	.7	October	-4.49	5	4	1	1	-.75	2.3	55.02	Intermediate occupations	25.4	1.51	0
1619	61	23.29	37.18	60.47	38.72	75.9	24.28	.73	2.17	15.75	.65	.63	8.53	1.92	1.55	2.44	1.45	.7	October	-3.19	4	4	1	1	-.1	.4	27.47	Intermediate occupations	58.8	2.61	0
1620	61	32.43	41.81	74.24	36.09	77.89	25.66	1.07	3.17	16.37	.96	.91	9.28	2.88	2.18	3.35	1.98	.88	October	.91	5	4	0	1	-.46	.05	31.49	Managerial & professional occupations	67.4	2.36	1
1621	61	25.82	38.64	64.46	37.65	76.29	24.56	.79	2.34	15.9	.7	.68	8.65	1.71	1.63	3.14	2.73	1.6	October	.21	4	1	1	3	.34	.3	31.49	Intermediate occupations	64.6	1.9	0
1622	61	31.19	41.04	72.23	36.32	77.36	25.21	.95	2.8	16.22	.85	.81	9	1.96	1.55	2.8	1.55	.65	October	.51	5	4	1	3	.05	1.7	30.18	Inactive	88.4	3.72	1
1623	61	28.34	39.43	67.77	36.99	76.42	24.62	.79	2.35	15.97	.71	.68	8.65	2	1.55	2.58	1.45	.69	October	.11	1	4	1	3	.05	.5	40.16	Routine & manual occupations	77.2	3.72	0
1624	61	46.89	47.66	94.55	33.08	80.74	27.75	1.56	4.74	17.3	1.39	1.37	10.45	1.83	1.82	4.08	2.72	1.46	October	.31	2	1	1	2	.48	.05	55.02	Inactive	54.2	2.08	0
1625	61	25.15	38.89	64.05	37.7	76.59	24.79	.82	2.44	16.05	.73	.7	8.74	1.59	1.46	3.64	2.02	.9	October	-5.89	1	1	1	1	.55	3.4	41.73	Routine & manual occupations	79.4	3.37	1
1626	61	25.92	38.93	64.86	37.4	76.33	24.61	.78	2.31	16	.7	.67	8.62	1.37	1.13	1.56	1.31	.56	October	-5.39	1	1	1	1	.12	2	49.58	Intermediate occupations	43	2.22	1
1627	61	32.9	42.3	75.2	35.91	78.21	25.64	1.05	3.13	16.4	.94	.91	9.24	2.18	1.59	2.39	1.3	.6	October	2.31	2	1	0	3	.19	3.8	55.02	Intermediate occupations	103.2	2.69	0
1628	61	24.87	38.53	63.4	38.08	76.61	24.66	.79	2.37	15.96	.7	.69	8.69	1.71	1.58	3.07	2.52	1.13	October	-1.39	5	1	1	3	.12	.8	38.48	Intermediate occupations	47.8	2.03	0
1629	62	24.32	38.28	62.6	37.99	76.28	24.57	.77	2.27	15.95	.69	.66	8.62	1.65	1.58	2.95	2.3	1.11	October	.41	5	2	1	3	.12	.1	34.4	Managerial & professional occupations	41	1.45	0
1630	62	23.28	37.66	60.95	38.46	76.13	24.42	.74	2.19	15.86	.66	.63	8.57	2.2	2.05	4.34	2.64	1.53	October	4.41	2	1	1	1	.12	.2	57.26	Routine & manual occupations	78.2	2.21	0
1631	62	25.23	38.89	64.12	37.83	76.72	24.61	.8	2.35	15.94	.71	.69	8.67	1.82	1.6	3.75	2.48	.88	October	.31	2	2	0	3	.12	.05	22.71	Managerial & professional occupations	20.4	1.05	0
1632	62	26.05	38.5	64.55	37.84	76.34	24.48	.78	2.35	15.83	.7	.68	8.65	2.28	2.19	4.38	2.98	1.57	October	6.91	2	2	1	1	-.03	.05	48.96	Routine & manual occupations	25.4	1.09	1
1633	62	25.05	38.73	63.78	37.94	76.67	24.57	.78	2.34	15.91	.7	.68	8.67	1.73	1.69	4.32	2.77	1.58	October	-2.09	2	1	1	1	-.13	.05	33.94	Managerial & professional occupations	90.2	3.98	1
1634	62	24.24	38.4	62.63	38.14	76.54	24.5	.78	2.35	15.83	.69	.67	8.68	2.01	1.8	2.8	2.06	1.19	October	6.11	2	2	1	2	.19	.05	31.95	Managerial & professional occupations	89.4	4	0
1635	62	23.92	37.81	61.73	38.02	75.82	24.24	.71	2.14	15.74	.64	.62	8.5	1.95	1.95	3.27	3.18	2.09	October	-.19	1	1	0	1	.34	.2	30.66	Intermediate occupations	50.2	2.44	0
1636	62	26.8	39.9	66.7	37.49	77.39	24.83	.84	2.53	16.03	.75	.74	8.81	2.2	1.92	2.93	2.34	1.11	October	6.11	2	2	1	2	.19	3.9	42.96	Routine & manual occupations	28.4	1.1	1
1637	62	25.47	38.82	64.29	37.65	76.47	24.65	.8	2.33	16	.71	.68	8.66	2.69	2.53	4.43	3.68	2.4	October	-3.59	4	2	0	2	-.03	.05	40.98	Routine & manual occupations	37.2	1.99	0
1638	62	23.73	37.91	61.63	38.29	76.2	24.4	.77	2.27	15.8	.68	.65	8.6	1.87	1.69	3.98	2.47	1.01	October	-2.39	2	1	1	1	-.13	.05	31.95	Managerial & professional occupations	40.6	1.99	0
1639	62	23.59	37.67	61.26	38.34	76.02	24.34	.74	2.17	15.8	.66	.63	8.54	1.58	1.5	2.34	1.72	1.05	October	-1.79	5	1	1	1	-.03	.3	23.76	Managerial & professional occupations	78.8	3.08	0
1640	62	25.94	39.14	65.08	37.55	76.7	24.81	.83	2.46	16.06	.74	.71	8.75	1.91	1.47	2.48	1.63	.81	October	.71	4	1	0	1	.05	.05	42.06	Intermediate occupations	101.6	4.54	0
1641	62	23.74	37.87	61.61	38.34	76.21	24.48	.75	2.23	15.89	.67	.65	8.59	1.94	1.57	2.07	1.6	.83	October	2.61	4	2	0	3	-.03	.05	36.66	Intermediate occupations	87.6	3.56	0
1642	62	25.55	38.95	64.5	37.87	76.83	24.71	.8	2.44	15.98	.71	.71	8.74	2.24	1.99	3.76	2.15	1.17	October	-1.79	2	1	1	1	.19	5.1	35.67	Managerial & professional occupations	25.2	1.22	1
1643	62	24.46	38.36	62.82	38.03	76.39	24.48	.77	2.27	15.87	.69	.66	8.61	1.97	1.71	2.94	2.43	.9	October	-1.09	1	1	0	1	.26	.5	22.71	Intermediate occupations	37.6	1.48	1
1644	62	23.91	37.97	61.88	38.19	76.16	24.38	.75	2.21	15.81	.67	.64	8.57	2.46	2.29	4.97	3.19	1.48	October	6.61	1	2	1	2	.26	.05	30.5	Managerial & professional occupations	93.2	3.32	1
1645	62	26.15	39.33	65.48	37.52	76.84	24.91	.83	2.54	16.11	.74	.75	8.81	2.3	2.19	4.81	2.8	1.46	October	5.71	4	1	1	1	-.13	.3	34.4	Intermediate occupations	122.8	3.89	1
1646	62	23.9	38.09	61.98	38.28	76.37	24.5	.76	2.25	15.89	.68	.65	8.61	2.89	2.4	3.01	2.39	1.54	October	.51	2	2	0	3	-.1	.2	57.26	Intermediate occupations	23.8	1.19	0
1647	62	29.87	39.96	69.83	37.11	77.08	25.03	.9	2.8	16.06	.81	.83	8.97	2.93	2.39	3.3	2.36	1.5	October	6.51	5	1	0	1	.26	.05	38.82	Intermediate occupations	107	3.33	0
1648	62	25.86	39.26	65.13	37.71	76.97	24.71	.81	2.43	15.98	.72	.71	8.73	1.54	1.34	2.96	1.86	.77	October	-5.19	4	1	1	1	-.13	.05	42.96	Routine & manual occupations	25.6	.78	0
1649	62	26.5	39.22	65.72	37.06	76.28	24.78	.78	2.33	16.17	.7	.68	8.61	1.61	1.61	3.59	3.28	1.56	October	-2.49	5	2	1	1	.26	.5	56.67	Unclassified [in work,occ unknown]	81.60001	4.07	0
1650	62	22.11	36.71	58.83	39.15	75.86	24.21	.71	2.09	15.74	.63	.61	8.47	1.89	1.88	4.31	3.35	1.71	October	1.91	4	2	0	1	.19	.05	38.33	Intermediate occupations	85.4	3.16	0
1651	62	24.74	38.53	63.27	37.98	76.5	24.53	.78	2.3	15.9	.69	.67	8.63	2.15	2.03	3.76	2.64	1.41	October	1.81	4	2	0	3	.12	.05	42.96	Intermediate occupations	29.6	.87	0
1652	62	26.34	39.66	66	37.47	77.13	24.89	.84	2.52	16.1	.75	.73	8.79	1.42	1.3	1.94	1.61	1.04	October	.21	1	2	0	3	.05	.1	42.06	Intermediate occupations	35	.68	1
1653	62	24.75	38.46	63.21	38.11	76.56	24.64	.78	2.36	15.96	.7	.68	8.68	3.36	3.24	4.43	4.26	2.75	October	4.61	4	2	0	2	.05	.05	38.48	Routine & manual occupations	54.2	1.23	0
1654	62	25.36	38.87	64.23	37.9	76.77	24.66	.79	2.4	15.95	.71	.7	8.71	1.59	1.58	3.54	2.68	1.52	October	.31	1	1	0	1	-.39	.05	33.94	Managerial & professional occupations	20	1.05	1
1655	62	18.67	32.99	51.66	41.75	74.74	23.37	.56	1.77	15.21	.5	.52	8.16	1.93	1.93	5.85	4.32	1.82	October	.21	2	2	1	2	.05	.4	33.02	Managerial & professional occupations	79.2	3.36	0
1656	62	24.7	38.17	62.87	38.15	76.32	24.73	.8	2.44	15.96	.71	.69	8.77	2.06	1.98	3.58	3.03	1.56	October	.71	3	2	0	3	.19	.05	36.66	Managerial & professional occupations	56.2	1.79	0
1657	62	23.48	37.68	61.16	38.36	76.04	24.33	.75	2.2	15.78	.67	.64	8.56	1.57	1.41	2.19	2.13	.83	October	-1.59	2	2	0	3	-.1	.05	31.95	Managerial & professional occupations	19.6	1.41	0
1658	62	26.5	39.08	65.58	37.28	76.35	24.6	.78	2.3	15.98	.69	.67	8.62	1.93	1.55	2.51	1.44	.76	October	1.81	2	1	0	1	.26	.05	52.96	Routine & manual occupations	43.6	1.9
1659	62	74.41	64.75	139.16	29.32	94.07	29.77	2.12	6.18	18.27	1.89	1.81	11.51	2.07	1.91	3.39	2.64	1.22	October	1.41	2	2	1	3	.19	.05	48	Intermediate occupations	68.60001	2.43	0
1660	62	23.73	37.91	61.63	38.29	76.2	24.4	.77	2.27	15.8	.68	.65	8.6	2.3	2.05	2.49	2.77	1.46	October	-1.59	2	2	1	1	.12	.05	31.95	Managerial & professional occupations	67	2.81	0
1661	62	25.38	38.04	63.42	37.98	76.02	24.3	.73	2.18	15.77	.65	.63	8.53	1.43	1.43	3.51	2.9	1.62	October	1.41	3	1	1	1	.34	.05	28.55	Intermediate occupations	83.2	2.72	0
1662	62	24.36	38.24	62.61	38.25	76.49	24.57	.77	2.3	15.92	.69	.67	8.64	3.31	1.95	2.1	1.54	1.3	October	2.11	4	2	0	2	.05	1.2	37.19	Routine & manual occupations	84.4	4.23	0
1663	62	29.09	40.84	69.92	36.93	77.76	25.51	.95	3.03	16.36	.85	.93	9.14	2.62	2.39	3.28	3.75	1.59	October	3.51	1	1	1	1	.26	4.8	34.65	Routine & manual occupations	81.8	3.21	1
1664	62	24.23	38.13	62.36	38.24	76.37	24.56	.77	2.29	15.92	.68	.67	8.63	1.71	1.49	2.75	1.93	.85	October	-4.49	4	1	0	1	.12	.05	38.48	Intermediate occupations	29.4	1.43	1
1665	62	25.73	38.14	63.87	37.81	75.95	24.3	.73	2.14	15.79	.65	.62	8.51	2.18	2.18	4.54	3.81	2.14	October	4.81	5	2	0	1	.12	.2	23.76	Routine & manual occupations	68.60001	3.25	1
1666	62	23.82	37.83	61.65	38.3	76.13	24.4	.75	2.21	15.84	.67	.64	8.56	1.79	1.68	2.09	2.03	1.11	October	4.71	5	2	1	1	.19	.5	33.94	Managerial & professional occupations	44.2	1.56	1
1667	62	23.53	37.57	61.1	38.36	75.93	24.28	.73	2.15	15.77	.65	.62	8.52	2.28	2.07	3.18	2.82	1.59	October	2.61	2	1	1	1	-.24	.05	23.76	Managerial & professional occupations	54.2	2.11	0
1668	62	24.26	38.06	62.32	38.28	76.34	24.5	.75	2.25	15.89	.67	.65	8.61	2	1.66	3.28	1.98	.71	October	-1.09	4	2	0	2	-.1	.05	35.41	Unclassified [in work,occ unknown]	69.8	2.55	0
1669	63	33.72	42.9	76.62	36.01	78.92	26.21	1.11	3.59	16.56	.99	.99	9.65	2.35	1.83	2.93	2.12	.92	January	-.89	3	1	0	3	-1.11	.1	36.2	Intermediate occupations	29.6	1.35	0
1670	63	27.51	39.34	66.84	37.49	76.83	24.65	.79	2.45	15.92	.71	.71	8.73	1.7	1.52	3.33	3.03	.93	January	-.99	2	4	1	3	-2.05	.05	24.79	Inactive	70.6	2.89	0
1671	63	24.19	37.91	62.1	38.3	76.21	24.57	.77	2.32	15.9	.68	.67	8.67	1.99	1.79	2.31	2.08	1.33	January	1.61	3	4	1	4	-1.54	.05	36.84	Routine & manual occupations	61.4	1.81	0
1672	63	23.94	37.69	61.63	38.29	75.98	24.34	.73	2.17	15.81	.65	.63	8.53	2.5	2.01	3.62	2.26	.9	January	4.71	5	4	0	1	-2.05	.2	24.79	Routine & manual occupations	77.4	3.87	0
1673	63	26.65	40.16	66.81	37.74	77.9	24.9	.8	2.61	15.98	.72	.71	8.92	2.15	1.91	4.11	2.58	1.09	January	.71	3	1	1	3	-1.62	.05	40.41	Inactive	23.2	.69	0
1674	63	24.09	37.8	61.89	38.35	76.15	24.54	.76	2.29	15.89	.67	.66	8.65	1.74	1.62	3.42	2.26	1.53	January	-4.09	3	1	1	4	-1.26	.05	35.33	Managerial & professional occupations	32.4	1.24	1
1675	63	28.32	40.55	68.87	36.89	77.44	25.33	.92	2.89	16.25	.82	.81	9.09	2.43	2.09	2.26	2.53	1.11	January	1.11	2	1	0	4	-1.11	.05	41.73	Managerial & professional occupations	85.6	4.05	0
1676	63	23.21	37.6	60.82	38.59	76.19	24.41	.74	2.19	15.84	.66	.63	8.56	1.87	1.74	3.62	2.58	1.3	January	-1.79	3	1	0	2	-1.69	.5	40.41	Intermediate occupations	49.2	2.43	1
1677	63	24	38.02	62.02	38.28	76.3	24.5	.76	2.24	15.89	.68	.64	8.61	1.67	1.52	2.85	2.23	1.01	January	-1.09	3	4	1	1	-1.69	.5	47.35	Routine & manual occupations	98	4.51	0
1678	63	23.52	37.68	61.2	38.47	76.15	24.45	.75	2.22	15.87	.67	.64	8.58	1.56	1.24	2.23	1.48	.44	January	-4.79	3	4	1	4	-1.54	.05	37.19	Intermediate occupations	36.4	1.89	0
1679	63	24.17	38.04	62.21	38.24	76.28	24.51	.75	2.25	15.9	.67	.65	8.61	1.85	1.56	2.23	1.96	.96	January	2.51	3	4	0	3	-1.54	.05	37.17	Routine & manual occupations	29.8	1.46	0
1680	63	26.32	39.15	65.47	37.76	76.91	24.92	.86	2.57	16.05	.77	.73	8.87	1.96	1.84	4.56	2.91	1.32	January	2.11	3	1	1	2	-.97	.2	34.31	Intermediate occupations	91.8	2.66	1
1681	63	27.78	40.13	67.91	37.03	77.16	25.08	.88	2.66	16.18	.79	.77	8.9	2.32	1.55	2.05	1.22	.61	January	-.39	2	1	0	1	-1.04	.2	46.41	Intermediate occupations	42.6	2.53	0
1682	63	34.36	43.43	77.79	36.27	79.7	26.05	1.04	3.54	16.56	.92	1.07	9.5	2.02	2	3.45	2.9	2.04	January	-2.19	1	1	0	2	-1.4	4.1	38.7	Routine & manual occupations	22.6	1.19	1
1683	63	23.92	38.06	61.98	38.2	76.26	24.47	.75	2.21	15.88	.67	.64	8.58	2.84	2.52	5.24	3.27	1.49	January	8.91	5	1	1	4	-1.26	.05	37.02	Routine & manual occupations	51	2.34	0
1684	63	26.51	39.29	65.79	38.04	77.33	24.75	.86	2.46	16.01	.77	.72	8.74	1.91	1.52	2.17	1.6	.91	January	-4.99	5	4	0	1	-1.54	1.6	48.4	Routine & manual occupations	32.8	1.97	0
1685	63	22.95	37.29	60.24	38.67	75.97	24.38	.73	2.17	15.82	.65	.63	8.56	1.96	1.83	3.79	2.77	1.41	January	-4.79	3	1	0	4	-2.48	.05	47.32	Managerial & professional occupations	20.2	1.65	0
1686	63	23.81	37.72	61.53	38.4	76.11	24.46	.74	2.22	15.87	.66	.64	8.6	1.33	1.16	1.92	1.21	.71	January	-4.59	3	1	1	2	-1.26	.1	36.84	Inactive	38.2	2.5	0
1687	63	24.21	38.05	62.26	38.26	76.31	24.51	.75	2.26	15.89	.67	.65	8.63	1.84	1.68	3.61	1.9	1.14	January	-6.19	3	1	1	1	-1.11	.2	36.84	Managerial & professional occupations	100.8	4.75	0
1688	63	23.88	37.8	61.68	38.36	76.16	24.48	.75	2.24	15.87	.67	.65	8.61	2.55	2.21	3.11	2.62	1.46	January	2.11	1	1	0	2	-1.33	7.2	36.84	Inactive	79.2	3.3
1689	63	25.23	38.57	63.8	38.03	76.61	24.74	.82	2.44	15.98	.73	.69	8.77	1.73	1.61	3.7	2.34	.89	January	.01	3	1	0	1	-1.18	.05	34.31	Managerial & professional occupations	22.6	1.41	0
1690	63	28.37	40.89	69.26	37.21	78.1	25.23	.86	2.86	16.13	.77	.79	9.1	1.85	1.81	4.23	2.52	1.36	January	-4.49	3	1	0	4	-1.26	.05	36.2	Inactive	26.4	1.23	0
1691	63	24.16	37.31	61.48	38.5	75.81	24.15	.69	2.03	15.73	.62	.59	8.42	2.24	2.23	5.37	3.76	2.07	January	6.91	2	1	1	4	-.89	.05	29.92	Routine & manual occupations	38.2	1.2	0
1692	63	27.04	39.52	66.56	37.59	77.11	25.05	.89	2.67	16.1	.79	.75	8.95	1.41	1.34	2.98	1.73	.96	January	-5.49	3	1	1	2	-1.33	.2	34.31	Intermediate occupations	56.4	3.31	0
1693	63	23.39	37.71	61.1	38.54	76.25	24.44	.74	2.22	15.85	.66	.64	8.59	1.64	1.55	3.65	2.15	1.11	January	-5.59	3	1	1	4	-1.69	.05	40.41	Managerial & professional occupations	22.6	1.69	0
1694	63	23.99	37.84	61.83	38.34	76.18	24.52	.76	2.27	15.89	.68	.65	8.64	2.37	2.06	4.05	2.46	.95	January	-2.19	2	1	1	1	-.97	.1	36.84	Managerial & professional occupations	44.4	2.12	1
1695	63	23.98	37.86	61.84	38.33	76.2	24.5	.76	2.25	15.88	.67	.65	8.62	1.85	1.64	3.07	2.48	.98	January	.81	3	4	0	4	-1.62	.3	36.84	Managerial & professional occupations	54	2.38	1
1696	63	23.87	37.73	61.6	38.38	76.12	24.48	.75	2.24	15.87	.67	.65	8.61	1.8	1.71	2.87	2.05	1.24	January	-.49	3	1	0	1	-.89	.3	36.84	Intermediate occupations	59.4	2.82	0
1697	63	23.8	37.7	61.5	38.41	76.11	24.46	.74	2.22	15.86	.66	.64	8.59	1.98	1.76	2.19	2.17	1.18	January	.61	3	1	1	1	-1.26	.05	35.33	Routine & manual occupations	34.4	1.78	0
1698	63	24.03	37.74	61.77	38.39	76.13	24.56	.76	2.32	15.89	.68	.67	8.67	2.09	1.54	1.8	1.63	.63	January	4.01	3	4	0	3	-1.54	.05	33.32	Intermediate occupations	95.6	3.32	0
1699	63	23	37.22	60.22	38.67	75.89	24.35	.72	2.15	15.81	.65	.62	8.54	1.87	1.47	2.39	1.84	.51	January	-2.69	3	4	0	2	-1.54	.05	33.32	Routine & manual occupations	29.6	1.58	0
1700	63	24.25	38.08	62.33	38.25	76.33	24.52	.75	2.27	15.89	.67	.65	8.63	2.02	2.02	4.83	3.1	1.91	January	.11	3	1	1	2	-1.18	.4	36.84	Routine & manual occupations	34.2	1.2	0
1701	63	23.81	37.69	61.5	38.41	76.1	24.47	.74	2.24	15.87	.66	.65	8.61	2.27	2.2	2.85	3	2.22	January	-.49	3	1	1	3	-1.98	.05	35.33	Unclassified [in work,occ unknown]	23.6	1.08	0
1702	63	24.18	37.84	62.02	38.34	76.18	24.6	.77	2.35	15.91	.69	.67	8.7	1.92	1.86	3.56	2.26	1.37	January	-1.79	3	1	0	1	-1.18	.1	40.41	Managerial & professional occupations	41.8	1.97	0
1703	63	24.49	38.24	62.72	38.2	76.44	24.56	.76	2.3	15.9	.68	.66	8.65	2.42	1.9	2.95	1.79	.85	January	-2.49	5	1	1	2	-1.33	.05	36.84	Inactive	14.6	1.54	0
1704	63	23.94	37.88	61.82	38.3	76.18	24.46	.75	2.21	15.89	.67	.65	8.57	3.01	2.37	4.15	2.24	1.11	January	.31	3	1	0	3	-1.18	.05	35.41	Routine & manual occupations	67.6	2.72	0
1705	63	25.23	38.37	63.6	38.05	76.42	24.8	.8	2.51	15.98	.72	.71	8.82	1.54	1.53	2.41	2.17	1.54	January	-10.29	3	4	1	1	-1.69	.05	36.84	Routine & manual occupations	19.8	1.94	0
1706	63	24.11	37.97	62.08	38.29	76.26	24.5	.75	2.25	15.88	.67	.65	8.61	1.93	1.44	2.28	1.36	.53	January	2.91	3	4	1	4	-1.54	.05	36.84	Intermediate occupations	62.4	2.5	0
1707	63	23.95	37.77	61.72	38.36	76.13	24.5	.75	2.26	15.88	.67	.65	8.62	2.68	1.8	3.21	1.64	1.88	January	.31	3	1	0	1	-1.04	.5	36.84	Routine & manual occupations	69.8	2.57	1
1708	63	24.44	38.2	62.65	38.22	76.43	24.55	.75	2.3	15.9	.67	.66	8.65	1.96	1.73	3.88	1.97	.41	January	-4.59	3	1	0	1	-1.54	.05	35.33	Managerial & professional occupations	24.8	2.31	0
1709	63	32.24	41.61	73.84	36.38	77.99	26.31	1.08	3.75	16.53	.96	1.02	9.77	1.73	1.73	3.18	2.8	1.71	January	10.41	3	1	1	4	-1.98	.1	34.31	Intermediate occupations	50.4	1.49	0
1710	63	25.45	38.26	63.71	38.86	77.13	24.59	.82	2.55	15.84	.74	.77	8.75	2.11	1.7	3.41	1.9	.7	January	4.71	3	4	0	1	-1.98	.05	30.35	Routine & manual occupations	82.4	3.14	0
1711	63	23.24	37.56	60.8	38.56	76.12	24.41	.74	2.19	15.85	.66	.63	8.56	1.57	1.55	3.11	2.58	1.52	January	-3.99	3	4	0	3	-1.91	.1	35.1	Routine & manual occupations	21.6	1.18	0
1712	63	25.57	37.8	63.38	38.7	76.5	24.48	.85	2.51	15.72	.76	.72	8.75	2.2	2.03	3.37	2.81	1.39	January	.31	3	1	0	2	-1.11	.05	12.18	Intermediate occupations	98.2	3.79	0
1713	63	36.4	43.21	79.6	35.61	78.82	27.19	1.23	4.48	16.85	1.1	1.2	10.34	2.12	1.86	2.88	2.02	1.39	January	-2.49	4	1	0	2	-1.26	.05	40.41	Intermediate occupations	18	.98	0
1714	63	23.93	37.87	61.8	38.4	76.26	24.57	.77	2.32	15.9	.68	.66	8.67	1.71	1.49	2.2	1.43	1.03	January	-8.49	3	1	1	1	-1.4	.05	40.41	Routine & manual occupations	38.6	2.48	0
1715	63	23.05	37.22	60.26	38.68	75.89	24.34	.72	2.15	15.8	.65	.63	8.54	2.65	2.26	3.68	2.68	1.29	January	8.61	1	4	1	3	-1.83	6.9	33.32	Intermediate occupations	59.2	1.82	0
1716	63	22.86	37.17	60.03	38.71	75.88	24.33	.72	2.14	15.8	.64	.62	8.53	2.33	2.01	3.6	2.26	1.09	January	8.51	3	1	0	3	-.89	3.6	33.32	Inactive	89.6	2.98	0
1717	63	24.11	37.91	62.01	38.32	76.22	24.55	.77	2.3	15.9	.68	.66	8.66	1.09	.71	2	1.42	.98	January	-7.19	3	1	1	3	-1.11	.05	34.31	Routine & manual occupations	36.6	2.86	0
1718	63	24.17	37.99	62.16	38.3	76.29	24.48	.75	2.24	15.88	.67	.65	8.6	2.03	1.82	3.1	2.09	1.21	January	2.31	3	4	0	3	-1.76	.1	35.41	Intermediate occupations	24.8	1.24	0
1719	63	27.63	40.17	67.79	37.38	77.55	25.12	.87	2.75	16.12	.77	.77	9.01	1.56	1.46	2.09	2.1	.98	January	-8.69	3	1	1	2	-1.54	.1	38.78	Managerial & professional occupations	17.2	1.85	0
1720	63	25.39	38.94	64.33	38.06	77	24.64	.81	2.35	15.96	.72	.69	8.68	1.83	1.73	3.04	2.11	1.26	January	-6.99	3	1	1	1	-1.47	.1	35.1	Routine & manual occupations	22	1.8
1721	63	23.8	37.73	61.53	38.39	76.12	24.46	.75	2.22	15.87	.67	.64	8.6	1.48	1.39	3.14	2.41	1.06	January	-2.19	3	1	1	3	-1.33	.05	36.84	Inactive	112.8	4.8	0
1722	63	26.08	39.11	65.19	37.79	76.9	24.77	.83	2.44	16.04	.74	.73	8.73	2.2	1.84	3.24	1.92	.95	January	3.21	3	4	0	4	-1.54	.2	42.22	Inactive	46	2.11	0
1723	63	25.56	38.46	64.02	37.99	76.45	24.86	.81	2.56	16	.73	.73	8.86	1.96	1.68	3.22	1.96	.99	January	-2.59	3	1	1	1	-1.11	.3	35.33	Routine & manual occupations	44.8	2.02	0
1724	63	23.8	37.72	61.52	38.39	76.11	24.46	.74	2.22	15.87	.66	.64	8.59	1.93	1.39	1.89	1.1	.68	January	-8.19	3	1	0	1	-1.26	.05	36.84	Routine & manual occupations	22.2	1.74	0
1725	63	23.96	37.8	61.76	38.35	76.15	24.51	.75	2.26	15.88	.67	.65	8.63	2.35	2.13	4.76	3.26	1.39	January	10.01	2	1	1	3	-1.26	.05	36.84	Managerial & professional occupations	70.2	2.34	0
1726	63	23.23	37.6	60.83	38.58	76.18	24.41	.74	2.19	15.84	.66	.63	8.57	2.21	2.13	4.22	2.64	1.62	January	3.61	3	1	0	2	-3.5	.05	40.41	Intermediate occupations	70.8	2.99	0
1727	63	31.8	40.6	72.41	37.18	77.78	25.11	1.06	2.8	16.13	.94	.81	8.98	2.98	2.41	3.65	2.19	1.3	January	4.01	5	1	0	2	-1.33	.05	32.36	Managerial & professional occupations	96.2	3.24	0
1728	63	23.93	38	61.93	38.22	76.22	24.48	.75	2.22	15.89	.67	.64	8.59	2.6	2.17	3.52	2.32	1.4	January	9.11	5	4	1	3	-1.62	1.9	36.2	Managerial & professional occupations	82.8	2.71	0
1729	63	23.1	37.36	60.46	38.63	75.99	24.41	.74	2.19	15.83	.66	.63	8.57	1.55	1.48	2.08	1.72	1.21	January	.11	3	4	0	4	-1.54	.05	40.41	Managerial & professional occupations	44.2	1.66	0
1730	63	23.45	37.49	60.94	38.53	76.03	24.46	.74	2.23	15.85	.66	.64	8.6	1.53	1.1	1.21	1.06	.62	January	-5.79	3	1	0	1	-1.33	.3	40.41	Routine & manual occupations	25.6	1.48	0
1731	63	23.9	37.74	61.64	38.38	76.12	24.49	.75	2.25	15.87	.67	.65	8.62	1.74	1.47	2.92	2.09	.73	January	-4.99	3	4	0	2	-1.91	.2	36.84	Intermediate occupations	51.8	2.16	0
1732	64	23.5	37.62	61.12	38.47	76.09	24.28	.75	2.26	15.71	.67	.68	8.57	1.08	.77	.85	.76	.43	February	-6.29	2	3	1	1	.77	1.4	20.65	Routine & manual occupations	79.8	3.9	0
1733	64	21.02	36.05	57.07	39.39	75.44	23.92	.66	1.99	15.56	.59	.6	8.36	1.76	1.47	2.27	1.83	1.04	February	-6.39	1	3	1	1	.73	1	21.9	Managerial & professional occupations	28	1.75	0
1734	64	23	37.45	60.45	38.44	75.89	24.13	.71	2.12	15.66	.63	.63	8.48	2.42	1.71	2.22	1.38	.71	February	-.49	1	3	0	3	.41	8.6	20.65	Intermediate occupations	23.2		1
1735	64	24.63	38.22	62.85	38.28	76.51	24.43	.78	2.37	15.78	.69	.71	8.64	2.9	2.33	4.11	2.5	1	December	4.21	1	1	0	4	-.21	.5	15.4	Intermediate occupations	34.6	1.02	0
1736	64	23.43	37.59	61.01	38.49	76.08	24.27	.75	2.25	15.7	.67	.68	8.56	1.58	1.48	2.94	1.85	1.08	February	-1.59	1	3	1	3	.15	1.4	20.65	Routine & manual occupations	28.4	.85	1
1737	64	20.26	34.27	54.53	40.66	74.93	23.47	.56	1.74	15.33	.5	.52	8.14	2.54	1.74	2.28	1.2	.92	February	2.01	1	3	0	2	.44	.05	6.68	Managerial & professional occupations	17.4	.35	1
1738	64	22.01	36.72	58.73	38.98	75.7	24.02	.69	2.07	15.6	.62	.62	8.42	1.78	1.53	2.88	2.02	.88	December	-2.39	1	1	1	2	.01	1.4	32.2	Intermediate occupations	68.4	3.78	1
1739	64	22.98	37.44	60.42	38.45	75.89	24.12	.71	2.11	15.65	.63	.63	8.47	1.91	1.45	2.82	1.51	.43	December	-1.19	1	1	0	3	-.06	4.7	14.25	Routine & manual occupations	22	.99
1740	64	22.57	37.17	59.74	38.73	75.89	24.13	.71	2.15	15.65	.63	.64	8.49	2.49	1.73	2.81	1.69	.34	December	-1.09	1	1	0	3	-.06	.1	13.44	Intermediate occupations	25.6	1.35	1
1741	64	23.22	37.48	60.7	38.52	76.01	24.22	.73	2.21	15.69	.65	.66	8.53	2.04	1.84	3.77	2.48	1.21	December	.01	1	1	1	1	.01	.2	13.44	Intermediate occupations	89.2	3.89	1
1742	64	22.03	36.73	58.75	38.97	75.7	24.02	.69	2.07	15.6	.62	.62	8.42	2.24	1.97	3.03	2.69	1.19	December	-1.49	1	1	0	3	.08	.05	32.2	Inactive	27.2	1.29	1
1743	64	24.11	37.93	62.04	38.32	76.25	24.4	.77	2.36	15.76	.69	.71	8.64	2.44	2.14	4.28	2.99	1.12	December	4.91	1	1	0	3	.05	.05	20.65	Inactive	80	2.03	0
1744	64	22.2	36.79	58.99	38.94	75.72	24.03	.7	2.08	15.6	.62	.63	8.43	2.1	1.73	2.59	2.16	1.22	December	-4.99	1	1	0	2	.3	.4	32.2	Routine & manual occupations	25.6	1.75	1
1745	64	32.58	41.92	74.5	36.36	78.28	25.9	1.1	3.54	16.42	.98	1.08	9.49	1.62	1.45	3.04	1.92	.85	February	-1.09	3	3	0	2	.59	1.1	20.65	Inactive	25.4	.74
1746	64	34.89	42.72	77.61	36.19	78.91	25.43	1.12	3.06	16.29	1	.92	9.14	2.67	1.9	2.84	1.79	.1	February	-1.59	5	1	1	4	.77	.1	22.57	Managerial & professional occupations	25.2	.78	0
1747	64	22.64	37.19	59.83	38.7	75.89	24.14	.71	2.15	15.65	.63	.64	8.49	3.01	2.45	3.86	3	1.12	December	9.91	1	1	1	1	-.6	.1	13.44	Managerial & professional occupations	35.8	1.42
1748	64	31.76	41.53	73.29	36.54	78.07	25.76	1.07	3.43	16.36	.95	1.05	9.41	2.38	1.72	2.69	1.47	.45	December	-.19	2	1	0	2	-.1	.3	20.65	Managerial & professional occupations	31	1.96	0
1749	64	24.08	37.87	61.95	38.43	76.3	24.35	.76	2.31	15.75	.68	.7	8.6	2.09	1.73	2.93	1.97	.84	February	-1.69	3	3	0	2	.3	.05	15.4	Unclassified [in work,occ unknown]	25.6	1.23	0
1750	64	22.85	37.34	60.19	38.57	75.9	24.15	.72	2.15	15.66	.64	.64	8.49	2.11	1.75	2.41	2.05	1.01	December	-3.09	1	1	0	2	.23	8.5	20.65	Managerial & professional occupations	25	1.3	0
1751	64	22.5	37.09	59.59	38.76	75.85	24.12	.71	2.14	15.64	.63	.64	8.48	2.36	1.69	2.25	1.37	.7	February	4.61	5	3	1	3	.55	2.2	13.44	Intermediate occupations	102.2	3.79	1
1752	64	22.72	37.28	60	38.57	75.85	24.11	.71	2.1	15.64	.63	.63	8.47	2.93	2.18	3.18	2.47	.84	December	-.89	1	1	0	3	.26	2.7	20.65	Intermediate occupations	20.4	1.13	1
1753	64	22.86	37.35	60.21	38.56	75.9	24.15	.72	2.14	15.66	.64	.64	8.49	1.99	1.32	1.96	1.07	.47	February	.61	1	1	1	1	.81	.3	30.88	Inactive	74.4	3.66	1
1754	64	23.22	37.49	60.71	38.54	76.03	24.23	.74	2.22	15.69	.66	.67	8.54	2.65	2.39	4.54	3.64	1.41	December	1.71	4	1	0	2	-.46	.05	20.65	Intermediate occupations	82.2	4.28	0
1755	64	22.94	37.41	60.35	38.47	75.88	24.13	.71	2.11	15.65	.63	.63	8.48	2.22	1.92	3.16	1.97	1.09	February	.61	1	3	0	4	.73	1.7	20.65	Inactive	49	1.82
1756	64	22.6	37.2	59.8	38.67	75.87	24.13	.7	2.12	15.65	.63	.64	8.47	2.13	2.12	4	3.39	1.92	December	1.11	2	1	0	3	-.71	.2	12.14	Managerial & professional occupations	30.4	1.38	0
1757	64	24.66	37.26	61.92	38.41	75.66	24.01	.67	2.01	15.65	.6	.61	8.37	2.21	2.09	3.05	3.38	1.84	February	6.21	2	3	1	2	.77	.05	30.99	Intermediate occupations	134.2	4.46	0
1758	64	24.09	37.95	62.04	38.27	76.21	24.38	.77	2.33	15.76	.68	.7	8.62	2.77	2.21	3.84	2.25	.95	February	3.71	1	3	0	4	.7	.1	20.65	Unclassified [in work,occ unknown]	32.6	1.14
1759	64	30.35	41.74	72.09	36.98	78.72	25.19	.96	2.94	16.12	.86	.87	9.07	2.42	2.09	4.09	3.38	1.07	December	2.61	5	1	1	1	-.13	.8	29.95	Managerial & professional occupations	87.4	3.08	1
1760	64	23.37	37.53	60.9	38.54	76.07	24.28	.75	2.26	15.71	.67	.68	8.57	1.27	.96	1.3	1	.46	February	-.99	3	3	0	2	.52	.05	20.65	Managerial & professional occupations	64.2	2.56	1
1761	64	22.76	37.3	60.05	38.56	75.85	24.1	.71	2.1	15.64	.63	.63	8.46	2.12	1.84	4.16	2.83	.99	December	-2.89	1	1	1	1	-.13	1.9	20.65	Intermediate occupations	25.8	1.45	1
1762	64	22.14	36.78	58.92	38.94	75.72	24.03	.7	2.08	15.6	.62	.63	8.43	2.21	1.9	3.32	1.94	1.27	February	-1.59	5	3	1	3	.05	4.5	32.2	Inactive	69.4	2.23	0
1763	64	23.03	37.45	60.47	38.46	75.91	24.15	.71	2.13	15.66	.64	.64	8.49	2.11	1.94	3.16	2.49	1.38	February	-2.39	1	3	0	4	.66	.05	30.88	Inactive	31.8	1.6	1
1764	64	22.91	37.36	60.27	38.55	75.92	24.16	.72	2.16	15.66	.64	.65	8.5	2.81	2.17	2.75	2.23	1.16	February	5.81	3	3	0	4	.62	1.2	20.65	Inactive	91	10.95	0
1765	64	22.48	36.91	59.39	38.87	75.78	24.07	.71	2.11	15.62	.63	.63	8.45	2.16	1.87	3.1	2.74	1.12	December	-1.79	5	1	0	2	-.03	.2	32.2	Intermediate occupations	14.4	1.04	0
1766	64	23.79	37.86	61.65	38.22	76.09	24.25	.73	2.2	15.71	.66	.66	8.54	2.3	1.78	2.65	1.9	.73	February	.91	2	3	1	2	.23	.05	30.88	Routine & manual occupations	109.4	4.88	0
1767	64	21.99	36.7	58.7	38.98	75.69	24.01	.69	2.07	15.6	.62	.62	8.42	2.15	1.77	2.9	2.51	.91	December	-.89	3	1	0	1	-.32	.05	32.2	Managerial & professional occupations	31.6	.61	0
1768	65	24.44	38.25	62.7	38.08	76.33	24.34	.75	2.24	15.79	.67	.67	8.55	2.47	2.11	4.01	2.83	1	December	-.09	5	3	0	3	.7	.5	13.42	Routine & manual occupations	34.2	1.52	1
1769	65	25.68	38.73	64.41	37.92	76.65	24.52	.79	2.4	15.86	.71	.72	8.66	1.67	1.56	3.32	2.48	1.08	December	-.49	3	3	1	1	.62	.2	26.41	Inactive	78.6	3.06	0
1770	65	25.68	38.73	64.41	37.92	76.65	24.52	.79	2.4	15.86	.71	.72	8.66	1.64	1.47	2.39	2.49	.98	December	-6.69	1	3	1	1	.62	.2	26.41	Intermediate occupations	29.7	1.49	0
1771	65	28.16	39.59	67.75	37.31	76.91	24.61	.82	2.45	15.91	.73	.74	8.69	2.32	1.89	3.21	2.18	.92	December	1.41	2	1	0	3	.77	.05	26.41	Managerial & professional occupations	41.2	1.83	0
1772	65	26.81	39.46	66.27	37.62	77.07	24.66	.84	2.49	15.93	.74	.75	8.74	2.5	2.38	5.07	4.21	1.81	December	-1.29	5	3	0	1	.66	.7	26.41	Intermediate occupations	42.2	1.46	0
1773	65	23.29	36.17	59.47	39.38	75.56	23.91	.65	2.03	15.55	.58	.61	8.36	2.19	1.93	2.96	2.57	1.17	December	.51	1	3	1	2	.62	.1	30.2	Intermediate occupations	86.6	2.68
1774	65	21.35	35.24	56.59	39.93	75.17	23.65	.61	1.88	15.41	.55	.57	8.24	2.12	1.87	3.82	2.75	1.07	December	-.59	1	3	1	3	.66	.3	7.54	Intermediate occupations	51.4	1.76	1
1775	65	22.86	37.16	60.02	38.77	75.93	24.19	.71	2.17	15.7	.64	.65	8.49	2.06	1.82	3.25	2.5	1.06	December	2.71	1	3	1	2	.52	2.9	21.65	Inactive	56.2	1.66	1
1776	65	27.03	39.23	66.26	37.58	76.82	24.56	.81	2.42	15.89	.72	.73	8.67	1.49	1.3	3.14	1.59	.77	December	-4.99	2	3	0	1	.66	.05	26.41	Intermediate occupations	45.4	2.06	0
1777	65	22	36.42	58.41	39.12	75.54	23.93	.66	1.97	15.6	.59	.6	8.33	1.48	1.4	2.88	2.29	1.12	December	-6.29	1	3	0	1	.77	4.9	30.35	Inactive	25.6	.69	1
1778	65	23.55	37.79	61.34	38.2	76	24.16	.72	2.12	15.68	.64	.64	8.48	1.78	1.73	5.47	3.68	1.54	December	3.41	1	3	1	3	.48	1.4	23.67	Routine & manual occupations	93.6	3.56	1
1779	65	31.41	41.39	72.8	36.55	77.94	25.03	.94	2.74	16.11	.84	.82	8.92	2.39	1.89	2.84	1.94	.92	December	2.81	3	3	0	1	.59	2.5	26.41	Routine & manual occupations	105	2.99	0
1780	65	23.22	37.68	60.9	38.27	75.94	24.15	.71	2.08	15.71	.63	.63	8.44	2.05	1.7	3.5	1.96	.77	December	-2.59	1	3	0	2	.59	.4	8.12	Routine & manual occupations	46.4	2.02	0
1781	65	23.71	37.91	61.62	38.19	76.1	24.22	.73	2.15	15.73	.65	.65	8.49	1.89	1.65	3.86	2.13	.87	December	-.59	2	3	1	1	.52	6.2	15.69	Managerial & professional occupations	40.8	1.71	0
1782	65	21.56	35.99	57.56	39.64	75.63	24	.67	2.14	15.57	.6	.65	8.43	1.85	1.5	2.65	1.7	.67	December	-4.19	2	3	0	1	.37	.3	19.69	Inactive	19.2	.89	1
1783	65	46.21	47.89	94.1	33.56	81.45	26.98	1.49	4.14	17.01	1.33	1.22	9.97	2.55	1.88	1.9	1.89	.98	December	3.91	1	3	0	3	.66	1.2	26.41	Unclassified [in work,occ unknown]	65.4	2.01	1
1784	66	25.59	39.03	64.62	38.03	77.07	24.73	.79	2.67	15.87	.71	.8	8.86	1.72	1.62	3.87	2.48	1.13	December	-2.19	1	2	1	1	-.24	.3	12.14	Intermediate occupations	48.6	2	1
1785	66	22.7	37.23	59.94	38.65	75.88	24.12	.71	2.13	15.64	.64	.64	8.48	1.66	1.65	4.05	3.23	1.53	December	-1.79	2	2	0	1	-.28	.05	20.65	Intermediate occupations	46.4	2.01	0
1786	66	23.66	37.86	61.52	38.16	76.03	24.17	.72	2.13	15.68	.65	.64	8.49	2.47	2.38	4.12	3.37	1.95	December	6.71	4	2	1	1	-.79	.1	23.67	Managerial & professional occupations	36.4	1.64	0
1787	66	24.61	38.47	63.08	37.92	76.39	24.33	.76	2.25	15.75	.68	.68	8.58	.94	.93	2.42	1.93	.99	December	-6.39	1	2	1	1	-1.26	1.1	23.67	Routine & manual occupations	70.4	4.47	0
1788	66	26.01	39.06	65.06	37.53	76.59	24.62	.81	2.48	15.88	.72	.75	8.75	1.4	1.39	2.69	1.81	1.33	December	-2.29	3	2	0	1	.01	.05	10.82	Routine & manual occupations	48.4	2.34	1
1789	66	26.98	39.74	66.72	37.19	76.92	24.64	.81	2.38	15.96	.72	.71	8.68	2	1.81	3.18	3.45	1.19	December	-4.09	2	2	1	2	.05	.05	19.91	Routine & manual occupations	20.2	.91	0
1790	66	27.27	40.13	67.4	37.19	77.32	24.83	.83	2.66	15.93	.74	.78	8.9	1.86	1.34	1.31	1.34	.95	December	-2.39	5	2	0	2	-.13	1.7	18.61	Routine & manual occupations	39.2	2.19	0
1791	66	36.23	44.32	80.55	35.09	79.41	26.16	1.18	3.61	16.58	1.05	1.08	9.58	2.37	2.01	3.69	2.12	1.16	December	4.51	5	2	0	1	-.24	2.1	25.54	Routine & manual occupations	73.8	1.96	1
1792	66	22.67	37.24	59.91	38.6	75.84	24.1	.7	2.09	15.66	.63	.63	8.44	2.35	1.8	3.14	1.77	.73	December	1.11	2	2	0	2	-.17	.2	22.1	Intermediate occupations	39.8	2.05
1793	66	24.67	38.51	63.19	37.91	76.43	24.34	.76	2.27	15.75	.68	.68	8.59	2	1.5	2.5	1.74	.71	December	-1.99	5	2	0	3	-.21	.05	23.67	Routine & manual occupations	32.4	1.37	0
1794	66	46.67	50.35	97.03	33.4	83.75	27.53	1.44	4.77	17.11	1.28	1.43	10.42	2.13	2.1	3.45	2.68	1.79	December	4.91	3	2	1	3	-.46	.4	23.67	Inactive	29.4	1.14	0
1795	66	29.25	40.96	70.21	36.74	77.7	25.1	.92	2.84	16.09	.82	.86	9	2.33	1.88	2.73	2.01	.93	December	5.61	3	2	1	3	-.06	1.9	9.46	Inactive	111	3.64	0
1796	67	23.6	37.8	61.41	38.42	76.22	24.29	.73	2.27	15.71	.65	.68	8.58	2.14	1.59	2.17	1.19	.49	December	3.31	5	1	0	3	.05	.5	12.14	Intermediate occupations	28.6	1.5	1
1797	67	34.71	42.45	77.16	36.18	78.63	26.01	1.12	3.64	16.51	1	1.15	9.5	2	1.67	3.35	2.05	.78	December	-.49	4	1	1	3	.05	.3	17.24	Intermediate occupations	45.6	2.58	0
1798	67	23.23	36.36	59.59	38.95	75.31	23.85	.64	1.92	15.56	.57	.58	8.29	1.73	1.56	2.48	2.12	1.05	December	-5.29	5	1	0	1	.05	1.2	24.84	Inactive	22.2	1.41	0
1799	67	22.21	36.5	58.71	39.17	75.67	24.15	.7	2.18	15.66	.62	.65	8.49	1.65	1.42	3.26	1.89	.74	December	-4.69	2	1	1	3	.05	.05	21.9	Routine & manual occupations	29.2	2.05	0
1800	67	23.7	37.88	61.58	38.09	75.97	24.17	.71	2.07	15.73	.63	.62	8.44	2.23	1.63	2.24	1.63	.46	December	4.51	1	1	0	3	.05	1.2	8.14	Inactive	46.4	2.46	0
1801	67	27.84	37.65	65.5	37.82	75.47	23.89	.64	1.93	15.59	.57	.58	8.3	2.34	1.8	2.77	1.62	.7	December	-1.19	1	1	1	1	.05	.4	30	Routine & manual occupations	66.5	2.4	1
1802	67	20.99	36.06	57.05	39.38	75.44	23.92	.66	1.98	15.57	.59	.6	8.35	2.09	1.7	3.17	1.74	.76	December	3.81	2	1	1	4	-.32	.05	21.9	Managerial & professional occupations	30.8	1.62	0
1803	67	22.71	36.16	58.87	39.12	75.28	23.83	.63	1.91	15.54	.57	.57	8.28	2.35	1.87	2.31	2.19	.98	December	.51	5	1	1	3	.05	1.8	30	Routine & manual occupations	84.6	4.19	0
1804	67	39.24	46.06	85.3	35.31	81.38	26.19	1.21	3.71	16.57	1.08	1.11	9.62	1.68	1.15	1.65	.89	.34	December	1.61	3	1	1	2	-.32	.3	12.38	Routine & manual occupations	42	1.93	0
1805	67	23.83	37.91	61.74	38.48	76.39	24.33	.75	2.27	15.75	.67	.68	8.57	2.51	1.94	3.31	1.93	.69	December	-5.39	1	1	0	3	.05	3.2	21.65	Managerial & professional occupations	24.2	1.65	1
1806	67	25.91	39.04	64.94	37.31	76.35	24.47	.77	2.26	15.88	.69	.68	8.6	1.8	1.12	1.61	.36	.39	December	-6.49	5	1	0	1	.05	.2	15.98	Managerial & professional occupations	17.4	1.37	0
1807	67	32.64	43.19	75.83	35.78	78.97	25.52	1.01	3.03	16.35	.9	.9	9.16	.83	.8	1.57	.99	.6	December	-5.09	2	1	0	3	.05	.1	36	Unclassified [in work,occ unknown]	30.6	1.62	0
1808	67	23.87	37	60.87	38.69	75.69	24.04	.69	2.09	15.61	.61	.63	8.42	2.46	1.96	4.1	2.37	.69	December	6.71	1	1	0	3	-.32	.05	17.24	Intermediate occupations	39.8	1.33	1
1809	67	29.09	37.95	67.04	37.56	75.51	23.9	.64	1.93	15.6	.57	.58	8.3	2.64	2.07	3.51	2.93	.65	December	1.11	1	1	1	3	.05	.3	30	Intermediate occupations	27.4	1.02	1
1810	68	22.89	37.39	60.28	38.48	75.87	24.12	.71	2.11	15.65	.63	.63	8.47	2.88	2.29	4.17	2.24	1.02	June	7.91	2	1	0	2	.99	.05	10.47	Routine & manual occupations	53.2	2.24	0
1811	68	28.78	40.52	69.31	37.14	77.67	24.92	.9	2.69	16.04	.8	.8	8.88	2.07	1.63	2.99	1.86	.76	June	1.01	2	1	1	3	.95	.1	26.41	Managerial & professional occupations	74.2	2.43	0
1812	68	24.13	37.91	62.04	38.34	76.25	24.38	.77	2.34	15.75	.69	.71	8.62	2.03	1.6	3.64	1.86	.52	June	4.81	4	1	1	4	1.06	.3	20.65	Unclassified [in work,occ unknown]	93.4	4.3	0
1813	68	31.67	40.76	72.43	36.73	77.49	25.36	.96	3.13	16.18	.86	.95	9.18	2.4	2.01	4.35	2.26	.91	June	1.31	2	1	0	4	.88	.3	32.2	Routine & manual occupations	69.2	2.98	0
1814	68	23.73	37.56	61.3	38.54	76.1	24.26	.75	2.25	15.71	.67	.68	8.55	1.96	1.44	3.35	1.73	2.33	June	-3.29	1	1	0	4	.95	2.3	22.57	Inactive	29.2	1.24	0
1815	68	23.24	36.59	59.83	38.9	75.49	23.95	.67	2.01	15.58	.59	.61	8.37	2.74	2.06	3.04	1.98	.53	June	4.31	1	1	0	4	.7	.5	10.81	Routine & manual occupations	66	1.68	0
1816	68	21.23	36.01	57.24	39.43	75.44	23.97	.66	2.02	15.59	.59	.61	8.38	3	2.69	5.59	4.07	1.79	June	5.71	2	1	0	4	.84	.05	24.84	Managerial & professional occupations	44.8	1.65	0
1817	68	31.69	40.79	72.48	36.79	77.58	24.92	.94	2.71	16.04	.84	.82	8.88	2.13	1.84	3.77	2.45	1.05	June	-.49	5	1	1	2	1.2	.5	22.57	Routine & manual occupations	84	4.05	1
1818	68	22.56	37.17	59.73	38.66	75.82	24.11	.7	2.09	15.66	.63	.63	8.45	2.06	1.6	2.69	1.69	.65	June	-1.09	1	1	0	3	.91	2.8	22.1	Intermediate occupations	26.8	1.24
1819	68	22.64	37.21	59.85	38.68	75.89	24.12	.71	2.14	15.64	.64	.64	8.48	2.72	2.26	3.38	2.98	1.2	June	8.11	2	1	0	4	.99	.05	15.31	Unclassified [in work,occ unknown]	43.6	1.48	0
1820	68	23.69	37.42	61.11	38.58	76	24.18	.73	2.18	15.68	.65	.66	8.5	2.08	1.74	2.51	2.24	1.22	June	.71	5	1	0	4	.99	.05	22.57	Routine & manual occupations	94	3.13	1
1821	68	23.81	37.99	61.8	38.16	76.15	24.24	.73	2.19	15.7	.65	.66	8.53	1.62	1.55	3.83	2.37	1.09	June	-1.49	4	1	1	4	1.13	.4	17.47	Routine & manual occupations	33.4	1.13	1
1822	68	22.67	37.24	59.91	38.59	75.83	24.1	.7	2.08	15.65	.63	.63	8.44	1.77	1.62	3.44	2.66	1.1	June	-7.99	3	1	0	3	.99	.7	22.1	Routine & manual occupations	24	1.37	0
1823	68	22.72	37.31	60.03	38.56	75.86	24.1	.7	2.09	15.65	.63	.63	8.45	2.34	1.94	3.73	2.39	.96	June	1.01	3	1	0	4	1.02	.1	22.1	Routine & manual occupations	46	1.68	0
1824	68	23.72	37.68	61.39	38.55	76.22	24.26	.74	2.24	15.71	.66	.67	8.55	1.88	1.49	2.08	1.82	.57	June	-.99	3	1	1	4	.95		15.4	Intermediate occupations	60.4	2.9	0
1825	68	24.22	38.16	62.38	38.23	76.39	24.37	.76	2.33	15.75	.68	.7	8.62	2.39	2.17	4.56	3.32	1.53	June	6.21	1	1	1	3	1.28	.6	14.37	Intermediate occupations	32.8	1.16	1
1826	68	26.27	39.49	65.76	37.51	77	24.6	.81	2.47	15.86	.72	.74	8.74	2.07	1.88	5.4	2.63	1.11	June	-.59	2	1	1	4	1.06	.05	17.47	Intermediate occupations	81	3.41	0
1827	69	23.73	37.56	61.3	38.54	76.1	24.26	.75	2.25	15.71	.67	.68	8.55	2.41	2	2.93	2.1	1.34	October	2.71	5	1	0	1	-.24	.05	22.57	Intermediate occupations	142.2	5.71	1
1828	69	26.43	39.35	65.77	37.63	76.98	24.66	.83	2.48	15.93	.74	.74	8.73	1.21	1.19	2.38	1.68	1.03	October	-.59	3	1	0	1	-1.18	.1	13.42	Intermediate occupations	51.8	1.76	0
1829	69	23.69	37.89	61.59	38.2	76.09	24.22	.73	2.15	15.73	.65	.65	8.49	1.71	1.55	2.69	1.82	.93	October	-.89	3	1	0	1	-.46	.3	15.69	Routine & manual occupations	43	2.54	0
1830	69	23.3	37.71	61.02	38.23	75.94	24.15	.71	2.08	15.71	.63	.62	8.44	1.77	1.72	3.34	2.46	1.41	October	3.21	3	1	1	2	-.75	.05	8.14	Routine & manual occupations	41.8	1.97	0
1831	69	23.46	37.67	61.13	38.49	76.16	24.25	.74	2.24	15.7	.66	.67	8.55	1.64	1.57	2.91	2.39	1.3	October	-2.49	1	1	0	1	-.6	.5	15.31	Intermediate occupations	26	1.81	0
1832	69	23.64	37.86	61.49	38.21	76.07	24.21	.73	2.14	15.73	.65	.64	8.48	1.45	1.35	2.89	2.06	.95	October	-2.79	1	1	1	2	-1.11	1.8	15.69	Intermediate occupations	77.8	3.53	0
1833	69	25.01	38.52	63.53	37.93	76.45	24.45	.78	2.32	15.84	.69	.7	8.61	2.37	1.79	2.01	1.81	.95	October	5.51	1	1	0	3	-.97	2.2	13.42	Routine & manual occupations	140	4.51	1
1834	69	24.13	38.07	62.2	38.14	76.21	24.29	.74	2.2	15.77	.66	.66	8.52	1.71	1.43	2.32	1.6	.85	October	1.11	3	1	0	2	-.46	.05	13.42	Managerial & professional occupations	51.2	2.44	0
1835	69	15.48	31.68	47.16	42.58	74.26	22.97	.5	1.56	15.01	.45	.47	7.96	1.52	1.22	2.09	1.12	.46	October	-.59	1	1	1	3	-1.04	.4	7.91	Intermediate occupations	28.4	1.43	1
1836	69	27.48	39.88	67.36	37.04	76.92	24.79	.84	2.52	16	.75	.76	8.78	1.33	1.31	2.99	1.84	1	October	.71	2	1	0	1	-.53	.1	14.87	Routine & manual occupations	43	1.64	0
1837	69	33.43	43.41	76.85	35.77	79.18	25.58	1.07	3.14	16.37	.95	.95	9.22	1.39	1.36	2.82	2.06	1.15	October	-1.79	5	1	1	1	-.68	.05	11.08	Routine & manual occupations	68.8	2.95	0
1838	69	23.55	37.76	61.31	38.23	75.99	24.21	.72	2.13	15.73	.64	.64	8.47	1.51	1.35	1.9	1.43	1.03	October	6.01	1	1	0	1	-.39	1.9	15.69	Unclassified [in work,occ unknown]	23.6	1.15	0
1839	69	36.75	44.43	81.17	35.36	79.78	26.6	1.17	4.12	16.7	1.05	1.26	9.91	1.84	1.58	2.09	1.94	1.3	October	-.39	4	1	0	1	-.24	.05	14.25	Routine & manual occupations	31	1.49	0
1840	69	24.81	38.49	63.3	37.81	76.3	24.32	.75	2.19	15.79	.67	.66	8.53	1.79	1.54	2.09	1.58	.98	October	-2.79	2	1	0	1	-.89	.05	8.12	Routine & manual occupations	22.8	1.41	0
1841	69	23.67	37.88	61.55	38.2	76.08	24.22	.73	2.15	15.73	.65	.64	8.49	1.85	1.48	1.69	1.75	.84	October	-2.19	5	1	0	1	-.24	4.8	15.69	Intermediate occupations	61.4	2.74	0
1842	69	28.93	40.94	69.87	37.06	78	25.05	.9	2.82	16.07	.81	.83	8.98	1.6	1.37	2.56	1.6	.71	October	-1.69	5	1	1	2	-.82	.3	13.42	Routine & manual occupations	89	4.32	1
1843	69	23.2	37.67	60.87	38.27	75.94	24.15	.71	2.09	15.71	.64	.63	8.45	1.83	1.38	1.89	1.17	.71	October	5.51	2	1	1	2	-.32	.1	8.12	Intermediate occupations	39	1.91	0
1844	69	23.65	37.88	61.53	38.2	76.08	24.21	.73	2.14	15.73	.65	.64	8.48	1.34	1.24	2.04	1.46	.83	October	.91	5	1	0	1	-.32	1.3	15.69	Managerial & professional occupations	29.2	1.72	0
1845	69	47.15	50.88	98.03	33.28	84.16	27.41	1.5	4.58	17.1	1.34	1.33	10.31	1.66	1.41	2.12	1.58	.8	October	7.11	3	1	1	1	-.39	.2	13.42	Routine & manual occupations	113.8	3.86	1
1846	69	23.68	37.92	61.6	38.18	76.1	24.21	.73	2.14	15.73	.65	.64	8.49	1.6	1.4	2.03	1.6	.93	October	-.19	1	1	1	1	-.32	.05	13.06	Intermediate occupations	29.4	1.26	0
1847	69	51.95	53.16	105.11	32.51	85.68	28.26	1.63	5.29	17.42	1.46	1.52	10.84	1.46	1.38	2.72	1.99	1.01	October	-2.79	5	1	0	1	-.75	.05	13.42	Managerial & professional occupations	55.8	2.29	0
1848	70	21.86	36.63	58.48	39.05	75.68	24.03	.68	2.05	15.62	.61	.62	8.41	2.23	1.68	3.06	1.84	.8	February	-.09	2	4	1	1	-.82	.05	12.38	Managerial & professional occupations	25.8	1.3	0
1849	70	21.9	36.79	58.7	38.92	75.71	24.04	.69	2.06	15.62	.61	.62	8.42	2.41	1.74	2.98	1.74	.71	February	5.01	5	4	0	1	-.24	.05	12.14	Routine & manual occupations	27.2	1.59	0
1850	70	22.21	36.11	58.32	39.2	75.31	23.85	.64	1.93	15.55	.57	.58	8.3	1.58	1.34	2.56	1.37	.66	February	-6.49	1	4	1	2	-.03	3.8	30	Intermediate occupations	39	1.74	0
1851	70	21.51	36.22	57.73	39.31	75.52	24.01	.68	2.07	15.6	.6	.62	8.41	1.3	1.24	3.51	2.89	2.05	February	-4.79	2	4	1	3	.05	.2	21.9	Inactive	58.6	2.54	0
1852	70	23.78	37.16	60.94	38.66	75.83	24.11	.69	2.09	15.69	.61	.63	8.42	1.49	1.33	2.4	1.84	.74	February	-6.09	2	4	0	2	.05	.05	18.8	Routine & manual occupations	34.6	4.05	0
1853	70	21.28	36.17	57.45	39.34	75.51	23.95	.67	2.02	15.57	.6	.61	8.38	1.97	1.7	3.49	1.98	.94	February	.01	2	4	1	2	-.97	.05	21.9	Intermediate occupations	31.8	1.45	0
1854	70	21.34	35.94	57.28	39.42	75.35	23.88	.65	1.96	15.55	.58	.59	8.33	2.09	1.85	4.57	2.72	.94	February	1.11	2	4	0	2	-1.33	.05	24.84	Managerial & professional occupations	33.8	1.77	0
1855	70	21.62	36.08	57.7	39.33	75.41	23.91	.66	1.99	15.56	.59	.6	8.35	1.88	1.62	2.48	1.71	.82	February	-.49	5	4	1	3	-.46	2	30	Intermediate occupations	50	2.86	1
1856	70	21.79	36.35	58.13	39.24	75.59	24.07	.68	2.11	15.62	.61	.64	8.45	2.02	1.89	4.15	3.31	1.47	February	-.19	1	4	0	4	-1.11	.05	21.9	Routine & manual occupations	21.4	.95	1
1857	70	16.57	31.01	47.58	43.24	74.24	22.81	.46	1.45	14.89	.41	.42	7.92	1.47	1.21	1.98	1.33	.45	February	-.99	2	4	0	1	-1.04	7.1	38.52	Managerial & professional occupations	28.2	1.2	1
1858	70	21.56	36.47	58.03	39.1	75.57	23.98	.67	2	15.6	.59	.6	8.38	2.18	1.82	3.08	2.17	.89	February	1.91	1	4	1	2	-.32	1.8	45.13	Routine & manual occupations	68.8	3.47	1
1859	70	25.32	38.69	64.01	38.18	76.86	24.58	.8	2.47	15.87	.72	.74	8.71	1.87	1.66	3.47	2.04	.98	February	-4.59	3	4	0	1	-.1	.1	29.95	Routine & manual occupations	41.4	2.24	0
1860	70	24.13	36.66	60.79	38.73	75.39	23.86	.65	1.95	15.55	.58	.58	8.31	2.18	1.84	3.23	2.16	1.03	February	.51	1	4	1	2	-.75	.05	10.81	Intermediate occupations	34.4	1.05	1
1861	70	21.6	36.45	58.04	39.16	75.61	24.01	.68	2.04	15.62	.61	.62	8.39	2.17	1.72	2.79	1.83	.71	February	1.91	2	4	1	4	-.6	.3	15.18	Routine & manual occupations	63.6	2.85	0
1862	70	22.15	36.52	58.67	39.15	75.68	24.13	.7	2.17	15.65	.62	.65	8.48	2.28	1.86	3.77	2.28	.76	February	3.21	5	4	0	1	-.1	1.6	21.9	Routine & manual occupations	49.4	2.01	1
1863	70	22.58	37.14	59.72	38.84	75.97	24.17	.69	2.15	15.68	.62	.64	8.49	2.7	2.11	3.82	2.19	.56	February	3.21	1	4	0	4	-.89	4.3	23.86	Intermediate occupations	60.4	2.32	0
1864	71	37.59	46.18	83.77	33.64	79.82	26.03	1.12	3.29	16.67	1	1	9.36	1.91	1.57	2.44	1.55	.7	January	-.69	2	2	1	1	-.53	.05	23.21	Managerial & professional occupations	27.8	1.56	1
1865	71	63.29	58.74	122.03	29.2	87.94	28.83	2.01	5.16	18.05	1.8	1.56	10.78	2.38	2.15	4.95	3.11	1.45	January	2.21	5	2	0	2	-.64	.05	24.81	Intermediate occupations	78.8	3.36	0
1866	71	34.4	44.37	78.77	34.3	78.66	25.56	.99	2.81	16.5	.88	.84	9.05	2.73	2.27	3.04	2.23	1.3	January	2.61	5	2	0	1	-.75	.36	20.2	Inactive	42.6	2.2	0
1867	71	55.09	55.11	110.2	30.31	85.42	28.02	1.74	4.63	17.64	1.55	1.4	10.38	2.63	2.23	3.19	2.52	1.41	January	5.21	1	2	0	4	-.6	4.04	24.81	Managerial & professional occupations		3.31	1
1868	71	38.18	46.47	84.64	33.49	79.95	26.1	1.15	3.32	16.71	1.02	1.01	9.39	1.94	1.73	3.2	1.91	1.09	January	.11	5	2	0	3	-1	.96	23.21	Routine & manual occupations	57	3.23	0
1869	71	60.24	57.5	117.74	29.2	86.7	29.09	1.88	5.58	18.08	1.67	1.72	11.01	2.17	1.94	4.37	2.39	1.17	January	-.09	5	2	0	1	-.6	.37	23.21	Managerial & professional occupations	18.2	1.17	0
1870	71	34.49	44.12	78.61	34.42	78.54	25.72	1.05	3.02	16.56	.93	.93	9.17	2.65	2.36	4.19	3.41	1.64	January	6.11	2	2	0	4	-.82	.05	18.77	Unclassified [in work,occ unknown]	97.2	2.98	1
1871	71	35.2	44.69	79.9	34.08	78.77	25.68	1.04	2.96	16.54	.92	.9	9.14	2.25	2.08	4.34	2.35	1.2	January	-1.89	1	2	0	2	-.82	6.39	24.81	Unclassified [in work,occ unknown]	18.6	.73	1
1872	71	22.82	37.28	60.1	38.42	75.7	23.67	.61	1.86	15.43	.55	.55	8.24	2.57	2.23	3.89	3.17	1.2	January	4.21	2	2	1	3	-.6	.16	37.67	Managerial & professional occupations	38.8	1.06	0
1873	71	49.81	51.12	100.93	31.2	82.33	27.92	1.51	4.77	17.51	1.35	1.47	10.41	1.43	1.36	3.28	1.86	.89	January	-2.29	3	2	1	4	-1.07	.45	35.38	Intermediate occupations	36.8	1.73	0
1874	71	45.27	50.15	95.41	31.88	82.03	27.1	1.42	4.03	17.19	1.26	1.23	9.91	1.83	1.42	2.04	1.37	.7	January	3.91	2	2	0	4	-1.15	.05	24.81	Managerial & professional occupations	52.2	1.86	0
1875	71	32.55	43.47	76.02	35	78.47	25.28	.94	2.82	16.25	.84	.84	9.04	3.03	2.68	3.92	3.14	1.77	January	6.31	1	2	0	4	-.71	3.47	24.82	Intermediate occupations	74	2.33	0
1876	71	31.77	42.85	74.62	35.08	77.93	25.21	.93	2.67	16.28	.83	.8	8.93	1.94	1.7	2.77	2.22	1.07	January	.91	2	2	0	4	-.64	.05	25.74	Inactive	35.4	1.22	0
1877	71	36.38	45.45	81.83	34.27	79.72	25.95	1.11	3.32	16.59	.99	1.02	9.36	2.06	1.88	3.77	2.27	1.37	January	2.81	1	2	1	3	-.57	4.24	24.63	Intermediate occupations	110.2	3.02	1
1878	71	39.14	47.02	86.16	33.09	80.11	26.35	1.17	3.41	16.86	1.05	1.03	9.49	2.08	1.98	3.72	3.1	1.87	January	-2.89	1	2	0	1	-.64	4.64	40.23	Routine & manual occupations	30	1.63	1
1879	71	32.29	42.35	74.64	35.05	77.4	24.93	.85	2.48	16.15	.76	.74	8.78	1.77	1.59	3.6	2.29	1.06	January	-2.39	5	2	1	3	-.57	.05	11.99	Inactive	74.8	4.72	0
1880	72	30.11	42.02	72.12	35.49	77.51	24.93	.88	2.49	16.13	.79	.75	8.8	2.15	2.11	3.73	2.92	2.2	January	-.49	4	1	1	1	-.24	.17	19.85	Intermediate occupations	28.2	1.95	0
1881	72	30.45	41.97	72.43	35.54	77.51	24.99	.89	2.58	16.14	.79	.77	8.85	2.09	1.63	2.39	1.79	.72	January	-1.39	1	1	0	2	-.28	3.2	48.56	Inactive	46.6	2.43	1
1882	72	35.26	44.54	79.8	34.25	78.79	25.85	1.1	3.22	16.54	.98	.97	9.32	2.2	1.85	3.03	2.23	.96	January	-.39	1	2	0	1	-.17	3.85	47.06	Inactive			1
1883	72	30.45	41.98	72.43	35.54	77.52	24.99	.89	2.58	16.14	.8	.77	8.85	1.79	1.49	3.71	1.99	.51	January	1.61	2	1	0	1	-.17	3.3	48.56	Routine & manual occupations	45	2.41	1
1884	72	30.48	42.22	72.7	35.4	77.62	24.98	.89	2.53	16.16	.79	.76	8.83	2.05	1.56	3.02	1.45	.5	January	-.39	5	1	0	2	-.17	.05	23.69	Intermediate occupations	62.6	3.19	0
1885	72	32.26	42.48	74.74	35.12	77.61	25.03	.89	2.61	16.16	.8	.78	8.87	2.02	1.69	3.67	1.82	.76	January	.21	5	1	0	3	-.21	.05	24.23	Inactive	32.2	1.97	0
1886	72	30.8	42.03	72.83	35.48	77.51	24.97	.88	2.57	16.13	.79	.77	8.84	1.57	1.29	1.83	1.63	.63	January	2.11	2	1	1	1	-.21	.05	24.23	Unclassified [in work,occ unknown]	45.6	1.07	0
1887	72	31.55	42.76	74.31	35.12	77.88	25.17	.94	2.68	16.24	.84	.8	8.93	2.85	2.42	4.33	3.05	1.35	January	1.91	1	2	0	3	-.39	.2	44.11	Intermediate occupations	92.8	3.49	0
1888	72	30.2	41.87	72.07	35.6	77.46	24.96	.89	2.56	16.13	.79	.76	8.83	1.55	1.21	2.33	1.21	.46	January	-.29	2	1	1	4	-.24	.57	48.56	Managerial & professional occupations	92.2	7.36	0
1889	72	29.87	41.75	71.61	35.67	77.42	24.88	.86	2.49	16.08	.77	.75	8.79	2.01	1.69	3.76	2.1	.86	January	-3.39	2	1	1	2	-.17	.56	15.49	Routine & manual occupations	49	4.11	0
1890	72	33.04	42.89	75.93	34.93	77.82	25.15	.92	2.7	16.22	.82	.81	8.93	2.26	1.91	3.68	2.58	.95	January	.31	5	1	0	3	-.13	.14	31.03	Routine & manual occupations	24.4	1.53	0
1891	72	30.57	41.96	72.53	35.53	77.49	24.96	.88	2.57	16.13	.79	.77	8.83	2.25	1.85	3.59	1.81	.65	January	-1.89	5	1	0	1	-.24	.17	24.23	Managerial & professional occupations	59.6	2.59	0
1892	72	33.2	43.53	76.73	34.75	78.27	25.48	1.01	2.93	16.37	.9	.88	9.11	2.45	2.19	4.12	3.23	1.34	January	1.01	2	1	1	2	-.24	.05	47.06	Inactive	38.8	1.81	0
1893	72	34.65	43.71	78.36	34.53	78.25	25.4	.98	2.89	16.34	.88	.86	9.06	2.6	2.33	5.36	3.24	1.39	January	4.71	2	1	1	4	-.32	1.24	31.03	Inactive	93.6	2.98	1
1894	72	33.1	43.8	76.9	34.89	78.69	25.41	.96	2.94	16.29	.86	.87	9.12	2.93	2.41	5.49	2.76	1.08	January	5.71	2	1	1	3	-.13	.05	24.82	Managerial & professional occupations	70	2.37	1
1895	72	29.46	41.48	70.93	35.81	77.29	24.82	.85	2.46	16.06	.76	.73	8.76	3.12	2.8	3.08	3.72	1.89	January	8.81	4	1	1	2	-.32	.05	24.82	Inactive	30.8	.84	0
1896	73	30.91	42.25	73.17	35.36	77.62	25.13	.89	2.53	16.29	.8	.76	8.84	1.9	1.74	3.14	2.66	1.25	January	.01	2	3	1	1	-2.45	.12	17.75	Managerial & professional occupations	73.8	2.49	0
1897	73	32.67	43.14	75.82	34.68	77.83	25.22	.92	2.56	16.36	.82	.77	8.86	2.16	1.93	3.68	2.43	1.18	January	-.19	1	3	1	3	-2.45	1.91	24.22	Managerial & professional occupations	55.8	2.91	0
1898	73	33.29	43.59	76.88	34.58	78.17	25.41	.97	2.67	16.46	.86	.8	8.95	1.89	1.7	3.43	1.87	1.1	January	.71	1	3	0	2	-2.16	5.25	21.74	Routine & manual occupations	61.4	1.95	1
1899	73	31.55	42.67	74.22	35.11	77.78	25.2	.92	2.55	16.34	.82	.76	8.86	1.49	1.33	2.62	1.99	.77	January	-.19	2	3	1	4	-2.56	.05	28.4	Routine & manual occupations	53.4	1.81	0
1900	73	40.52	46.76	87.28	33.11	79.87	26.65	1.33	3.8	16.92	1.19	1.15	9.73	1.45	1.45	3.06	2.79	1.44	January	-9.19	3	3	0	1	-2.41	.12	48.56	Routine & manual occupations	21.4	1.08	0
1901	73	34.31	44.33	78.64	34.47	78.79	25.62	1.02	2.88	16.52	.91	.86	9.1	1.82	1.68	2.54	2.11	1.26	January	-6.49	5	3	0	1	-2.45	4.54	35.73	Inactive	18.6	.8
1902	73	34.03	44.13	78.16	34.33	78.46	25.56	1	2.72	16.57	.89	.82	9	1.52	1.44	2.4	1.89	1.2	January	-2.29	1	3	1	3	-2.59	2.01	33.1	Inactive	46.4	1.78	1
1903	73	34.31	44.3	78.62	34.27	78.57	25.59	1.01	2.75	16.57	.9	.83	9.02	1.44	1.18	2.04	1.33	.51	January	-5.69	5	3	1	2	-2.2	.05	33.1	Intermediate occupations	26.2	.95	0
1904	73	48.54	52.86	101.4	31.11	83.97	27.25	1.5	3.95	17.33	1.34	1.18	9.92	2.03	1.83	4.11	3.47	1.39	January	-1.19	5	3	1	1	-2.59	1.04	33.1	Routine & manual occupations	22.6	1.21	1
1905	73	33.34	43.82	77.16	34.71	78.53	25.54	.97	2.87	16.45	.87	.85	9.09	1.89	1.83	3.66	2.59	1.36	January	-1.39	1	3	1	3	-2.05	16.21	28.4	Routine & manual occupations	68.2	2.85	0
1906	73	32.68	43.43	76.11	34.78	78.21	25.39	.96	2.68	16.43	.86	.8	8.96	2.3	1.9	3.48	1.98	.95	January	.61	3	3	0	4	-2.38	.15	41.95	Intermediate occupations	32.2	1.55	0
1907	73	32.29	43.11	75.4	34.99	78.1	25.3	.94	2.65	16.37	.83	.79	8.93	1.78	1.58	3.23	2.37	1.09	January	-2.59	5	3	1	2	-2.34	.15	10.04	Routine & manual occupations	18.8	.61	1
1908	74	32.48	42.95	75.44	35.08	78.03	25.34	.96	2.89	16.27	.86	.86	9.07	1.27	1.26	2.9	2	1.21	July	.21	2	2	1	4	2.25	.16	37.35	Inactive	41.2	1.63	0
1909	74	44.06	48.54	92.6	33.02	81.56	26.81	1.29	3.88	17.02	1.15	1.14	9.79	1.55	1.3	1.96	1.35	.7	July	.51	4	2	1	4	2.79	.13	33.12	Intermediate occupations	25.6	.79	0
1910	74	39.41	46.14	85.55	33.51	79.65	26.58	1.24	3.86	16.79	1.1	1.15	9.79	2.29	2.05	2.64	1.96	1.53	July	6.11	2	2	1	4	2	.05	37.35	Inactive	27.2	.89	0
1911	74	28.33	40.76	69.08	36.24	77	24.69	.83	2.44	15.97	.74	.73	8.73	2.11	2.08	4.33	2.54	1.58	July	7.51	2	2	1	4	2.5	.12	23.81	Routine & manual occupations	36.8	2.01	0
1912	74	28.99	41.12	70.1	36.05	77.17	24.79	.85	2.5	16.02	.76	.75	8.77	2.1	1.95	5.16	3.59	1.24	July	1.01	1	2	1	4	2.5	.05	23.81	Managerial & professional occupations	79.8	2.87	0
1913	74	30.29	41.88	72.17	35.67	77.55	24.91	.86	2.57	16.08	.77	.77	8.83	1.75	1.75	4.98	2.55	1.34	July	-.69	2	2	1	4	2.69	.05	17.57	Routine & manual occupations	38	1.64	1
1914	74	29.75	41.52	71.26	35.78	77.29	24.91	.87	2.56	16.08	.78	.77	8.83	2.26	2.14	4.4	3.29	1.68	July	.41	4	2	0	3	2.72	.05	24.74	Routine & manual occupations	64.6	2.9	0
1915	74	27.93	40.53	68.46	36.35	76.88	24.63	.82	2.4	15.94	.73	.72	8.7	1.86	1.85	4.02	2.41	1.42	July	.71	1	2	1	3	2.61	.74	23.81	Intermediate occupations	21	.67	0
1916	74	32.37	42.32	74.7	35.28	77.6	24.87	.85	2.55	16.07	.76	.76	8.8	2.6	2.29	4.51	2.71	1.5	July	8.51	1	2	1	4	2.72	.4	17.37	Intermediate occupations	88	2.91	1
1917	75	22.57	36.79	59.36	38.91	75.7	24.04	.68	2.06	15.65	.61	.62	8.4	2.58	2.29	4.2	3.15	1.56	January	1.41	3	1	0	4	-.5	338.2	23.27	Unclassified [in work,occ unknown]	19.2	.8	0
1918	75	22.92	37.62	60.54	38.48	76.1	24.06	.7	2.1	15.62	.63	.62	8.44	1.64	1.42	2.71	1.94	.74	January	-2.79	5	1	0	2	-.06	.05	26.72	Managerial & professional occupations	17.6	.57	0
1919	75	27.82	40.24	68.06	36.61	76.85	24.87	.85	2.45	16.14	.75	.73	8.73	2.39	1.49	1.78	1.21	.45	January	.21	5	1	0	3	.08	.05	22.99	Managerial & professional occupations	46	2.39	0
1920	75	27.96	40.35	68.31	36.62	76.97	24.91	.85	2.47	16.15	.76	.74	8.75	1.46	1.31	3.04	1.64	.86	January	-4.09	2	1	1	3	-.35	.6	17.11	Routine & manual occupations	23	1.54	1
1921	75	51.48	51.18	102.66	31.19	82.37	28.04	1.59	4.57	17.76	1.41	1.42	10.28	1.62	1.21	1.19	.62	.94	January	-3.19	3	1	0	1	.44	13.6	16.12	Intermediate occupations	17.4	.9	0
1922	75	25.21	38.85	64.06	37.41	76.25	24.55	.76	2.18	16.01	.67	.65	8.54	1.94	1.58	2.29	1.91	.87	January	-1.49	5	1	1	4	-.35	.1	20.13	Managerial & professional occupations	35.4	1.56	1
1923	75	27.51	40.11	67.62	36.78	76.89	24.81	.83	2.49	16.04	.74	.75	8.77	2.39	1.9	3.15	1.78	.9	January	-3.09	1	1	0	1	-.1	.5	16.46	Intermediate occupations	19.8	1.13	0
1924	75	26.89	39.72	66.61	36.92	76.64	24.77	.81	2.34	16.11	.72	.7	8.66	2.53	2	2.4	2.32	1.11	January	1.31	1	1	0	2	.48	.05	19.68	Managerial & professional occupations	43.2	1.72	1
1925	75	26.77	39.69	66.46	37.06	76.75	24.72	.81	2.34	16.06	.72	.7	8.66	2.02	1.61	2.8	1.5	.71	January	-2.29	5	1	0	2	.05	.05	16.83	Unclassified [in work,occ unknown]	34.8	1.76	0
1926	75	29.84	41.51	71.35	36.18	77.7	25.19	.93	2.72	16.24	.83	.82	8.94	2.62	2.14	3.43	2.38	1.05	January	3.91	3	1	0	2	.19	.05	16.46	Routine & manual occupations	59.8	2.53	0
1927	75	29.83	41.49	71.32	36.31	77.8	25.22	.92	2.79	16.25	.82	.84	8.97	2.04	1.78	4.37	2.18	.9	January	.11	3	1	1	2	-.21	.05	19.11	Managerial & professional occupations	34.4	1.42	0
1928	75	22.54	37.16	59.7	38.64	75.8	24.08	.7	2.07	15.65	.62	.62	8.43	2.05	1.75	3.06	2.57	.89	January	-3.59	5	1	1	1	-.03	.2	22.1	Intermediate occupations	24.6	2.59	1
1929	75	29.54	40.47	70.01	36.48	76.95	24.75	.82	2.46	16.03	.73	.74	8.72	2.37	1.61	1.54	1.21	.65	January	-2.79	5	1	0	3	.3	.05	18.87	Managerial & professional occupations	19.6	1.5	1
1930	75	25.42	38.94	64.36	37.37	76.31	24.57	.76	2.2	16.01	.68	.66	8.55	1.84	1.54	3.86	2	.62	January	-2.19	1	1	0	2	-.17	.05	14.82	Intermediate occupations	20.2	.57	1
1931	75	33.39	43.56	76.95	35.42	78.98	25.53	1.04	2.92	16.44	.93	.87	9.09	1.81	1.64	4.69	3.47	1.32	January	-6.29	1	1	1	2	-.42	.4	14.82	Managerial & professional occupations	19.8	1.46	0
1932	75	31.01	40.26	71.26	36.17	76.42	24.43	.74	2.19	15.9	.66	.66	8.53	2.63	2.05	3.26	2.08	.88	January	3.11	1	1	1	2	-.28	.3	20.6	Managerial & professional occupations	31	1.76	1
1933	75	27.14	39.81	66.96	36.97	76.78	24.67	.81	2.33	16.01	.72	.7	8.66	2.76	2.2	3.35	2.75	.86	January	6.91	2	1	1	2	.23	.5	26.59	Intermediate occupations	53.2	2.49	0
1934	75	27.46	40	67.46	36.82	76.82	24.84	.83	2.42	16.13	.74	.73	8.7	2.13	1.66	2.78	1.61	.68	January	-1.39	5	1	1	3	-.35	.05	14.82	Managerial & professional occupations	42.6	1.76	0
1935	75	26.94	39.69	66.63	37.03	76.72	24.63	.8	2.31	15.99	.71	.69	8.64	2.4	2.28	4.76	3.19	1.77	January	2.91	1	1	1	2	.26	.05	26.59	Managerial & professional occupations	23.6	.41	1
1936	75	36.49	44.64	81.13	34.62	79.26	26.4	1.2	3.6	16.84	1.07	1.11	9.55	2.08	1.83	4.55	2.71	1.06	January	.71	3	1	1	2	-.46	.1	19.68	Intermediate occupations	35.2	1.98	0
1937	75	30.59	42.29	72.87	35.56	77.84	25.38	.95	2.72	16.41	.84	.81	8.97	1.29	.96	1.94	.76	.36	January	-2.49	2	1	1	4	-.6	.3	28.29	Routine & manual occupations	78.8	4.67	0
1938	76	31.56	42.65	74.22	36.21	78.86	25.51	.96	3.22	16.19	.85	.93	9.33	1.83	1.48	2.05	1.54	.78	February	-1.09	5	2	1	4	-.93	.1	18.61	Intermediate occupations	21.2	.97	0
1939	76	24.31	38.32	62.63	37.91	76.23	24.3	.74	2.21	15.73	.66	.66	8.57	2.62	2.17	3.26	2.8	1.3	February	6.91	1	2	1	3	-.79	.2	13.99	Routine & manual occupations	50.8	1.58	1
1940	76	31.45	41.56	73.02	36.01	77.57	25.57	1.02	3.17	16.31	.91	.96	9.25	2.29	1.57	1.57	1.53	1.15	February	-3.29	1	2	0	2	-.75	.05	25.54	Managerial & professional occupations	49	2.41	0
1941	76	27.4	40.12	67.52	36.8	76.92	24.78	.84	2.51	16	.75	.76	8.77	2.66	2.23	3.58	2.66	1.12	February	8.11	3	2	0	4	-.79	2.1	19.93	Routine & manual occupations	28	.44	0
1942	76	35.97	44.57	80.54	33.92	78.5	26.09	1	2.77	17.06	.89	.82	9.03	1.83	1.55	2.7	1.63	.9	February	1.11	5	2	1	3	-.82	.05	35.52	Routine & manual occupations	53.8	.75	0
1943	76	24.65	38.45	63.1	37.76	76.22	24.31	.75	2.21	15.75	.67	.66	8.56	2.08	1.59	2.49	1.49	.7	February	2.81	3	2	0	3	-.93	.05	13.99	Intermediate occupations	54	1.96	0
1944	76	33.64	44.14	77.78	34.61	78.74	25.65	1.03	2.85	16.55	.91	.83	9.1	2.4	1.7	2.01	1.64	.85	February	-2.19	2	2	0	4	-.68	3	35.49	Routine & manual occupations	34.4	1.14	0
1945	76	30.92	40.16	71.08	37.17	77.33	25.45	1.01	3.2	16.24	.9	.98	9.21	2.02	1.53	1.8	1.52	1.02	February	2.11	5	2	1	4	-.89	3.1	10.94	Managerial & professional occupations	73.8	1.77	1
1946	76	27.28	39.73	67.01	37	76.73	24.77	.86	2.55	15.97	.76	.77	8.8	1.79	1.58	2.68	1.69	.97	February	-1.09	1	2	0	3	-.86	1	10.26	Intermediate occupations	22.4		1
1947	76	25.48	38.95	64.43	37.63	76.57	24.49	.78	2.36	15.82	.7	.71	8.67	2.12	1.75	2.58	1.51	1.05	February	1.21	5	2	1	1	-.71	.05	18.91	Managerial & professional occupations	26		1
1948	76	24.9	38.62	63.52	37.72	76.34	24.37	.76	2.25	15.77	.68	.67	8.59	1.74	1.52	2.43	1.98	1.13	February	-2.59	3	2	1	3	-.71	2.8	13.99	Routine & manual occupations	42.6	.03	0
1949	76	24.37	38.3	62.67	37.81	76.11	24.26	.74	2.17	15.73	.66	.65	8.53	2.06	1.62	2.42	1.58	.79	February	2.01	5	2	1	2	-1.07	.05	10.26	Managerial & professional occupations	108.6	4.11	1
1950	76	27.28	39.73	67.01	37	76.73	24.77	.86	2.55	15.97	.76	.77	8.8	1.95	1.79	2.72	2.64	1.21	February	-.29	1	2	0	3	-.68	.05	10.26	Intermediate occupations	25.2		1
1951	76	31.6	42.6	74.19	36.17	78.77	25.54	.96	3.23	16.21	.85	.93	9.33	2.09	1.9	3.67	2.82	1.11	February	1.81	2	2	1	1	-.75	.3	18.61	Routine & manual occupations	49.6	1.75
1952	76	29.23	40.26	69.48	36.44	76.7	24.6	.78	2.28	16	.7	.68	8.6	2.24	1.63	1.78	1.65	1.01	February	2.51	5	2	1	4	-.82	.4	7.66	Routine & manual occupations	84.8	2.48	1
1953	76	26.82	39.64	66.46	37.22	76.86	24.67	.82	2.45	15.94	.73	.73	8.73	1.9	1.05	.98	.65	.76	February	-3.59	1	2	0	3	-.68	.8	25.54	Managerial & professional occupations	27.4		1
1954	77	27.74	40.22	67.96	36.65	76.86	24.81	.85	2.45	16.07	.76	.74	8.75	2.65	1.88	4.93	3.46	1.8	July	4.71	1	2	0	3	.12	.05	13.77	Managerial & professional occupations	27.6	1.42	0
1955	77	37.16	45.25	82.41	33.62	78.87	26.2	1.05	2.88	17.09	.93	.85	9.11	1.74	1.58	3.03	1.84	.68	July	-2.89	2	2	1	4	.23	.05	35.52	Intermediate occupations	77	2.81	0
1956	77	26.63	39.56	66.19	37.02	76.58	24.72	.8	2.32	16.09	.71	.7	8.64	2.32	1.7	2.44	1.68	.63	July	2.81	1	3	1	3	-.06	1.4	14.82	Managerial & professional occupations	27.4	.65	1
1957	77	24.3	38.25	62.56	37.86	76.12	24.25	.74	2.16	15.73	.66	.65	8.53	2.27	2	4.5	2.68	1.07	July	.81	1	2	0	3	.08	.1	10.26	Managerial & professional occupations	31.2	1.64	1
1958	77	27.23	40	67.23	36.77	76.78	24.77	.83	2.41	16.05	.74	.72	8.72	3	2.39	4.12	2.42	1.09	June	5.51	2	3	1	4	.05	.05	13.82	Inactive	32	1.6	1
1959	77	27.08	39.94	67.02	36.81	76.74	24.75	.83	2.39	16.04	.74	.72	8.71	2.89	2.25	4.06	2.64	1.37	July	8.51	2	2	1	4	.08	.05	13.82	Managerial & professional occupations	60.4	2.08	0
1960	77	28.88	40.77	69.65	36.28	77.04	25.03	.88	2.54	16.21	.79	.76	8.82	2.12	1.77	2.77	2.01	.97	June	-.69	1	3	0	4	-.1	.05	5.64	Managerial & professional occupations	22	1.05	0
1961	77	27.55	40.33	67.88	36.55	76.88	24.78	.83	2.4	16.05	.74	.71	8.73	2.15	1.84	2.36	2.07	1.27	July	-3.29	1	2	1	3	.26	.05	21.94	Intermediate occupations	23.8	1.39	1
1962	77	31.29	41.84	73.13	36.07	77.91	25.33	.91	2.96	16.25	.81	.89	9.08	3.41	2.96	5.11	3.77	1.81	June	9.11	1	3	1	4	.08	.2	35.67	missing	80.8	2.13	0
1963	77	26.4	39.35	65.76	37.18	76.53	24.54	.78	2.25	15.95	.69	.67	8.6	2.03	1.77	3.9	2.37	.7	June	1.01	5	3	0	4	.15	.05	26.59	Managerial & professional occupations	20.2	1.4	0
1964	77	29.75	41.24	70.99	36.09	77.33	25.07	.92	2.6	16.21	.82	.78	8.86	2.5	1.99	2.79	2.22	.97	June	1.81	5	3	0	3	.15	.1	18.54	Managerial & professional occupations	23	.83	0
1965	77	29.04	41.04	70.08	36.23	77.27	25.03	.9	2.54	16.2	.81	.76	8.83	1.71	1.55	3.37	2.36	.99	June	-6.79	5	3	1	4	.12	.3	19	Inactive	17.8	.94	1
1966	77	21.73	36.5	58.23	39.27	75.77	24.03	.68	2.06	15.61	.61	.62	8.42	1.8	1.5	2.54	1.93	.86	July	-2.19	2	2	0	4	.34		20.82	Managerial & professional occupations	18.8	1.08	0
1967	77	27.56	40.11	67.67	36.68	76.79	24.83	.84	2.41	16.12	.74	.72	8.71	2.04	1.82	2	2.27	1.24	June	.61	2	3	1	3	.05	.05	22.99	Managerial & professional occupations	79	2.29	0
1968	77	27.69	40.21	67.91	36.65	76.86	24.8	.85	2.44	16.06	.76	.73	8.74	2.51	1.97	2.13	2.21	1.47	June	6.01	1	3	0	3	-.17	.05	20.12	Managerial & professional occupations	27.8	1.04	1
1969	77	27.11	40.01	67.13	36.69	76.71	24.78	.82	2.34	16.11	.73	.7	8.68	2.02	1.67	3.93	1.97	.7	June	2.11	1	3	1	3	.05	.05	11.32	Intermediate occupations	44.8	1.63	0
1970	77	28.44	40.69	69.13	36.53	77.22	24.94	.87	2.55	16.13	.78	.77	8.81	2.68	2.17	4.04	2.41	.88	July	4.91	1	2	0	3	-.03	.6	16.46	Intermediate occupations	18.6	1.05	1
1971	77	27.08	39.94	67.02	36.81	76.74	24.75	.83	2.39	16.04	.74	.72	8.71	2.98	2.54	2.71	3.37	1.5	June	4.41	2	3	1	4	.01	.05	13.82	Intermediate occupations	81.4	3.03	0
1972	77	23.38	37.62	61.01	38.38	76.01	24.22	.73	2.19	15.69	.65	.66	8.53	2.09	1.65	2.75	1.68	.63	June	-4.09	5	3	0	3	-.21	.05	30.88	Routine & manual occupations	23.2	1.59	1
1973	77	26.94	39.82	66.76	36.87	76.7	24.71	.82	2.38	16.01	.73	.71	8.69	2.3	2.14	3.16	3.15	1.63	July	6.41	4	2	1	4	.3	.1	13.82	Inactive	29.4	1.11	0
1974	77	28.09	40.5	68.6	36.61	77.11	24.89	.86	2.51	16.11	.77	.75	8.79	2.37	1.73	2.86	1.68	.56	July	1.41	2	2	0	4	-.1	.1	16.46	Inactive	46	2.07	1
1975	77	35.22	44.07	79.29	34.17	78.24	25.79	.95	2.63	16.86	.85	.78	8.93	1.98	1.45	2.46	1.21	.57	June	2.51	5	3	0	4	-.13	.1	39.94	Routine & manual occupations	20.4	1.24	0
1976	77	26.94	39.82	66.76	36.87	76.7	24.71	.82	2.38	16.01	.73	.71	8.69	2.14	1.99	4.69	3.91	1.42	July	2.61	4	2	1	4	.15	.05	13.82	Inactive	28.8	1.25	0
1977	77	27.46	40.06	67.53	36.65	76.72	24.76	.81	2.34	16.09	.73	.7	8.67	1.94	1.92	3.76	3.14	1.56	July	1.51	3	2	1	4	.34	.05	7.93	Managerial & professional occupations	36	1.24	1
1978	77	30.63	41.98	72.61	35.86	77.84	25.29	.96	2.72	16.33	.86	.81	8.96	3.04	2.62	3.26	2.5	1.2	July	5.11	5	2	0	4	.34	.05	9.12	Managerial & professional occupations	46.4	2.69	1
1979	77	32.16	42.95	75.11	35.4	78.35	25.61	1.02	2.97	16.46	.91	.88	9.14	1.86	1.55	3.01	1.77	.83	June	-3.89	5	3	0	4	-.03	.05	19.76	Intermediate occupations	90.8	4.83	0
1980	77	32.49	43.24	75.73	35.2	78.44	25.56	1.01	2.94	16.43	.9	.87	9.12	2.2	1.8	2.65	1.92	1.13	July	-1.99	1	2	1	4	.15	.05	21.96	Managerial & professional occupations	34.4	1.45	0
1981	77	28.42	40.75	69.17	36.37	77.13	24.95	.88	2.48	16.17	.78	.74	8.78	2.21	1.92	2.62	2.25	1.56	July	1.21	1	3	1	3	-.21	.3	16.59	Managerial & professional occupations	72.60001	2.95	1
1982	77	47.65	48.91	96.56	32.27	81.18	27.6	1.69	4.36	17.44	1.51	1.33	10.15	2.49	1.88	2.84	1.71	.81	June	.41	5	3	0	3	.05	.05	19	Routine & manual occupations	18.6	1.02	0
1983	77	27.04	39.91	66.94	36.8	76.71	24.72	.82	2.36	16.03	.73	.71	8.69	2.46	1.93	3.05	1.98	.83	June	2.31	1	3	0	4	.05	.05	13.77	Managerial & professional occupations	42.4	1.95	1
1984	77	29.69	41.24	70.93	36.11	77.34	25.1	.93	2.63	16.22	.83	.79	8.88	2.7	2	2.47	1.96	1.47	June	3.11	1	2	0	3	.37	.2	18.54	Routine & manual occupations	17.4	1.03	1
1985	77	28.33	40.54	68.87	36.48	77.02	24.87	.88	2.5	16.09	.78	.75	8.78	2.78	2.5	4.31	3.27	2.01	June	8.91	5	3	1	4	-.1	.05	18.54	Managerial & professional occupations	100.4	3.63	1
1986	77	26.78	39.79	66.56	36.86	76.65	24.71	.81	2.33	16.05	.72	.69	8.66	1.95	1.68	3.17	1.9	1.04	June	.81	1	3	0	4	.19	.9	6.86	Intermediate occupations	87	2.88	1
1987	77	26.59	39.63	66.22	36.96	76.59	24.63	.81	2.34	15.97	.72	.7	8.66	2.39	2.26	3.42	2.99	1.88	July	4.71	1	1	0	3	.34	.05	13.82	Routine & manual occupations	30	1.27	1
1988	77	28.17	40.45	68.63	36.52	76.98	24.87	.87	2.49	16.1	.78	.75	8.78	2.86	2.59	3.78	4.54	1.49	July	.91	1	2	0	3	-.03	.05	20.12	Managerial & professional occupations	26.2	1.63	0
1989	77	28.32	40.78	69.09	36.95	77.72	24.98	.86	2.78	15.99	.77	.81	9	2.2	1.83	3.64	1.93	.86	June	-1.49	5	3	1	4	.15	.05	18.61	Managerial & professional occupations	22	1.09	1
1990	78	30.8	42.01	72.8	36.23	78.24	25.06	.92	2.64	16.18	.82	.79	8.88	1.86	1.46	2.74	1.47	.55	May	3.71	3	1	0	3	-.97	.05	19.91	Intermediate occupations	64.6	2.37	1
1991	78	25.95	39.05	65.01	37.39	76.44	24.5	.78	2.29	15.88	.69	.69	8.61	1.98	1.34	2.05	1.36	.84	May	.81	5	2	0	4	-.86	.1	14.87	Managerial & professional occupations	15.8	1.04	1
1992	78	26.04	39.1	65.14	37.29	76.39	24.47	.76	2.22	15.9	.68	.66	8.57	2.04	1.61	3.56	1.68	.66	May	.11	5	1	0	3	-1.11	.4	24.36	Intermediate occupations	24.8	1.22	1
1993	78	26.34	39.26	65.6	37.26	76.52	24.53	.78	2.27	15.92	.69	.68	8.6	2.18	1.89	4.09	2.07	.99	May	-.29	3	1	0	3	-.6	.05	24.36	Routine & manual occupations	36.8	2.22	0
1994	78	42.6	48.38	90.98	33.62	82	26.83	1.35	3.94	16.98	1.2	1.17	9.85	1.67	1.48	2.29	1.98	1.35	May	-3.49	3	2	0	4	-1.07	.2	16.83	Routine & manual occupations	21	1.77	0
1995	78	26.27	39.19	65.45	37.26	76.44	24.56	.8	2.36	15.89	.71	.71	8.67	3.12	2.48	3.9	2.2	1.5	May	-.69	1	2	0	4	-.89	.05	15.98	Routine & manual occupations	74.2	3.35	1
1996	78	23.05	37.49	60.55	38.39	75.88	24.1	.71	2.08	15.65	.63	.62	8.45	1.92	1.88	4.06	2.61	1.55	May	-1.49	3	1	0	3	-.79	.2	15.95	Intermediate occupations	25.2	1.14
1997	78	26.11	39.11	65.22	37.27	76.38	24.51	.77	2.28	15.9	.69	.69	8.61	2.49	1.48	1.69	1.3	.93	May	.41	3	2	1	3	-.89	.7	15.98	Intermediate occupations	23.6	.84	0
1998	78	25.59	38.83	64.43	37.45	76.28	24.43	.76	2.24	15.84	.68	.67	8.59	1.82	1.46	1.85	1.68	.85	May	-5.29	3	2	0	1	-1.18	.05	23.43	Unclassified [in work,occ unknown]	25.6	1.69	0
1999	78	30.59	41.93	72.52	36.19	78.12	25.21	.94	2.73	16.27	.84	.81	8.95	1.84	1.68	4.32	1.98	.87	May	2.61	4	1	0	3	-.6	.6	16.83	Routine & manual occupations	56	2.15	0
[truncated: 2,885 more rows]
