# Supplementary material
Source: publisher figshare collection journal article supplement (https://plos.figshare.com/articles/dataset/_/1614226)
Supplement: Supplementary file 1 [file 1 › S5_Table.docx]

S5 Table. Number of participants with missing data for each variable of interest

| **Independent variable** | **Missing values** |
| --- | --- |
| NO2 (µg/m3) | 0 (0%) |
| NO (µg/m3) | 0 (0%) |
| NOx (µg/m3) | 0 (0%) |
| O3 (µg/m3) | 0 (0%) |
| Oxidants (µg/m3) | 0 (0%) |
| PM10 (µg/m3) | 0 (0%) |
| PM10 exhaust (µg/m3) | 0 (0%) |
| PM10 non exhaust (µg/m3) | 0 (0%) |
| PM2.5 (µg/m3) | 0 (0%) |
| PM2.5 exhaust (µg/m3) | 0 (0%) |
| PM2.5 non exhaust (µg/m3) | 0 (0%) |
| Pm coarse (µg/m3) | 0 (0%) |
| Distance of home from highly trafficked roads (meters) | 0 (0%) |
| Vehicle km driven per year within 100m from home | 0 (0%) |
| Distance of school from highly trafficked roads (meters) | 0 (0%) |
| Vehicle km driven per year within 100m from school | 0 (0%) |
| Month of measurement | 0 (0%) |
| trunk length | 0 (0%) |
| ethnic subgroup | 0 (0%) |
| observer | 0 (0%) |
| sex | 0 (0%) |
| age | 1 (<0.1%) |
| indoor room temperature | 43 (0.8%) |
| school | 0 (0%) |
| cotinine | 127 (2.6%) |
| IMD score | 1 (<0.1%) |
| NS-SEC group | 39 (0.8%) |
| sum of skin folds | 14 (0.3%) |
| fat mass index | 78 (1.6%) |
