# Supplementary material
Source: publisher figshare collection journal article supplement (https://plos.figshare.com/articles/dataset/_/1614226)

## Flow Diagram of the London arm of the CHASE study used for the TRAFFIC study

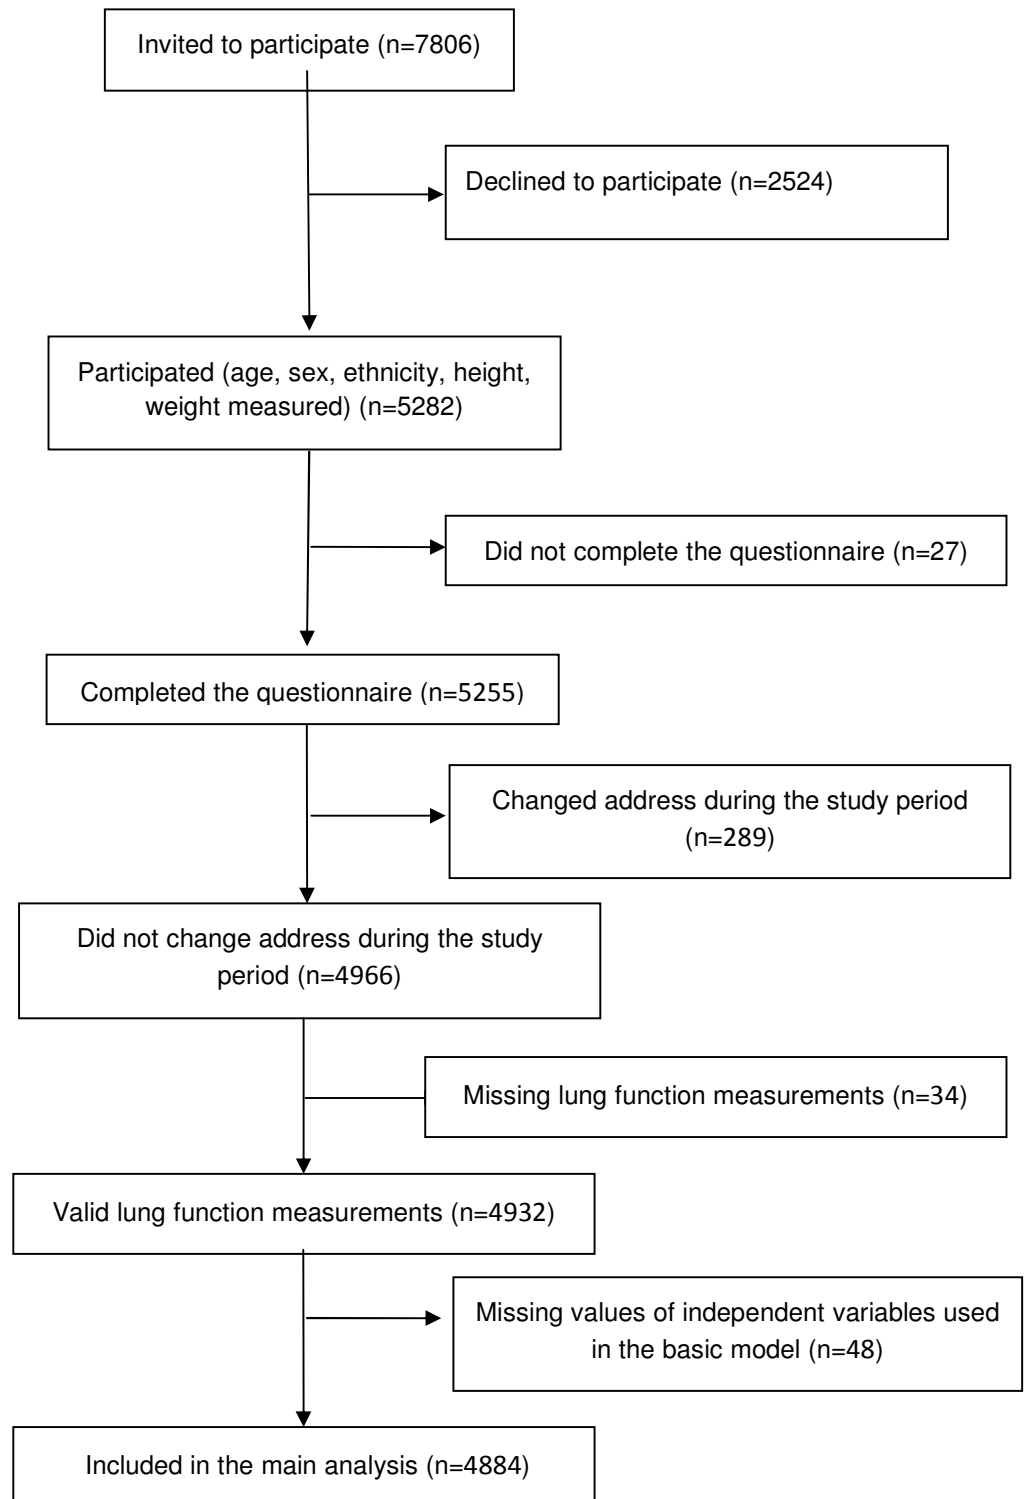

Supplement: Supplementary file [file 1]
