# Supplementary material
Source: publisher figshare collection journal article supplement (https://plos.figshare.com/articles/dataset/_/1614226)

## Flow Diagram of the London arm of the CHASE study used for the TRAFFIC study

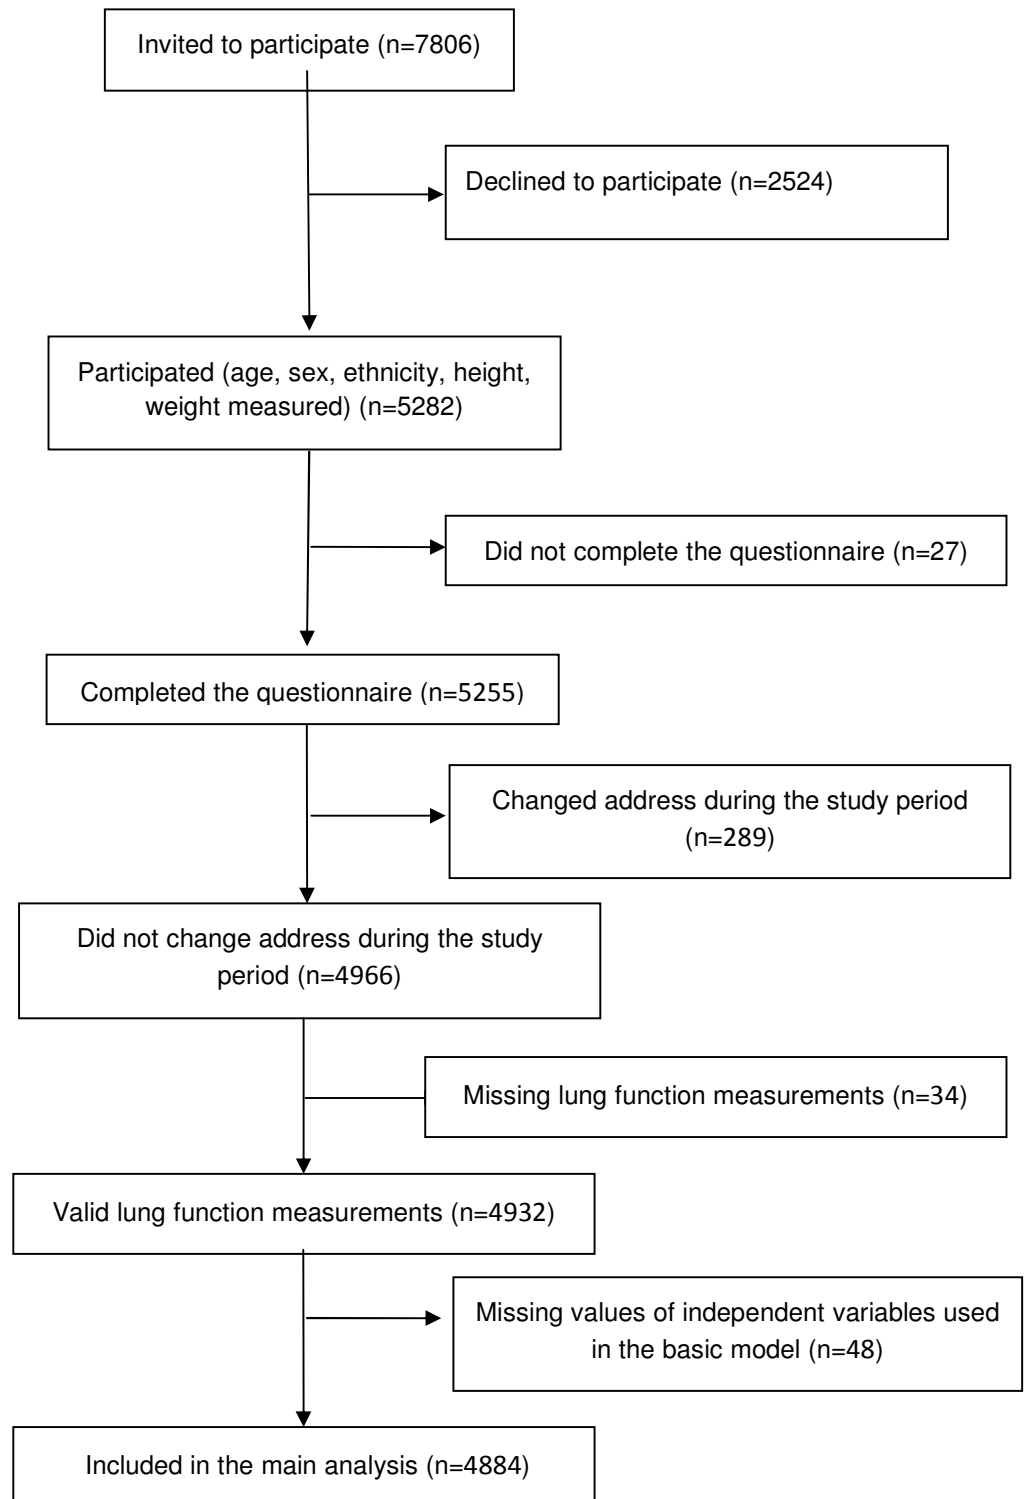

Supplement: Supplementary file 1 [file 1 › S2_Appendix.pdf]
